# Supplementary material
Source: PubMed Central journal article supplement (PMC4124944)

# **Catalyst-Controlled C-O versus C-N Allylic Functionalization of Terminal Olefins**

Iulia I. Strambeanu and M. Christina White\*

*Roger Adams Laboratory, Department of Chemistry, University of Illinois, Urbana, Illinois 61801*

## **Supporting Information: Spectral Data**

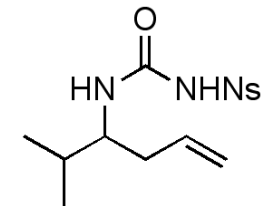

Pulse Sequence: s2pul

Solvent: CDCl<sub>3</sub>

Ambient temperature

File: iPr\_SM

INOVA-500 "sunds1"

Relax. delay 10.000 sec

Pulse 45.0 degrees

Acq. time 4.096 sec

Width 8000.0 Hz

16 repetitions

OBSERVE H1, 499.4299002 MHz

DATA PROCESSING

Line broadening 0.3 Hz

FT size 65536

Total time 3 min, 45 sec

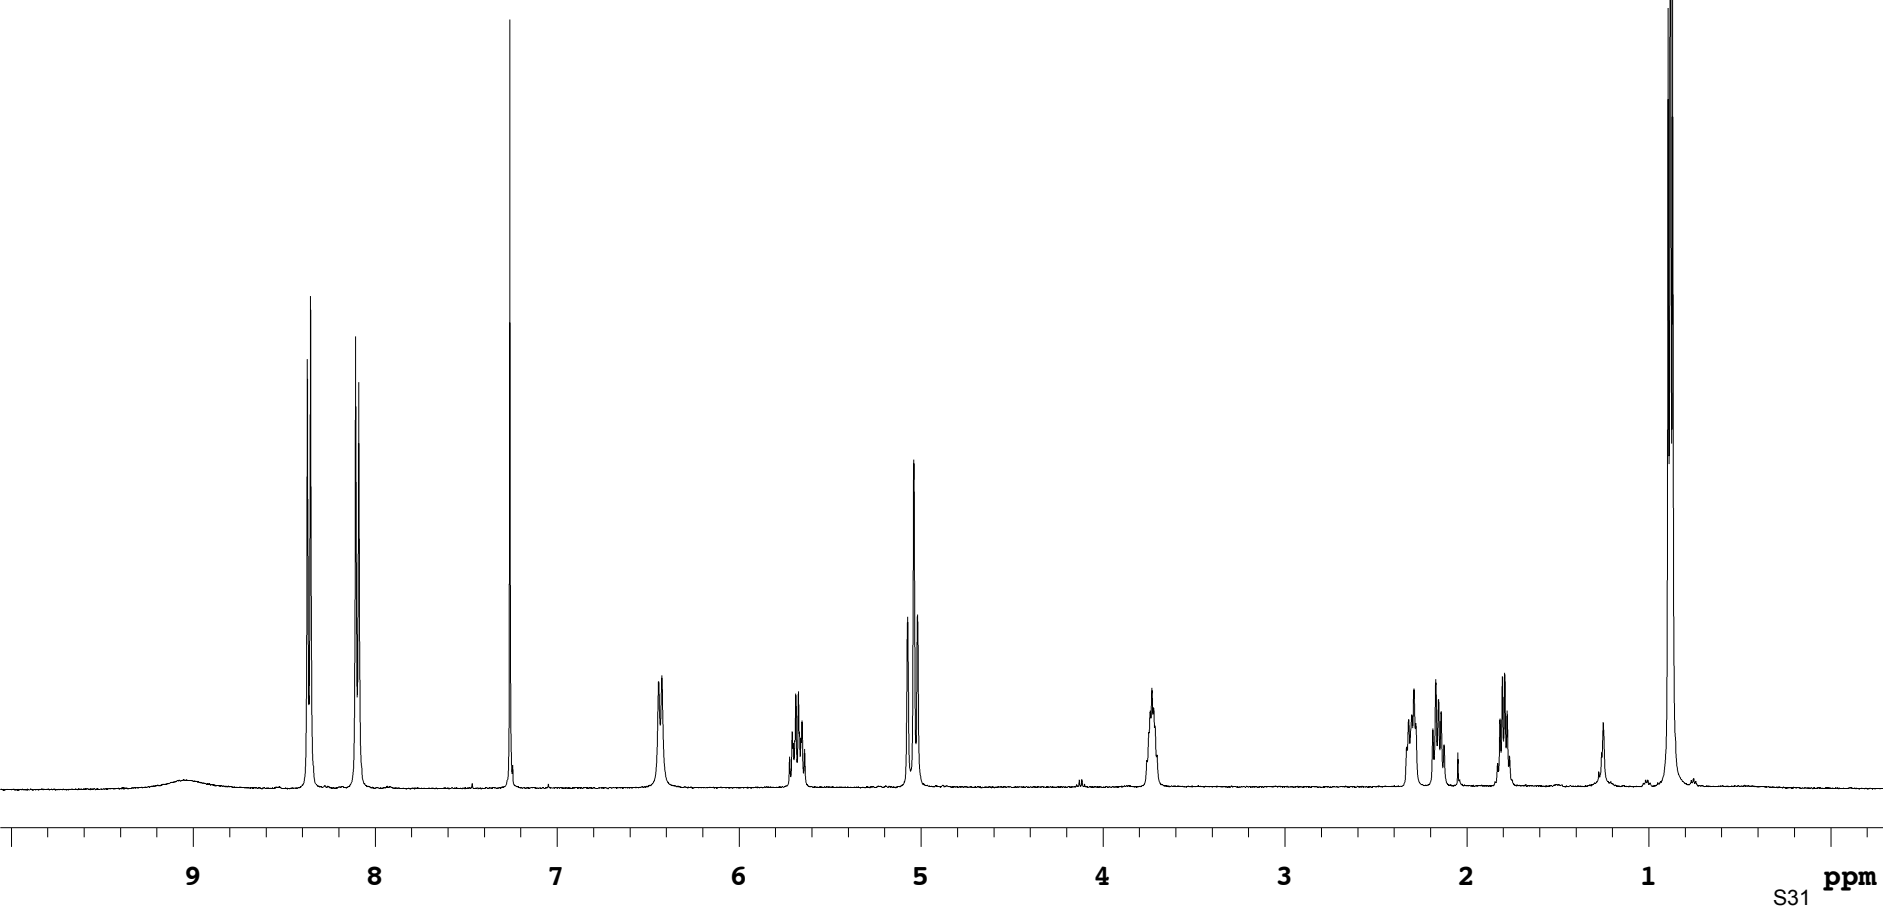

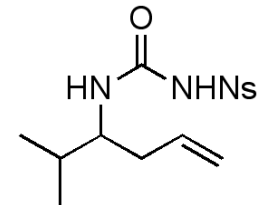

Pulse Sequence: s2pul

Solvent: CDCl<sub>3</sub>

Ambient temperature

User: 1-14-87

File: iPr\_SM\_C

INOVA-500 "sunds1"

Relax. delay 5.000 sec

Pulse 65.9 degrees

Acq. time 1.086 sec

Width 30165.9 Hz

984 repetitions

OBSERVE C13, 125.6472855 MHz

DECOUPLE H1, 499.6923275 MHz

Power 44 dB

continuously on

WALTZ-16 modulated

DATA PROCESSING

Line broadening 1.0 Hz

FT size 65536

Total time 3 hr, 28 min, 8 sec

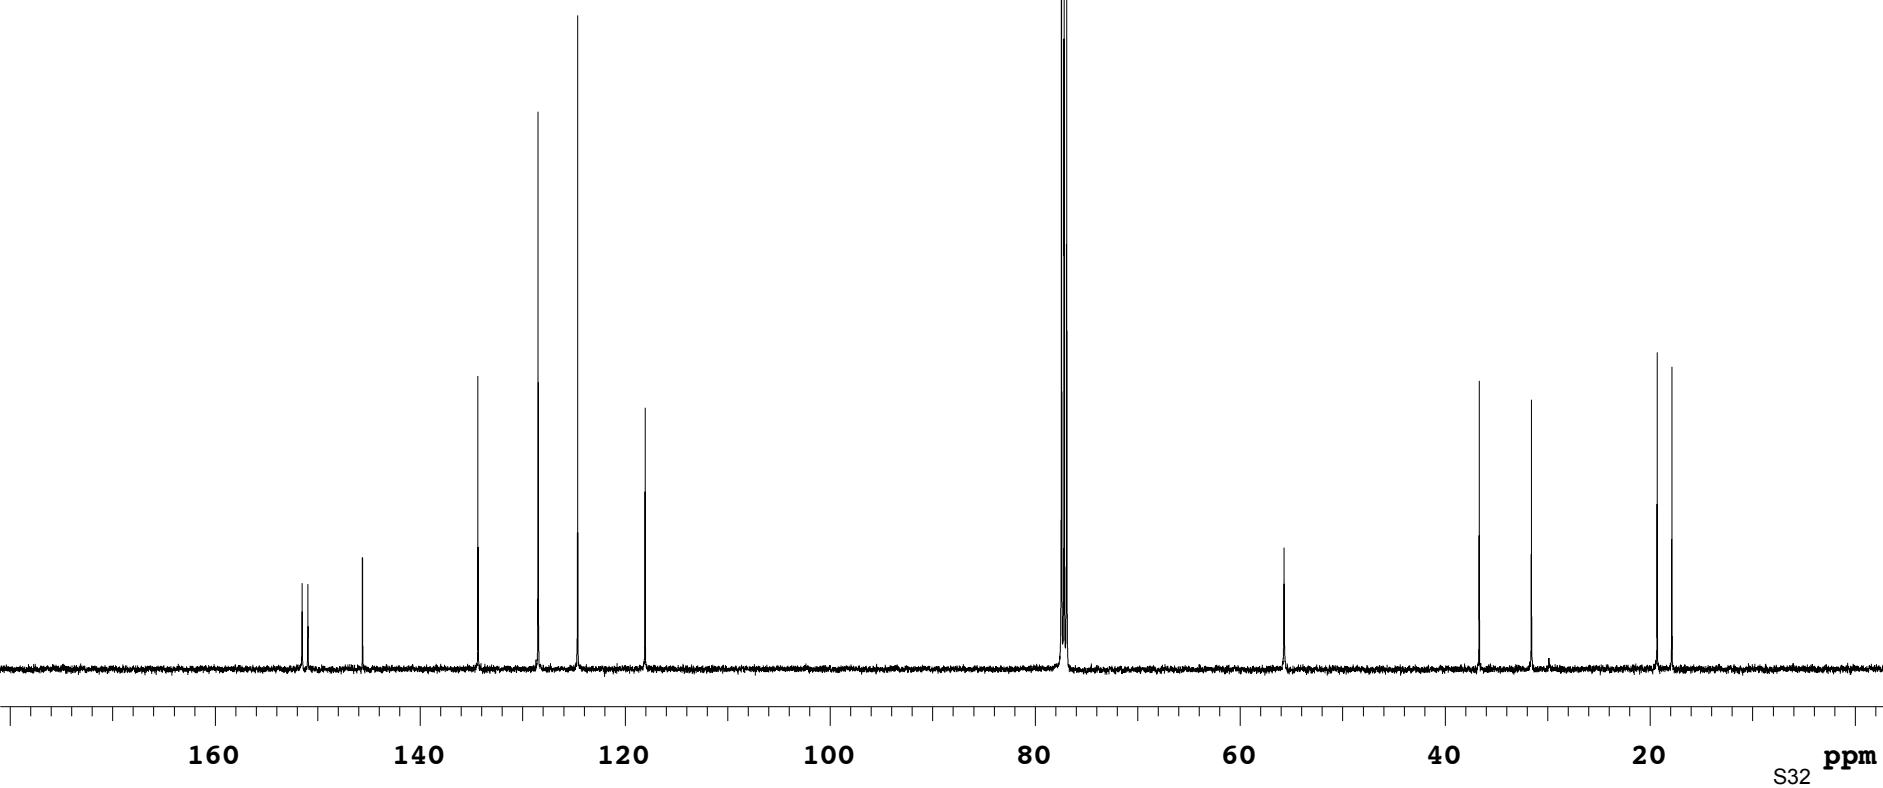

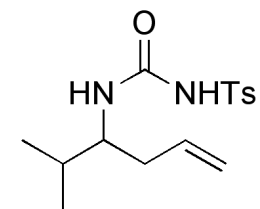

Pulse Sequence: s2pul

Solvent: CDCl<sub>3</sub>

Ambient temperature

File: IIS.105.IX

INOVA-500 "sunds1"

Relax. delay 5.000 sec

Pulse 90.0 degrees

Acq. time 4.096 sec

Width 8000.0 Hz

6 repetitions

OBSERVE H1, 500.0677753 MHz

DATA PROCESSING

Line broadening 0.3 Hz

FT size 65536

Total time 1 min, 12 sec

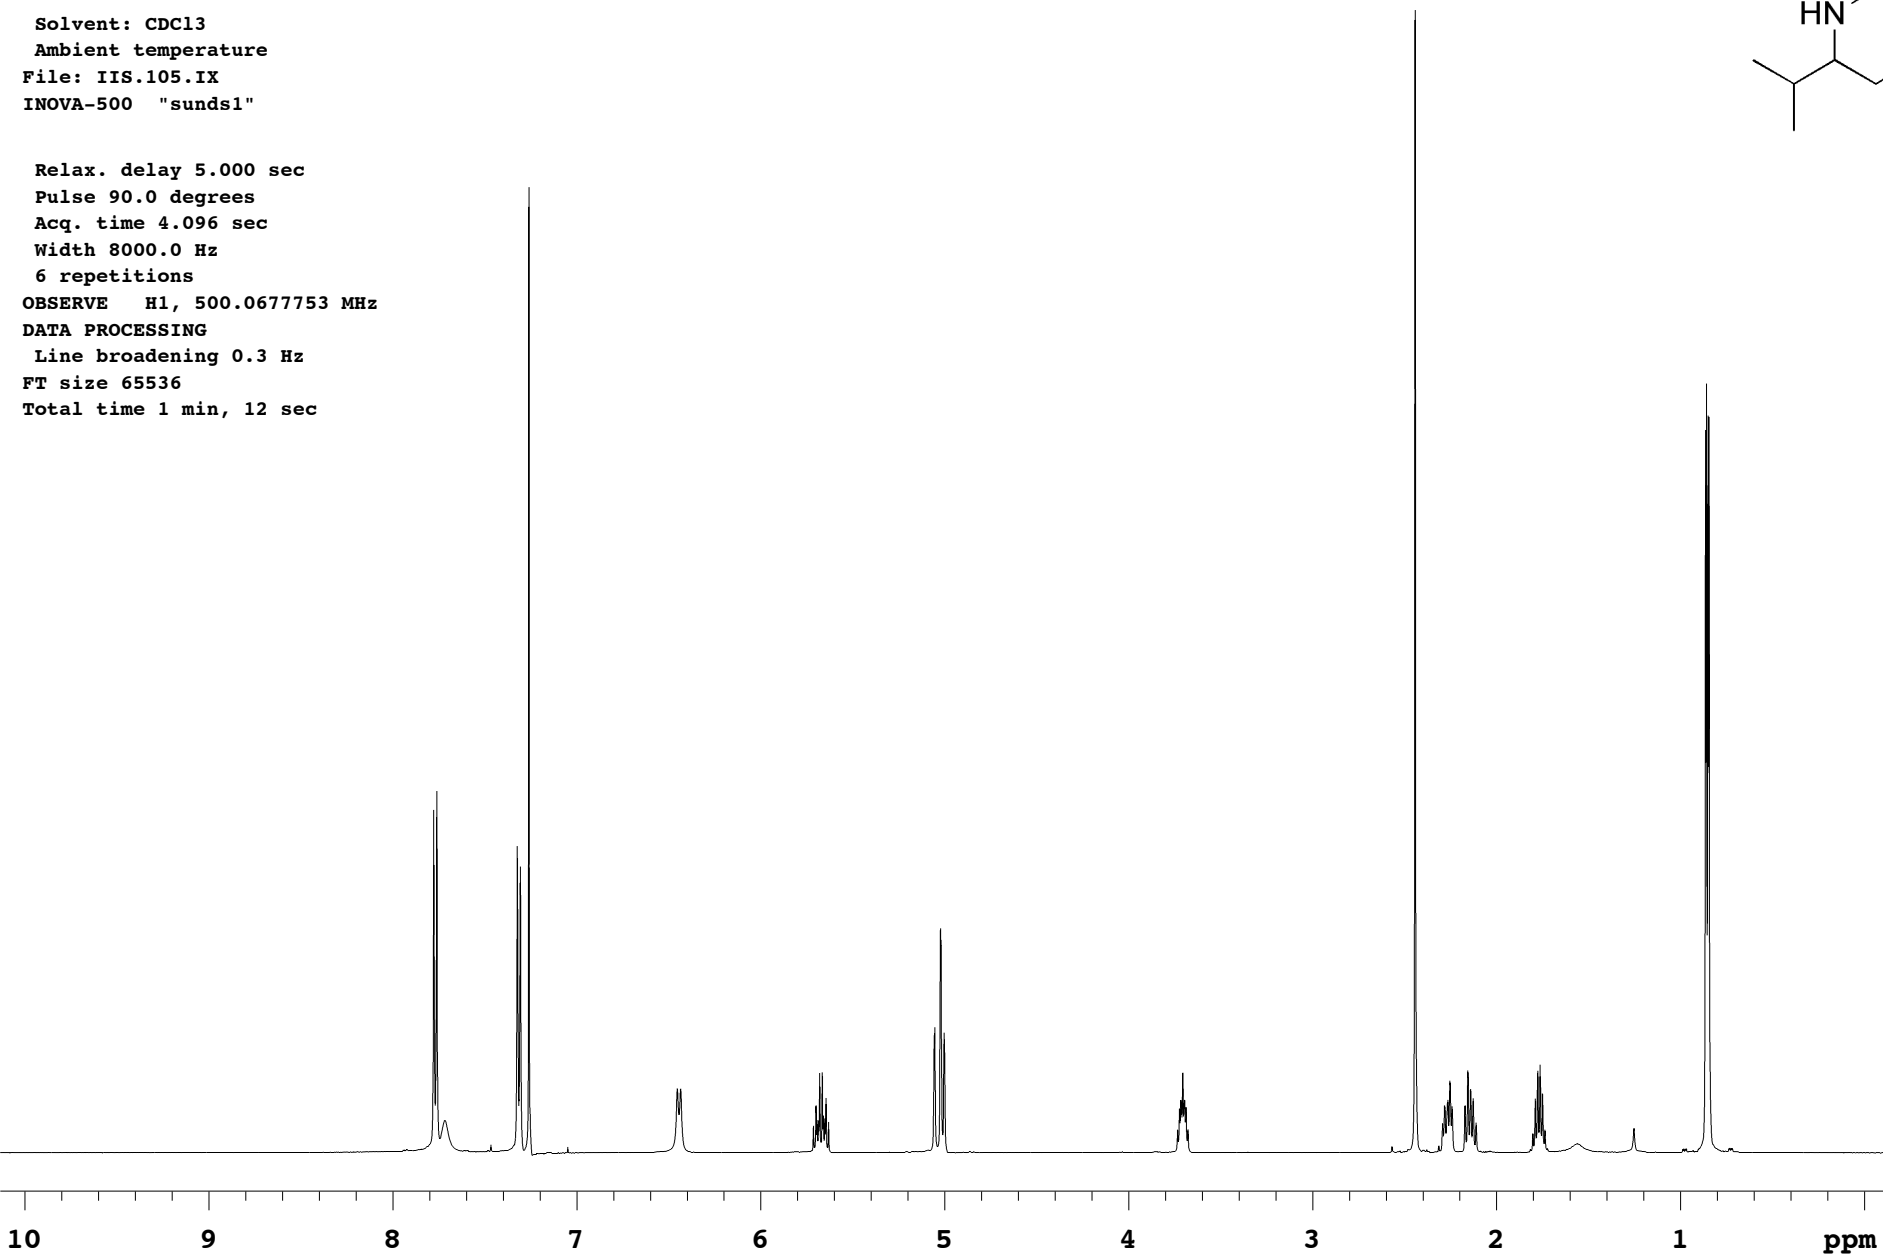



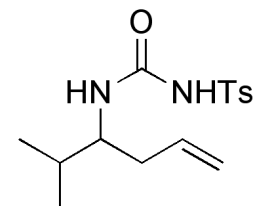

Pulse Sequence: s2pul

Solvent: CDCl3

Ambient temperature

User: 1-14-87

File: Ts.SM.C13

INOVA-500 "sunds1"

Relax. delay 1.000 sec

Pulse 45.0 degrees

Acq. time 1.024 sec

Width 32000.0 Hz

658 repetitions

OBSERVE C13, 125.5817522 MHz

DECOUPLE H1, 499.4315638 MHz

Power 47 dB

continuously on

WALTZ-16 modulated

DATA PROCESSING

Line broadening 1.0 Hz

FT size 65536

Total time 34 min, 51 sec

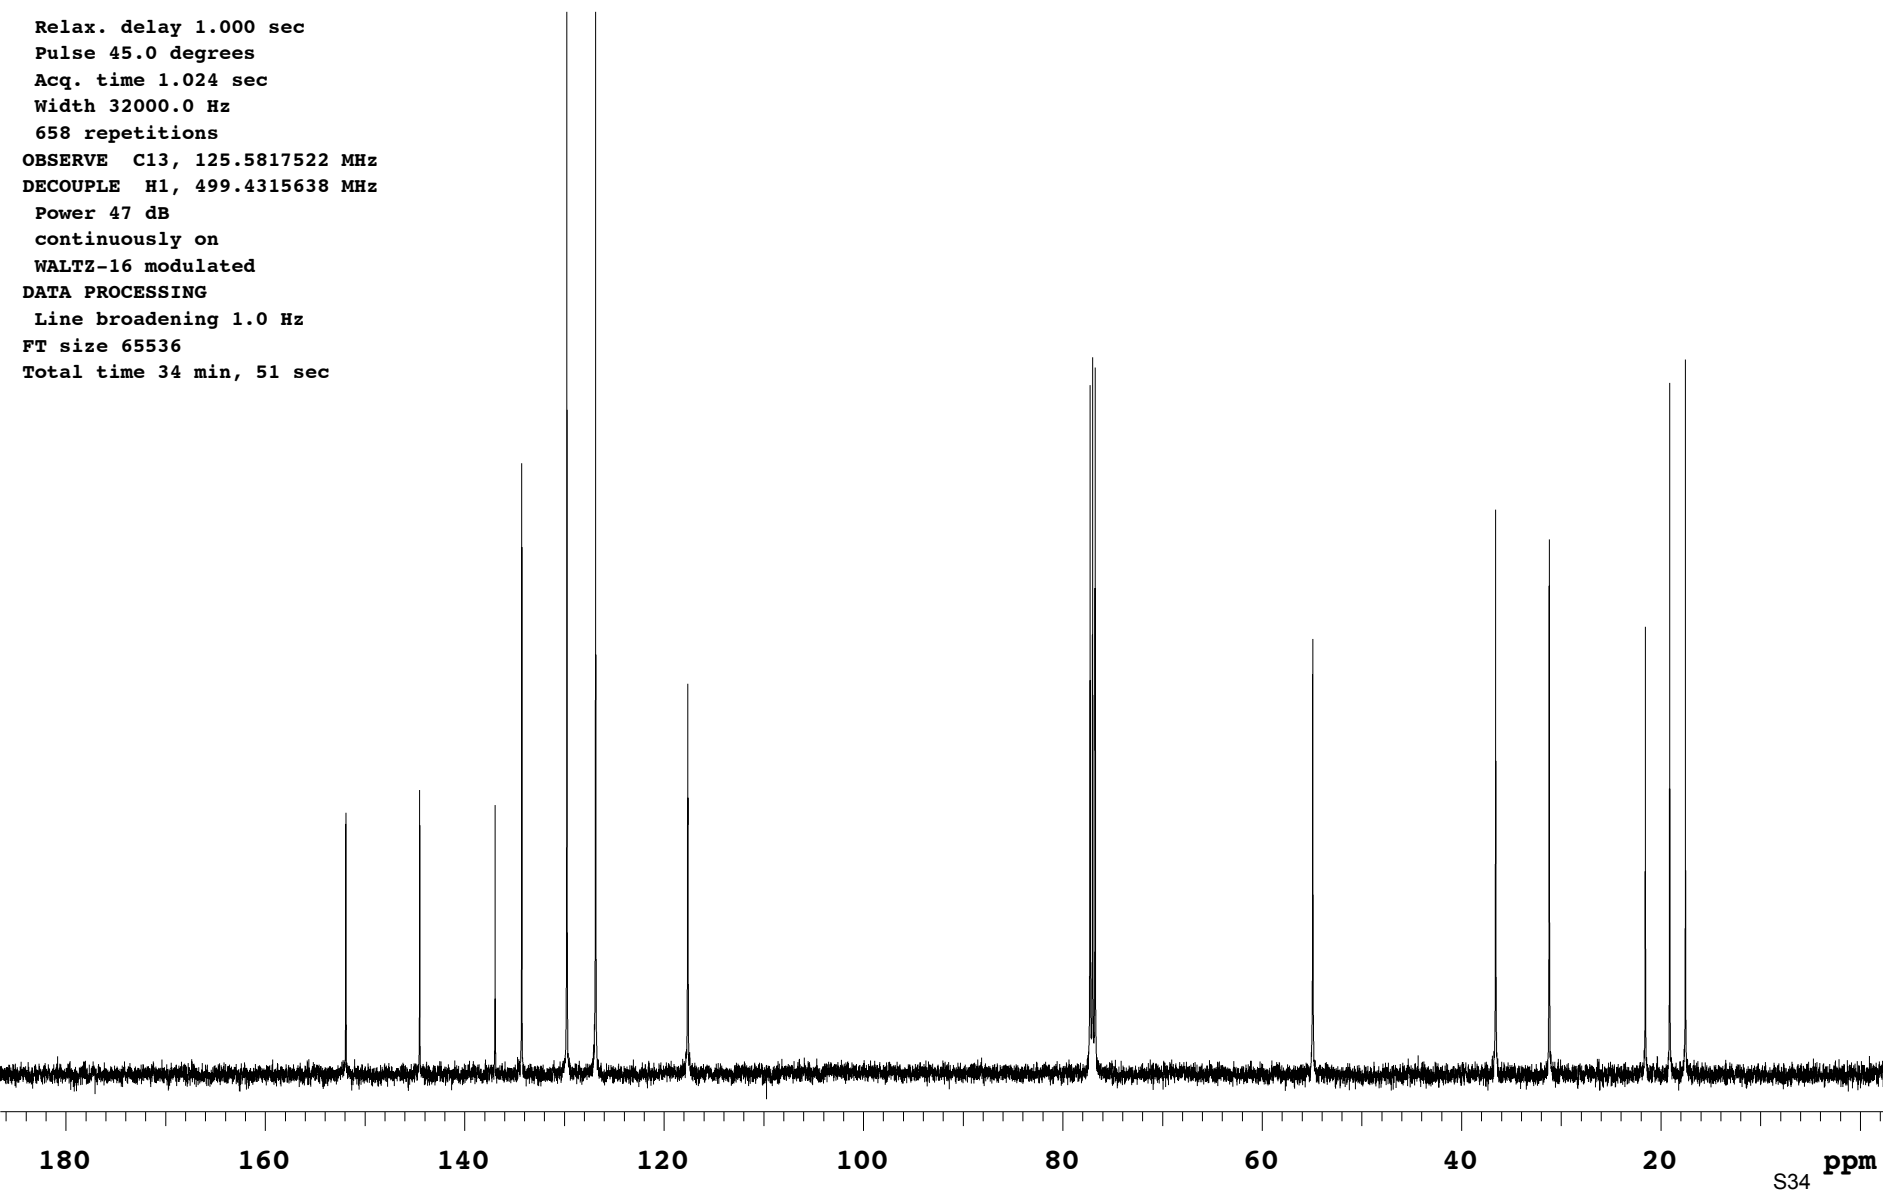

# Strambeanu and White

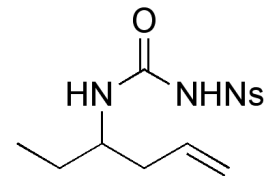

Pulse Sequence: s2pul

Solvent: CDCl3

Ambient temperature

INOVA-500 "ui500nb"

Pulse 90.0 degrees

Acq. time 4.096 sec

Width 8000.0 Hz

8 repetitions

OBSERVE H1, 500.0677750 MHz

DATA PROCESSING

Line broadening 0.3 Hz

FT size 65536

Total time 0 min, 32 sec

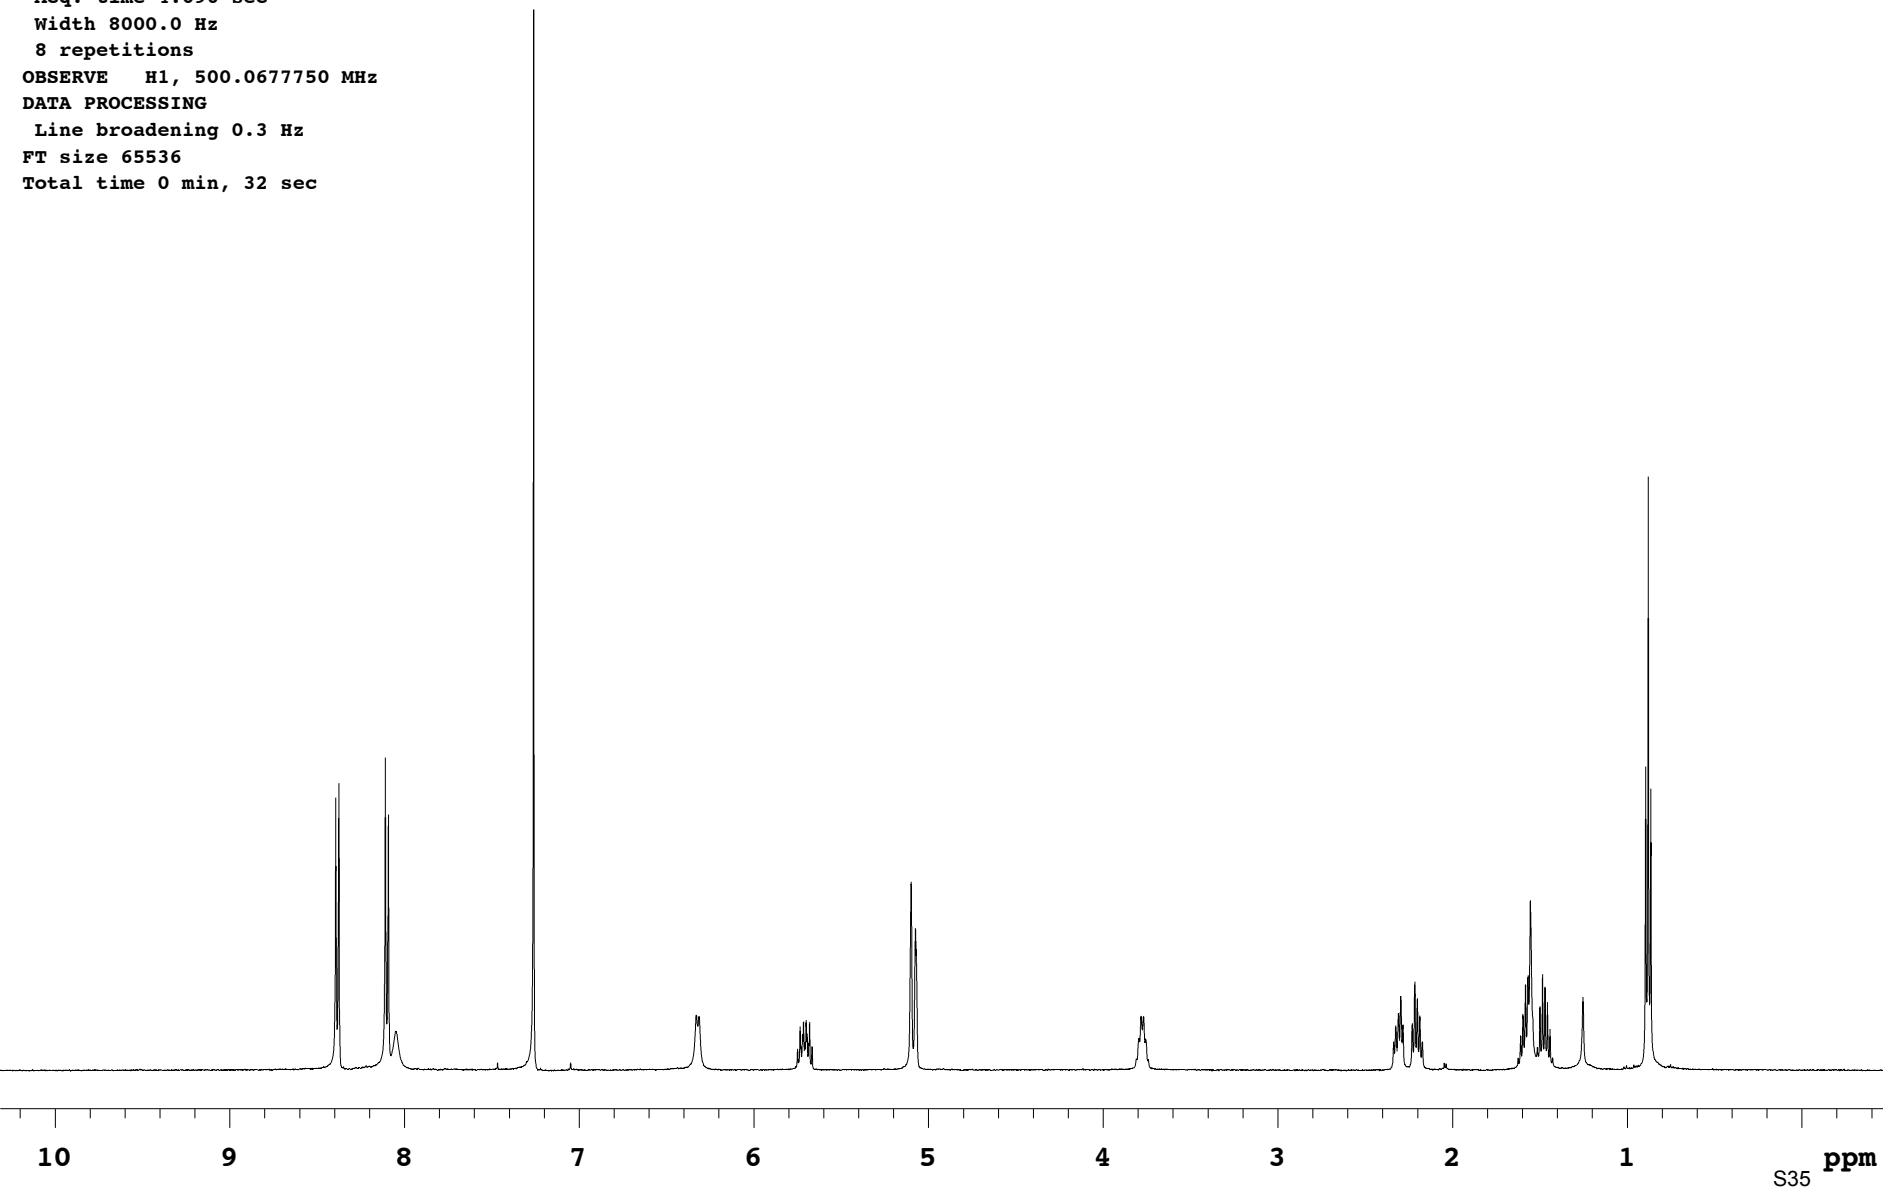

*Strambeanu and White*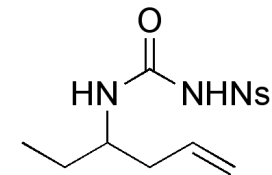

Pulse Sequence: s2pul

Solvent: CDCl3

Ambient temperature

User: 1-14-87

INOVA-500 "u500"

Relax. delay 1.000 sec

Pulse 28.1 degrees

Acq. time 1.086 sec

Width 30165.9 Hz

716 repetitions

OBSERVE C13, 125.6473175 MHz

DECOUPLE H1, 499.6923275 MHz

Power 45 dB

continuously on

WALTZ-16 modulated

DATA PROCESSING

Line broadening 1.0 Hz

FT size 65536

Total time 3 hr, 43 min, 31 sec

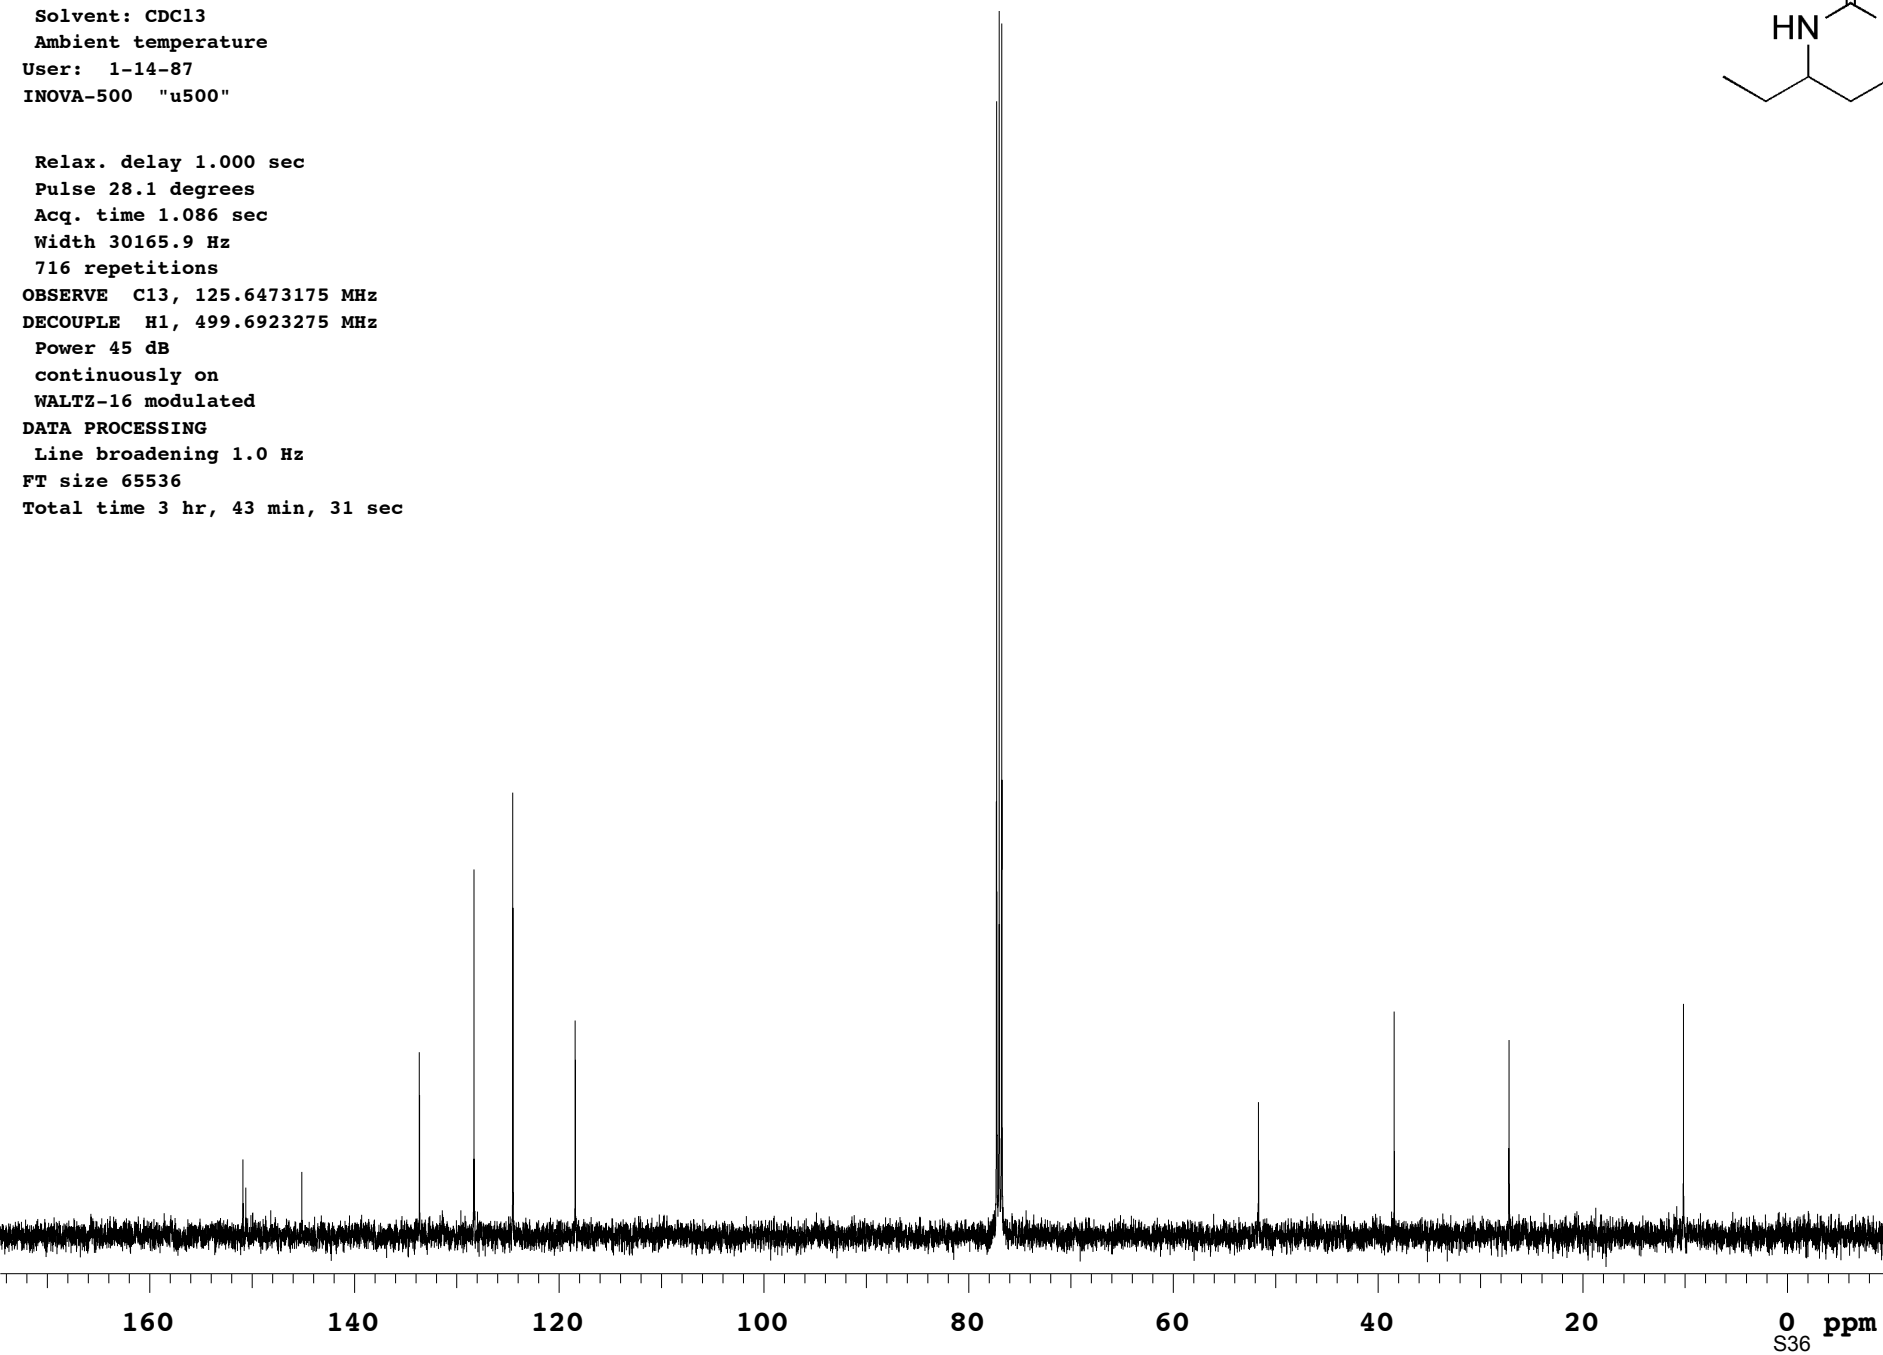

Pulse Sequence: s2pul

Solvent: CDCl<sub>3</sub>  
Ambient temperature  
File: iBu\_SM  
INOVA-500 "sunds1"

Relax. delay 10.000 sec  
Pulse 45.0 degrees  
Acq. time 4.096 sec  
Width 8000.0 Hz  
8 repetitions  
OBSERVE H1, 499.4299007 MHz  
DATA PROCESSING  
Line broadening 0.3 Hz  
FT size 65536  
Total time 15 min, 2 sec

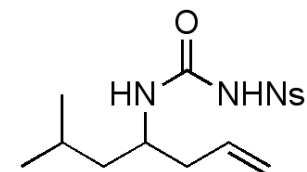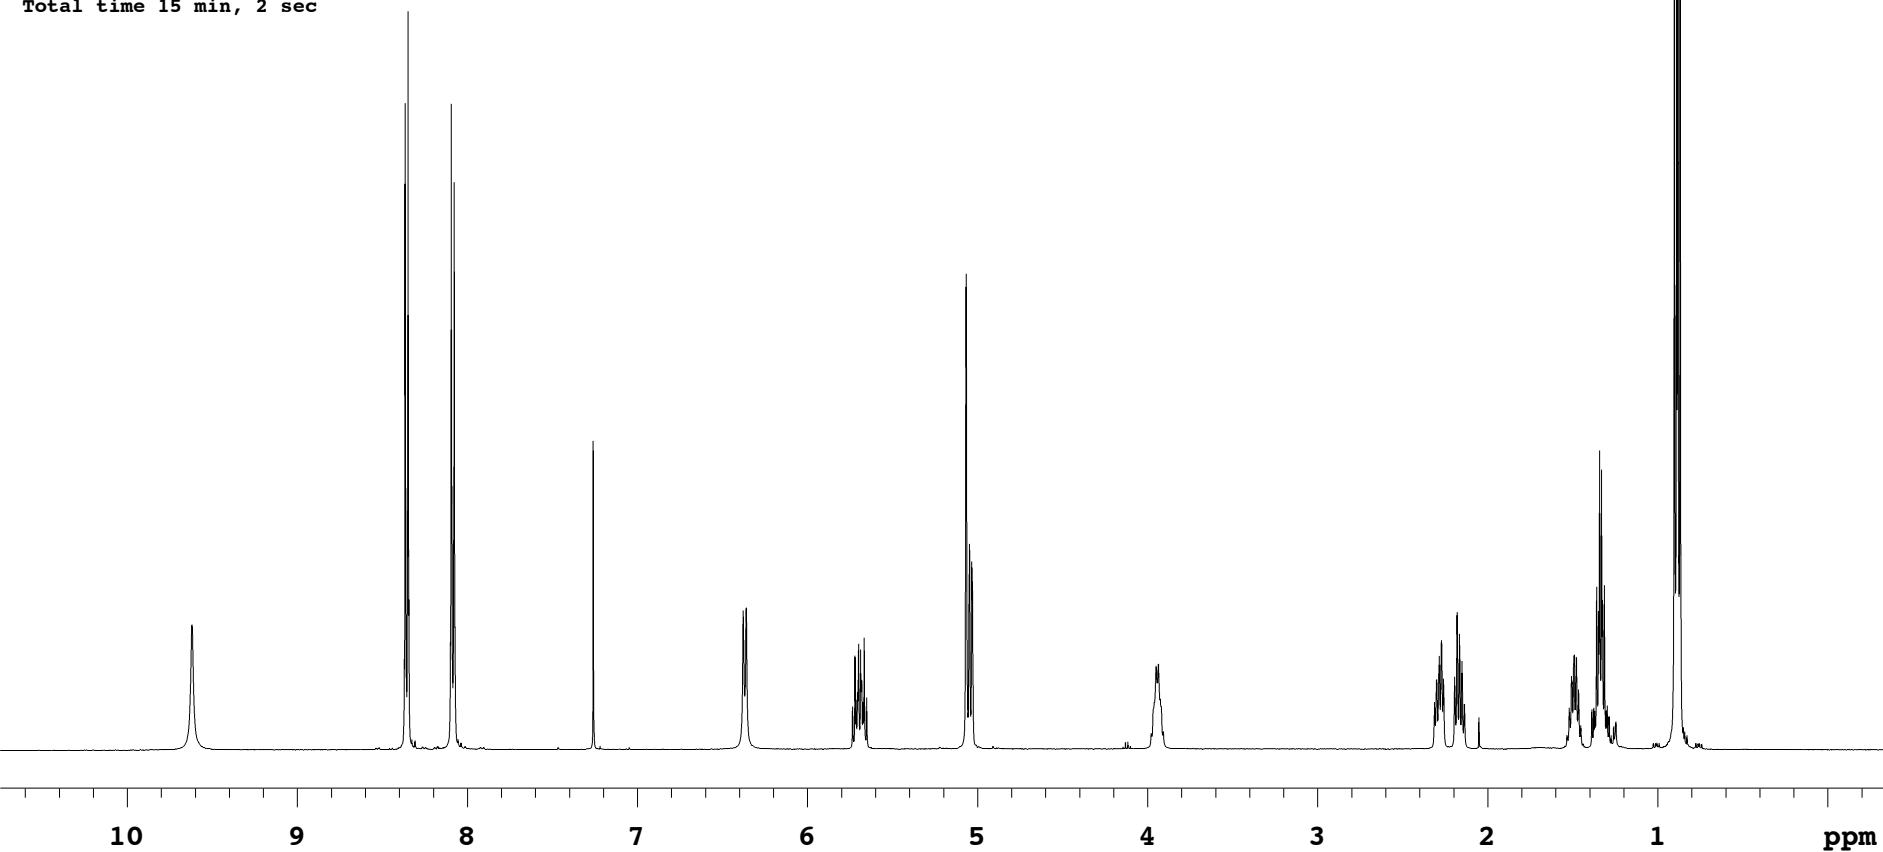

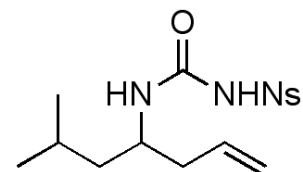

Pulse Sequence: s2pul

Solvent: CDCl3

Ambient temperature

User: 1-14-87

File: iBu\_SM\_C

INOVA-500 "sunds1"

Relax. delay 10.000 sec

Pulse 45.0 degrees

Acq. time 1.024 sec

Width 32000.0 Hz

370 repetitions

OBSERVE C13, 125.5817166 MHz

DECOUPLE H1, 499.4315638 MHz

Power 49 dB

continuously on

WALTZ-16 modulated

DATA PROCESSING

Line broadening 1.0 Hz

FT size 65536

Total time 12 hr, 33 min, 21 sec

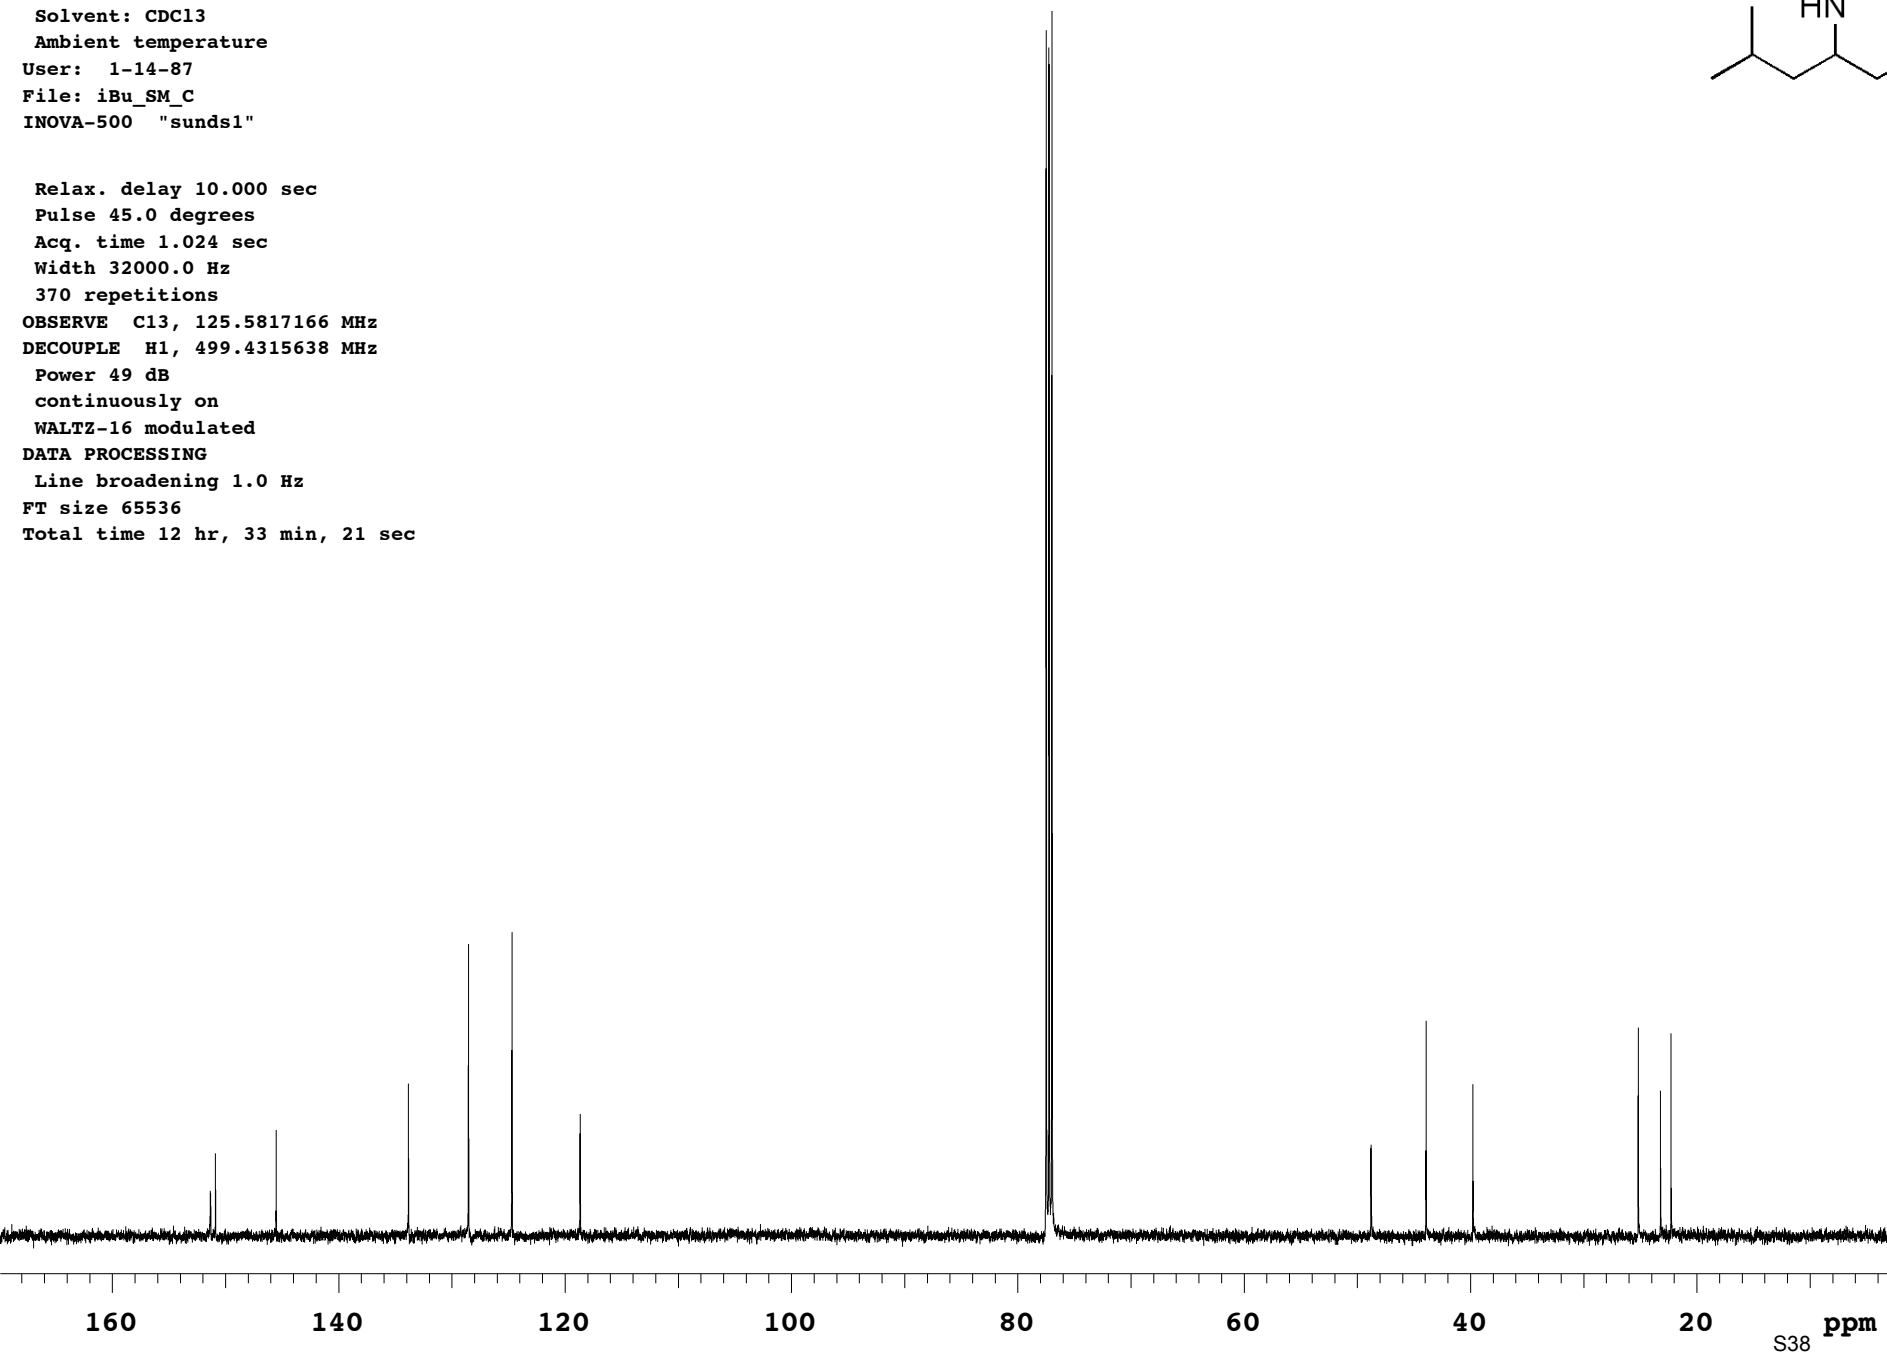

Pulse Sequence: s2pul

Solvent: CDCl3

Ambient temperature

File: tBu\_SM

INOVA-500 "sunds1"

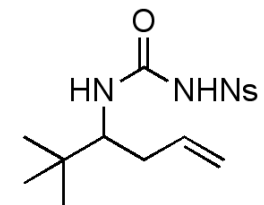

Relax. delay 10.000 sec

Pulse 45.0 degrees

Acq. time 4.096 sec

Width 8000.0 Hz

10 repetitions

OBSERVE H1, 499.4299002 MHz

DATA PROCESSING

Line broadening 0.3 Hz

FT size 65536

Total time 3 min, 45 sec

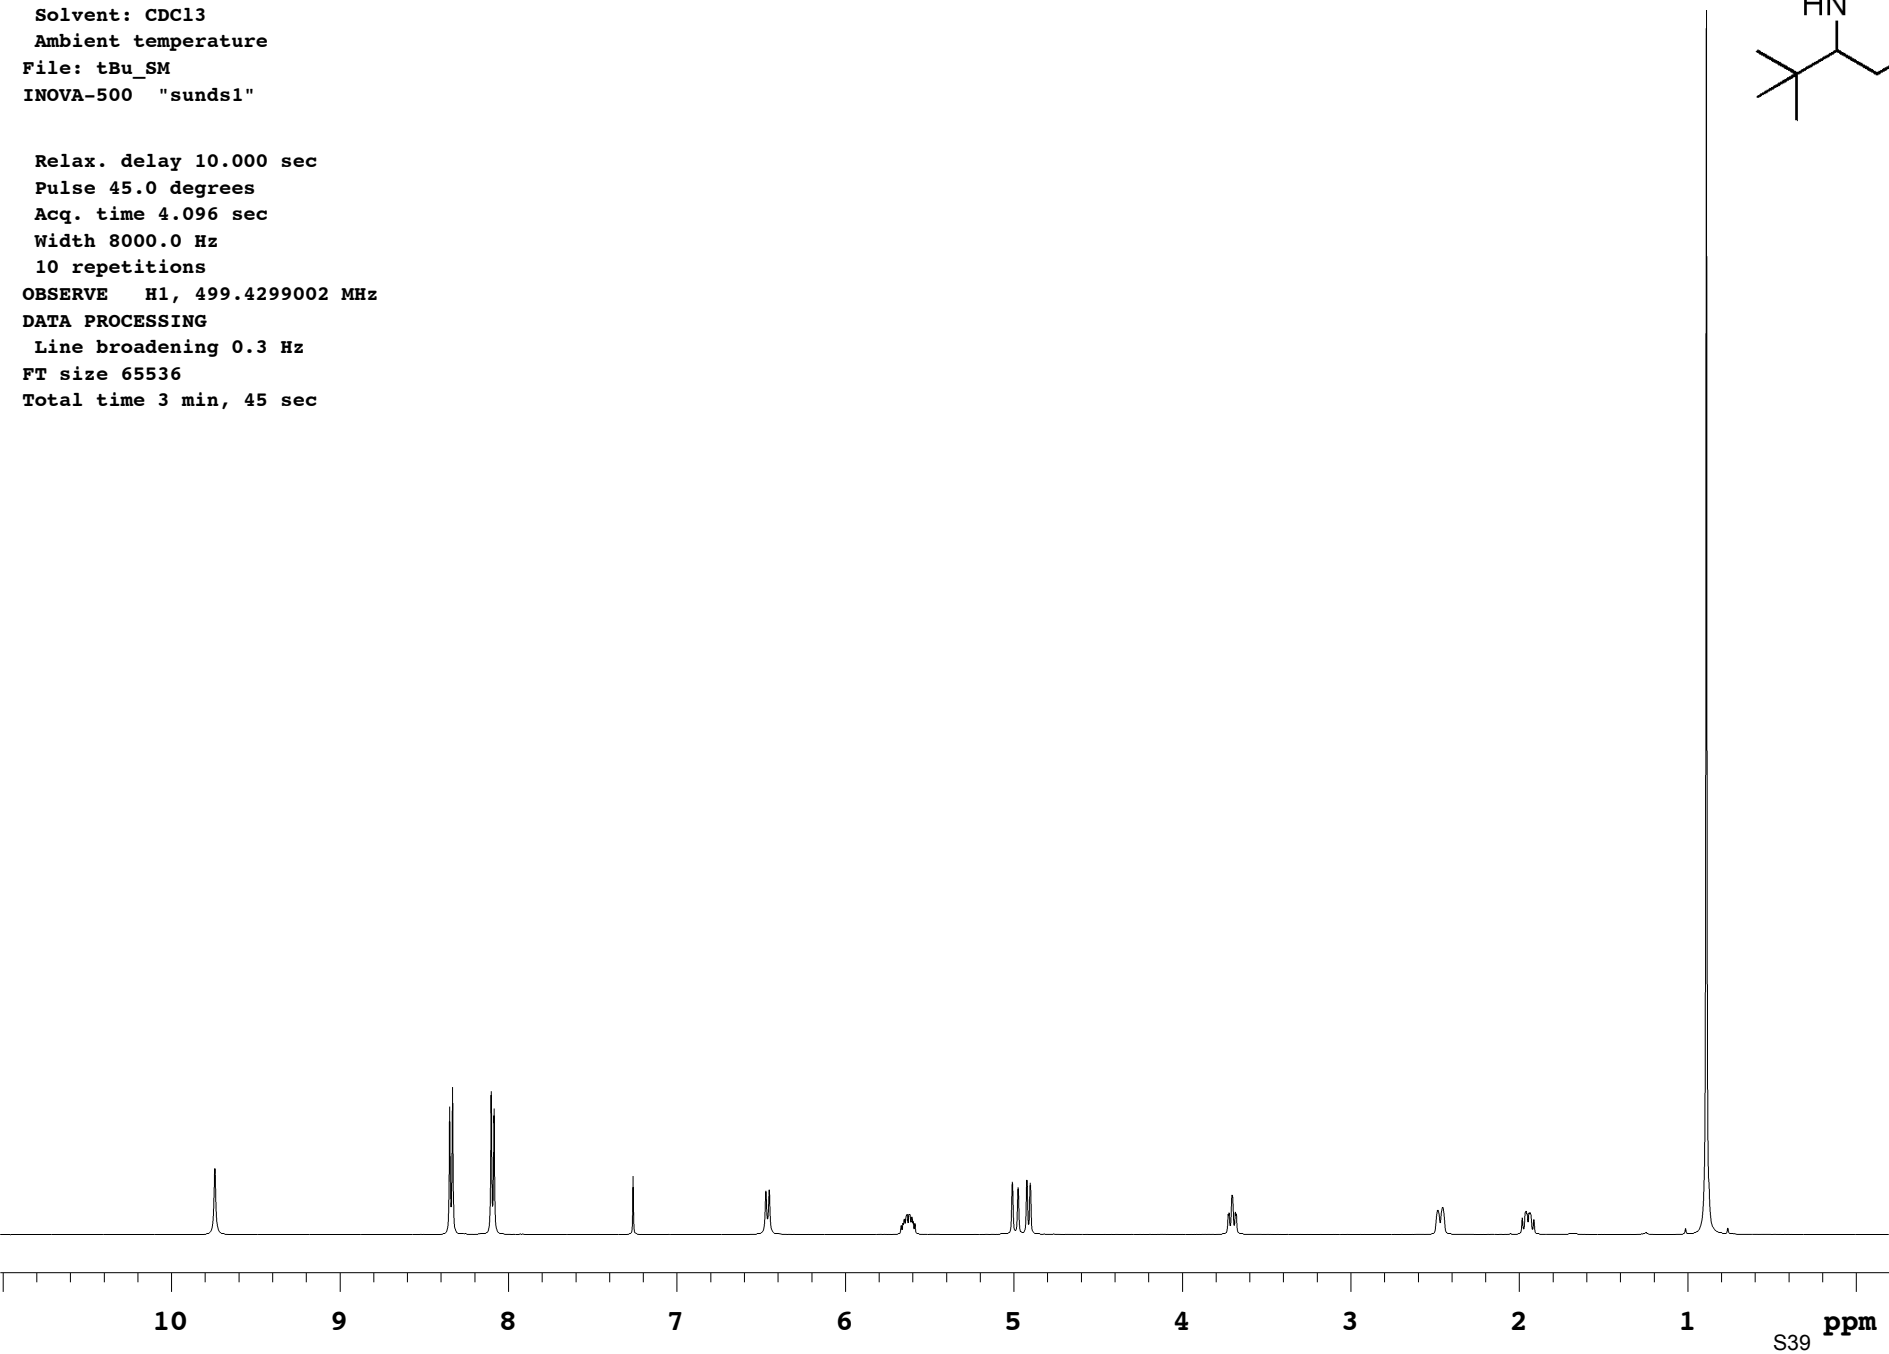

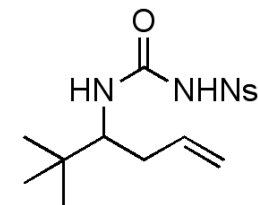

Pulse Sequence: s2pul

Solvent: CDCl3

Ambient temperature

User: 1-14-87

File: tBu\_SM\_C

INOVA-500 "sunds1"

Relax. delay 10.000 sec

Pulse 45.0 degrees

Acq. time 1.024 sec

Width 32000.0 Hz

304 repetitions

OBSERVE C13, 125.5817166 MHz

DECOUPLE H1, 499.4315638 MHz

Power 49 dB

continuously on

WALTZ-16 modulated

DATA PROCESSING

Line broadening 1.0 Hz

FT size 65536

Total time 3 hr, 8 min, 28 sec

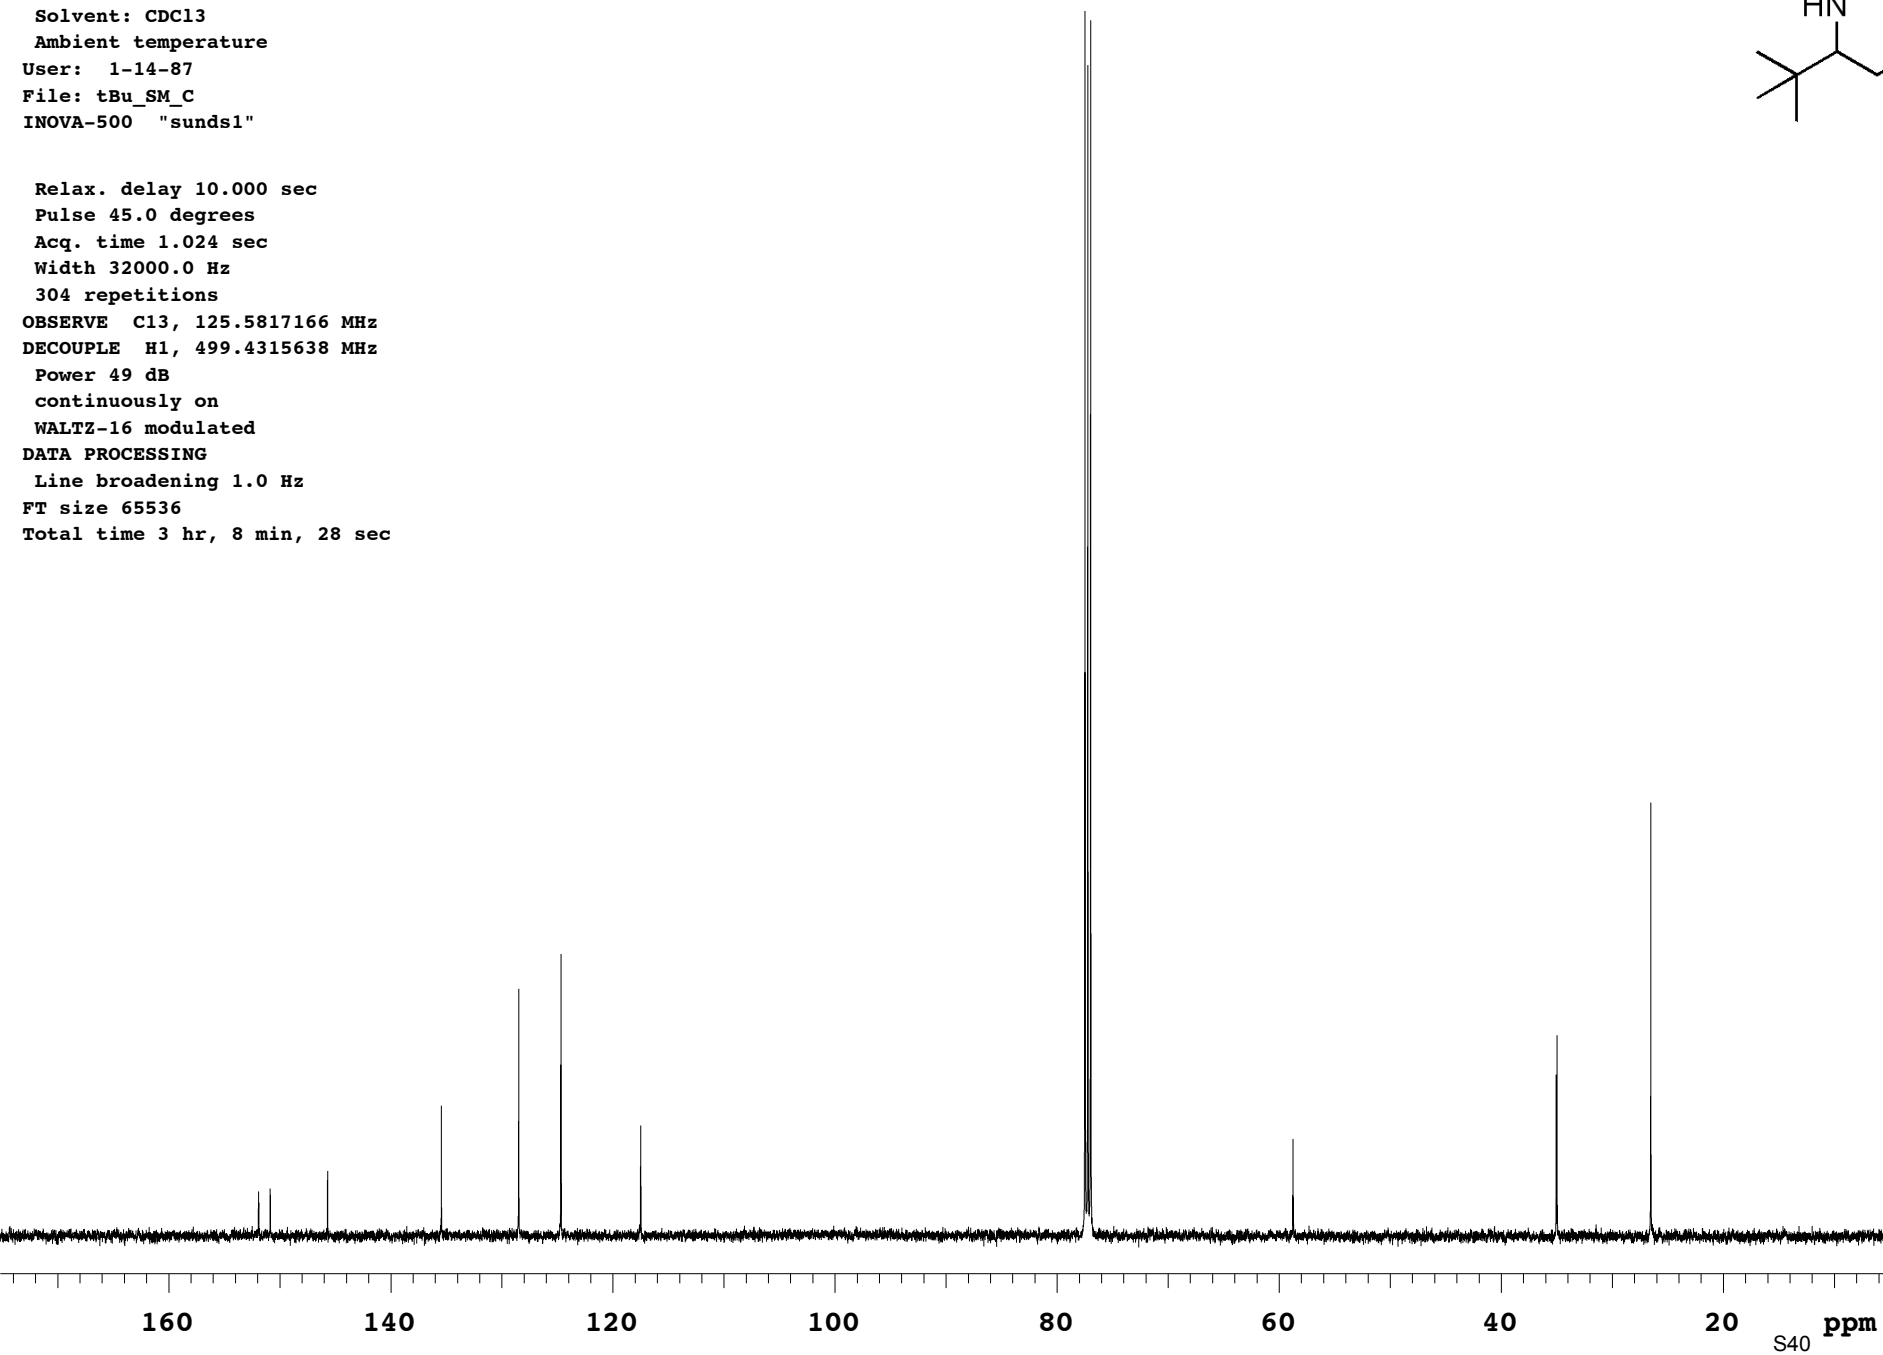

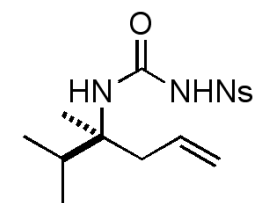

Pulse Sequence: s2pul

Solvent: CDCl<sub>3</sub>

Ambient temperature

File: quat\_SM

INOVA-500 "sunds1"

Relax. delay 5.000 sec

Pulse 90.0 degrees

Acq. time 4.096 sec

Width 8000.0 Hz

12 repetitions

OBSERVE H1, 500.0677753 MHz

DATA PROCESSING

Line broadening 0.3 Hz

FT size 65536

Total time 9 min, 42 sec

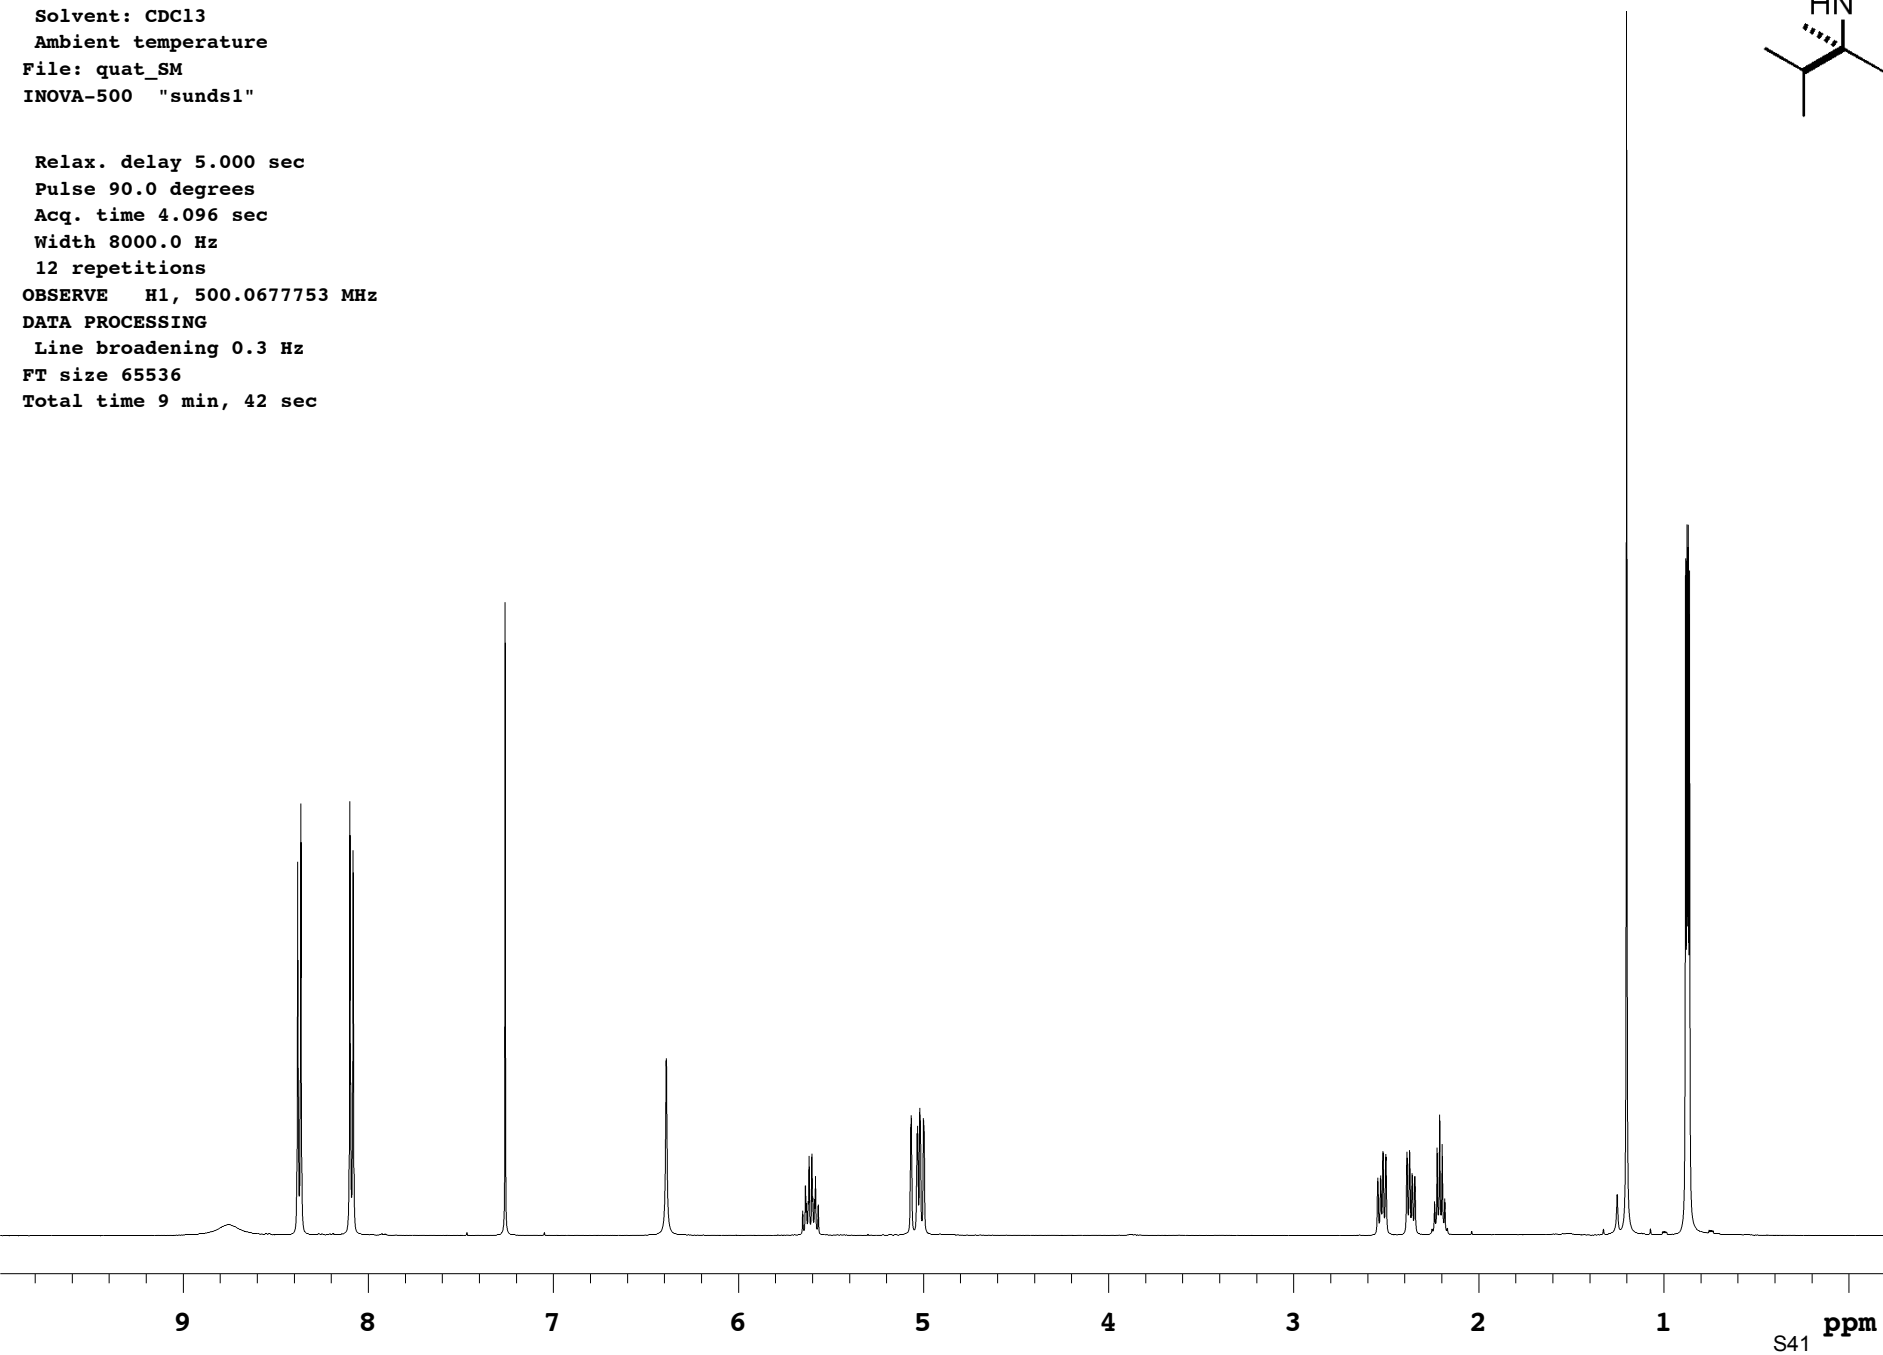





Pulse Sequence: s2pul

Solvent: CDCl<sub>3</sub>

Ambient temperature

User: 1-14-87

File: quat\_SM\_C

INOVA-500 "sunds1"

Relax. delay 5.000 sec

Pulse 65.9 degrees

Acq. time 1.086 sec

Width 30165.9 Hz

726 repetitions

OBSERVE C13, 125.6472855 MHz

DECOUPLE H1, 499.6923275 MHz

Power 44 dB

continuously on

WALTZ-16 modulated

DATA PROCESSING

Line broadening 1.0 Hz

FT size 65536

Total time 3 hr, 28 min, 8 sec

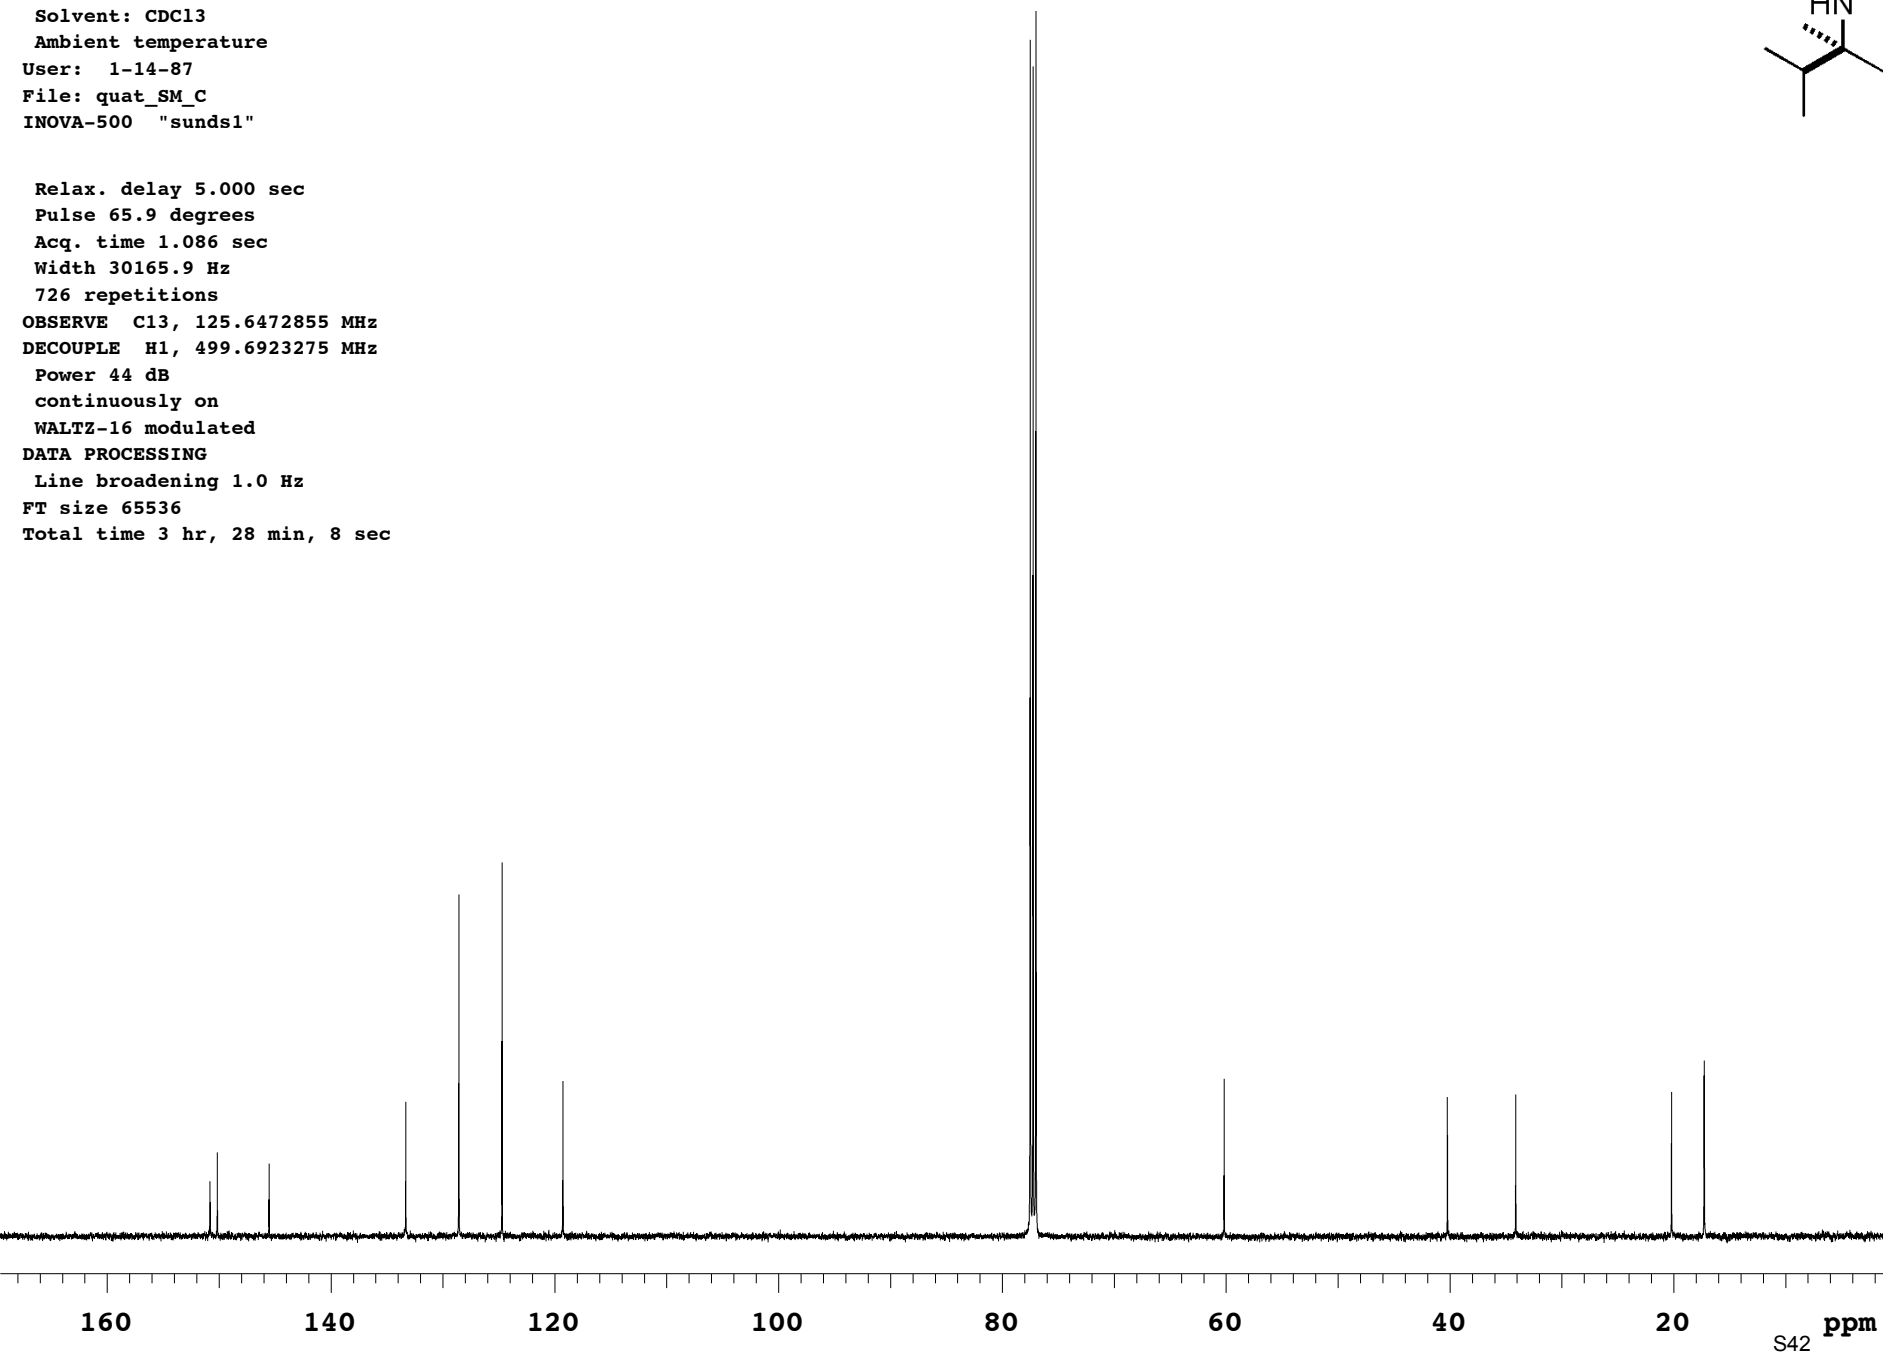

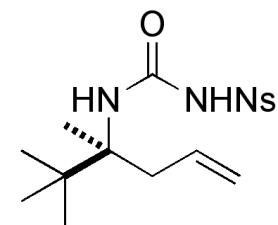

Pulse Sequence: s2pul

Solvent: CDCl<sub>3</sub>

Ambient temperature

File: IIS.88.IX

INOVA-500 "sunds1"

Relax. delay 5.000 sec

Pulse 90.0 degrees

Acq. time 4.096 sec

Width 8000.0 Hz

6 repetitions

OBSERVE H1, 500.0677750 MHz

DATA PROCESSING

Line broadening 0.3 Hz

FT size 65536

Total time 1 min, 12 sec

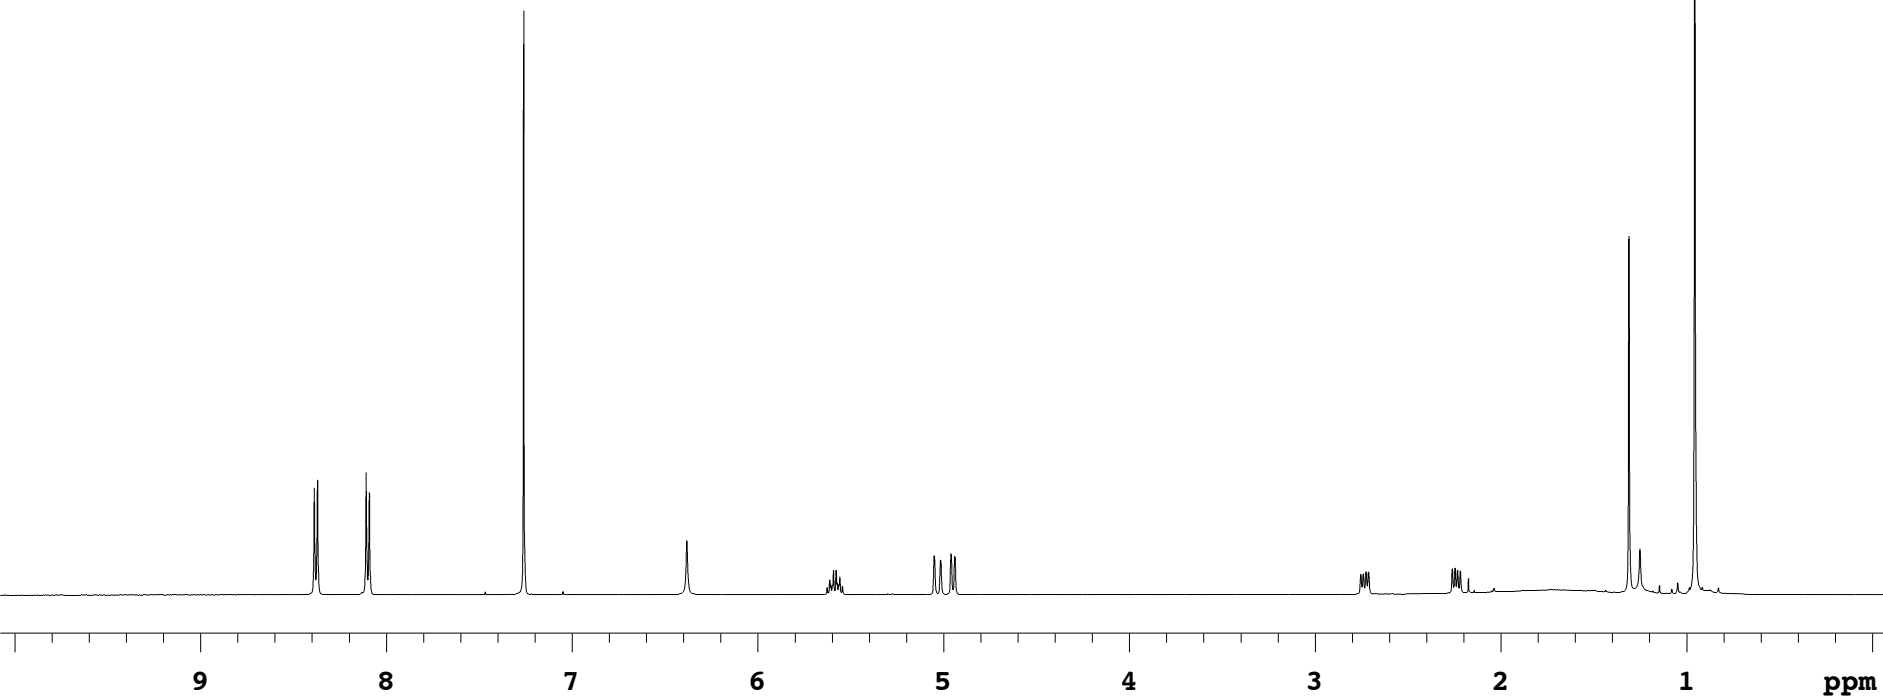

Pulse Sequence: s2pul

Solvent: CDCl<sub>3</sub>

Ambient temperature

User: 1-14-87

INOVA-500 "vxr500"

Relax. delay 1.000 sec

Pulse 45.0 degrees

Acq. time 1.024 sec

Width 32000.0 Hz

942 repetitions

OBSERVE C13, 125.5817473 MHz

DECOUPLE H1, 499.4315638 MHz

Power 47 dB

continuously on

WALTZ-16 modulated

DATA PROCESSING

Line broadening 1.0 Hz

FT size 65536

Total time 3 hr, 36 min, 52 sec

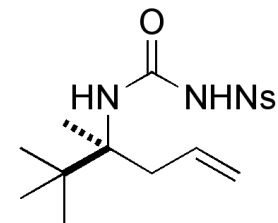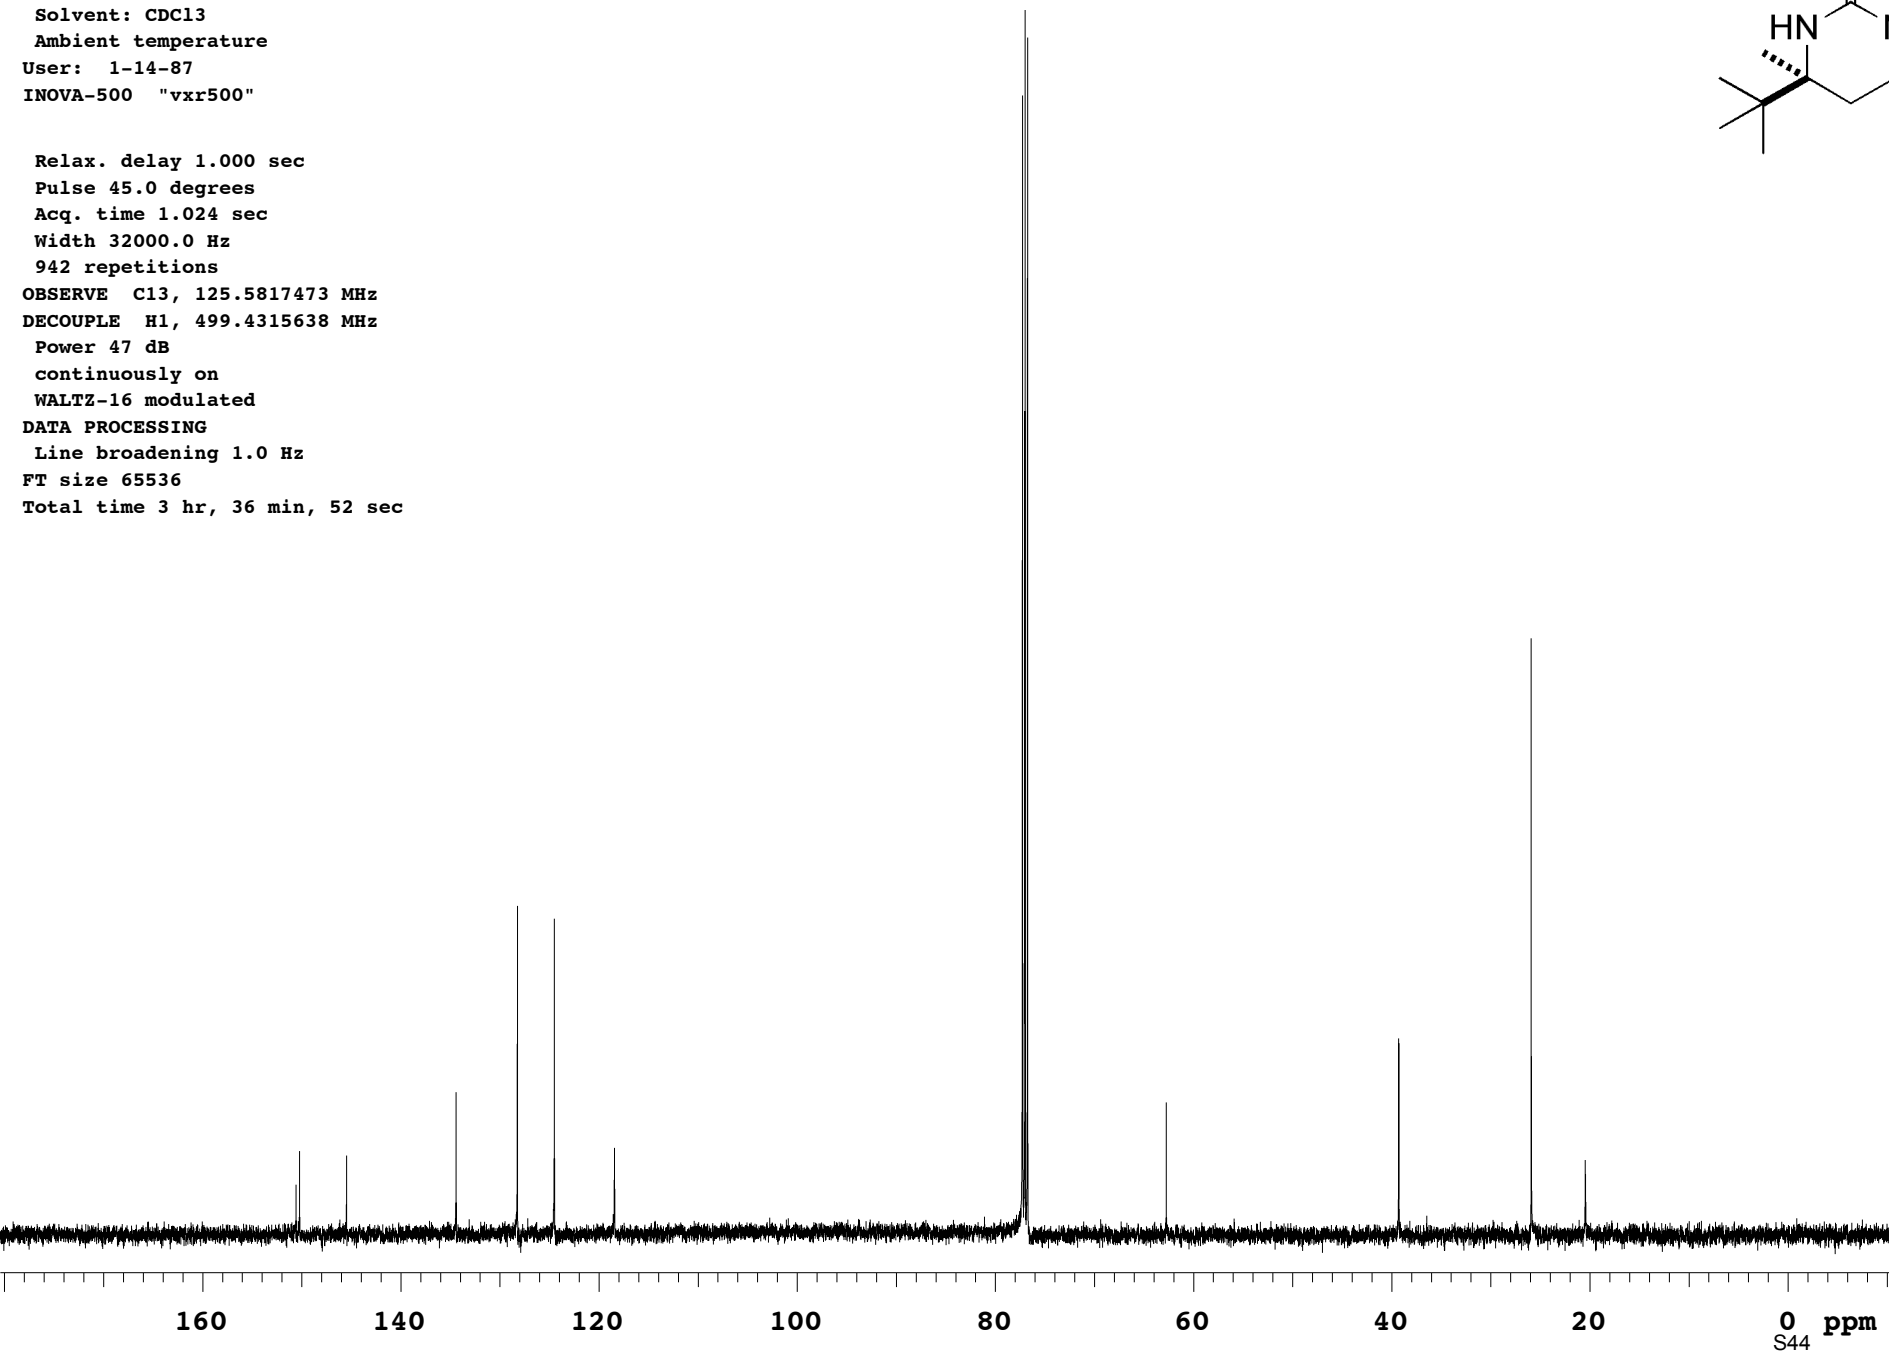

## Strambeanu and White

Pulse Sequence: s2pul

Solvent: CDCl3

Ambient temperature

INOVA-500 "ui500nb"

Pulse 90.0 degrees

Acq. time 4.096 sec

Width 8000.0 Hz

8 repetitions

OBSERVE H1, 500.0677750 MHz

DATA PROCESSING

Line broadening 0.3 Hz

FT size 65536

Total time 0 min, 32 sec

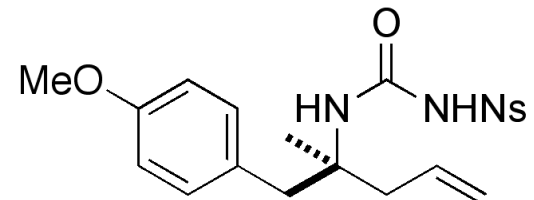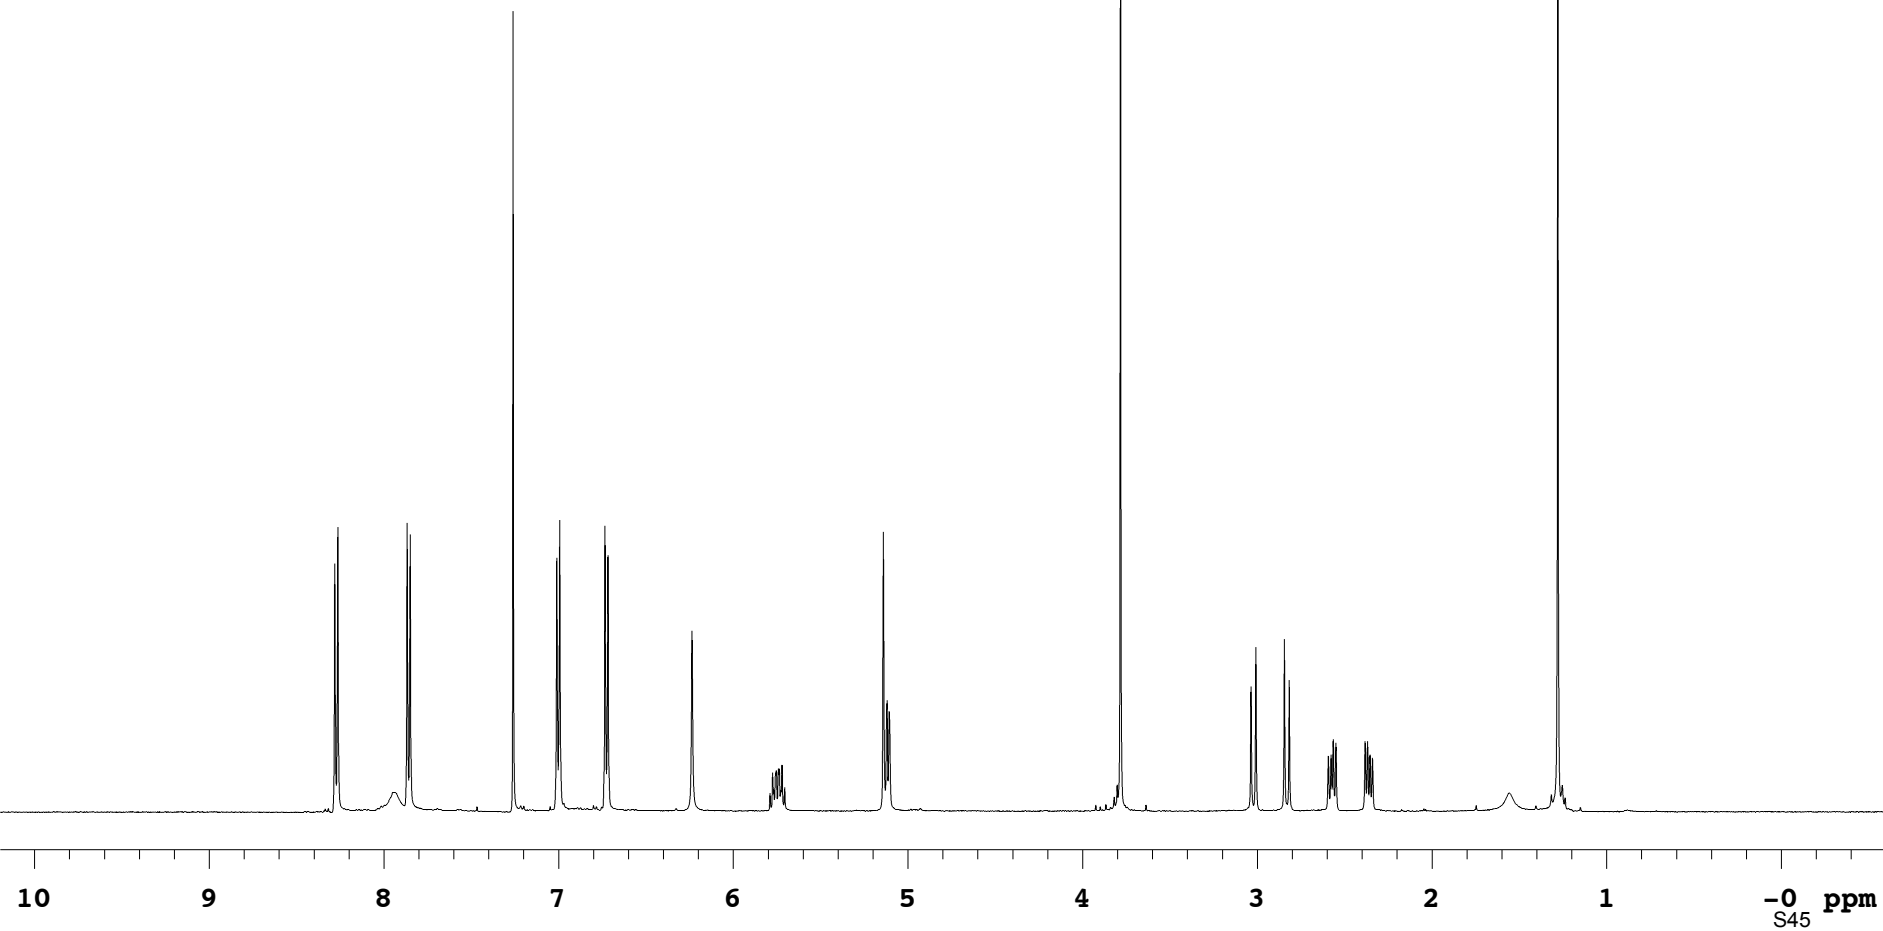

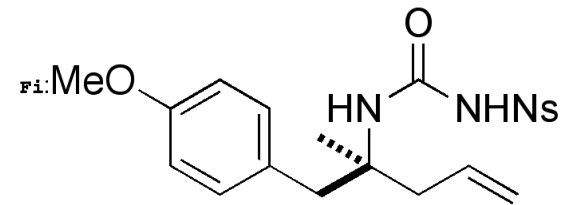

STANDARD CARBON PARAMETERS

Pulse Sequence: s2pul

Solvent: CDCl3  
 Ambient temperature  
 User: 1-14-87  
 INOVA-500 "u500"

Relax. delay 1.000 sec  
 Pulse 28.1 degrees  
 Acq. time 1.086 sec  
 Width 30165.9 Hz  
 906 repetitions  
 OBSERVE C13, 125.6473166 MHz  
 DECOUPLE H1, 499.6923275 MHz  
 Power 45 dB  
 continuously on  
 WALTZ-16 modulated

DATA PROCESSING

Line broadening 1.0 Hz  
 FT size 65536  
 Total time 3 hr, 43 min, 31 sec

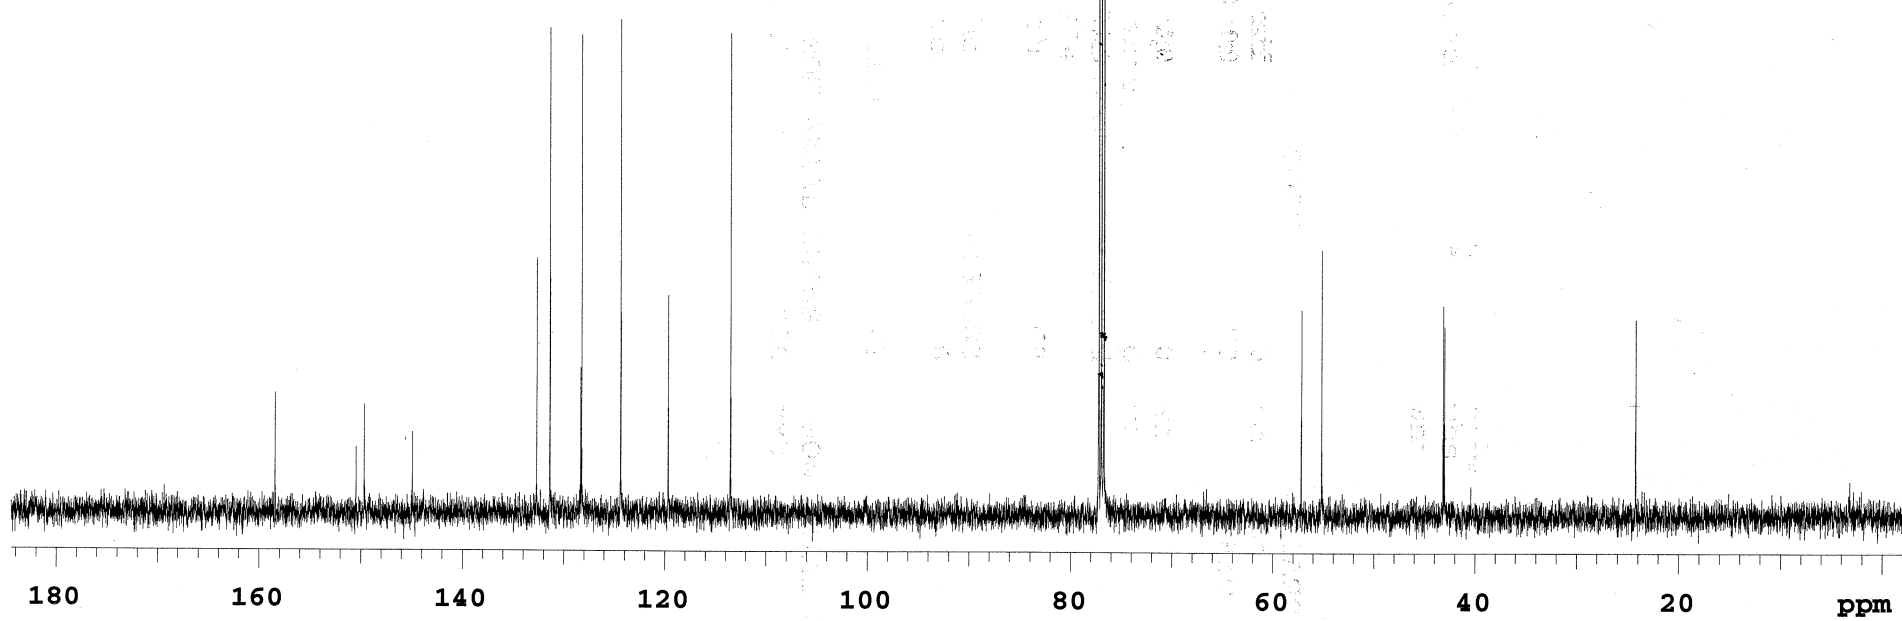

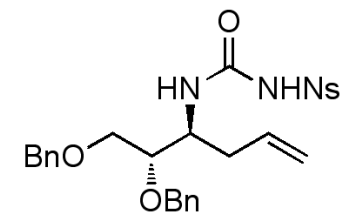

Pulse Sequence: s2pul

Solvent: CDCl<sub>3</sub>

Ambient temperature

File: OBn\_anti\_SM

INOVA-500 "sunds1"

Relax. delay 10.000 sec

Pulse 45.0 degrees

Acq. time 4.096 sec

Width 8000.0 Hz

64 repetitions

OBSERVE H1, 499.4298935 MHz

DATA PROCESSING

Line broadening 0.3 Hz

FT size 65536

Total time 15 min, 2 sec

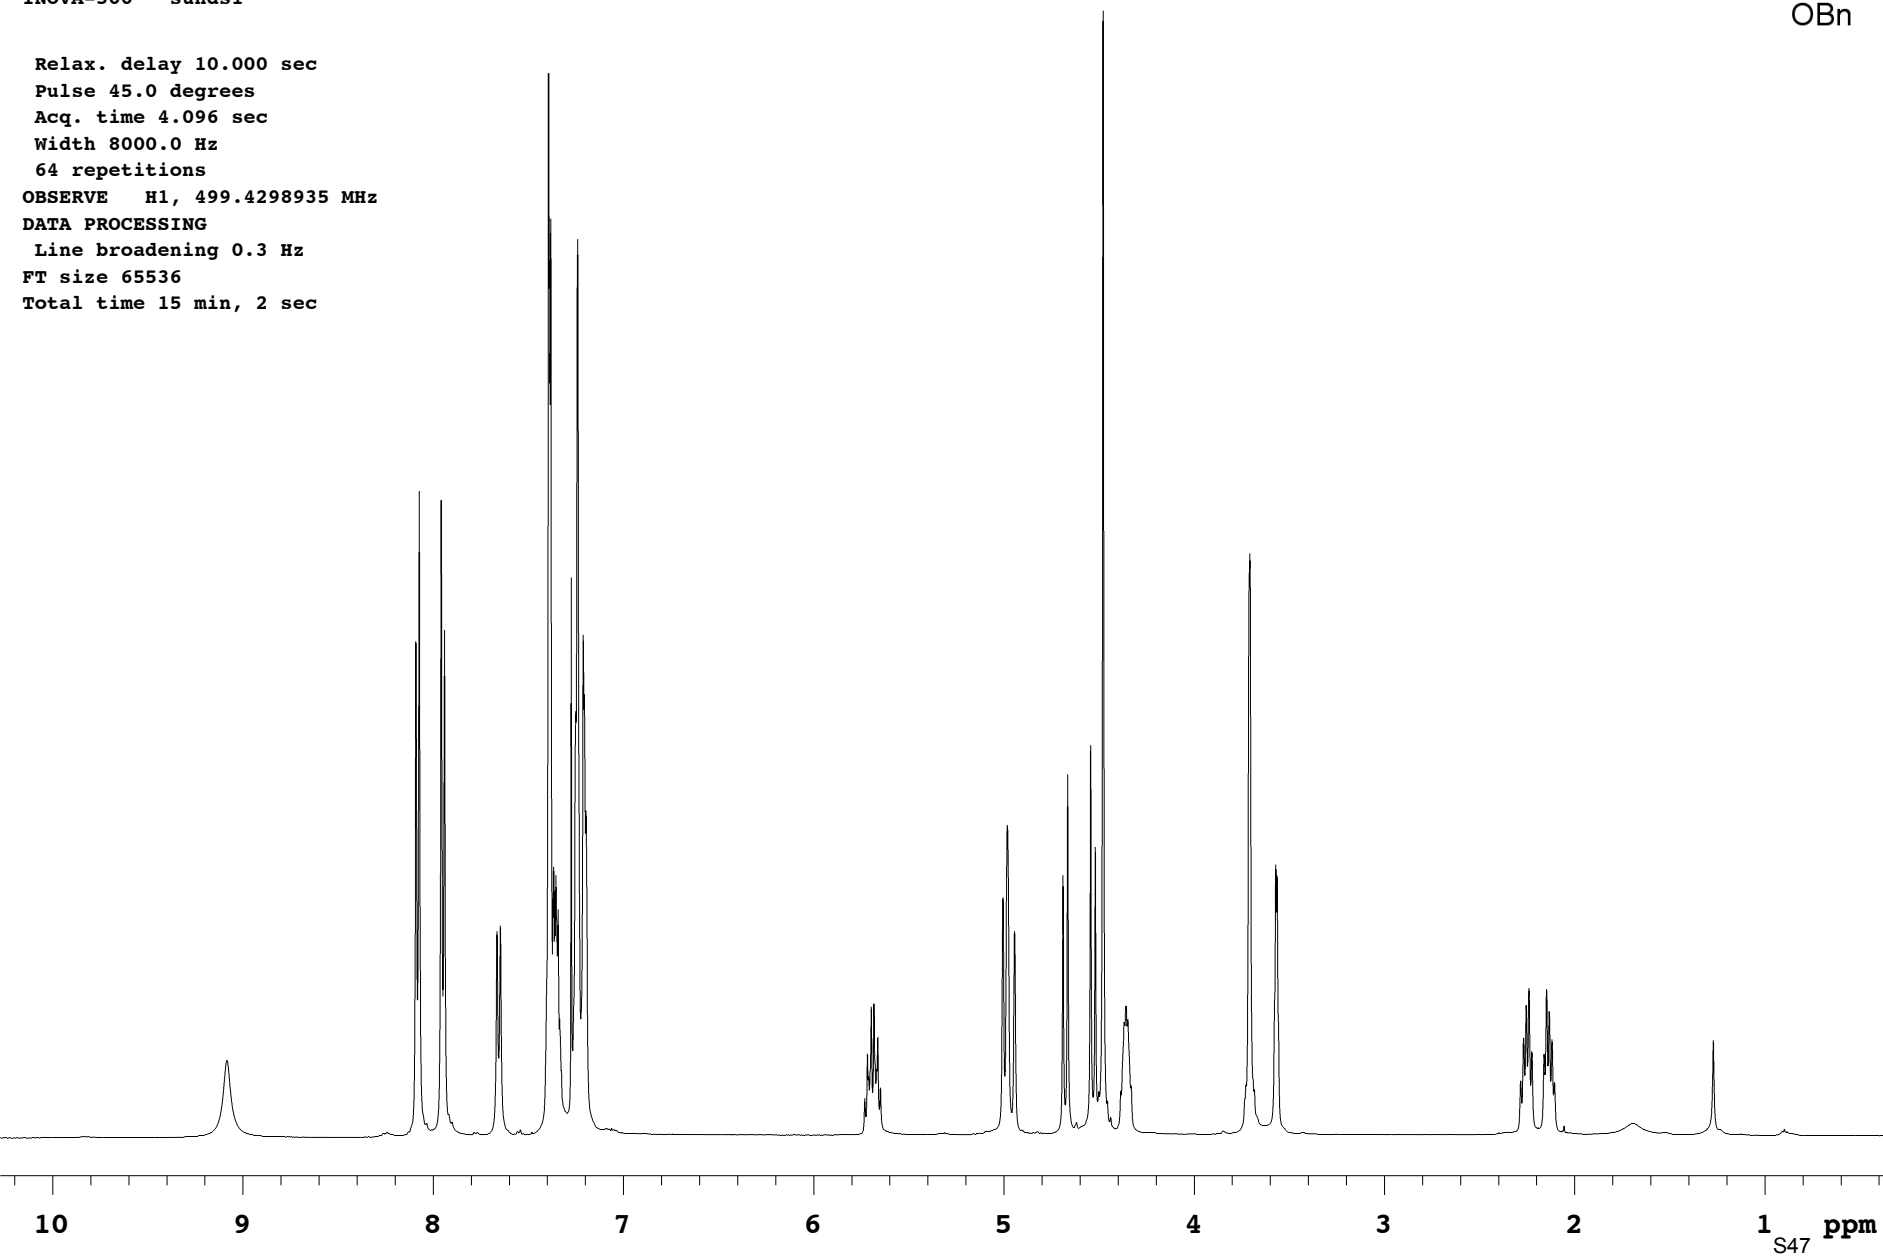

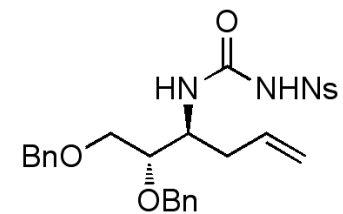

Pulse Sequence: s2pul

Solvent: CDCl<sub>3</sub>

Temp. 20.0 C / 293.1 K

User: 1-14-87

File: OBn\_anti\_SM\_C

INOVA-500 "sunds1"

Relax. delay 5.000 sec

Pulse 65.9 degrees

Acq. time 1.086 sec

Width 30165.9 Hz

1200 repetitions

OBSERVE C13, 125.6472855 MHz

DECOUPLE H1, 499.6923275 MHz

Power 44 dB

continuously on

WALTZ-16 modulated

DATA PROCESSING

Line broadening 1.0 Hz

FT size 65536

Total time 2 hr, 32 min, 28 sec

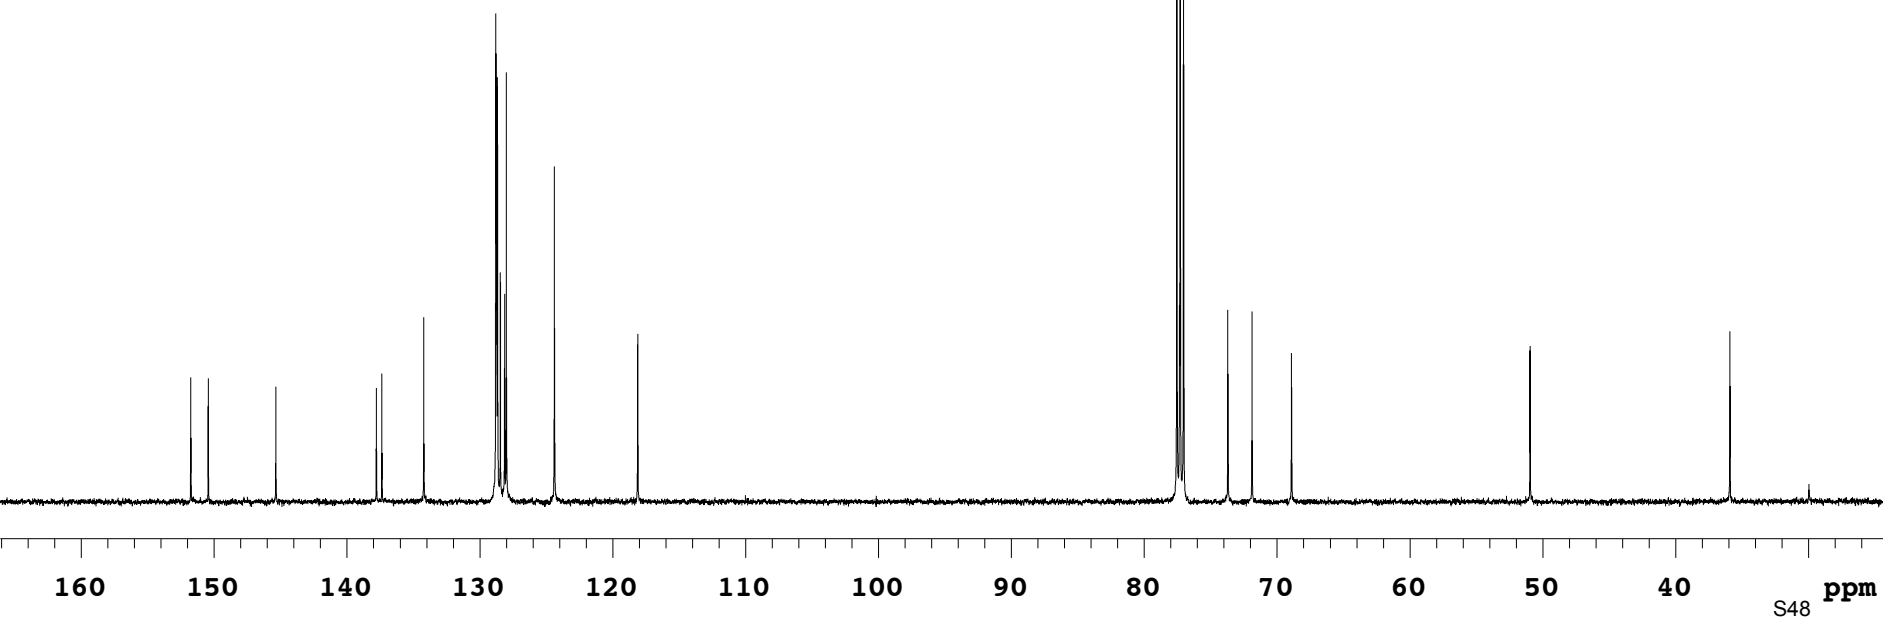

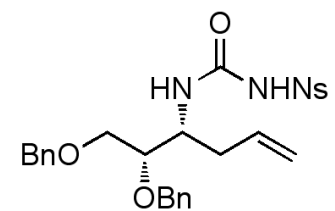

Pulse Sequence: s2pul

Solvent: CDCl3

Ambient temperature

File: OBn\_syn\_SM1

INOVA-500 "sunds1"

Relax. delay 5.000 sec

Pulse 90.0 degrees

Acq. time 4.096 sec

Width 8000.0 Hz

16 repetitions

OBSERVE H1, 500.0677760 MHz

DATA PROCESSING

Line broadening 0.3 Hz

FT size 65536

Total time 2 min, 25 sec

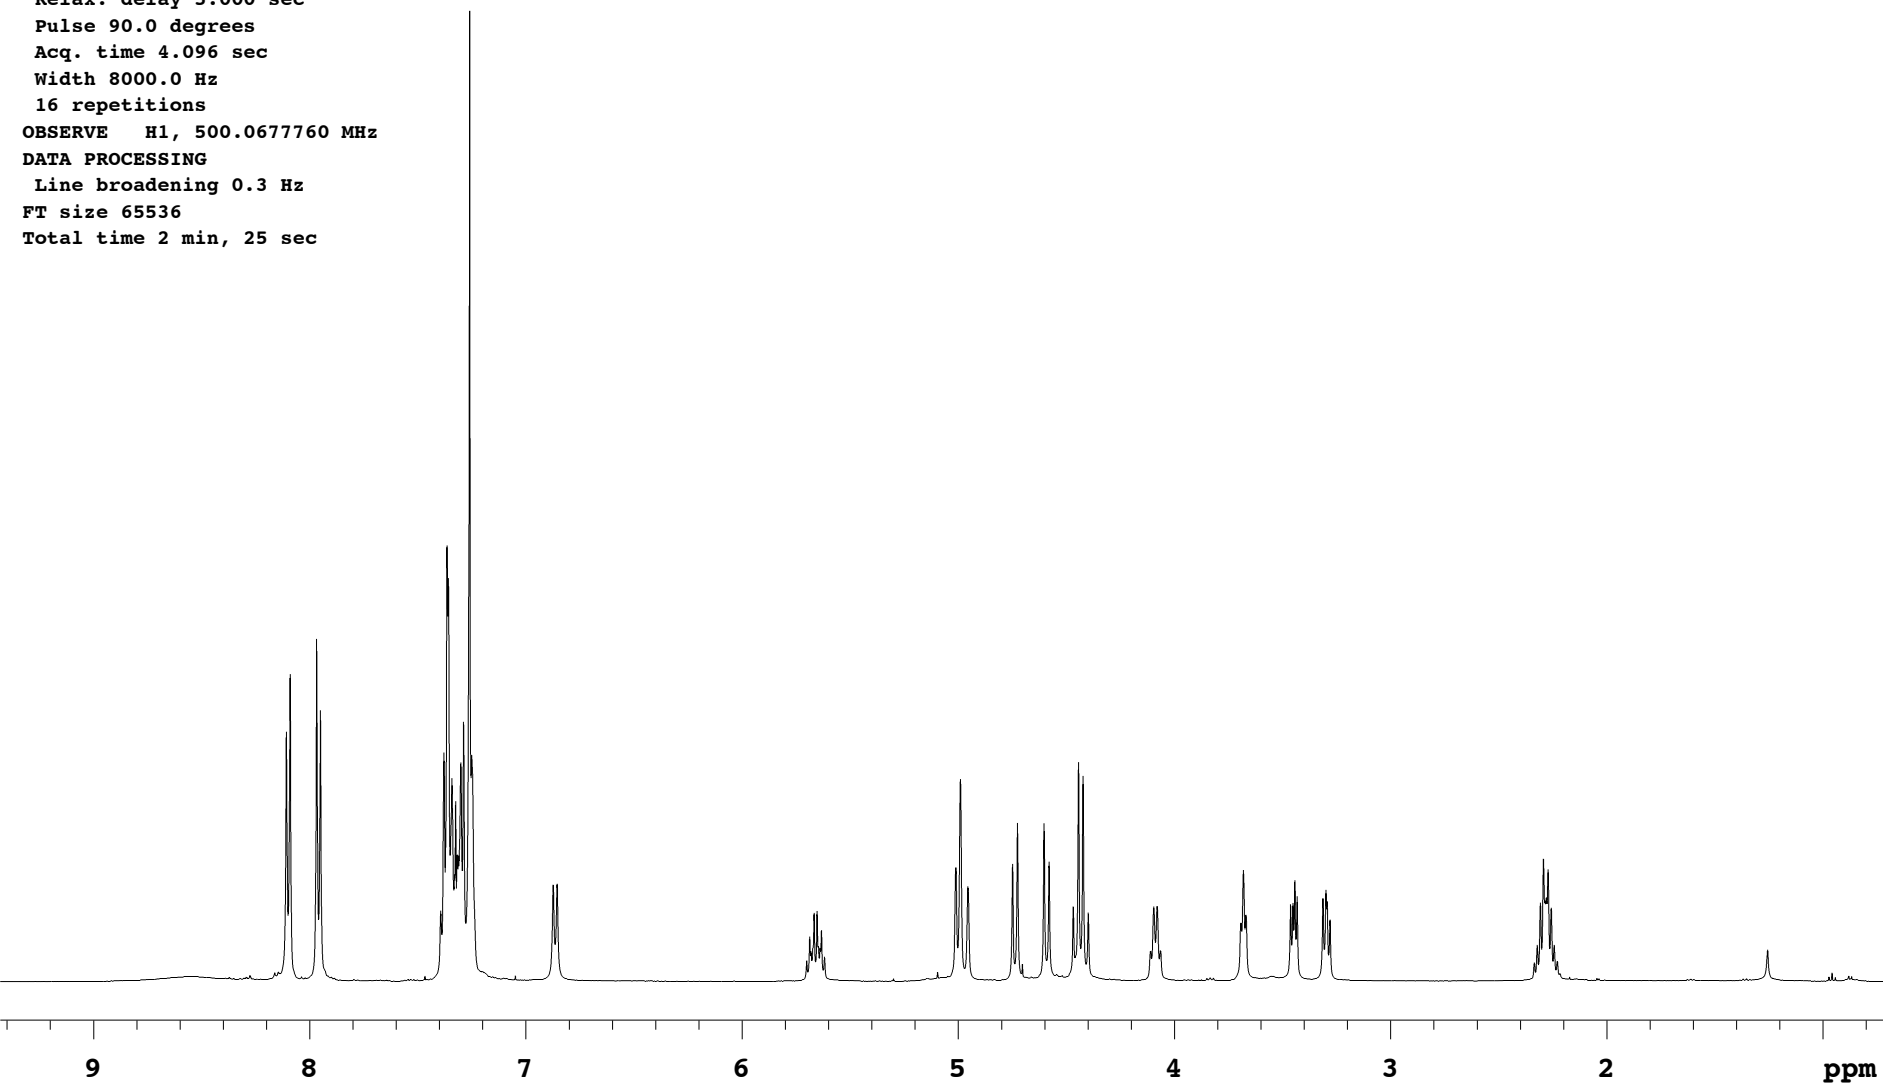



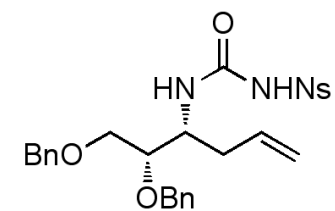

Pulse Sequence: s2pul

Solvent: CDCl<sub>3</sub>

Ambient temperature

User: 1-14-87

File: OBn\_syn\_SM\_C

INOVA-500 "sunds1"

Relax. delay 5.000 sec

Pulse 65.9 degrees

Acq. time 1.086 sec

Width 30165.9 Hz

428 repetitions

OBSERVE C13, 125.6472855 MHz

DECOUPLE H1, 499.6923275 MHz

Power 44 dB

continuously on

WALTZ-16 modulated

DATA PROCESSING

Line broadening 1.0 Hz

FT size 65536

Total time 2 hr, 32 min, 28 sec

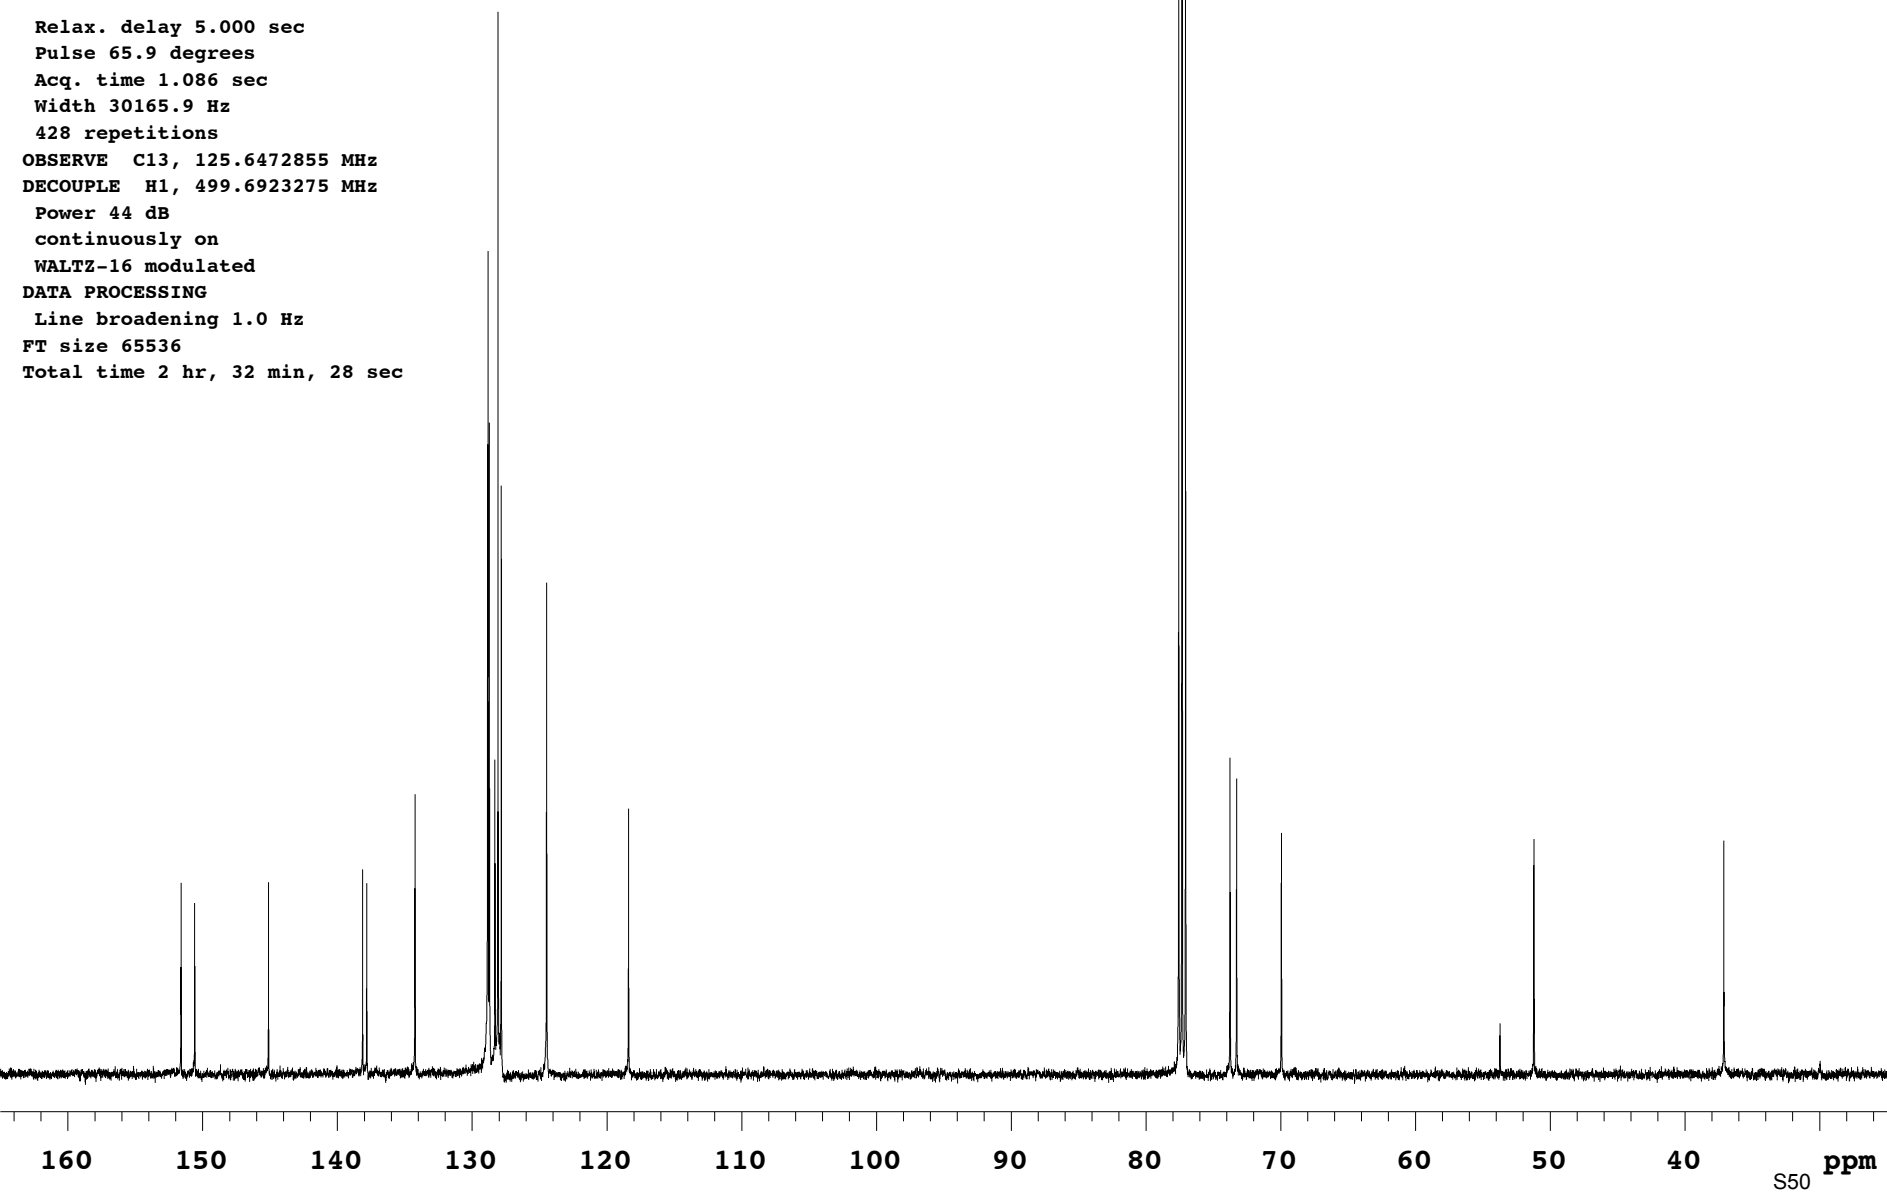

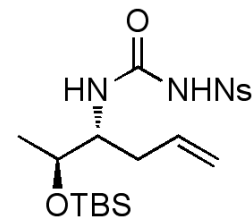

Pulse Sequence: s2pul

Solvent: CDCl3

Ambient temperature

File: OTBSAntiUrea

INOVA-500 "sunds1"

Relax. delay 10.000 sec

Pulse 61.6 degrees

Acq. time 4.665 sec

Width 7024.9 Hz

12 repetitions

OBSERVE H1, 499.6906572 MHz

DATA PROCESSING

Line broadening 0.3 Hz

FT size 65536

Total time 3 min, 54 sec

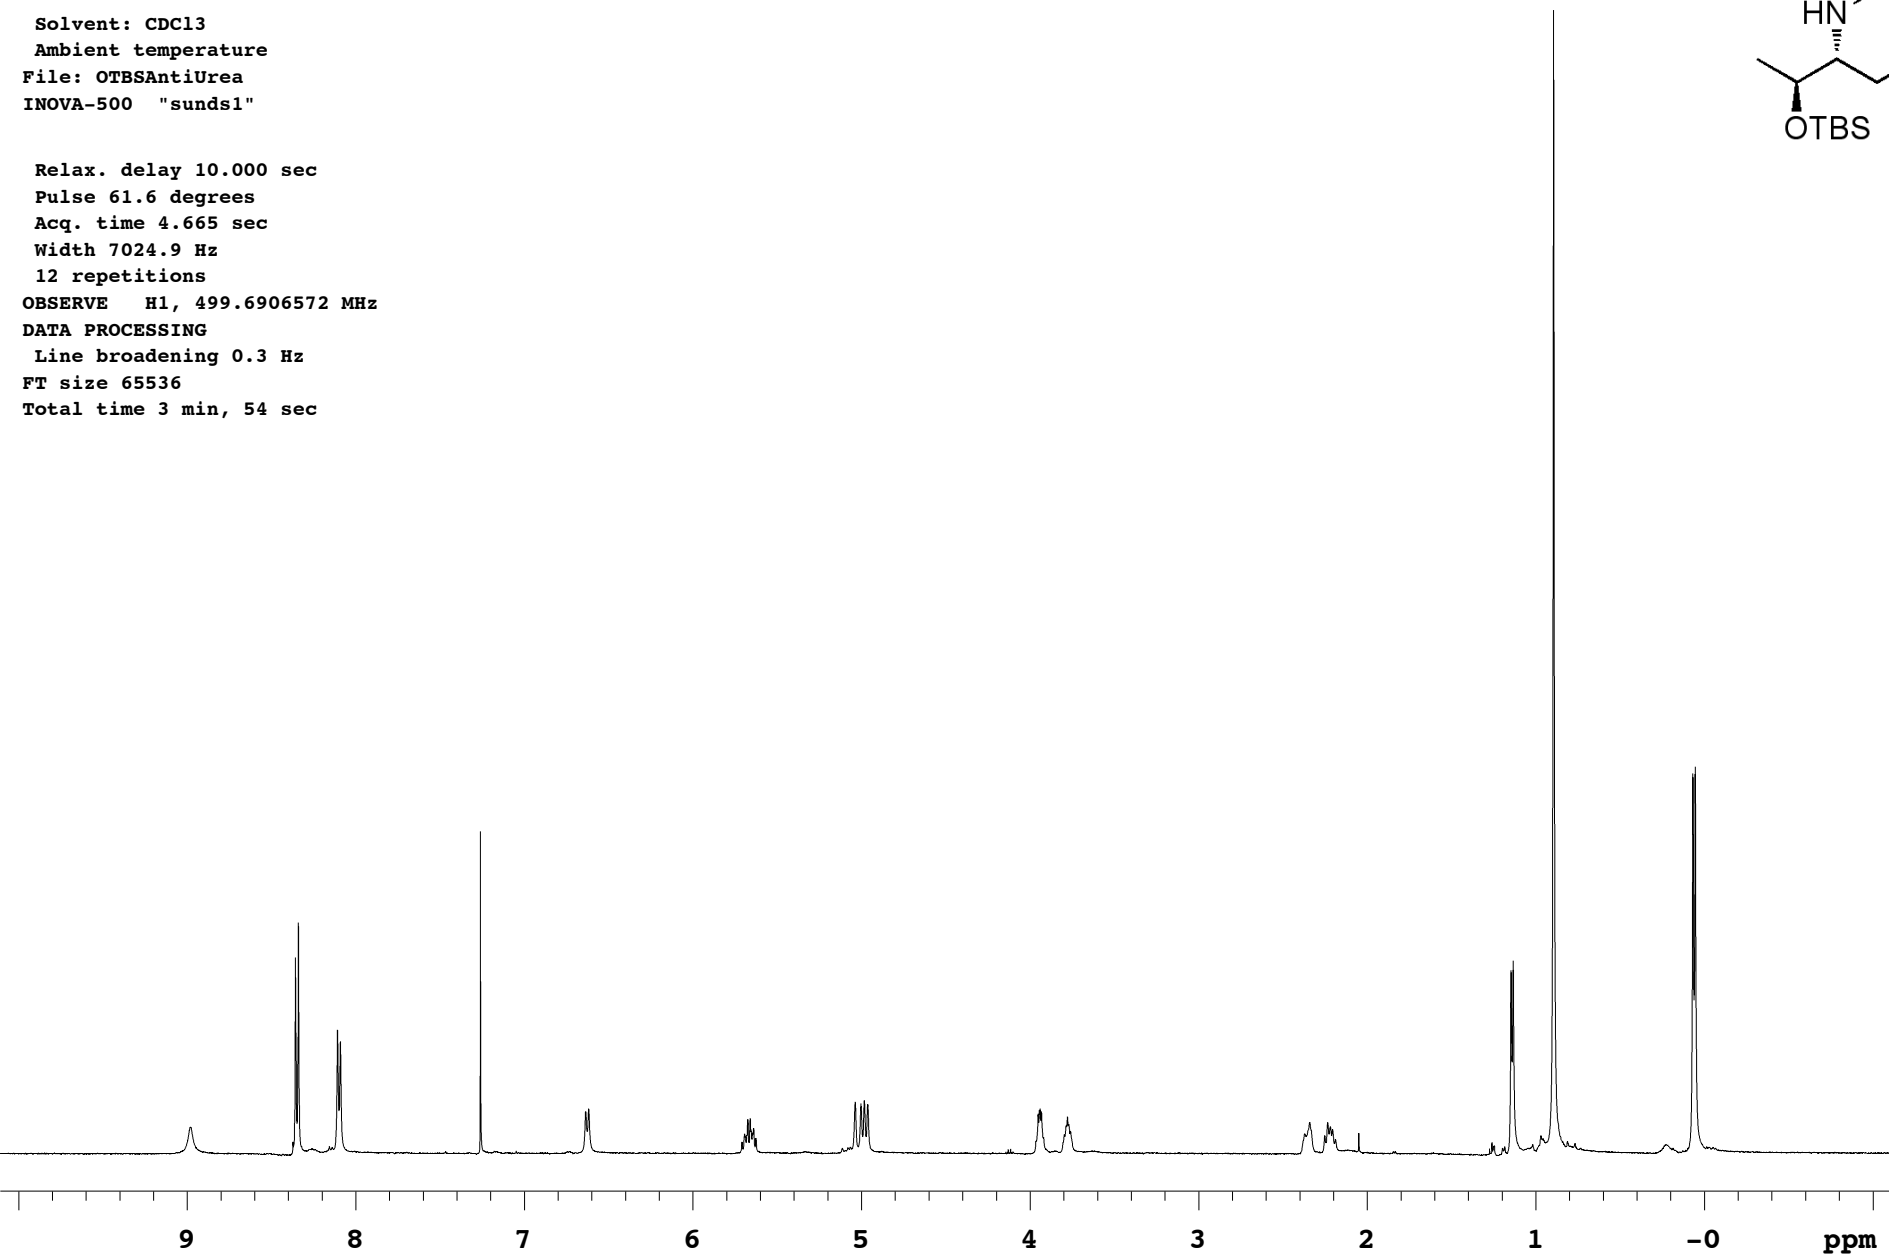

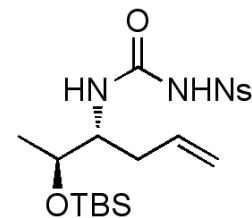

Pulse Sequence: s2pul

Solvent: CDCl<sub>3</sub>

Ambient temperature

User: 1-14-87

File: OTBSAntiUreaCarb

INOVA-500 "sunds1"

Relax. delay 1.000 sec

Pulse 65.9 degrees

Acq. time 1.086 sec

Width 30165.9 Hz

1504 repetitions

OBSERVE C13, 125.6472855 MHz

DECOUPLE H1, 499.6923275 MHz

Power 44 dB

continuously on

WALTZ-16 modulated

DATA PROCESSING

Line broadening 1.0 Hz

FT size 65536

Total time 58 hr, 11 min, 58 sec

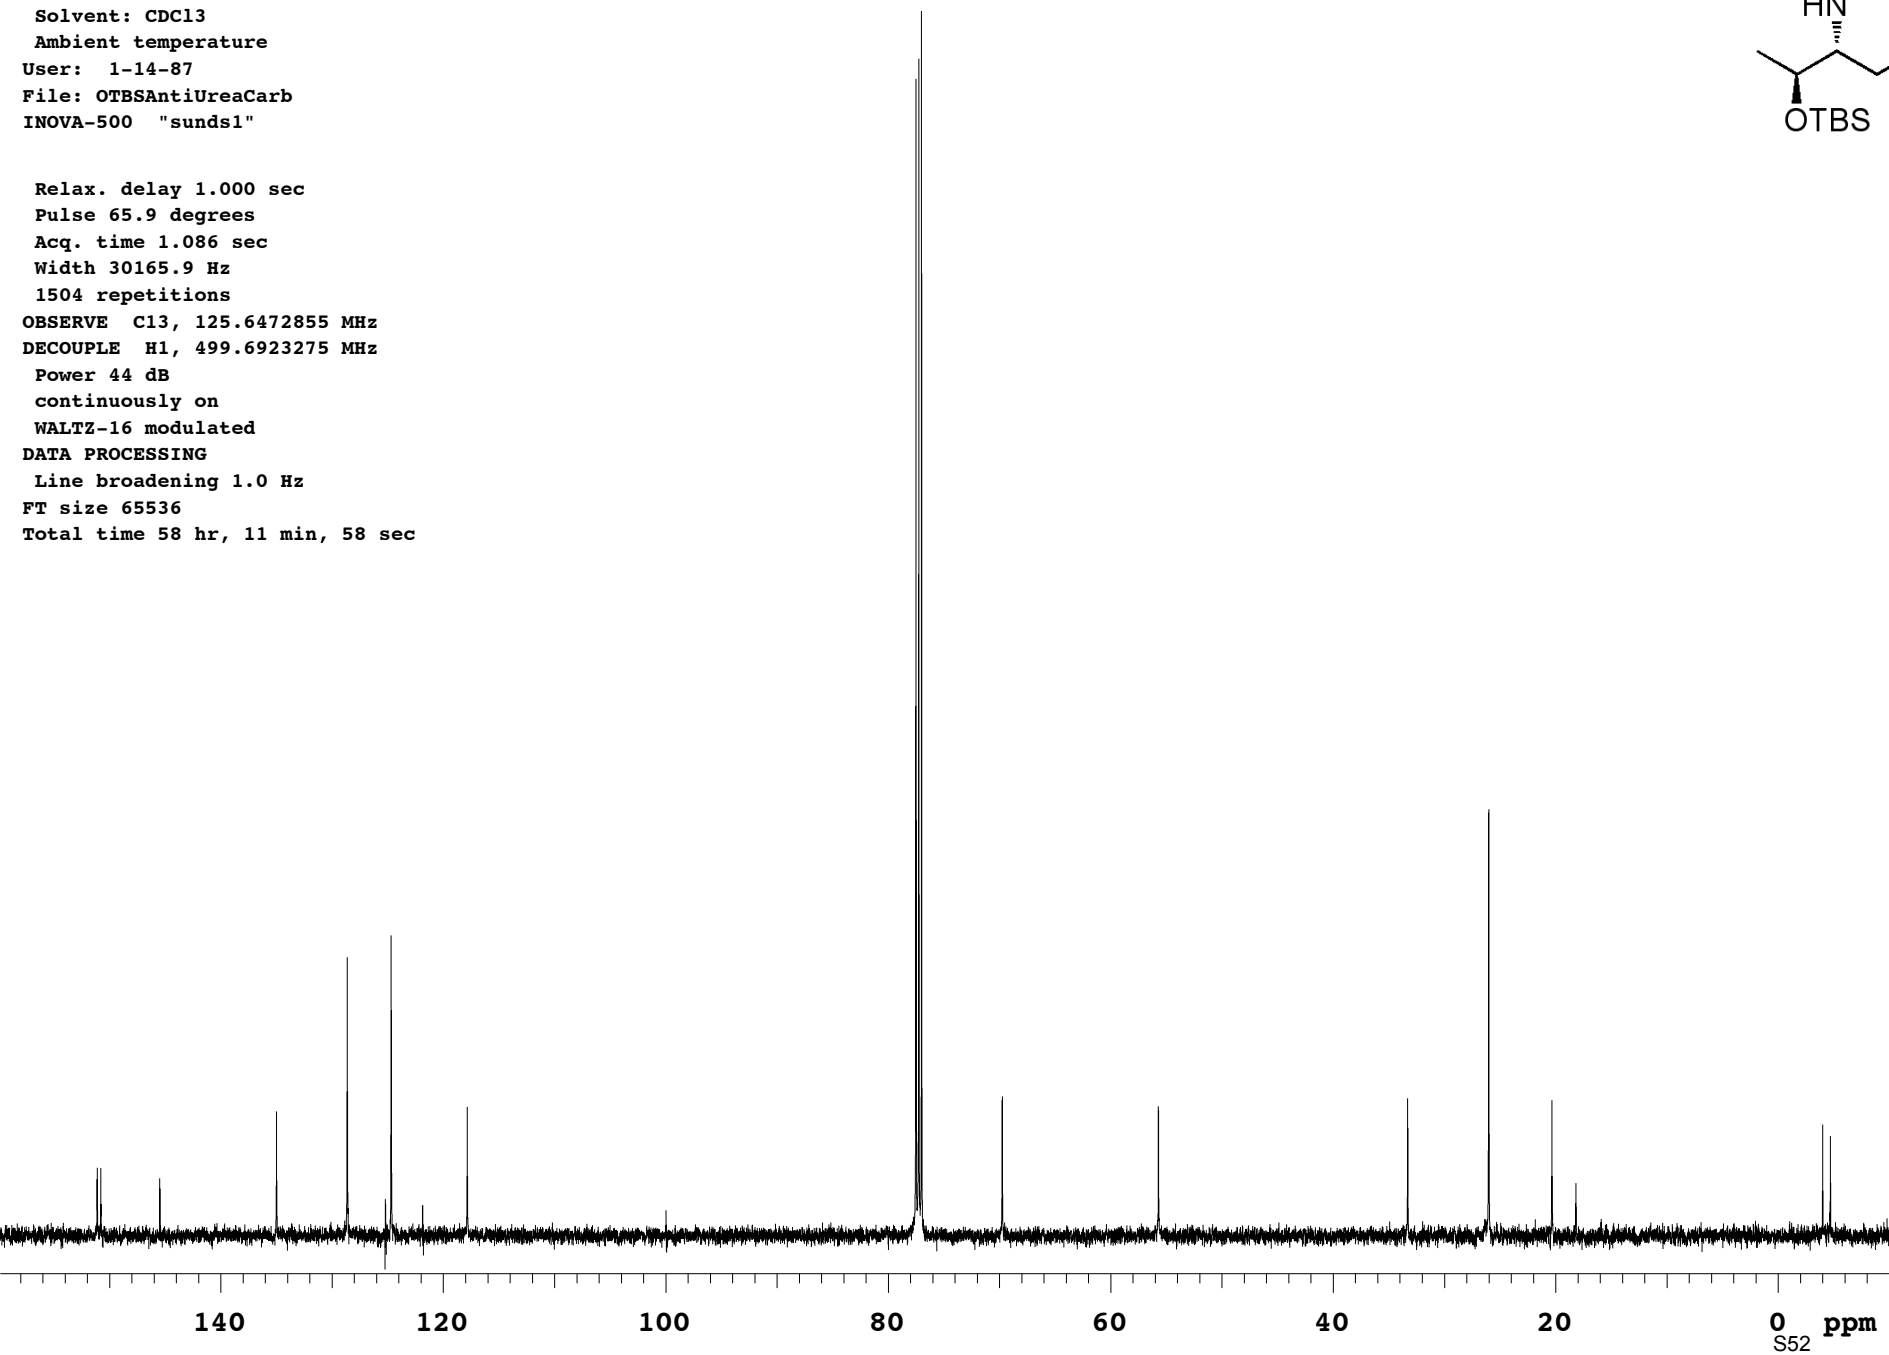

Pulse Sequence: s2pul

Solvent: CDCl<sub>3</sub>  
Ambient temperature  
File: GTR-7-135B  
INOVA-500 "sunds1"

Pulse 90.0 degrees  
Acq. time 4.096 sec  
Width 8000.0 Hz  
4 repetitions  
OBSERVE H1, 500.0677640 MHz  
DATA PROCESSING  
Line broadening 0.3 Hz  
FT size 65536  
Total time 1 min, 5 sec

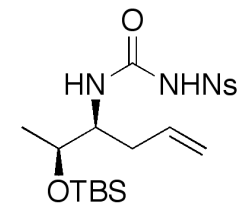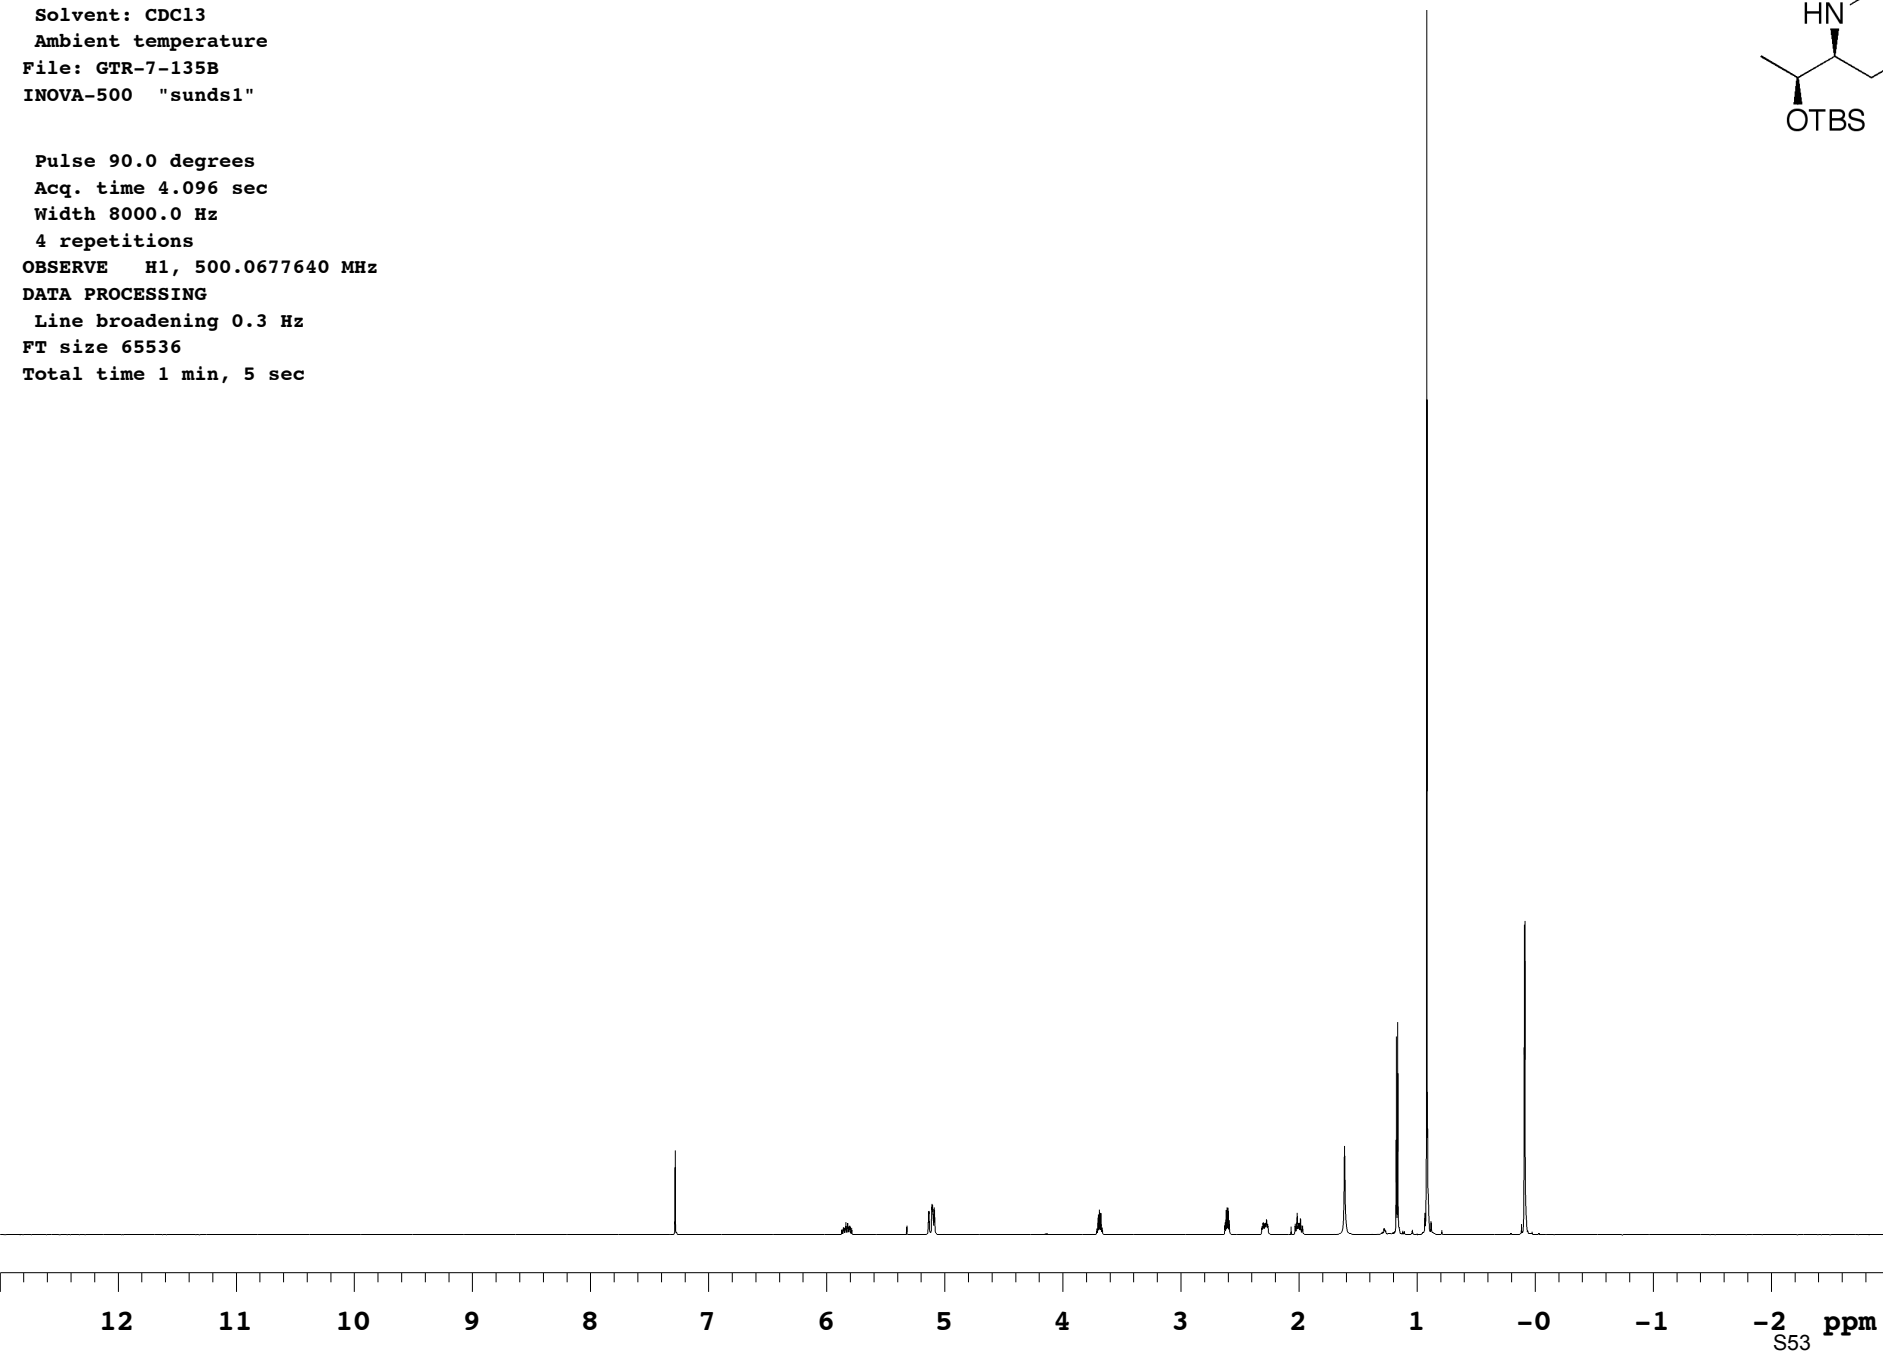

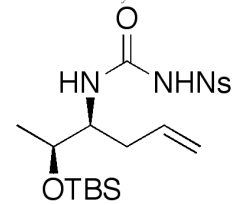

STANDARD CARBON PARAMETER

expl s2pul

|                     |                |              |
|---------------------|----------------|--------------|
| SAMPLE              |                | D            |
| date                | Jun 15 2012    | dfrq 499.432 |
| solvent             | CDC13          | dn H1        |
| file                | /export/home/~ | dpwr 47      |
| data/vxr500/White/~ | dof -827.0     |              |
| rice/OTBSAntiDASM-- | dm YYY         |              |
| Carb.fid            | dmm w          |              |
| ACQUISITION         |                | dmf 15873    |
| sfrq                | 125.596        | dseq         |
| tn                  | C13            | dres 1.0     |
| at                  | 1.024          | homo n       |
| np                  | 65536          | PROCESSING   |
| sw                  | 32000.0        | lb 1.00      |
| fb                  | 18000          | wtfile       |
| bs                  | 4              | proc ft      |
| ss                  | 1              | fn not used  |
| tpwr                | 63             | math f       |
| pw                  | 4.5            |              |
| d1                  | 1.000          | werr         |
| tof                 | 1880.0         | wexp         |
| nt                  | 10000          | wbs          |
| ct                  | 108            | wnt          |
| alock               | n              |              |
| gain                | not used       |              |
| FLAGS               |                |              |
| il                  | n              |              |
| in                  | n              |              |
| dp                  | y              |              |
| hs                  | nn             |              |
| DISPLAY             |                |              |
| sp                  | -2058.2        |              |
| wp                  | 27541.0        |              |
| vs                  | 162            |              |
| sc                  | 0              |              |
| wc                  | 250            |              |
| hzmm                | 110.16         |              |
| is                  | 500.00         |              |
| rfl                 | 11889.6        |              |
| rfp                 | 9689.9         |              |
| th                  | 9              |              |
| ins                 | 100.000        |              |
| nm                  | ph             |              |

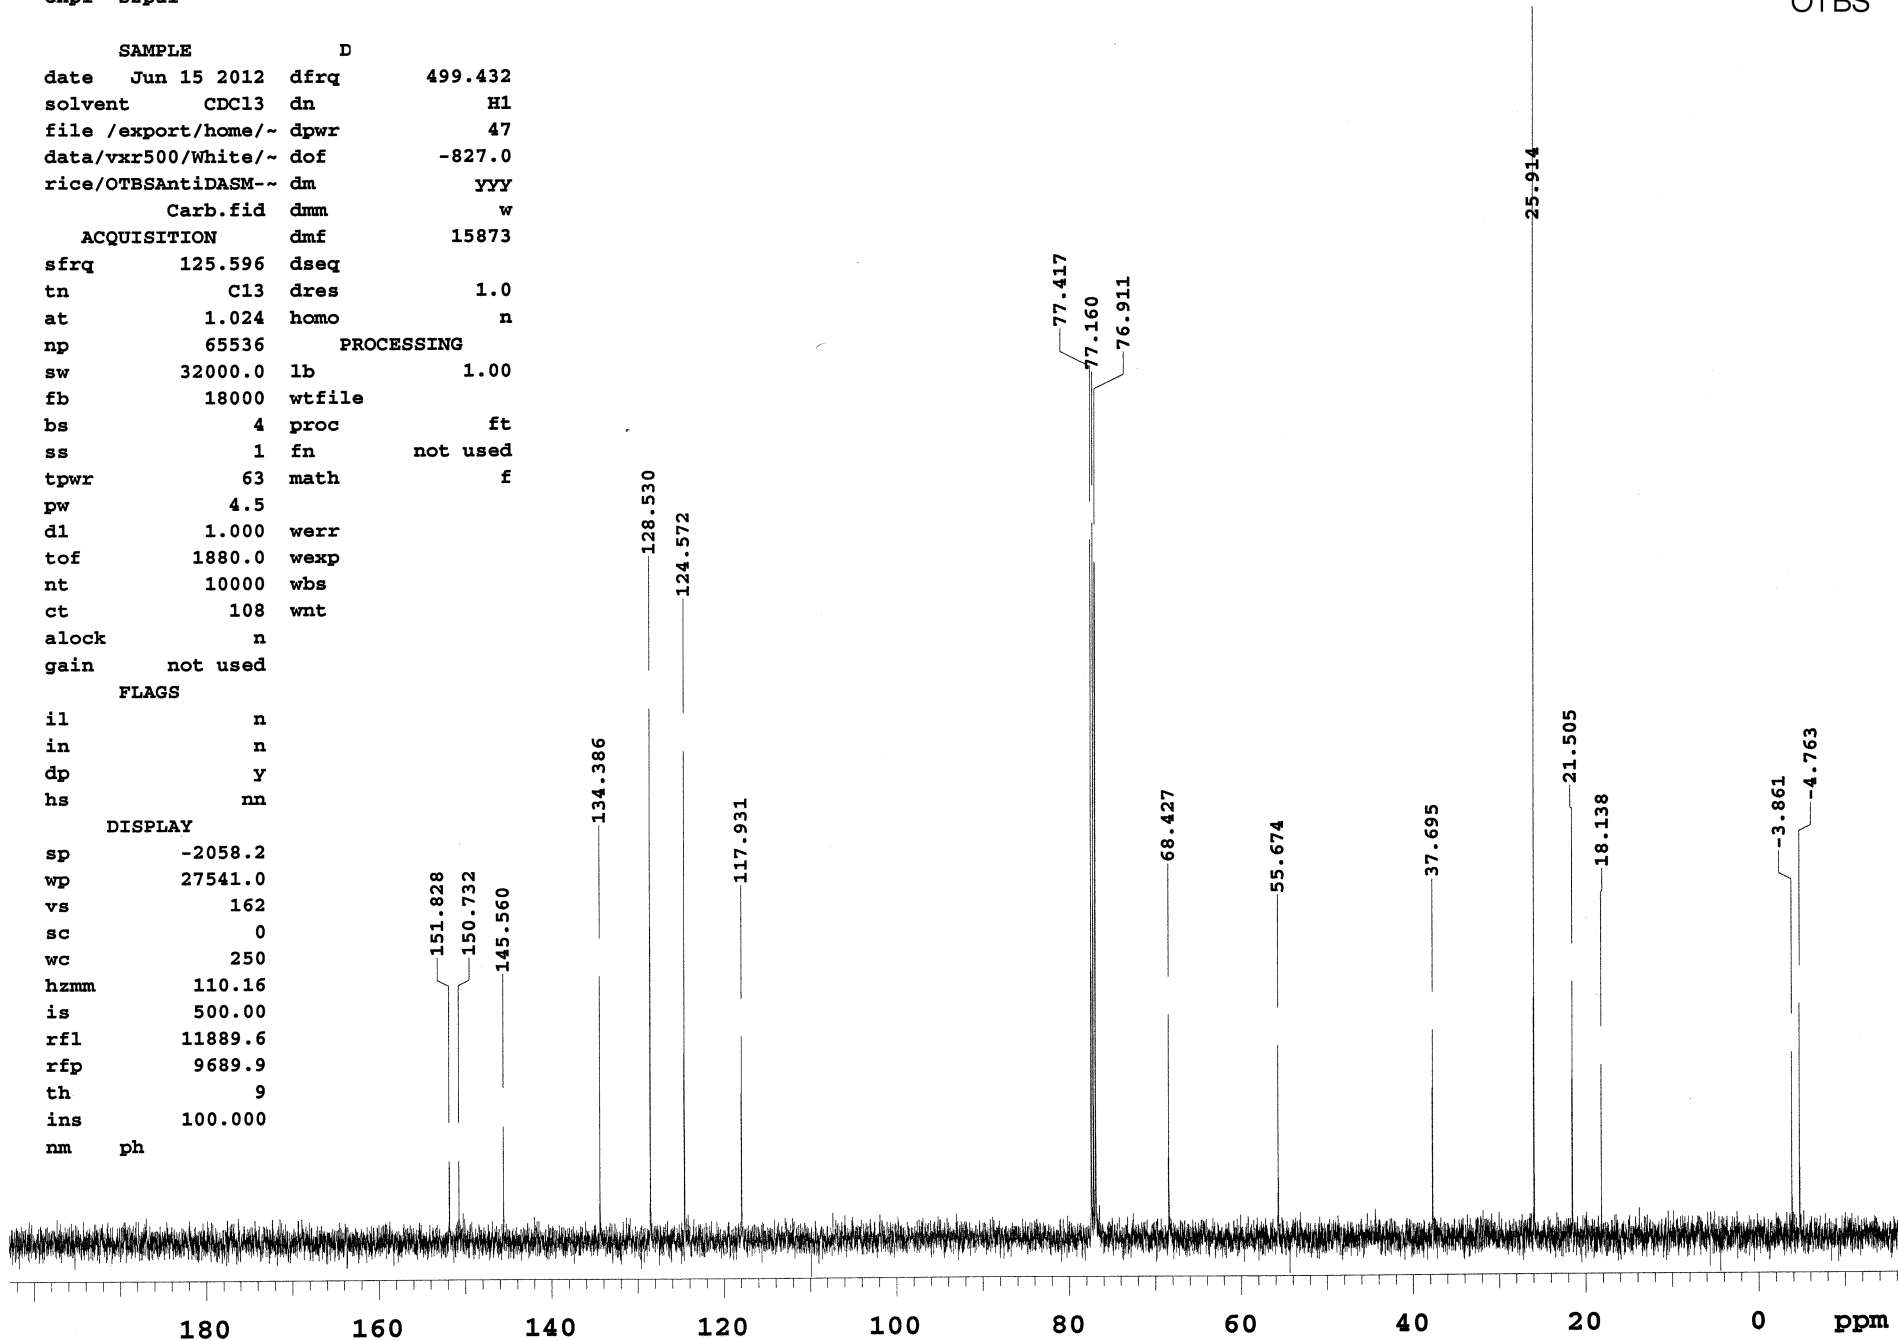

Pulse Sequence: s2pul

Solvent: CDCl<sub>3</sub>

Ambient temperature

File: FPhdiamineSM

INNOVA-500 "sunds1"

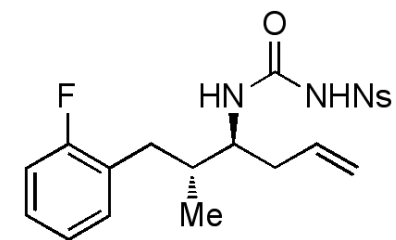

Relax. delay 5.000 sec

Pulse 90.0 degrees

Acq. time 4.096 sec

Width 8000.0 Hz

16 repetitions

OBSERVE H1, 500.0677745 MHz

DATA PROCESSING

Line broadening 0.3 Hz

FT size 65536

Total time 2 min, 25 sec

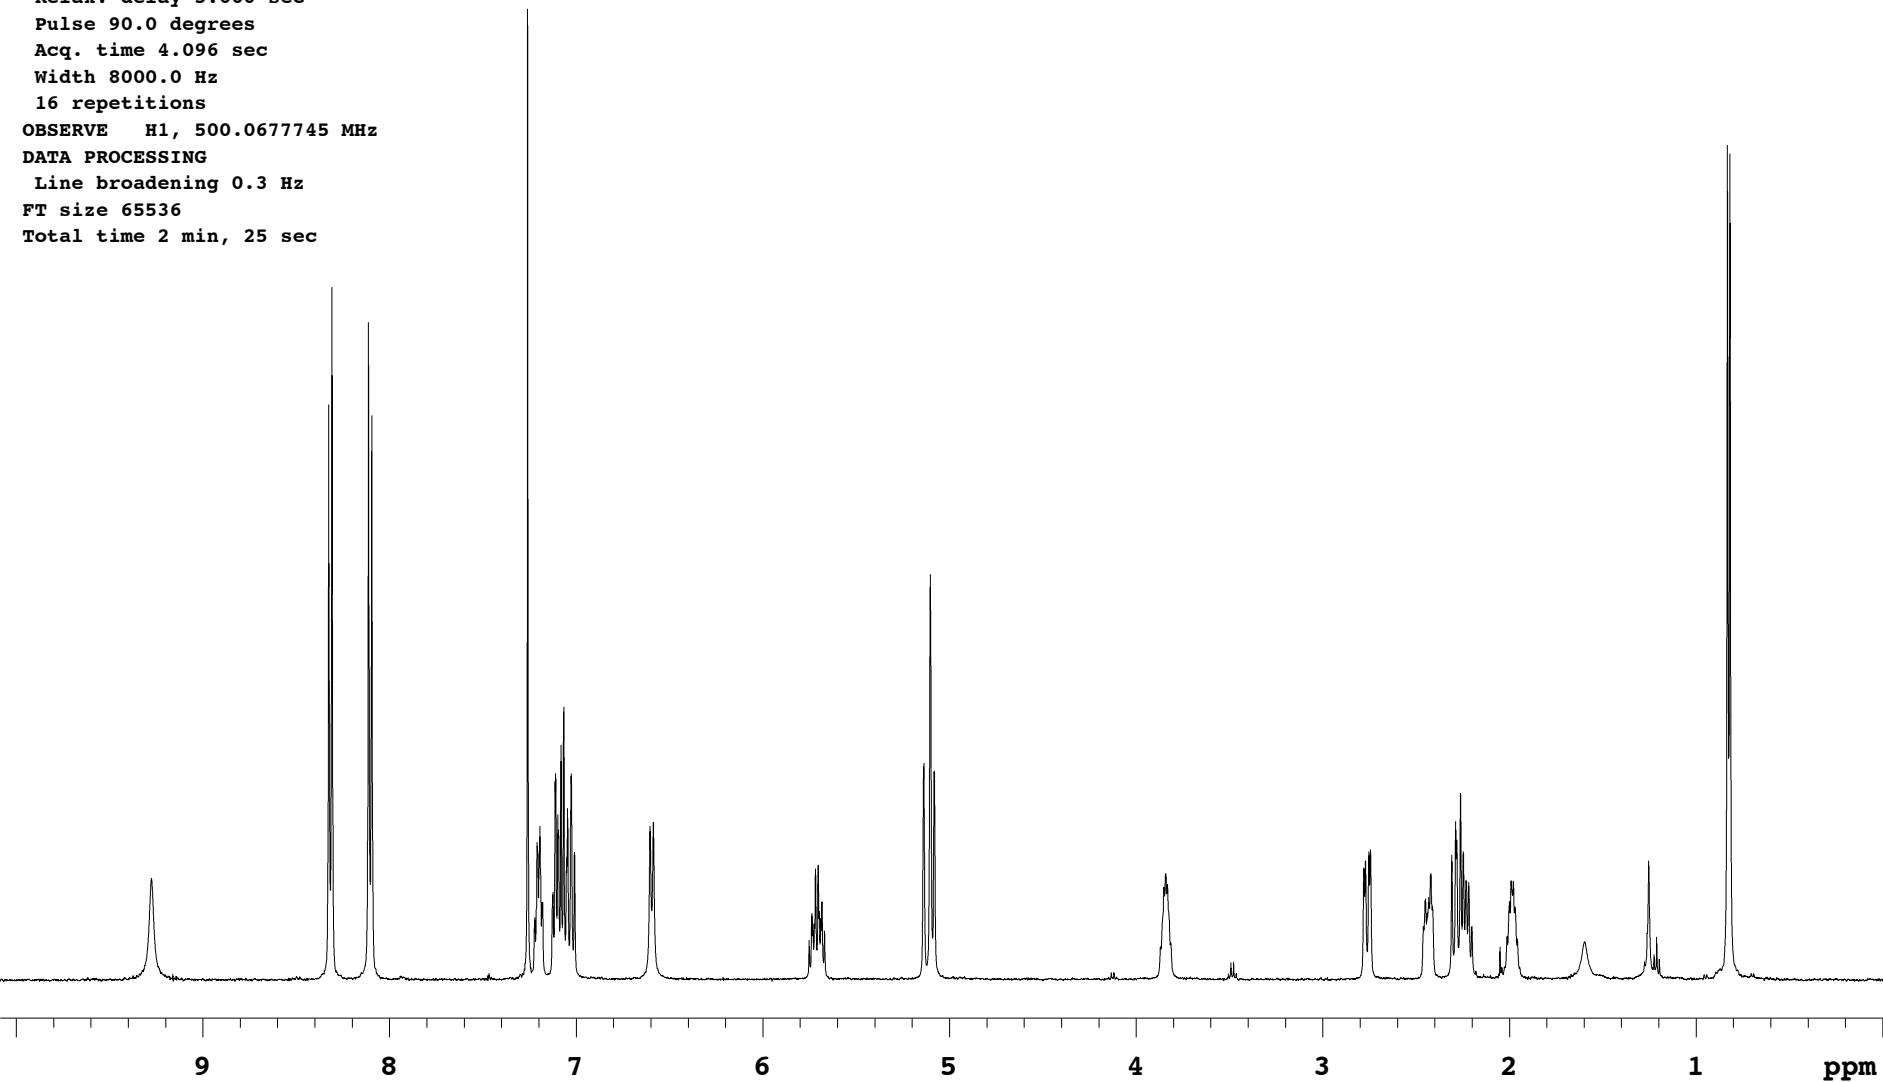

Pulse Sequence: s2pul

Solvent: CDCl<sub>3</sub>

Ambient temperature

User: 1-14-87

File: FPhSynDiamSMBest

INOVA-500 "sunds1"

Relax. delay 1.000 sec

Pulse 36.5 degrees

Acq. time 1.086 sec

Width 30165.9 Hz

488 repetitions

OBSERVE C13, 125.6472956 MHz

DECOUPLE H1, 499.6923275 MHz

Power 44 dB

continuously on

WALTZ-16 modulated

DATA PROCESSING

Line broadening 2.0 Hz

FT size 65536

Total time 58 hr, 11 min, 58 sec

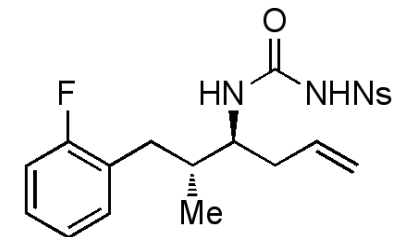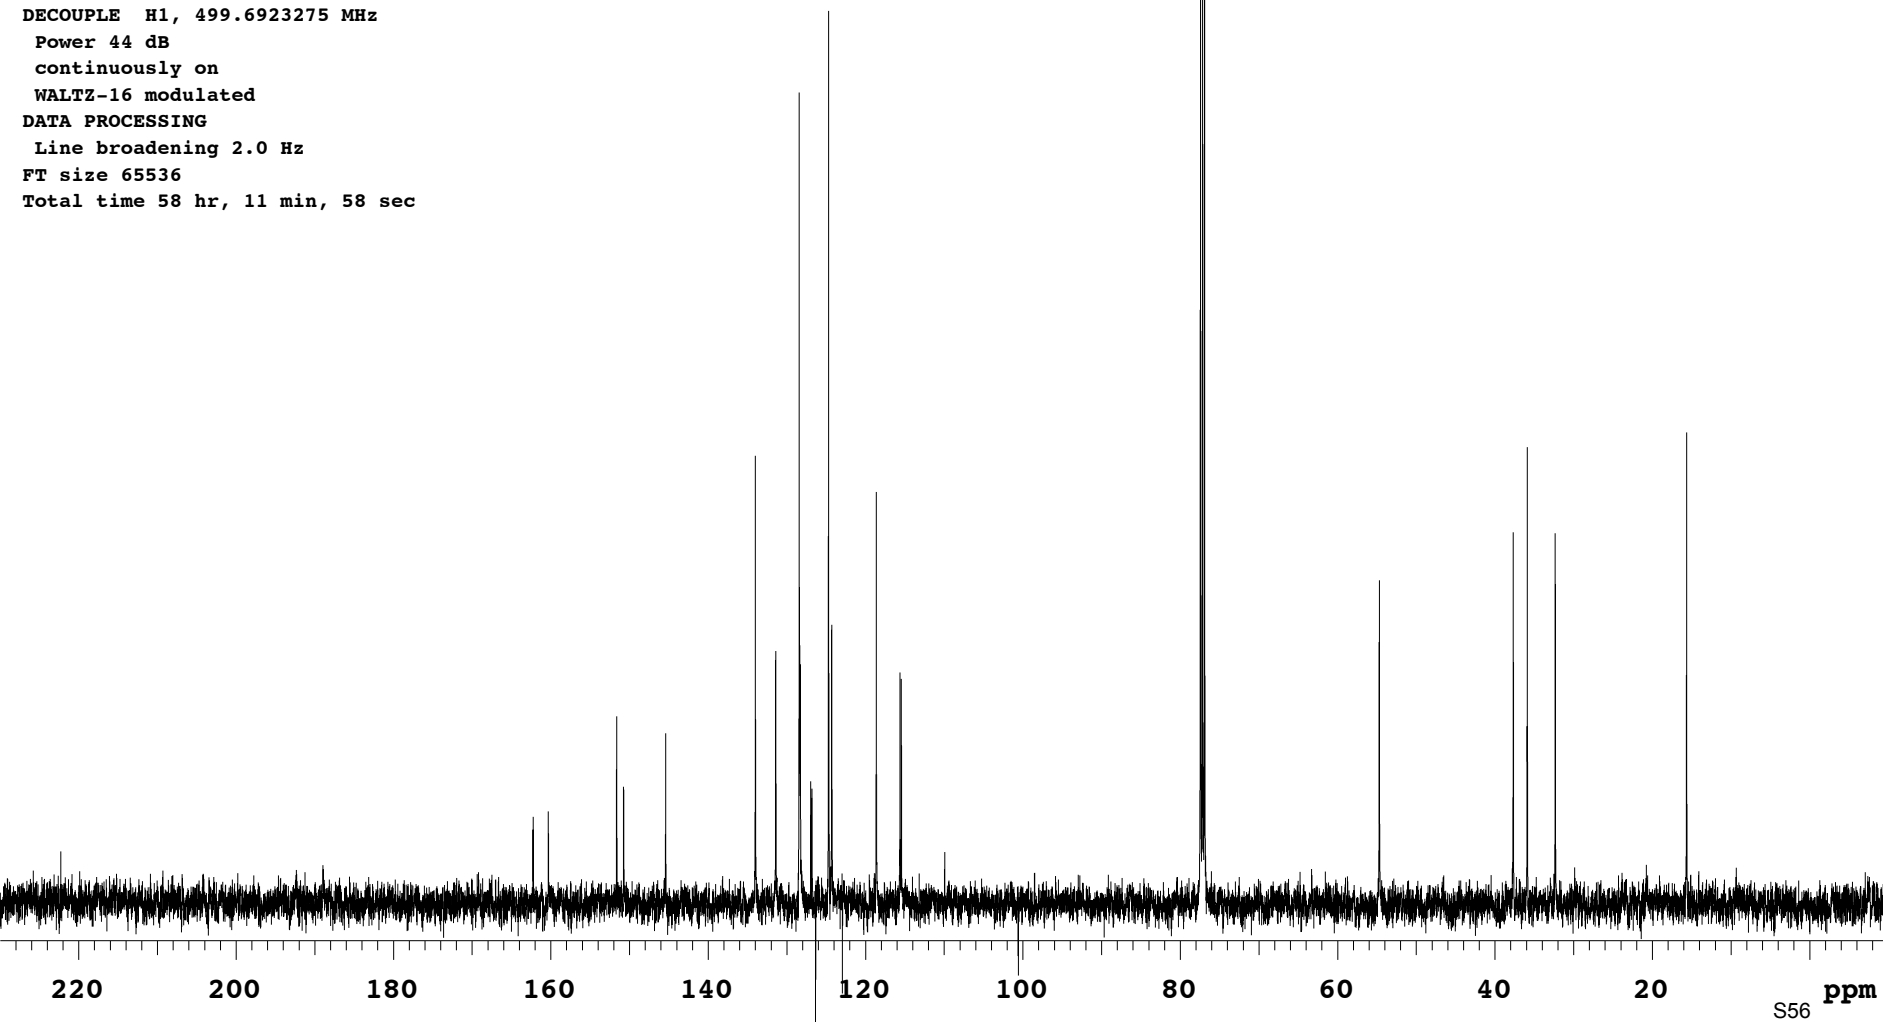

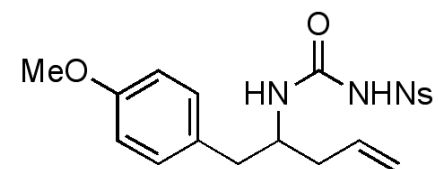

Pulse Sequence: s2pul

Solvent: CDCl<sub>3</sub>

Ambient temperature

File: OMe\_SM

INOVA-500 "sunds1"

Relax. delay 5.000 sec

Pulse 90.0 degrees

Acq. time 4.096 sec

Width 8000.0 Hz

10 repetitions

OBSERVE H1, 500.0677755 MHz

DATA PROCESSING

Line broadening 0.3 Hz

FT size 65536

Total time 2 min, 25 sec

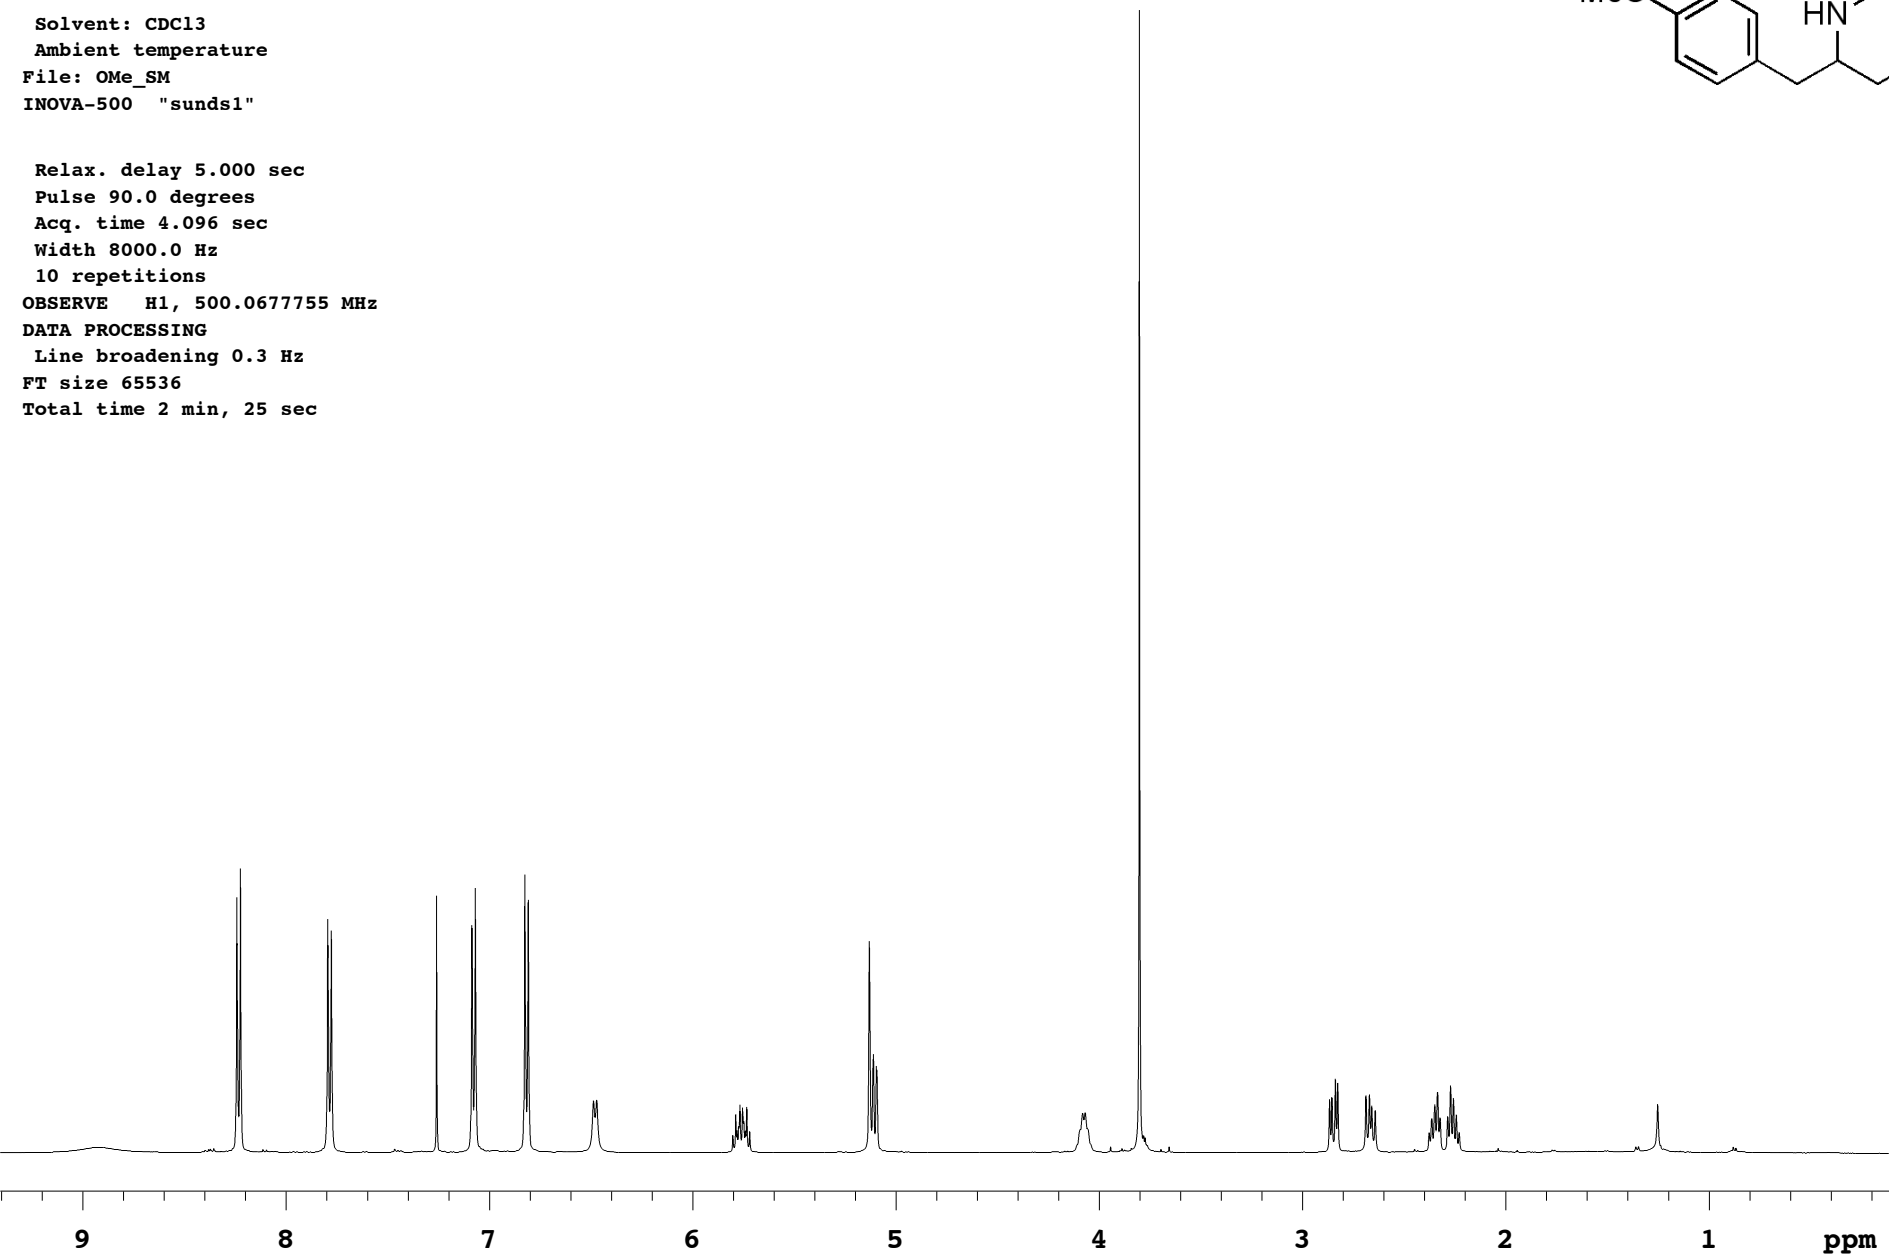



Pulse Sequence: s2pul

Solvent: CDCl<sub>3</sub>

Ambient temperature

User: 1-14-87

File: OMe\_SM\_C

INOVA-500 "sunds1"

Relax. delay 5.000 sec

Pulse 45.0 degrees

Acq. time 1.024 sec

Width 32000.0 Hz

906 repetitions

OBSERVE C13, 125.5817166 MHz

DECOUPLE H1, 499.4315638 MHz

Power 48 dB

continuously on

WALTZ-16 modulated

DATA PROCESSING

Line broadening 1.0 Hz

FT size 65536

Total time 2 hr, 30 min, 55 sec

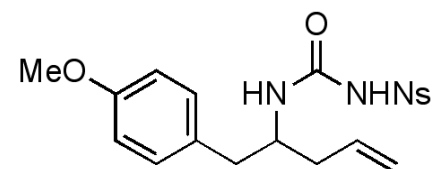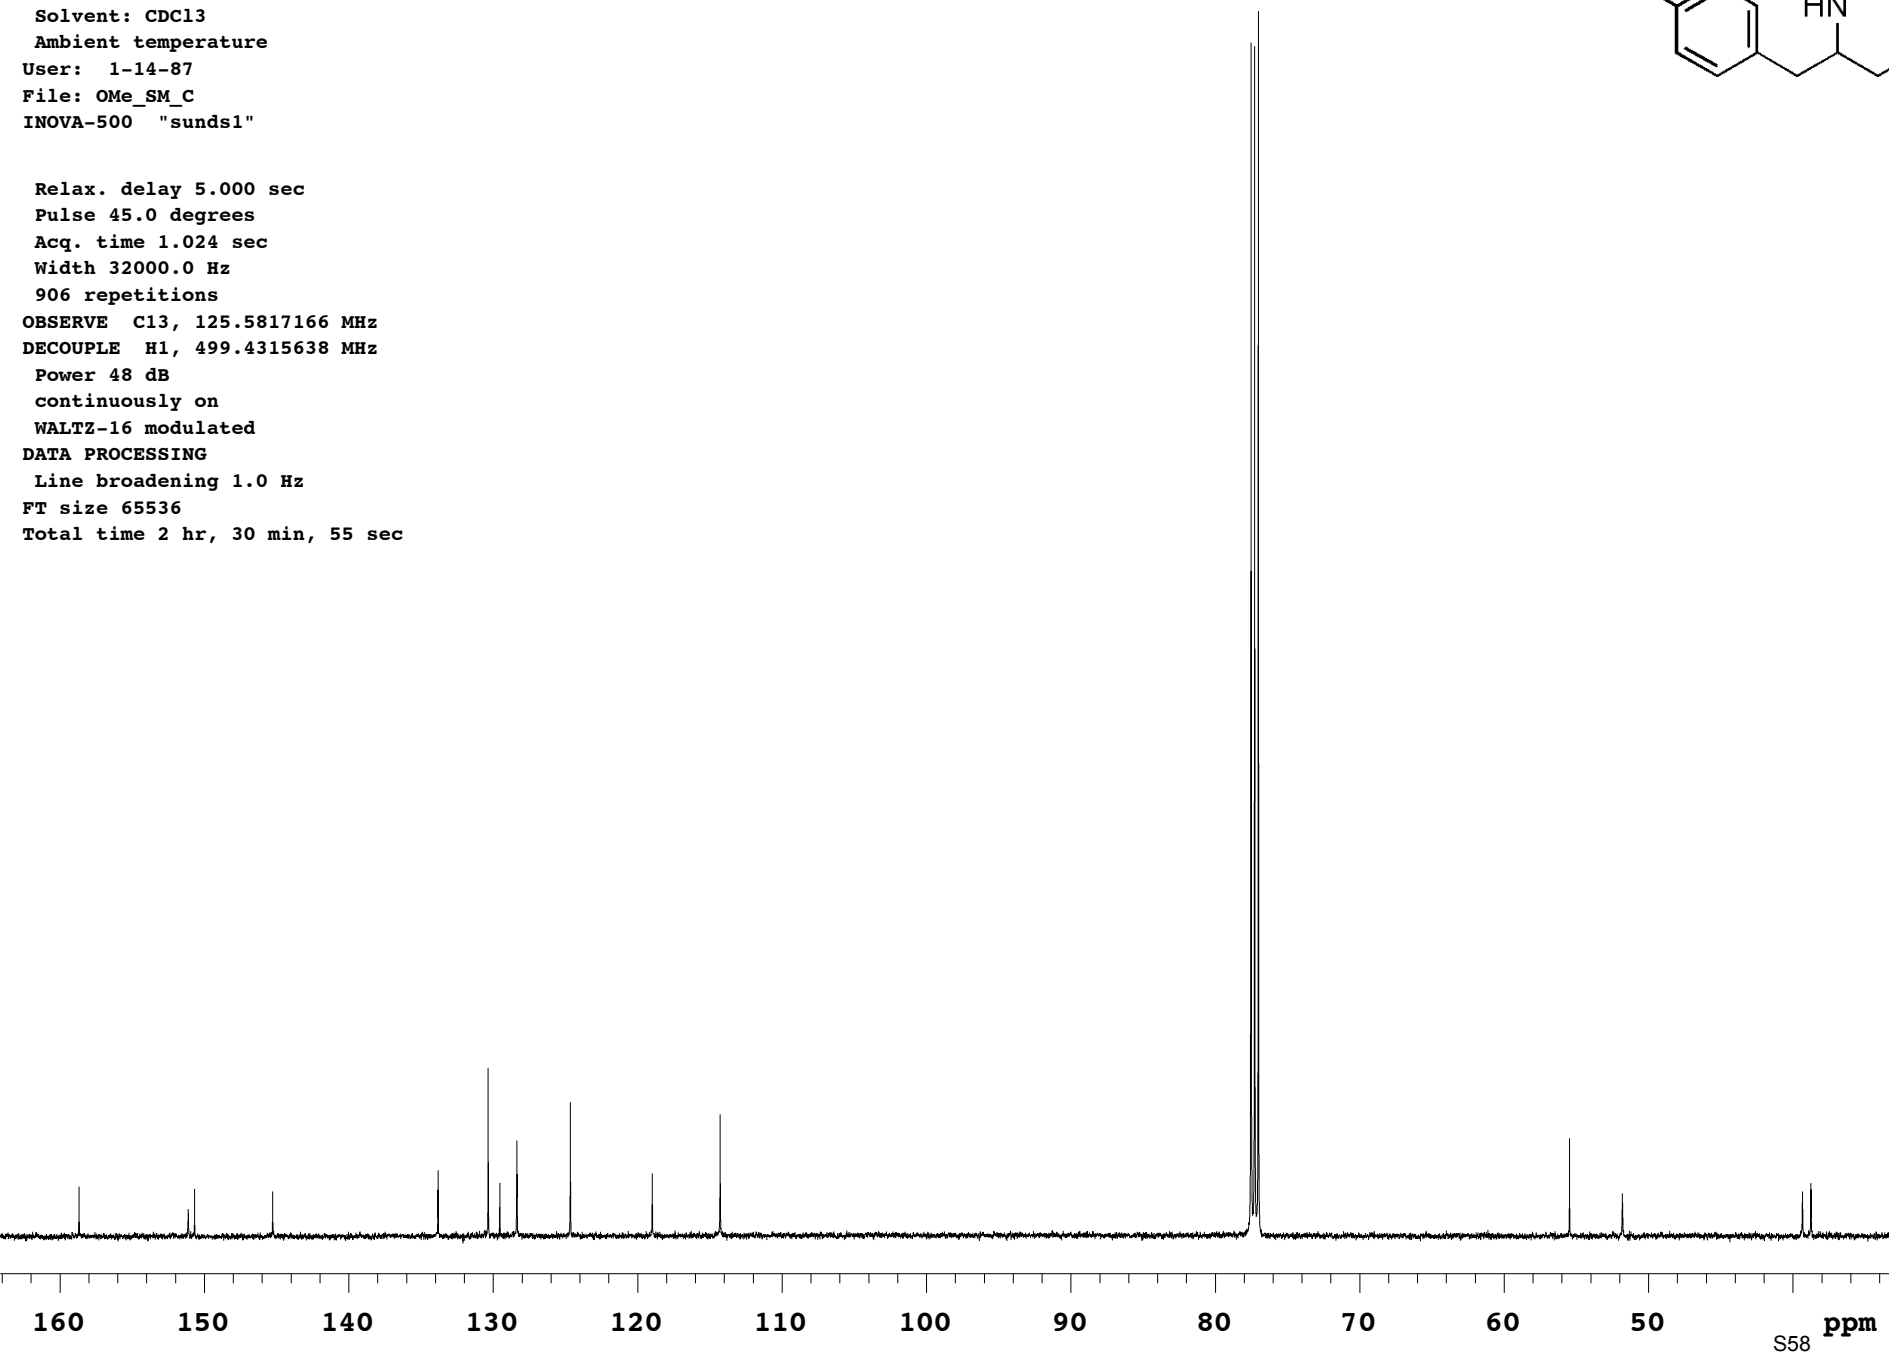

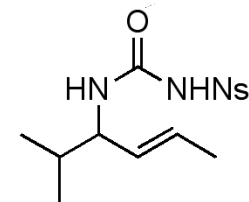

## STANDARD PROTON PARAMETERS

exp1 s2pu1

| SAMPLE      |            | DEC. & VT  |          |
|-------------|------------|------------|----------|
| date        | Mar 9 2010 | dfrq       | 500.070  |
| solvent     | CDC13      | dn         | H1       |
| file        | exp        | dpwr       | 18       |
| ACQUISITION |            | dof        |          |
| sfrq        | 500.070    | dm         | nnn      |
| tn          | H1         | dmm        | c        |
| at          | 4.096      | dmf        | 200      |
| np          | 65536      | dseq       |          |
| sw          | 8000.0     | dres       | 1.0      |
| fb          | 4000       | homo       | n        |
| bs          | 2          | DEC2       |          |
| tpwr        | 55         | dfrq2      | 0        |
| pw          | 9.0        | dn2        |          |
| d1          | 5.000      | dpwr2      | 1        |
| tof         | 0          | dof2       | 0        |
| nt          | 12         | dm2        | n        |
| ct          | 12         | dmm2       | c        |
| alock       | n          | dmf2       | 200      |
| gain        | not used   | dseq2      |          |
| FLAGS       |            | dres2      |          |
| il          | n          | homo2      | n        |
| in          | n          | PROCESSING |          |
| dp          | y          | lb         | 0.30     |
| hs          | nn         | wtfile     |          |
| DISPLAY     |            | proc       |          |
| sp          | -104.9     | fn         | not used |
| wp          | 4919.2     | math       | f        |
| vs          | 37         |            |          |
| sc          | 0          | werr       |          |
| wc          | 250        | wexp       |          |
| hzmm        | 19.68      | wbs        |          |
| is          | 33.57      | wnt        |          |
| rfl         | 5141.1     |            |          |
| rfp         | 3630.5     |            |          |
| th          | 7          |            |          |
| ins         | 100.000    |            |          |
| ai          | ph         |            |          |

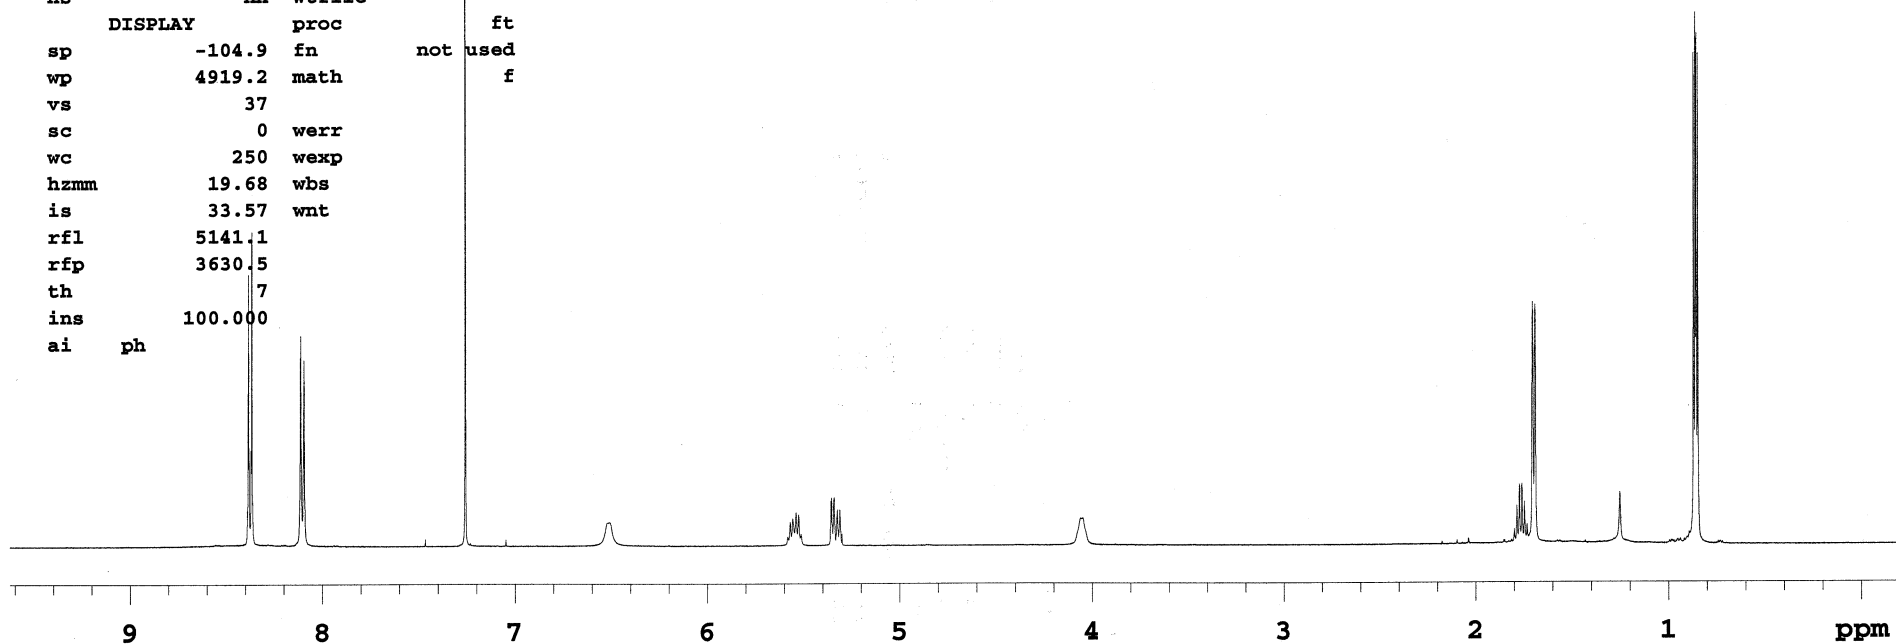

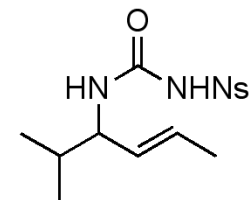

Pulse Sequence: s2pul

Solvent: CDCl3

Ambient temperature

User: 1-14-87

File: Int\_Olefin

INOVA-500 "sunds1"

Relax. delay 5.000 sec

Pulse 65.9 degrees

Acq. time 1.086 sec

Width 30165.9 Hz

400 repetitions

OBSERVE C13, 125.6472855 MHz

DECOUPLE H1, 499.6923275 MHz

Power 44 dB

continuously on

WALTZ-16 modulated

DATA PROCESSING

Line broadening 1.0 Hz

FT size 65536

Total time 40 min, 44 sec

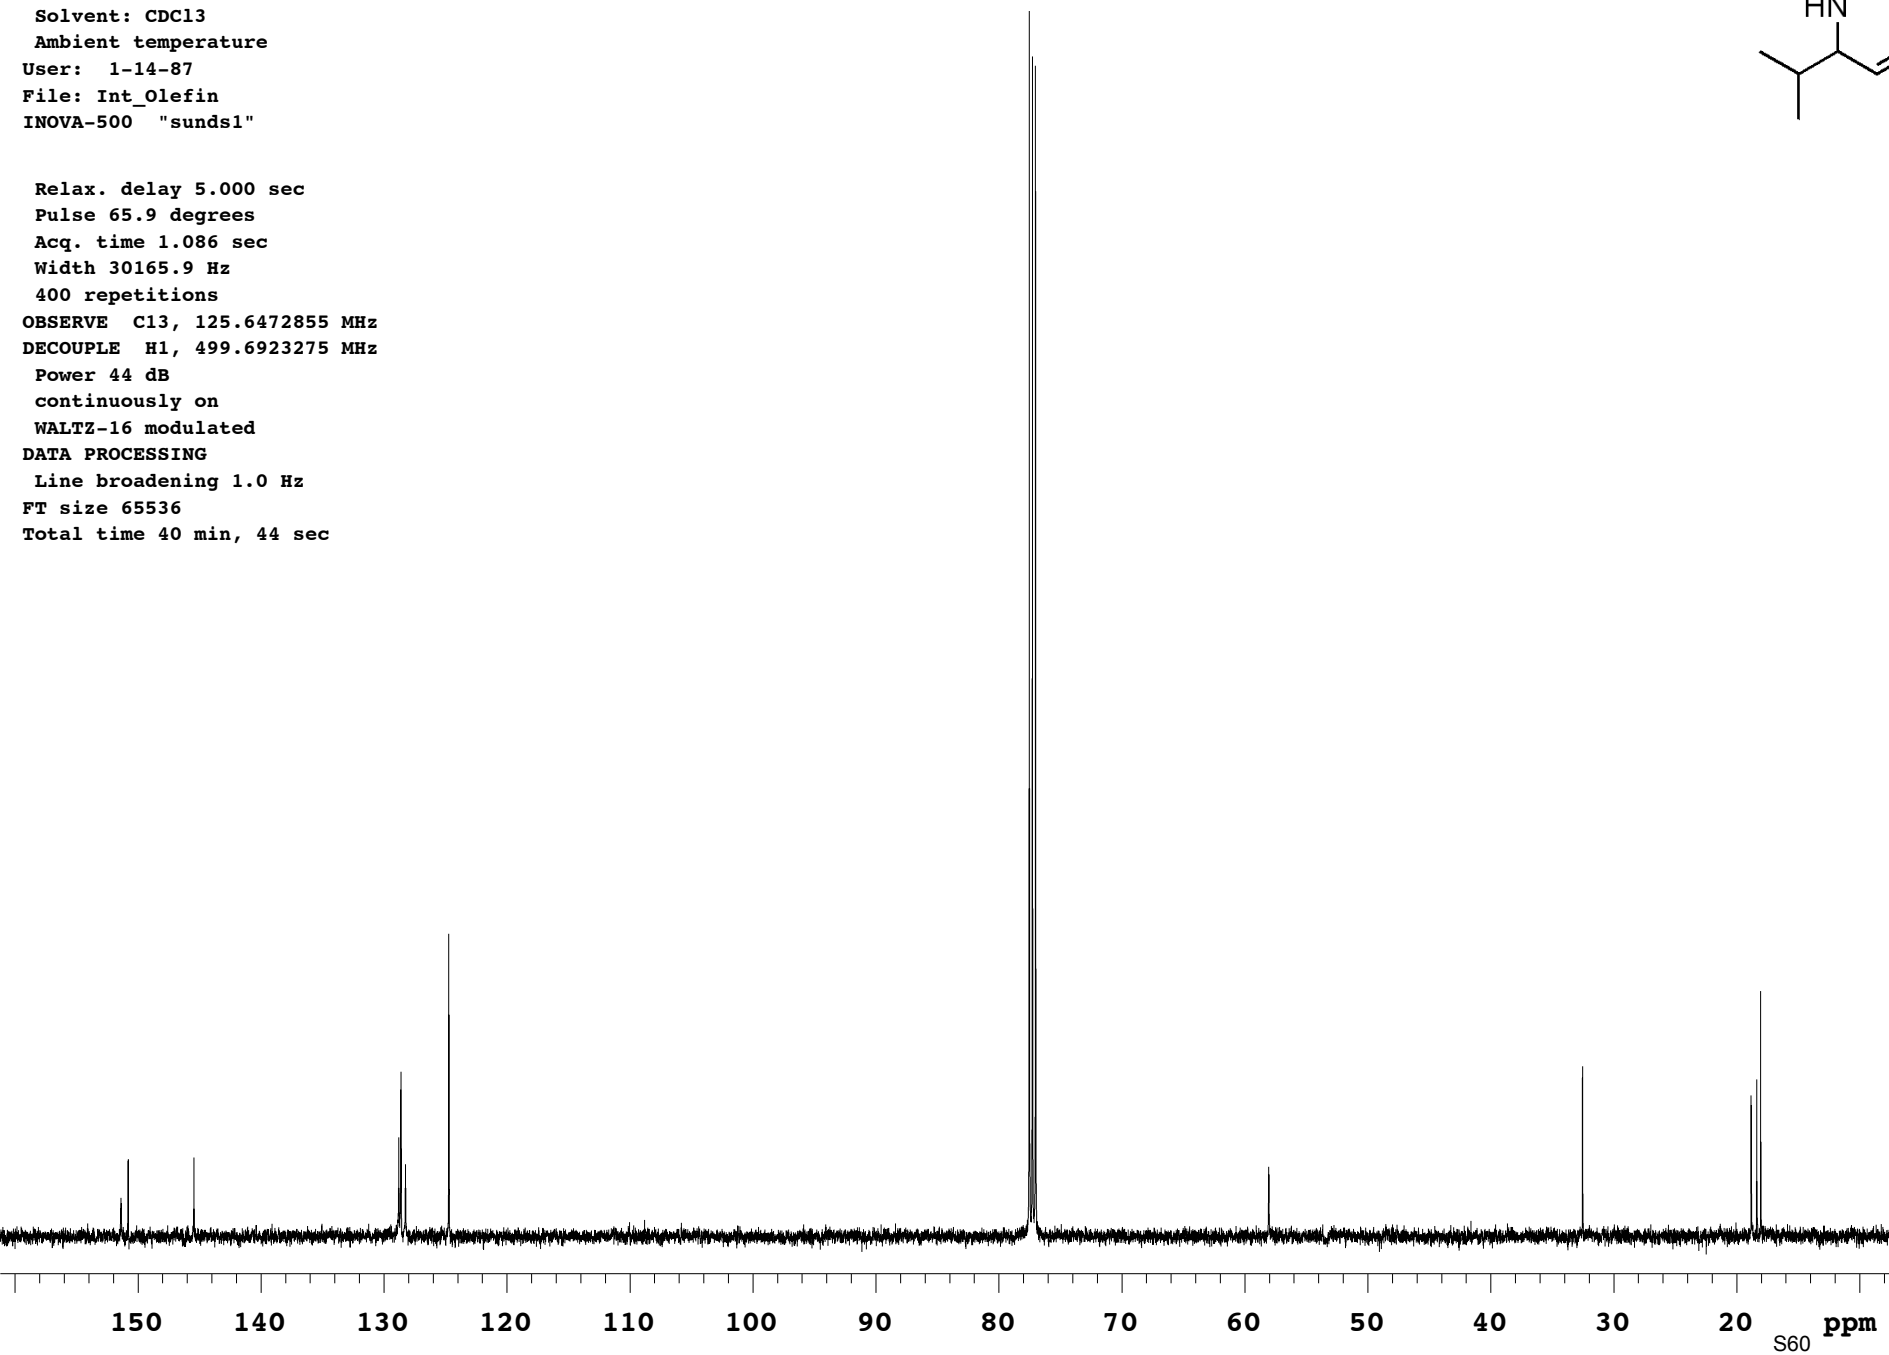

Pulse Sequence: s2pul

Solvent: CDCl3

Ambient temperature

File: allylicOAc\_SM

INOVA-500 "sunds1"

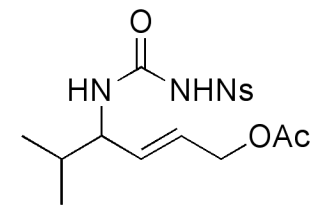

Relax. delay 5.000 sec

Pulse 90.0 degrees

Acq. time 4.096 sec

Width 8000.0 Hz

6 repetitions

OBSERVE H1, 500.0677753 MHz

DATA PROCESSING

Line broadening 0.3 Hz

FT size 65536

Total time 1 min, 12 sec

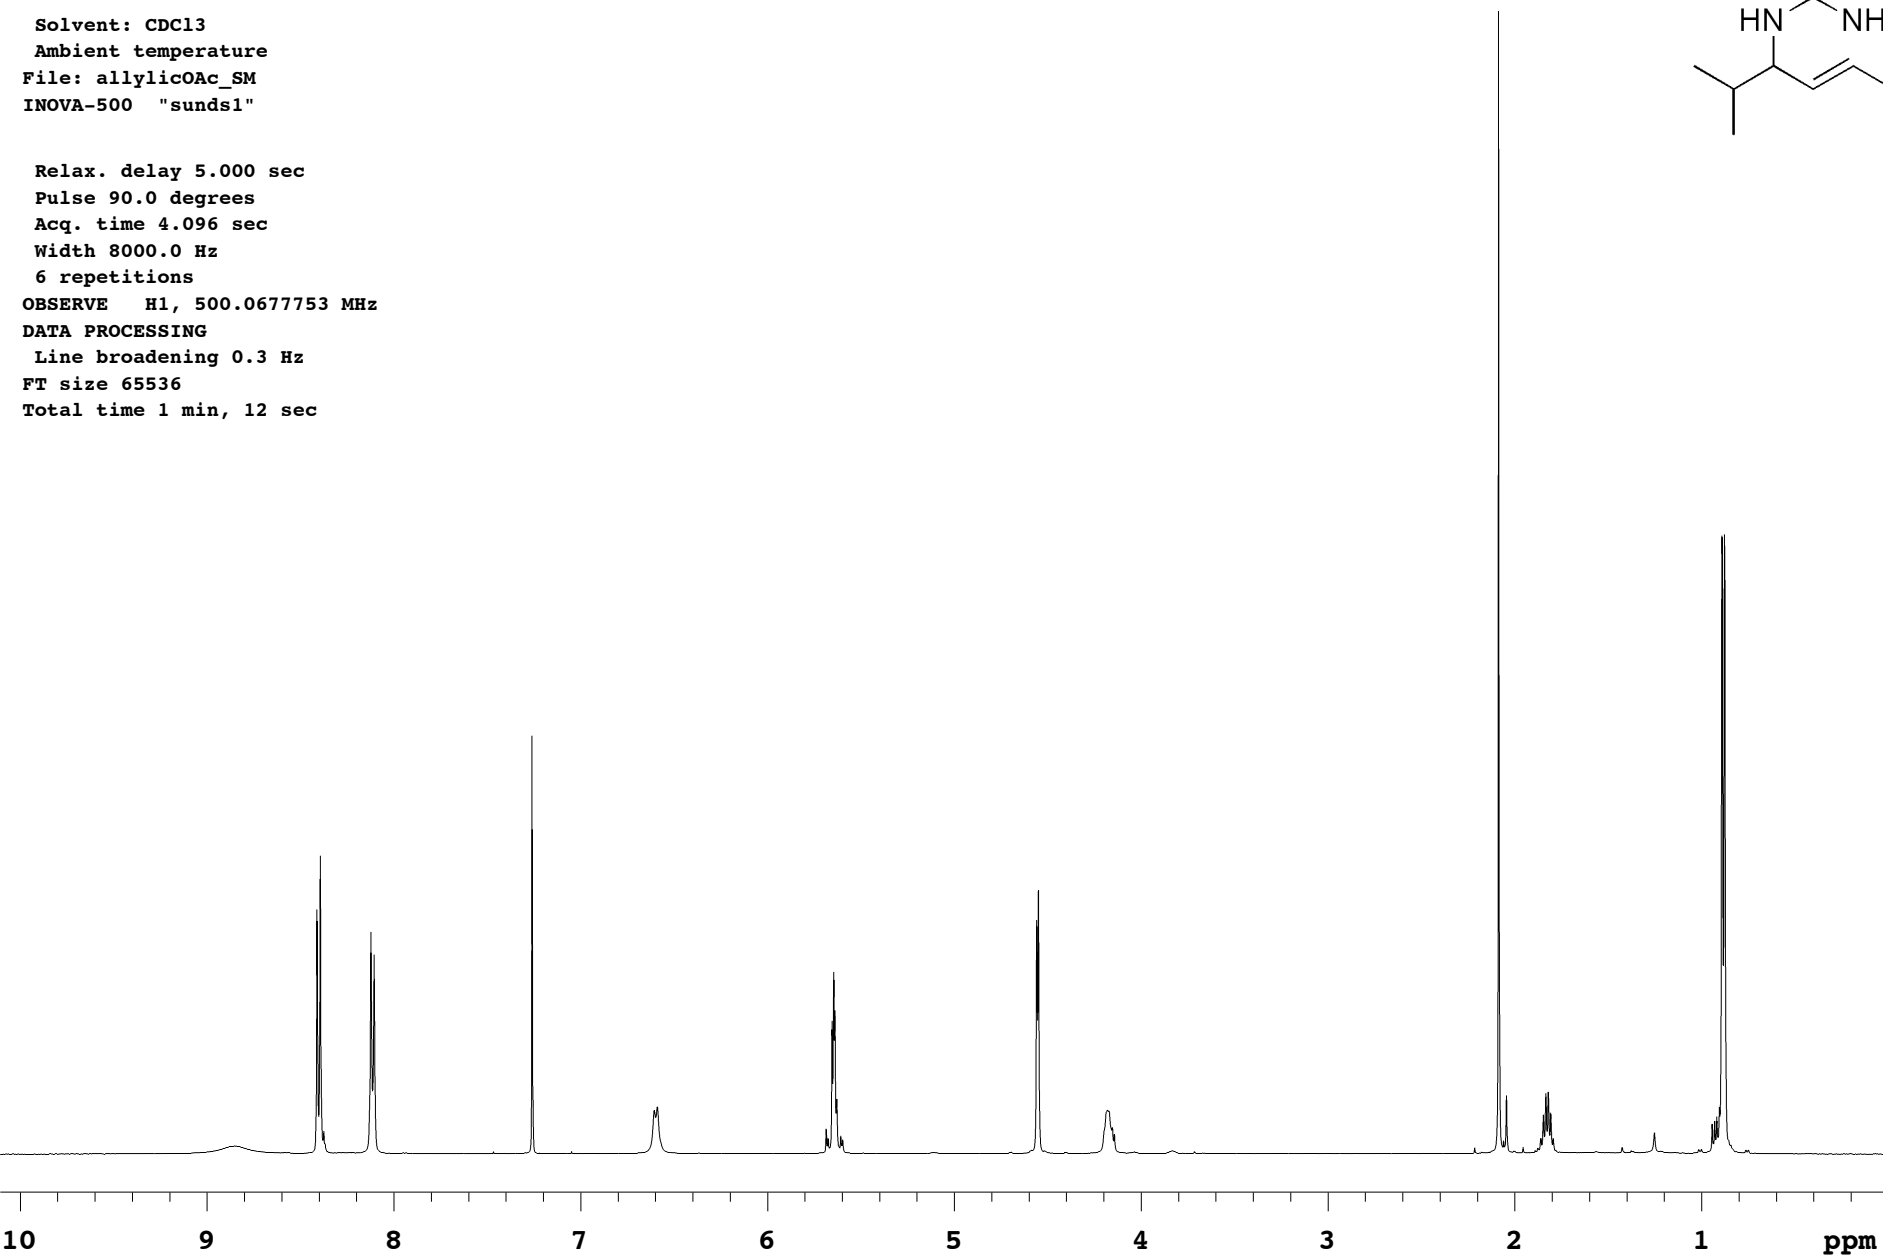

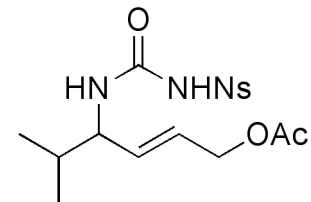

Pulse Sequence: s2pul

Solvent: CDCl<sub>3</sub>

Ambient temperature

User: 1-14-87

File: allylicOAc\_SM\_C

INOVA-500 "sunds1"

Relax. delay 1.000 sec

Pulse 45.0 degrees

Acq. time 1.024 sec

Width 32000.0 Hz

1470 repetitions

OBSERVE C13, 125.5817492 MHz

DECOUPLE H1, 499.4315638 MHz

Power 47 dB

continuously on

WALTZ-16 modulated

DATA PROCESSING

Line broadening 1.0 Hz

FT size 65536

Total time 3 hr, 36 min, 52 sec

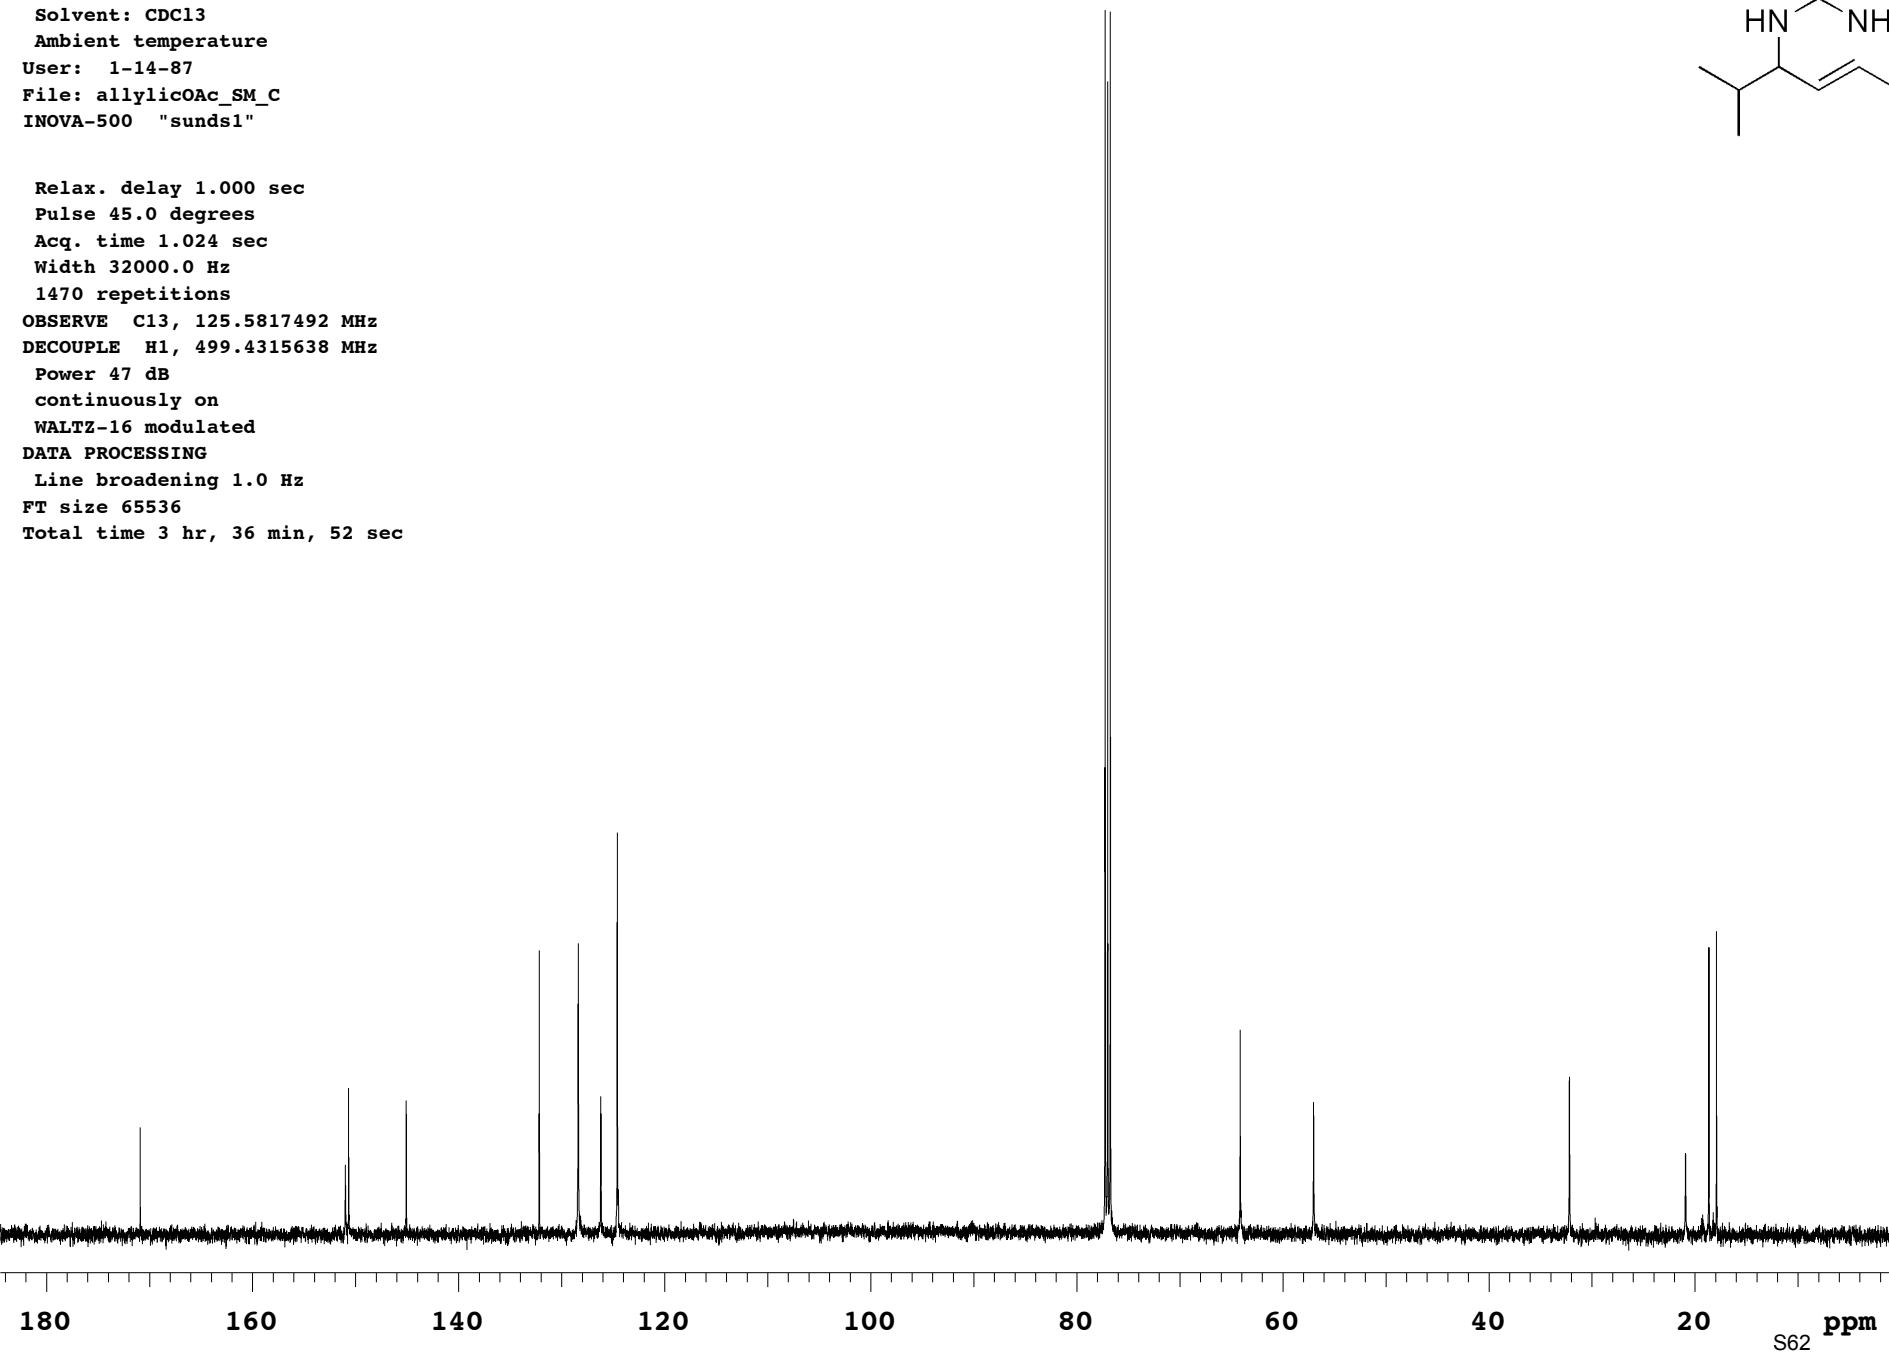

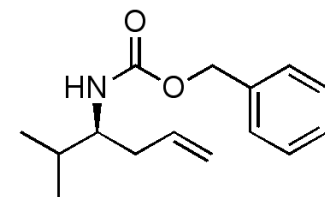

Pulse Sequence: s2pul

Solvent: CDC13

Ambient temperature

File: IIS.31.VIII.col

INOVA-500 "sunds1"

Relax. delay 5.000 sec

Pulse 90.0 degrees

Acq. time 4.096 sec

Width 8000.0 Hz

8 repetitions

OBSERVE H1, 500.0677748 MHz

DATA PROCESSING

Line broadening 0.3 Hz

FT size 65536

Total time 1 min, 12 sec

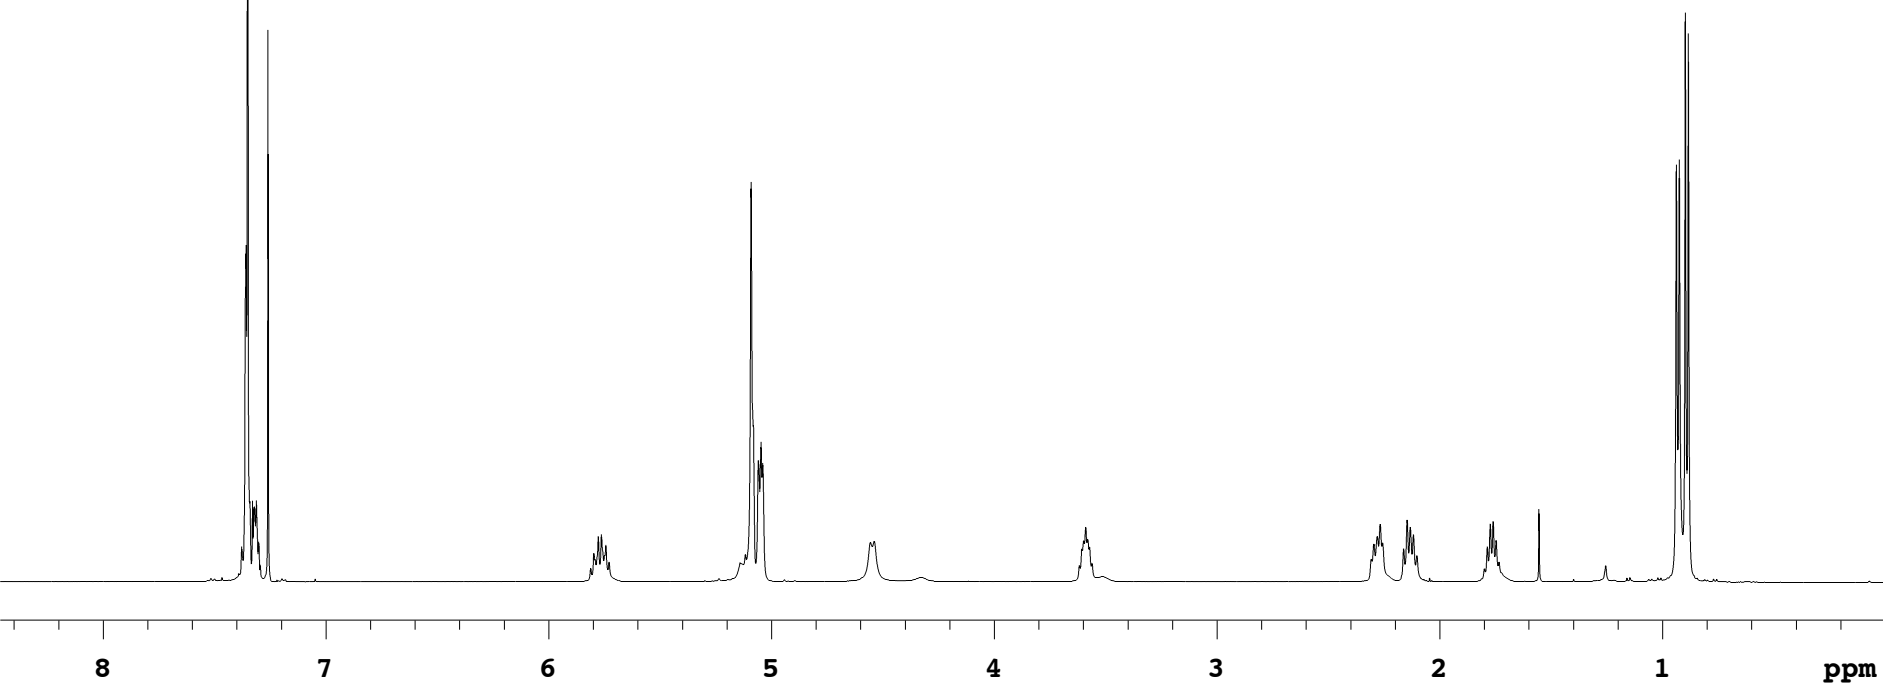

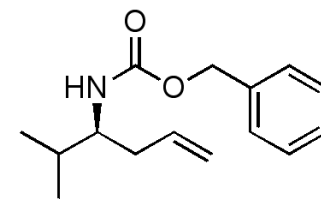

Pulse Sequence: s2pul

Solvent: CDC13

Ambient temperature

User: 1-14-87

File: IIS.31.VIII.col

INOVA-500 "sunds1"

Relax. delay 5.000 sec

Pulse 45.0 degrees

Acq. time 1.024 sec

Width 32000.0 Hz

182 repetitions

OBSERVE C13, 125.5817166 MHz

DECOUPLE H1, 499.4315638 MHz

Power 48 dB

continuously on

WALTZ-16 modulated

DATA PROCESSING

Line broadening 1.0 Hz

FT size 65536

Total time 1 hr, 40 min, 38 sec

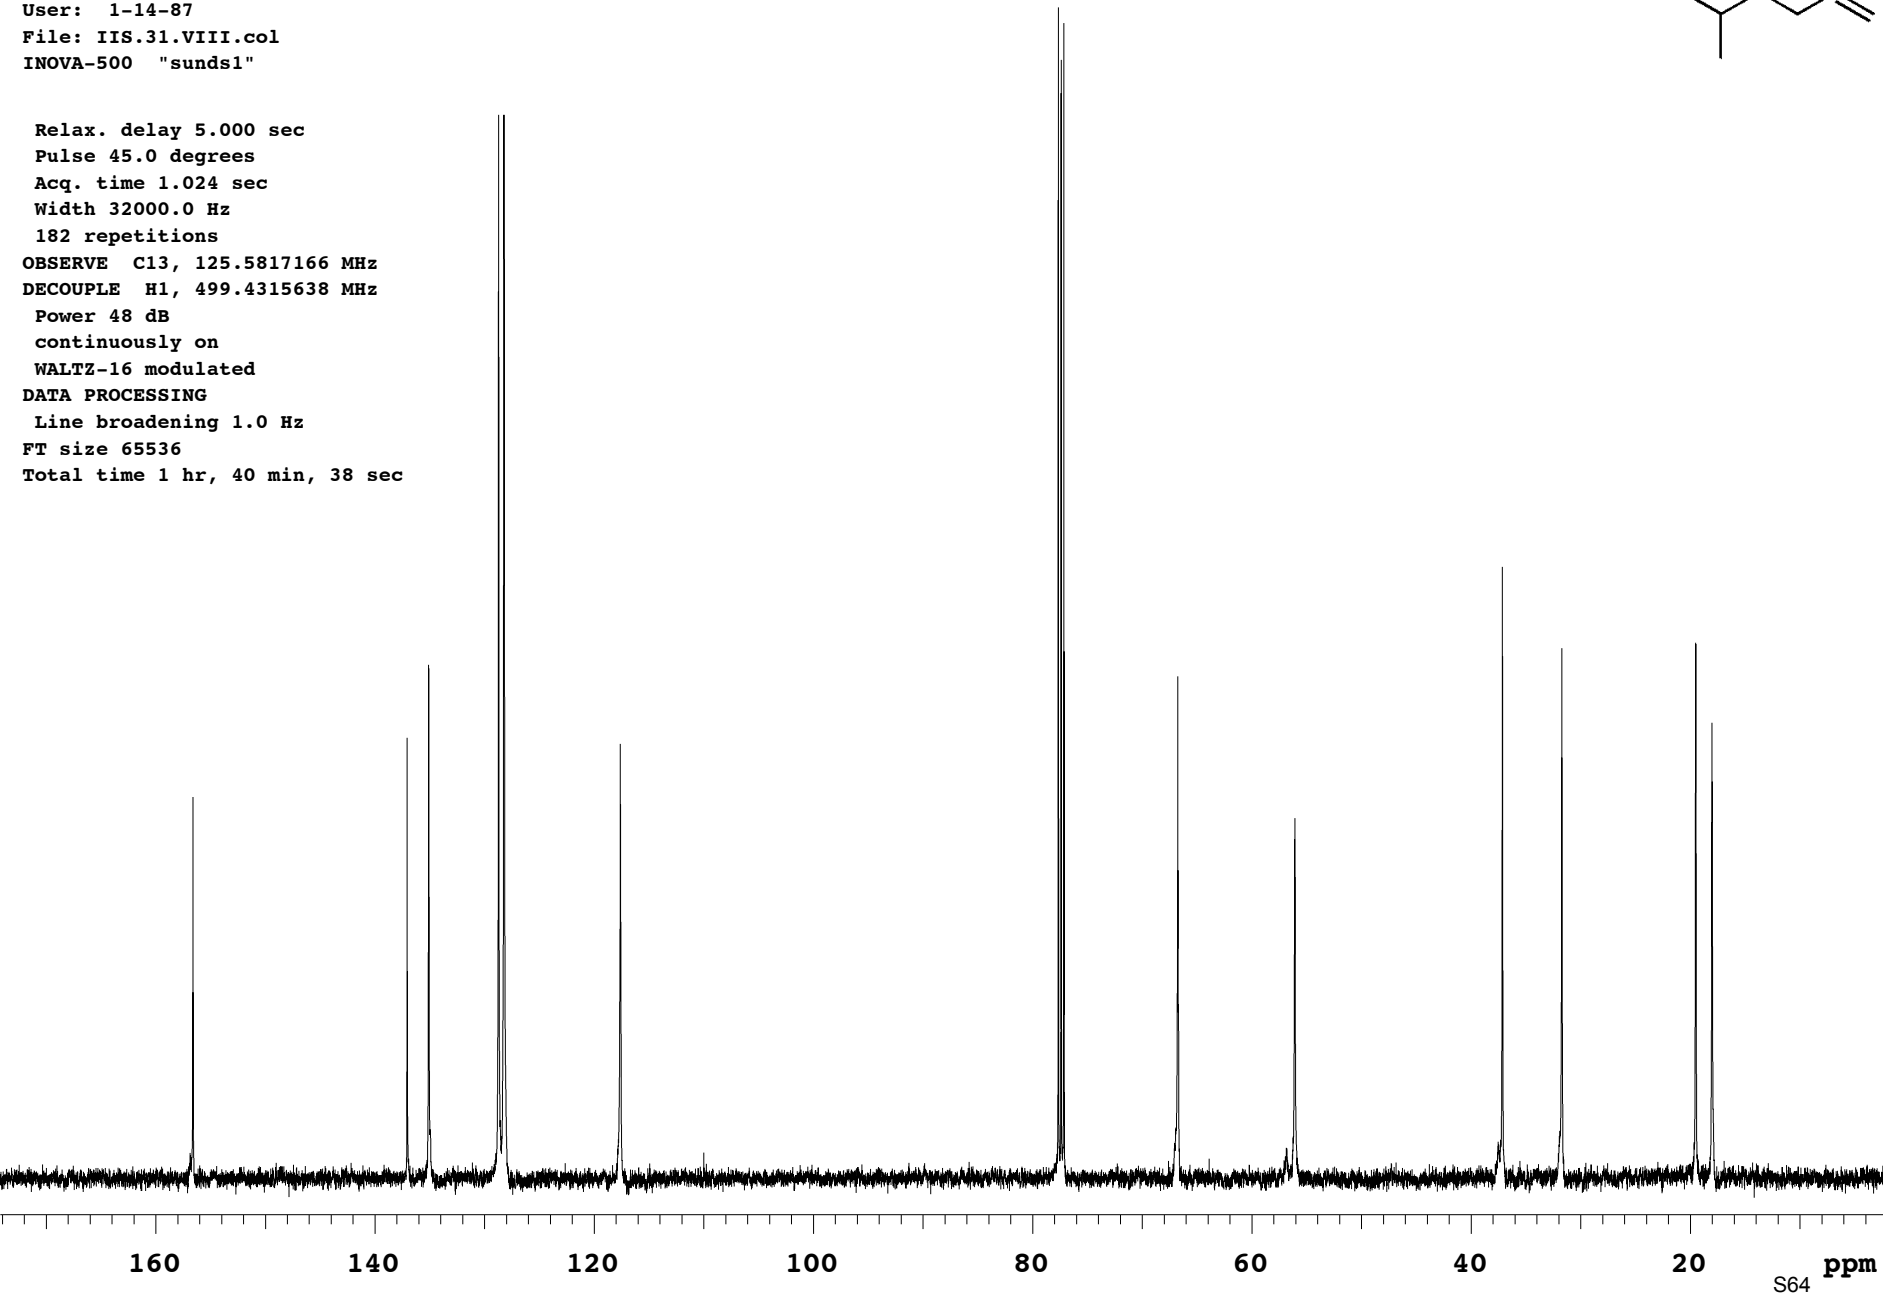

Pulse Sequence: s2pul

Solvent: CDCl<sub>3</sub>

Ambient temperature

File: iPrSynDiamine

INOVA-500 "sunds1"

Relax. delay 5.000 sec

Pulse 90.0 degrees

Acq. time 4.096 sec

Width 8000.0 Hz

16 repetitions

OBSERVE H1, 500.0677743 MHz

DATA PROCESSING

Line broadening 0.3 Hz

FT size 65536

Total time 2 min, 25 sec

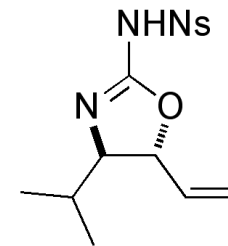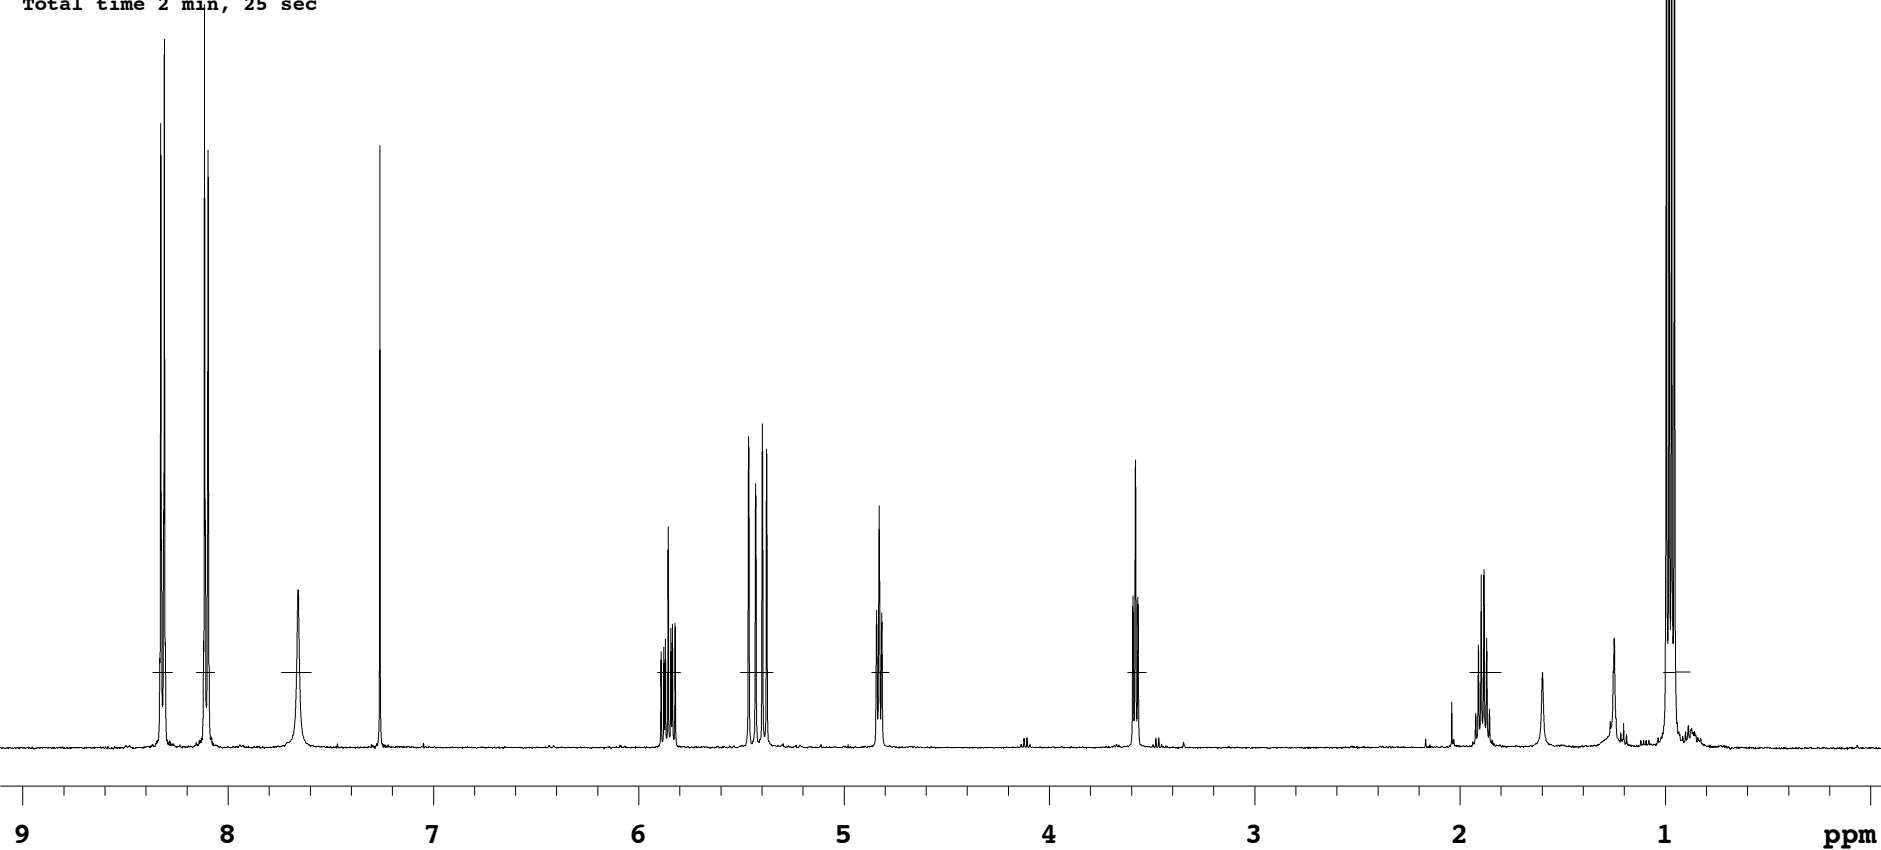



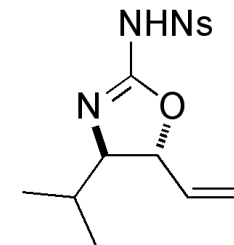

Pulse Sequence: s2pul

Solvent: CDCl<sub>3</sub>

Ambient temperature

User: 1-14-87

File: iPrSynDiamineCarb

INOVA-500 "sunds1"

Pulse 45.0 degrees

Acq. time 1.024 sec

Width 32000.0 Hz

544 repetitions

OBSERVE C13, 125.5817483 MHz

DECOUPLE H1, 499.4315638 MHz

Power 48 dB

continuously on

WALTZ-16 modulated

DATA PROCESSING

Line broadening 1.0 Hz

FT size 65536

Total time 2 hr, 52 min, 10 sec

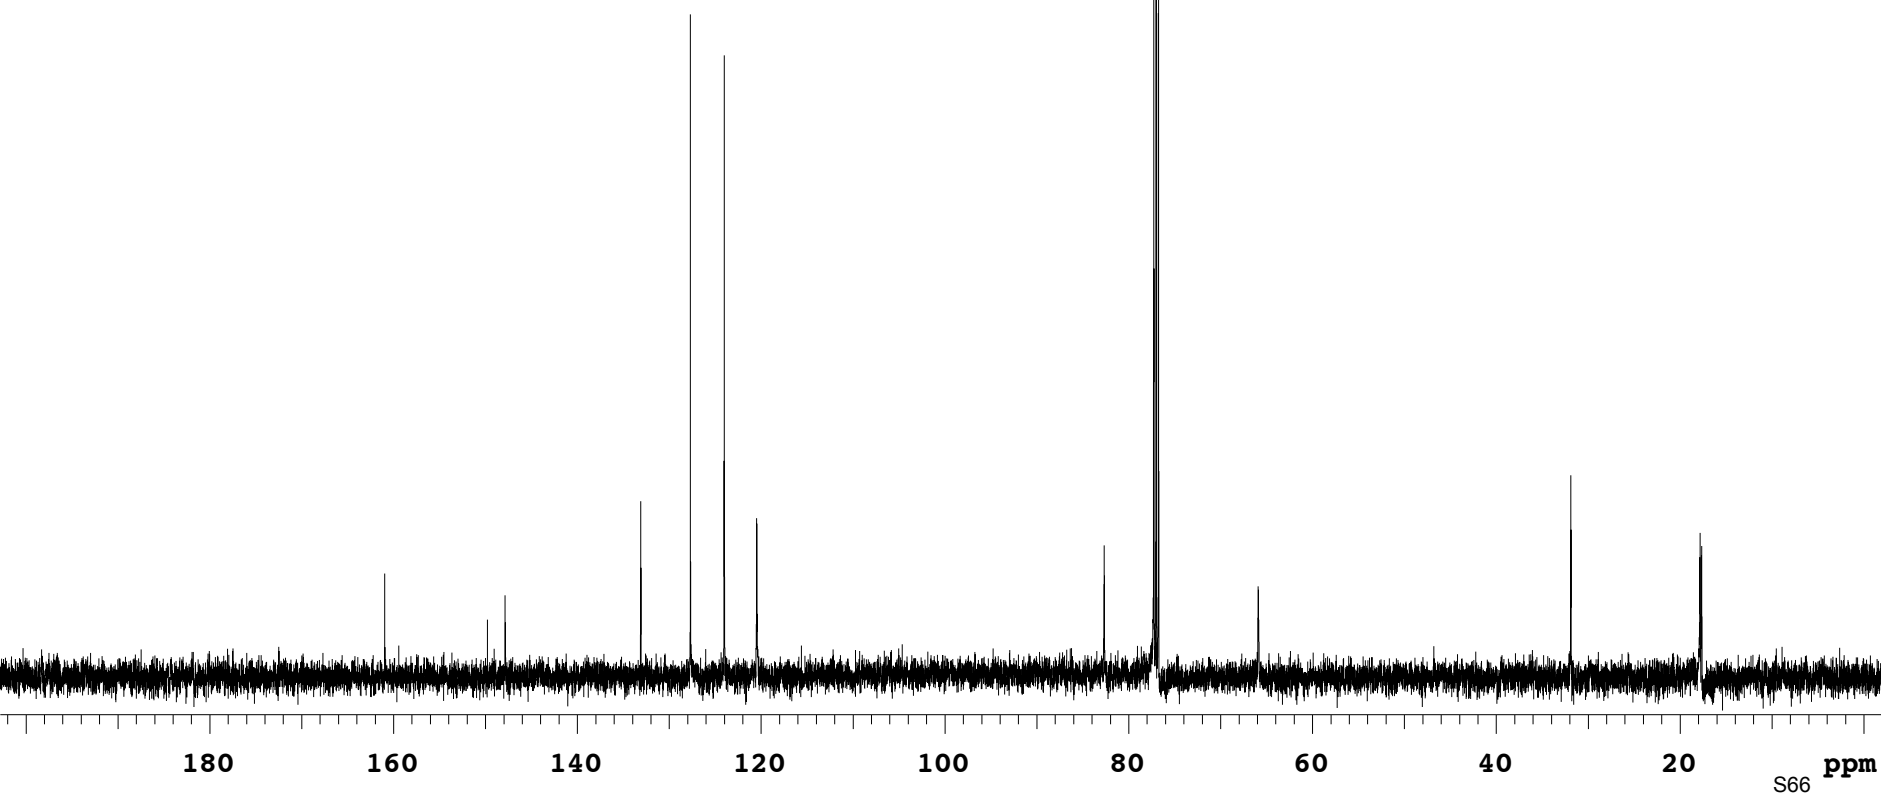

Strambeanu and White

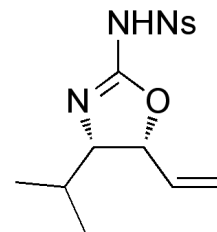

Pulse Sequence: s2pul

Solvent: CDCl3

Ambient temperature

File: syn\_oxazoline

INOVA-500 "sunds1"

Relax. delay 5.000 sec

Pulse 90.0 degrees

Acq. time 4.096 sec

Width 8000.0 Hz

8 repetitions

OBSERVE H1, 500.0677753 MHz

DATA PROCESSING

Line broadening 0.3 Hz

FT size 65536

Total time 1 min, 12 sec

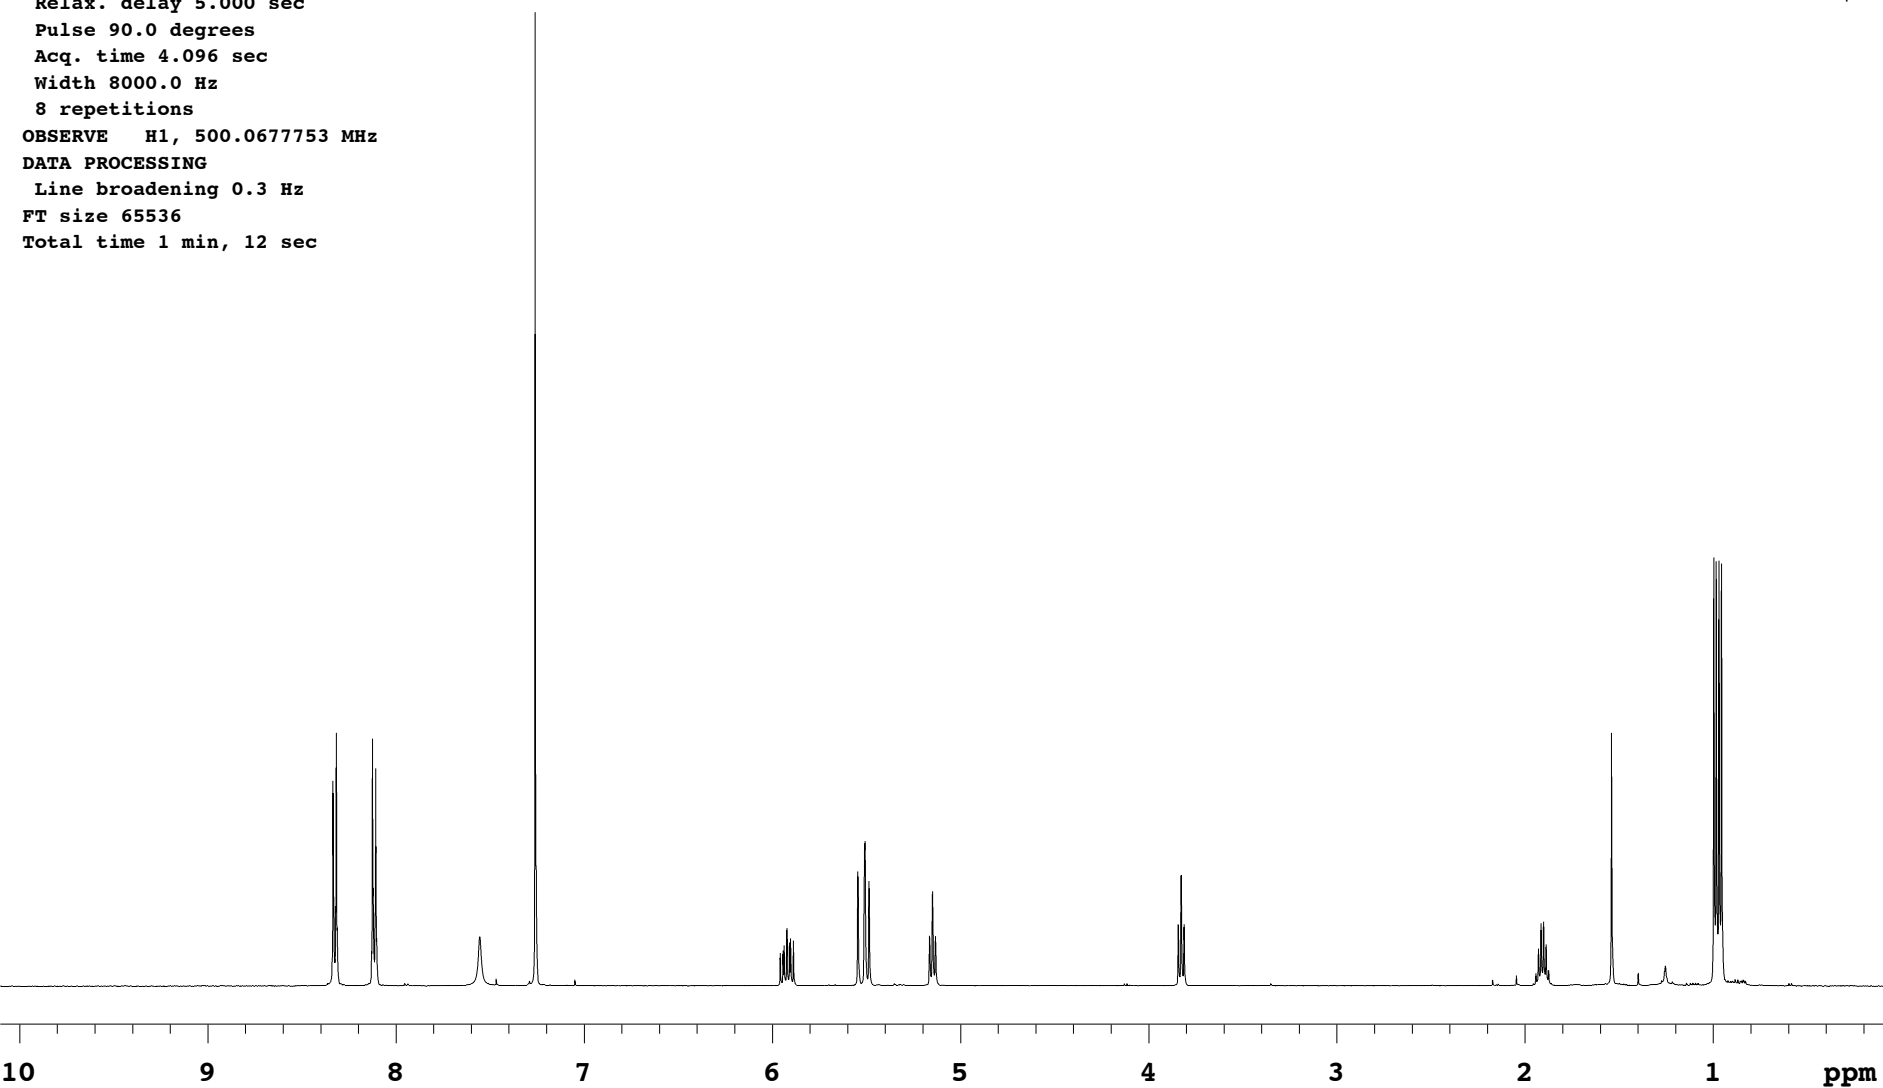

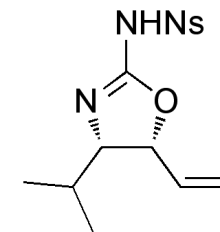

Pulse Sequence: s2pul

Solvent: CDCl<sub>3</sub>

Ambient temperature

User: 1-14-87

INOVA-500 "vxr500"

Relax. delay 1.000 sec

Pulse 45.0 degrees

Acq. time 1.024 sec

Width 32000.0 Hz

1240 repetitions

OBSERVE C13, 125.5817483 MHz

DECOUPLE H1, 499.4315638 MHz

Power 47 dB

continuously on

WALTZ-16 modulated

DATA PROCESSING

Line broadening 1.0 Hz

FT size 65536

Total time 3 hr, 36 min, 52 sec

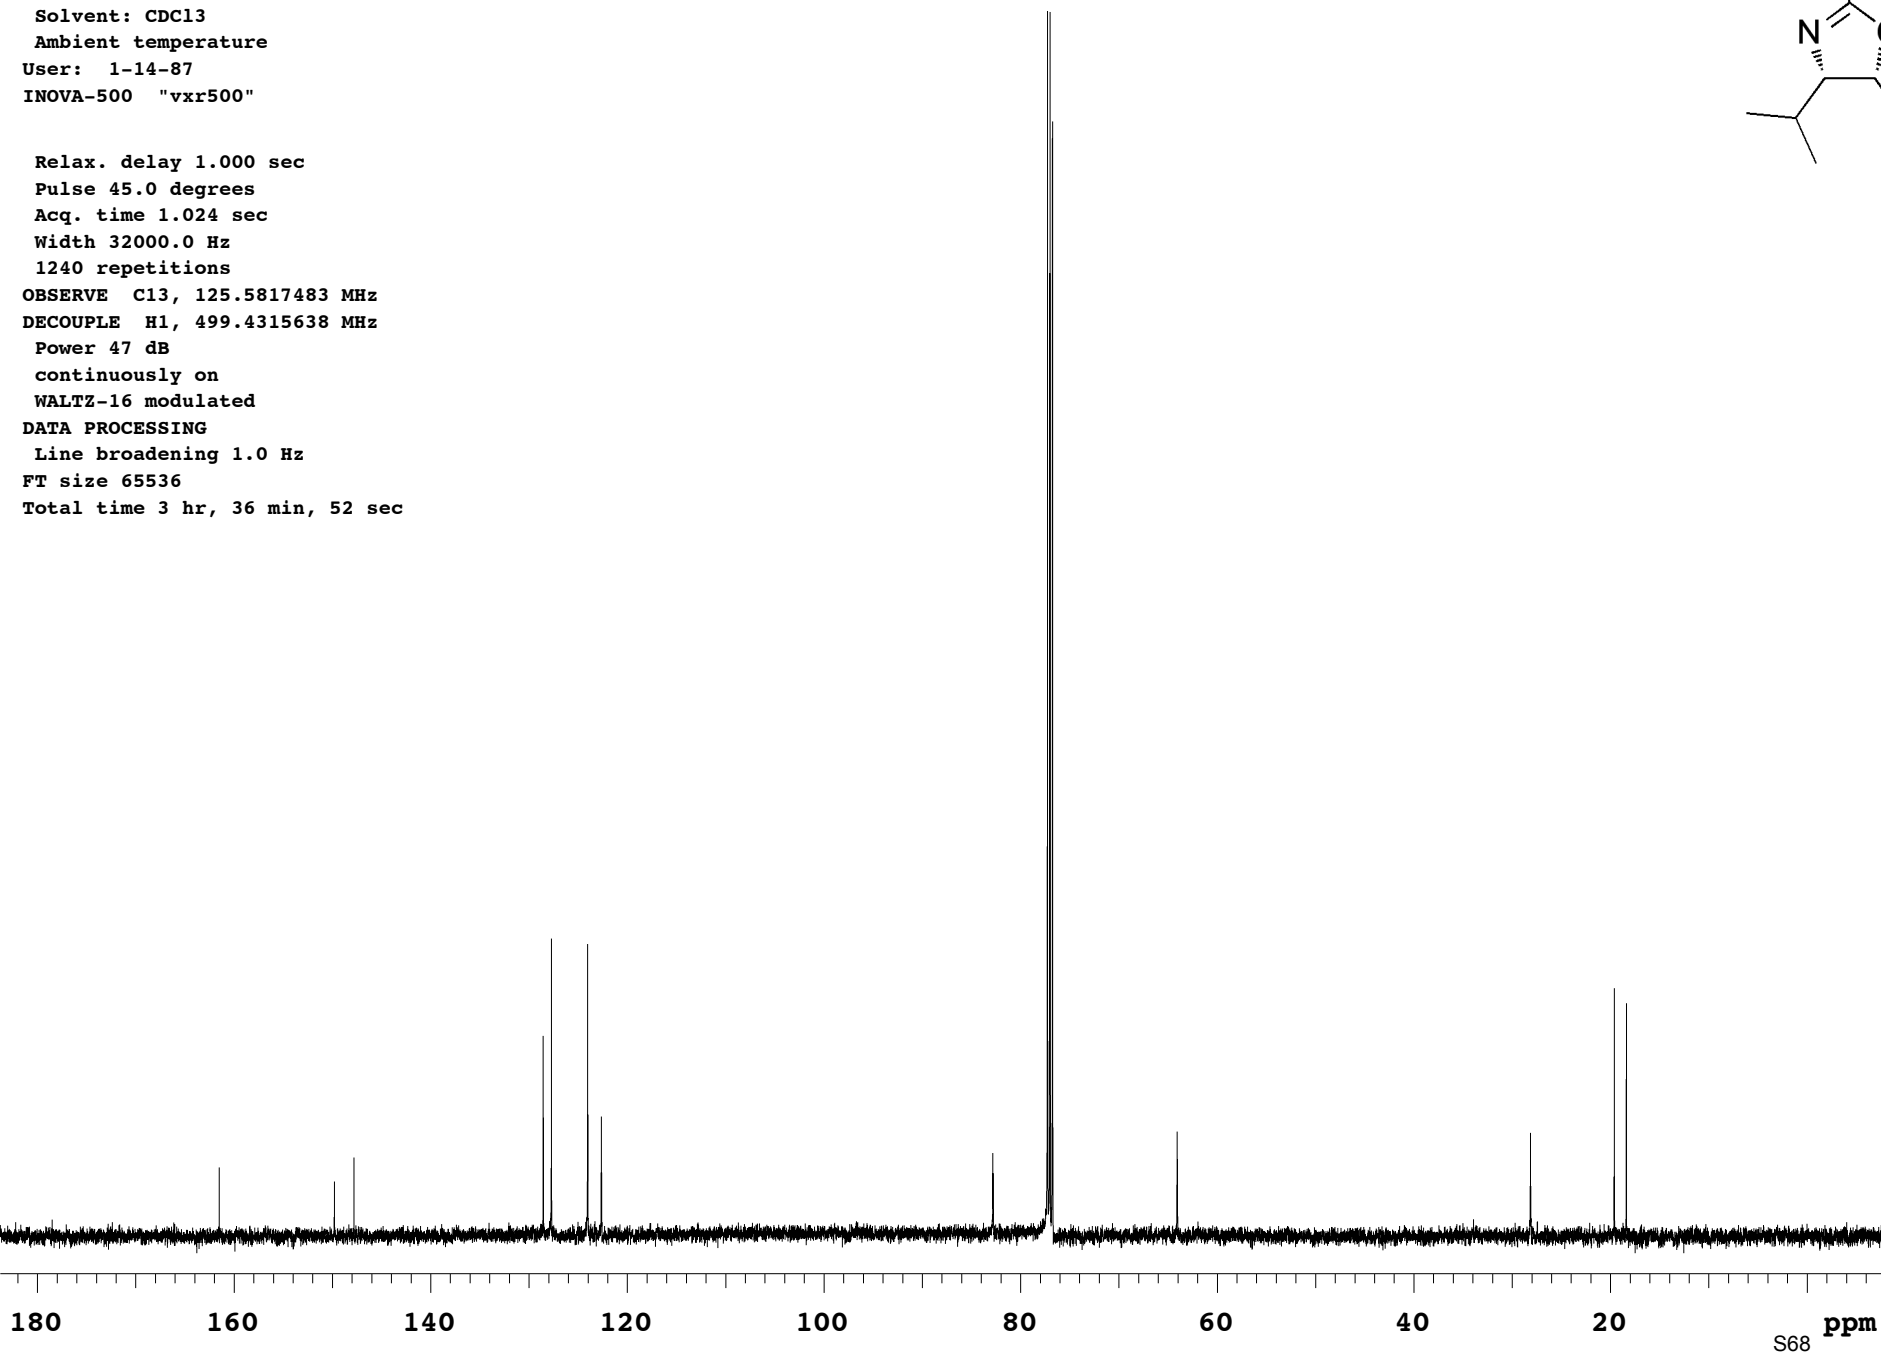

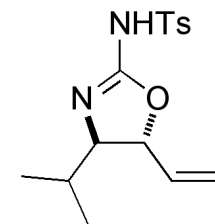

Pulse Sequence: s2pul

Solvent: CDCl<sub>3</sub>

Ambient temperature

File: iPrTs\_oxazoline\_H

INOVA-500 "sunds1"

Relax. delay 5.000 sec

Pulse 90.0 degrees

Acq. time 4.096 sec

Width 8000.0 Hz

6 repetitions

OBSERVE H1, 500.0677753 MHz

DATA PROCESSING

Line broadening 0.3 Hz

FT size 65536

Total time 1 min, 12 sec

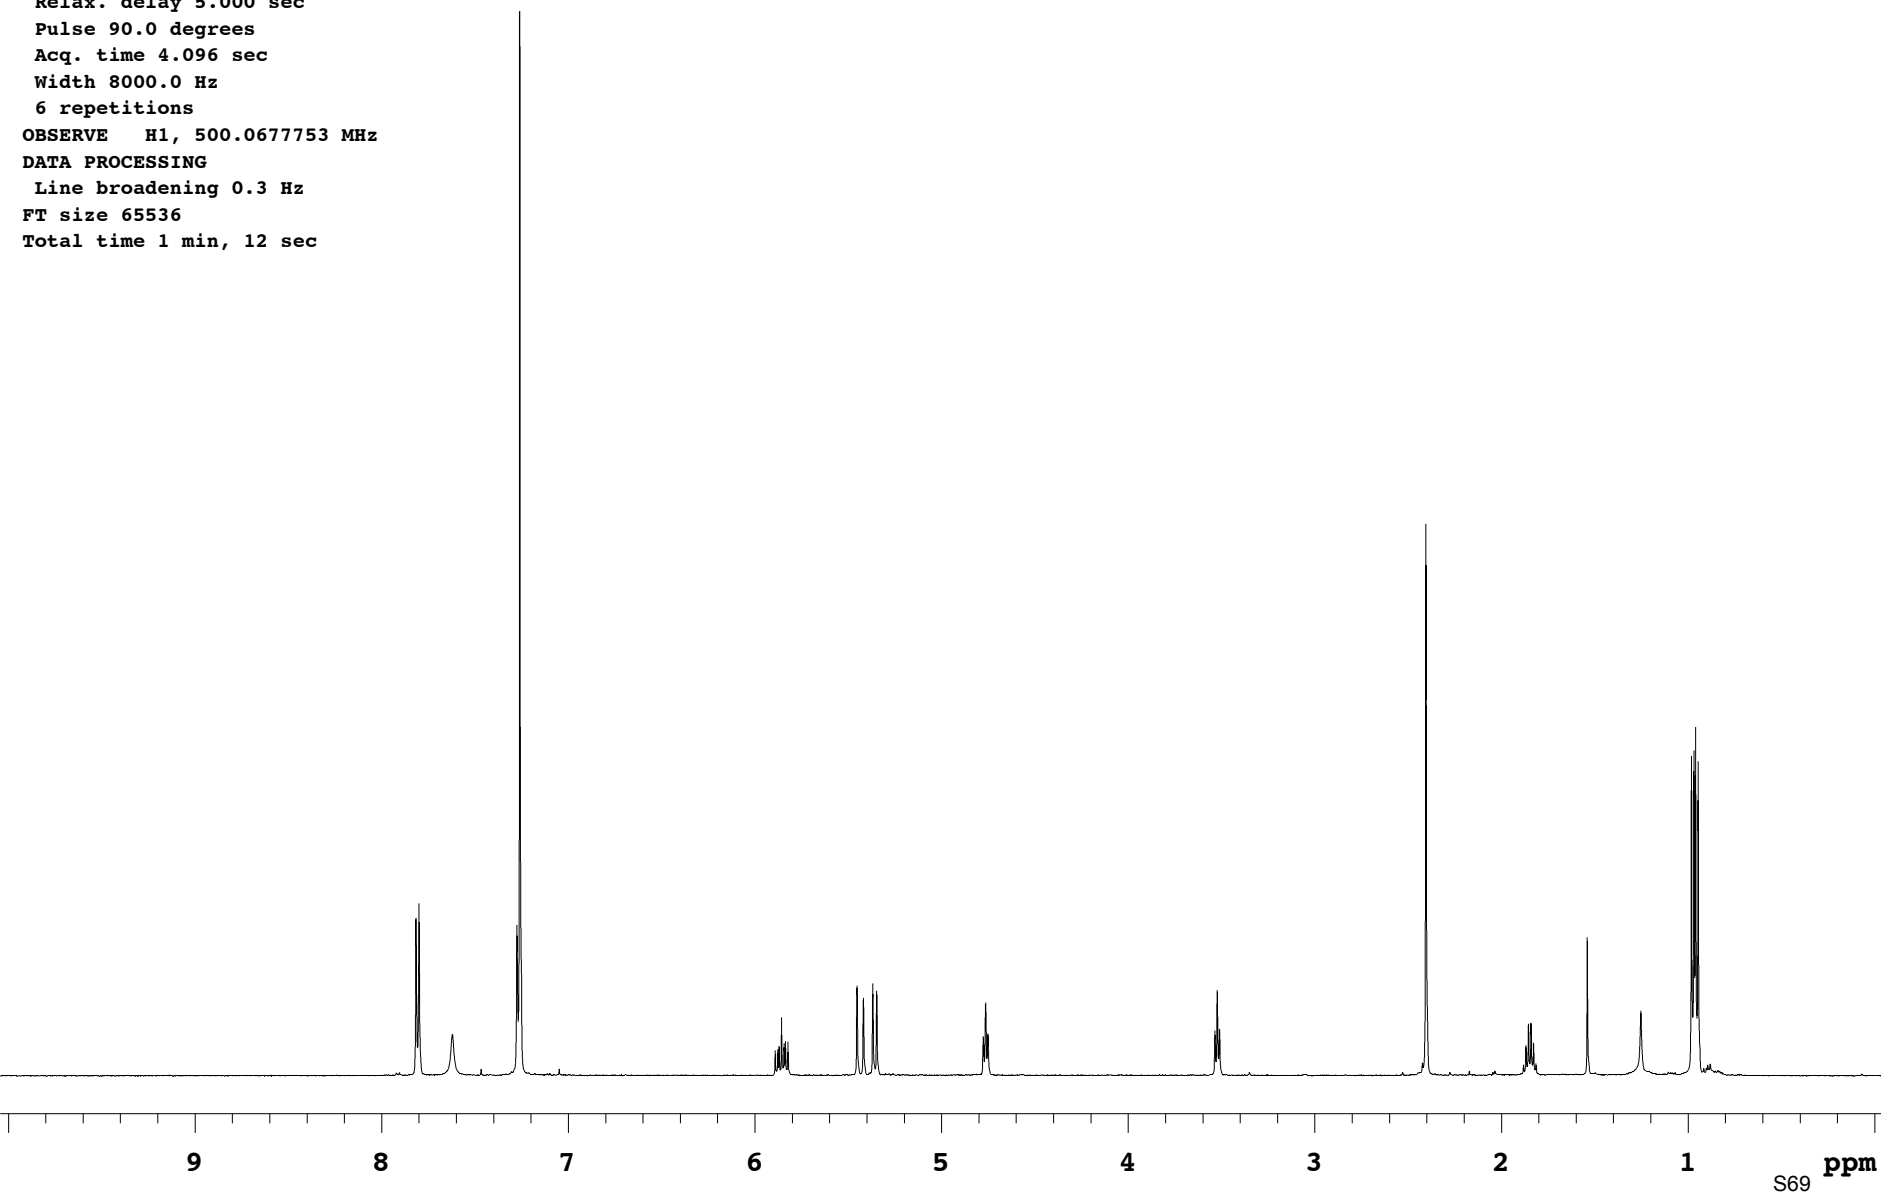

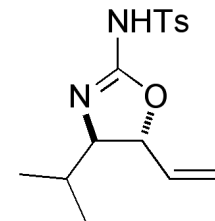

Pulse Sequence: s2pul

Solvent: CDCl<sub>3</sub>

Ambient temperature

User: 1-14-87

File: iPrTs\_ox\_C1

INOVA-500 "sunds1"

Relax. delay 1.000 sec

Pulse 28.1 degrees

Acq. time 1.086 sec

Width 30165.9 Hz

1000 repetitions

OBSERVE C13, 125.6473193 MHz

DECOUPLE H1, 499.6923275 MHz

Power 45 dB

continuously on

WALTZ-16 modulated

DATA PROCESSING

Line broadening 1.0 Hz

FT size 65536

Total time 3 hr, 43 min, 31 sec

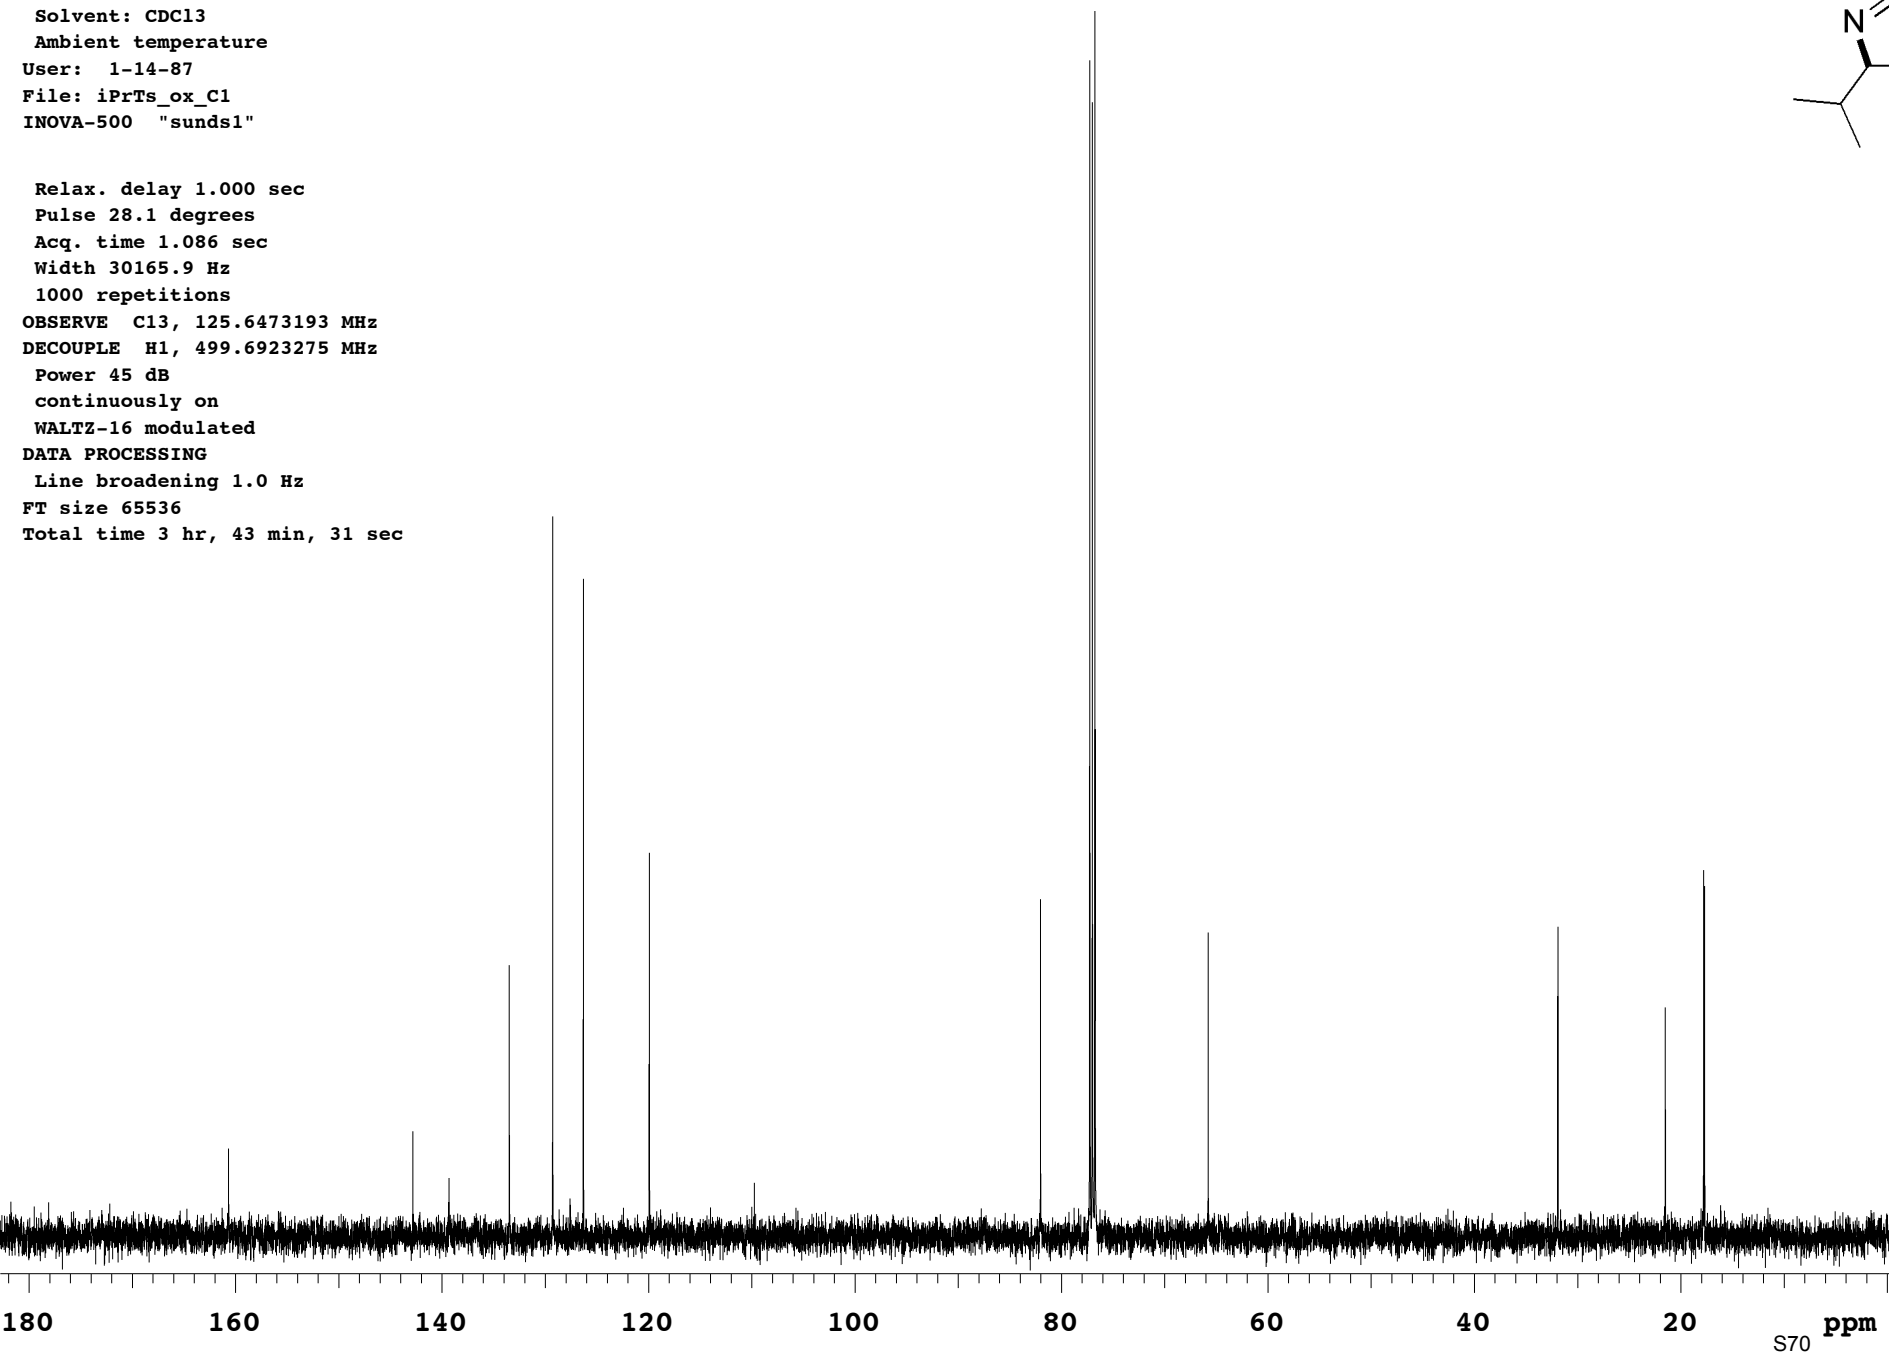

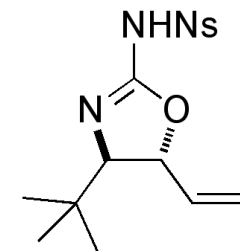

Pulse Sequence: s2pul

Solvent: CDCl<sub>3</sub>

Ambient temperature

File: tBuSynDiamine

INOVA-500 "sunds1"

Relax. delay 10.000 sec

Pulse 61.6 degrees

Acq. time 4.665 sec

Width 7024.9 Hz

12 repetitions

OBSERVE H1, 499.6906566 MHz

DATA PROCESSING

Line broadening 0.3 Hz

FT size 65536

Total time 3 min, 54 sec

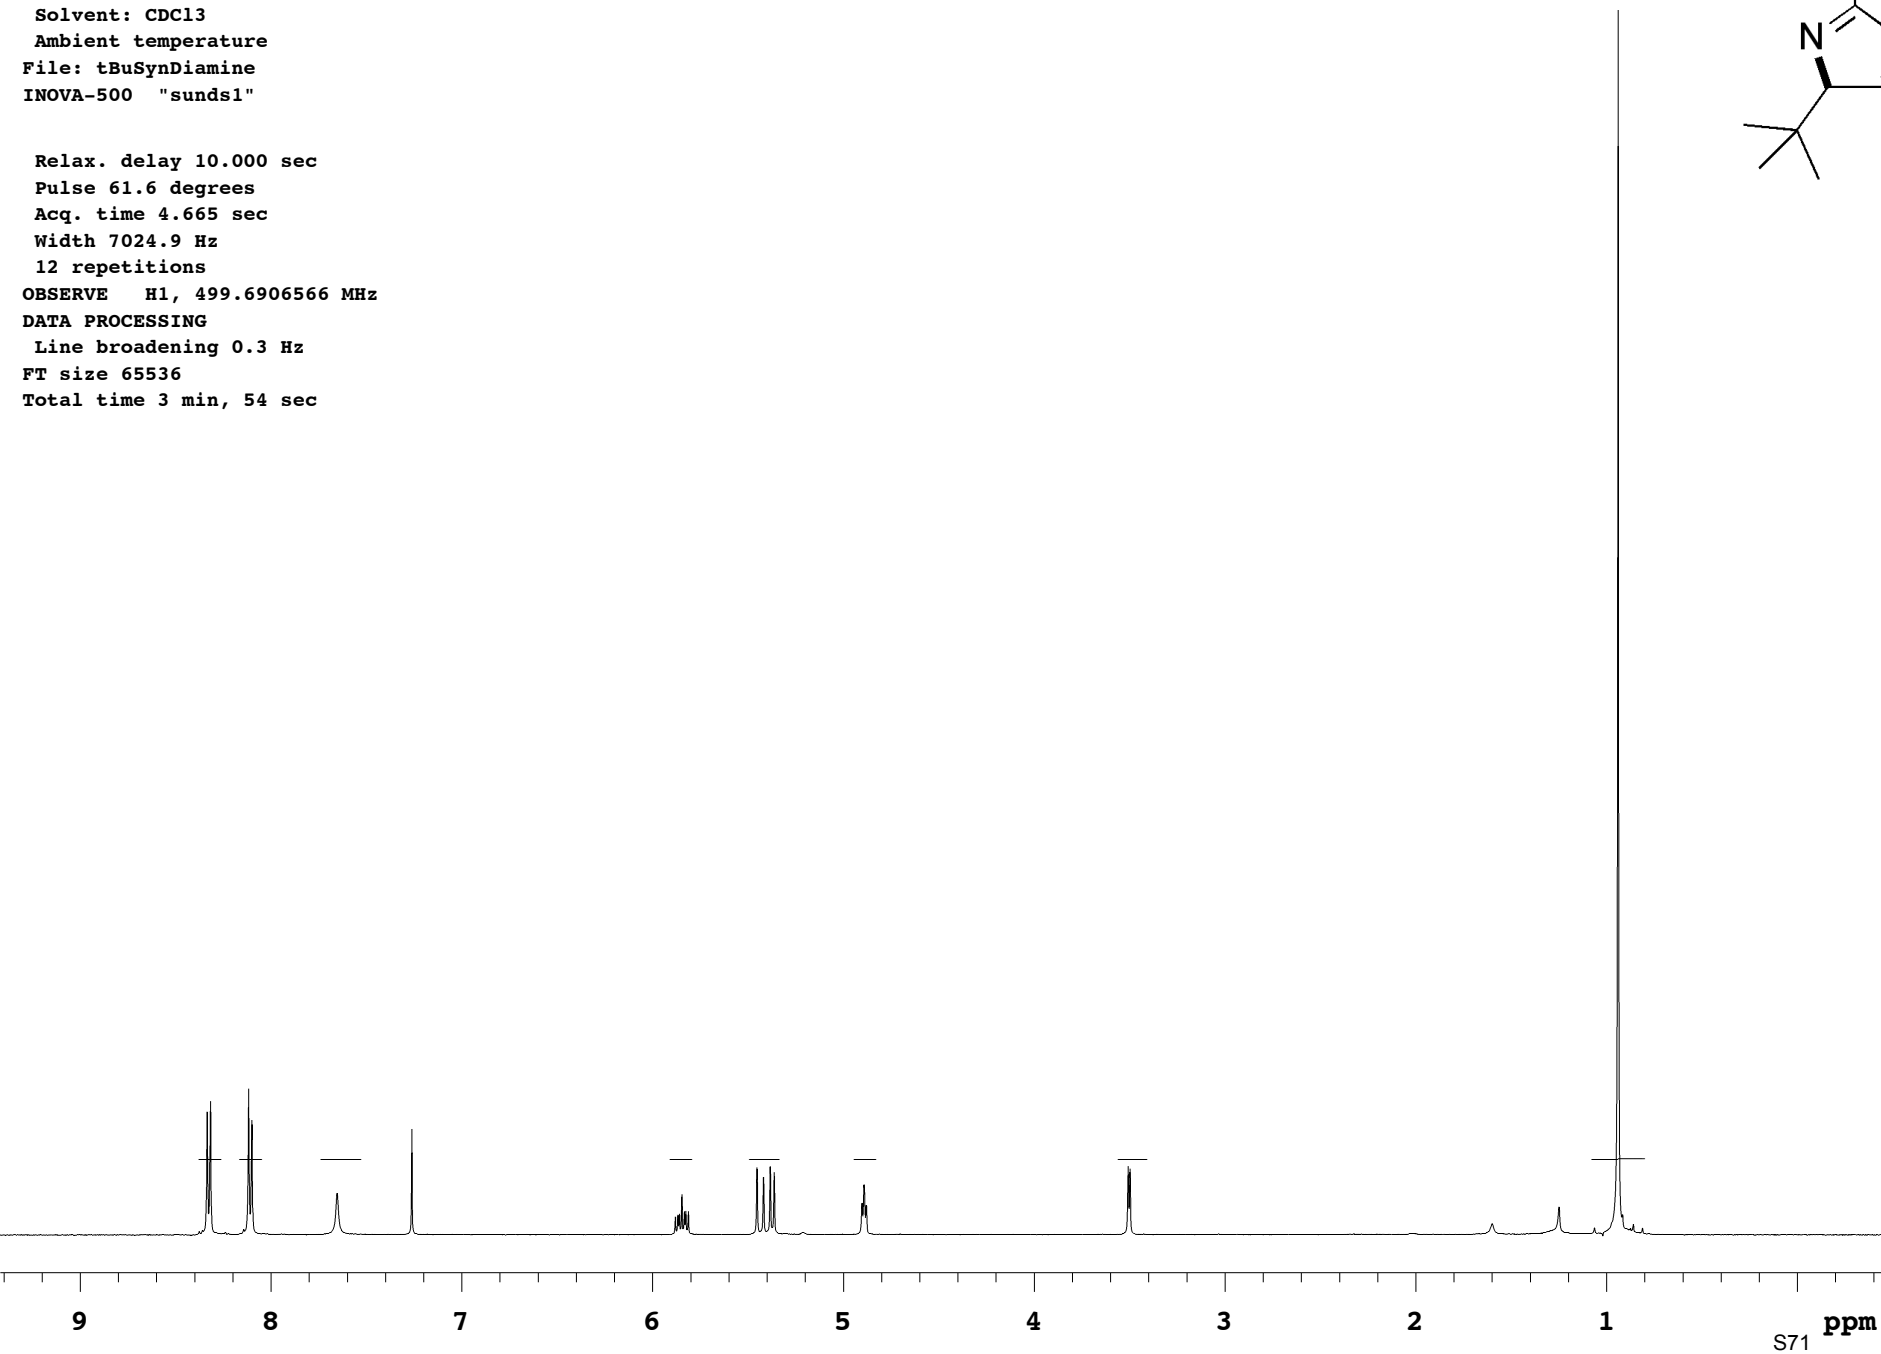

Pulse Sequence: s2pul

Solvent: CDCl3

Ambient temperature

User: 1-14-87

File: tBuSynDiamineCarb

INOVA-500 "sunds1"

Relax. delay 1.000 sec

Pulse 65.9 degrees

Acq. time 1.086 sec

Width 30165.9 Hz

414 repetitions

OBSERVE C13, 125.6473020 MHz

DECOUPLE H1, 499.6923275 MHz

Power 44 dB

continuously on

WALTZ-16 modulated

DATA PROCESSING

Line broadening 1.0 Hz

FT size 65536

Total time 5 hr, 49 min, 13 sec

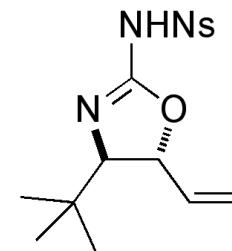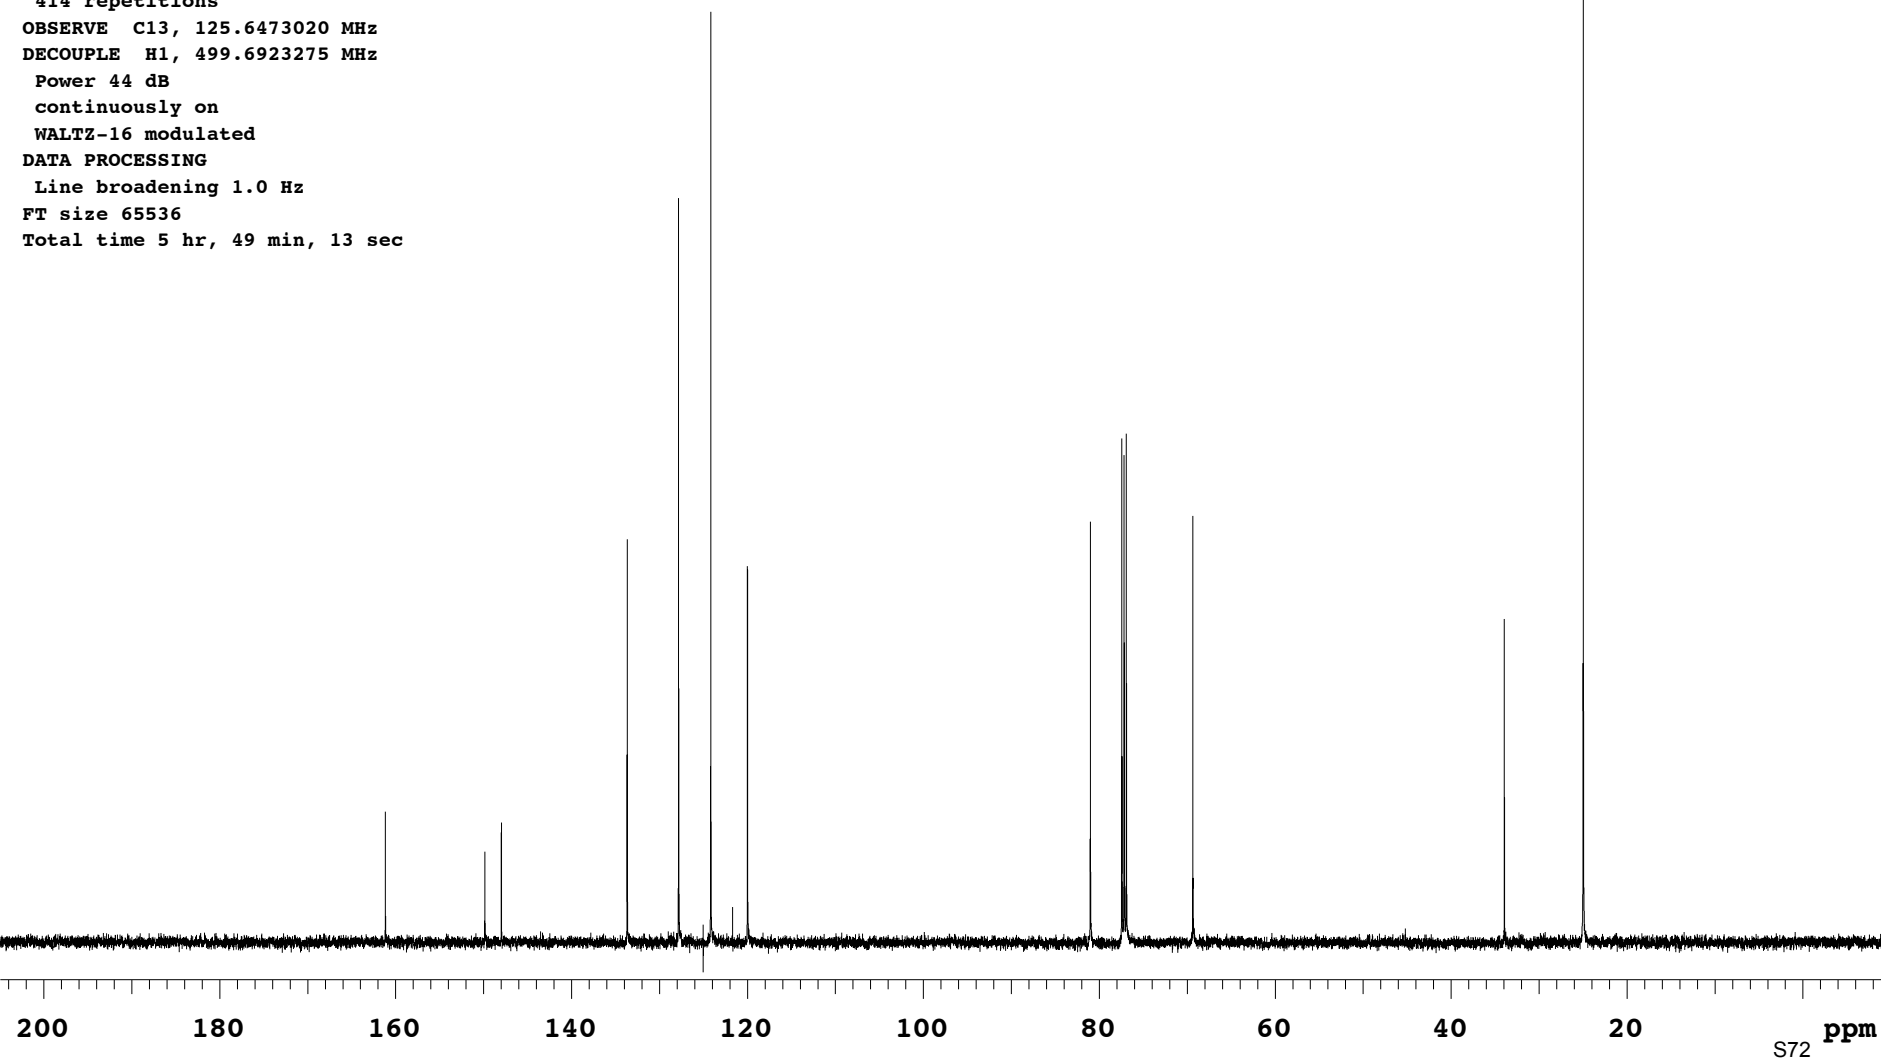

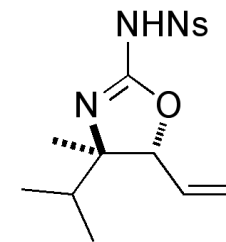

Pulse Sequence: s2pul

Solvent: CDCl3

Ambient temperature

File: TertiarySynDiamine

INOVA-500 "sunds1"

Relax. delay 10.000 sec

Pulse 45.0 degrees

Acq. time 4.096 sec

Width 8000.0 Hz

16 repetitions

OBSERVE H1, 499.4298935 MHz

DATA PROCESSING

Line broadening 0.3 Hz

FT size 65536

Total time 3 min, 45 sec

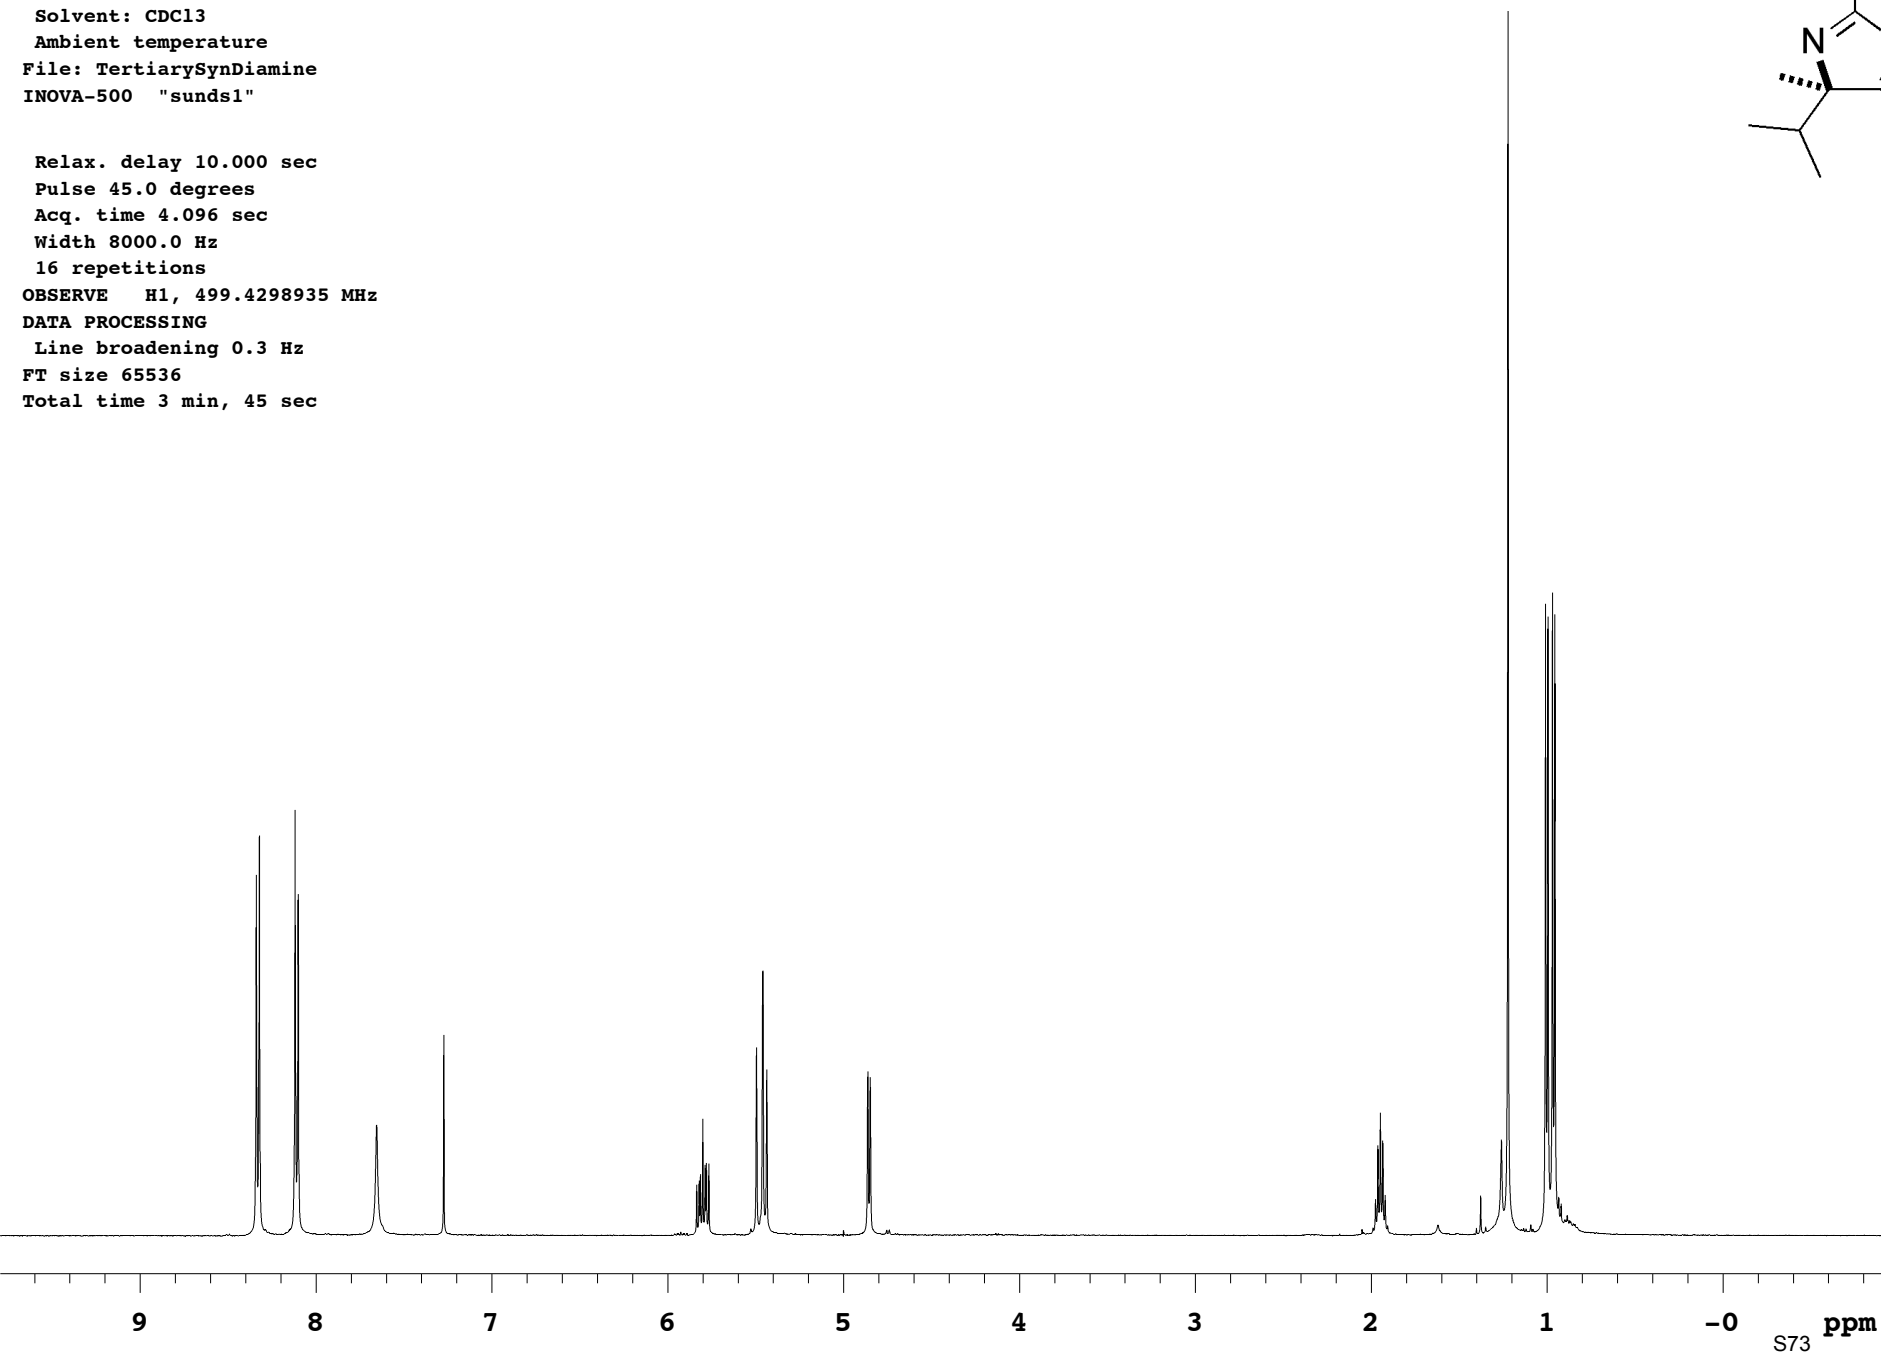



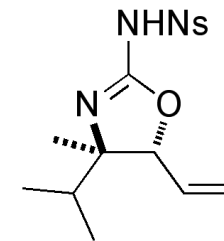

Pulse Sequence: s2pul

Solvent: CDCl<sub>3</sub>

Ambient temperature

User: 1-14-87

File: TertiarySynDiamineCarb

INOVA-500 "sunds1"

Relax. delay 1.000 sec

Pulse 45.0 degrees

Acq. time 1.024 sec

Width 32000.0 Hz

498 repetitions

OBSERVE C13, 125.5817185 MHz

DECOUPLE H1, 499.4315638 MHz

Power 44 dB

continuously on

WALTZ-16 modulated

DATA PROCESSING

Line broadening 1.0 Hz

FT size 65536

Total time 33 min, 54 sec

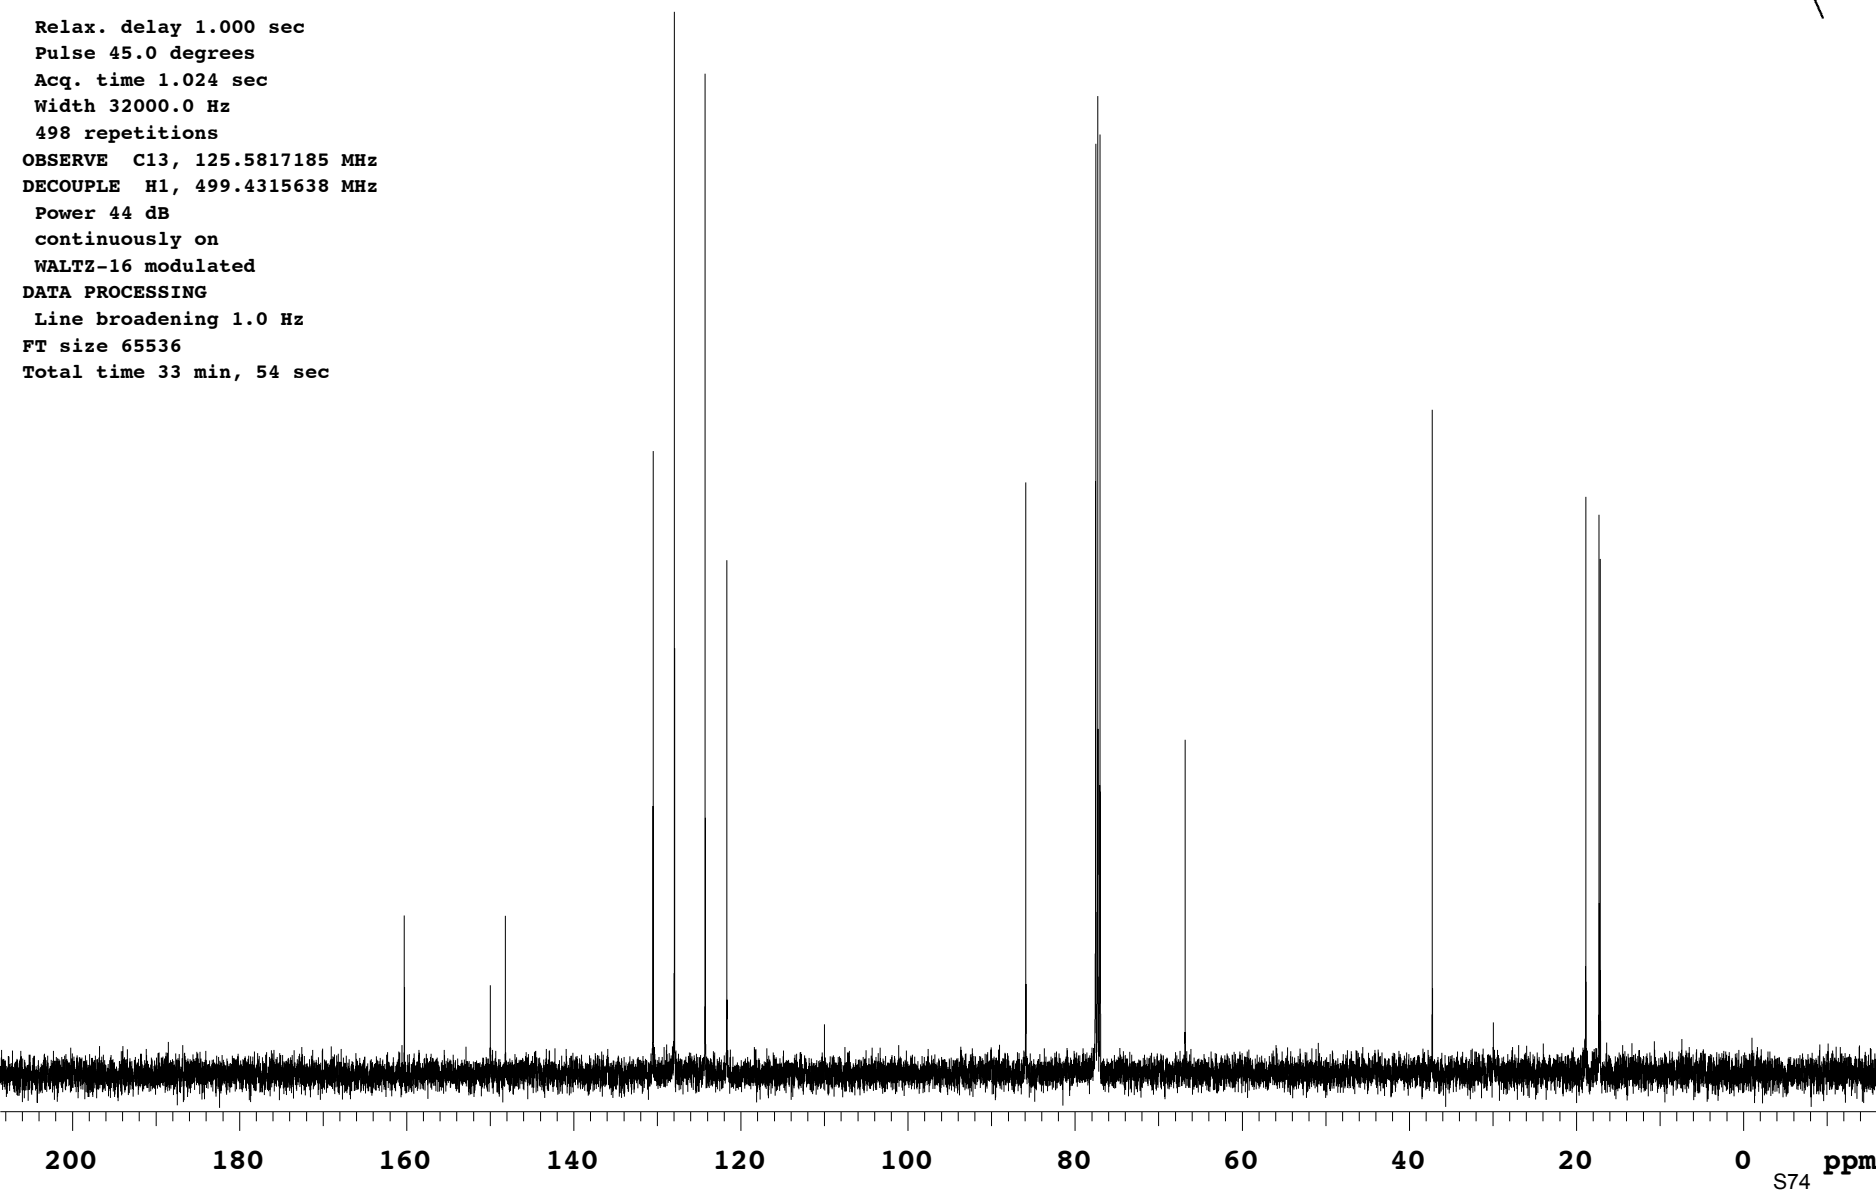

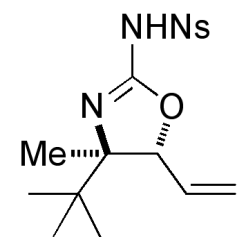

Pulse Sequence: s2pul

Solvent: CDCl3

Ambient temperature

File: tBuMe\_P\_H1

INOVA-500 "sunds1"

Relax. delay 5.000 sec

Pulse 90.0 degrees

Acq. time 4.096 sec

Width 8000.0 Hz

6 repetitions

OBSERVE H1, 500.0677753 MHz

DATA PROCESSING

Line broadening 0.3 Hz

FT size 65536

Total time 1 min, 12 sec

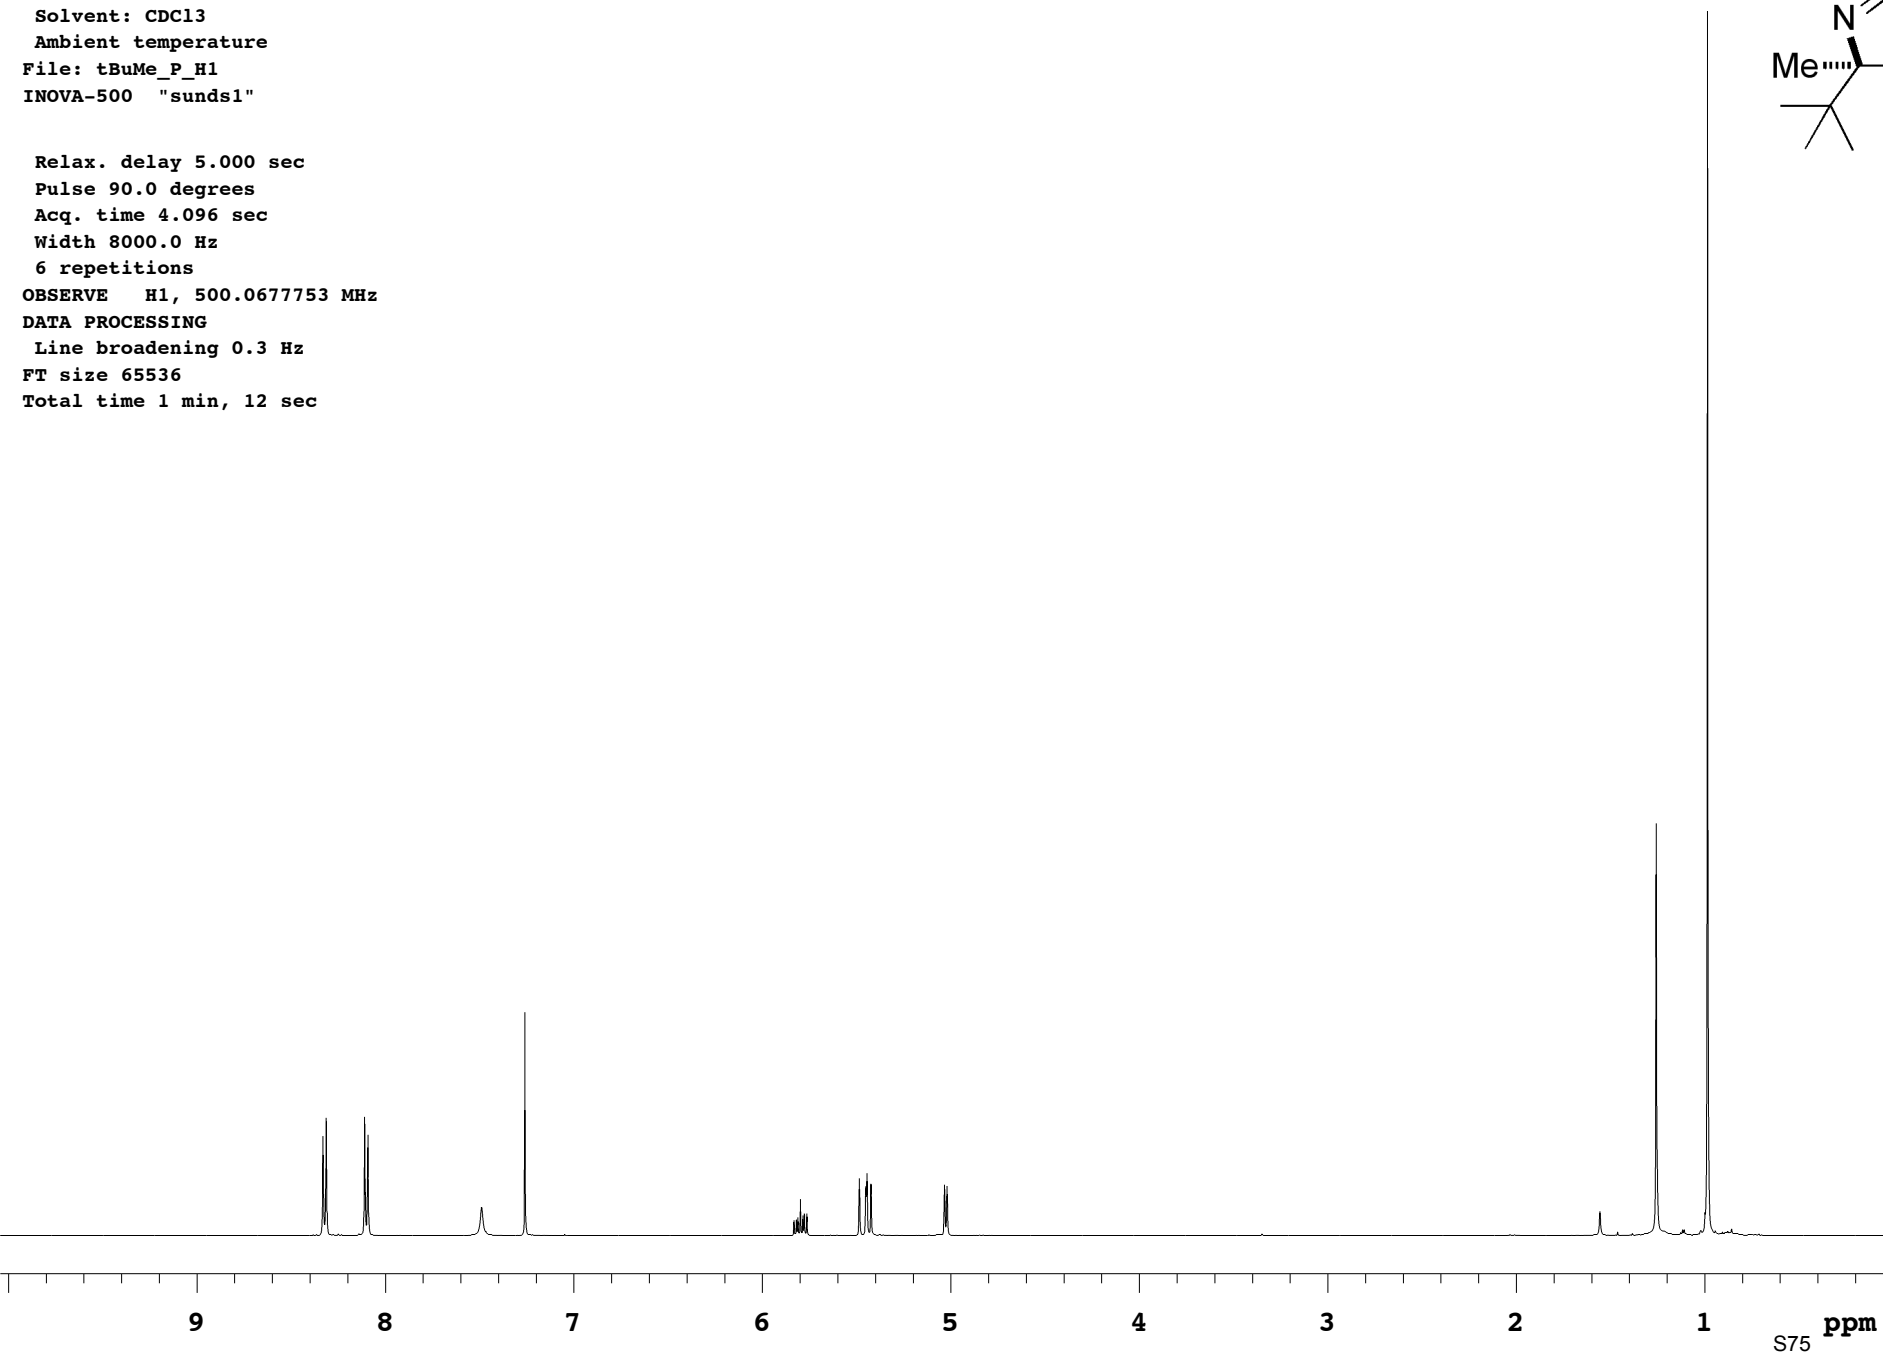

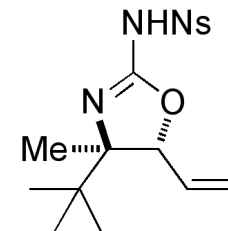

Pulse Sequence: s2pul

Solvent: CDCl<sub>3</sub>

Ambient temperature

User: 1-14-87

INOVA-500 "vxr500"

Relax. delay 5.000 sec

Pulse 45.0 degrees

Acq. time 1.024 sec

Width 32000.0 Hz

250 repetitions

OBSERVE C13, 125.5817473 MHz

DECOUPLE H1, 499.4315638 MHz

Power 47 dB

continuously on

WALTZ-16 modulated

DATA PROCESSING

Line broadening 1.0 Hz

FT size 65536

Total time 25 min, 14 sec

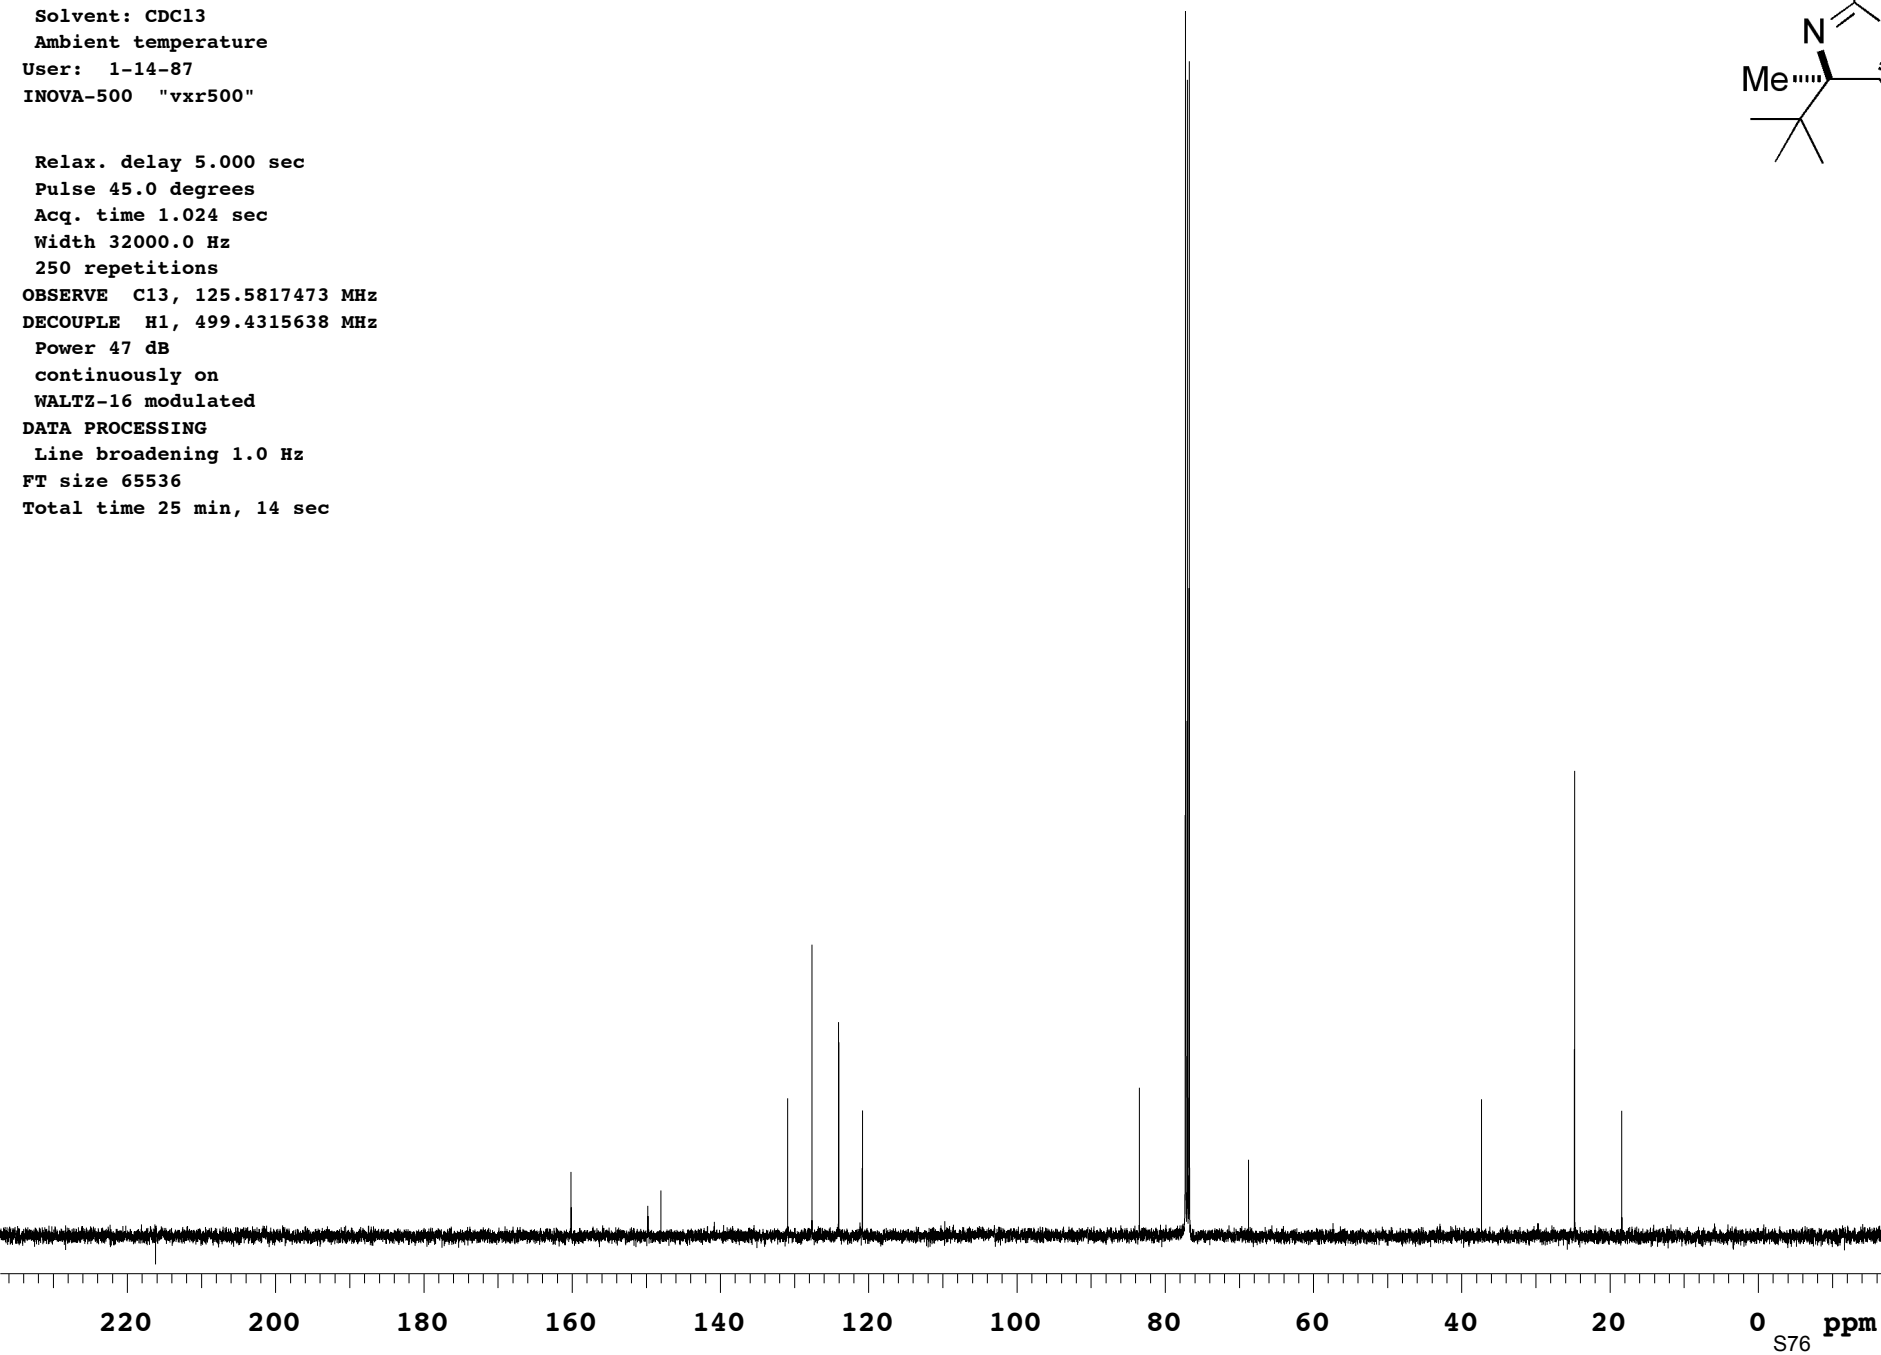

Pulse Sequence: s2pul

Solvent: CDCl3

Ambient temperature

File: OMePh\_P\_H1

INOVA-500 "sunds1"

Relax. delay 5.000 sec

Pulse 90.0 degrees

Acq. time 4.096 sec

Width 8000.0 Hz

8 repetitions

OBSERVE H1, 500.0677755 MHz

DATA PROCESSING

Line broadening 0.3 Hz

FT size 65536

Total time 1 min, 12 sec

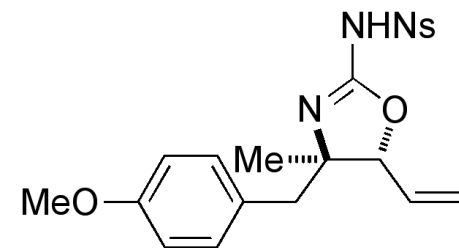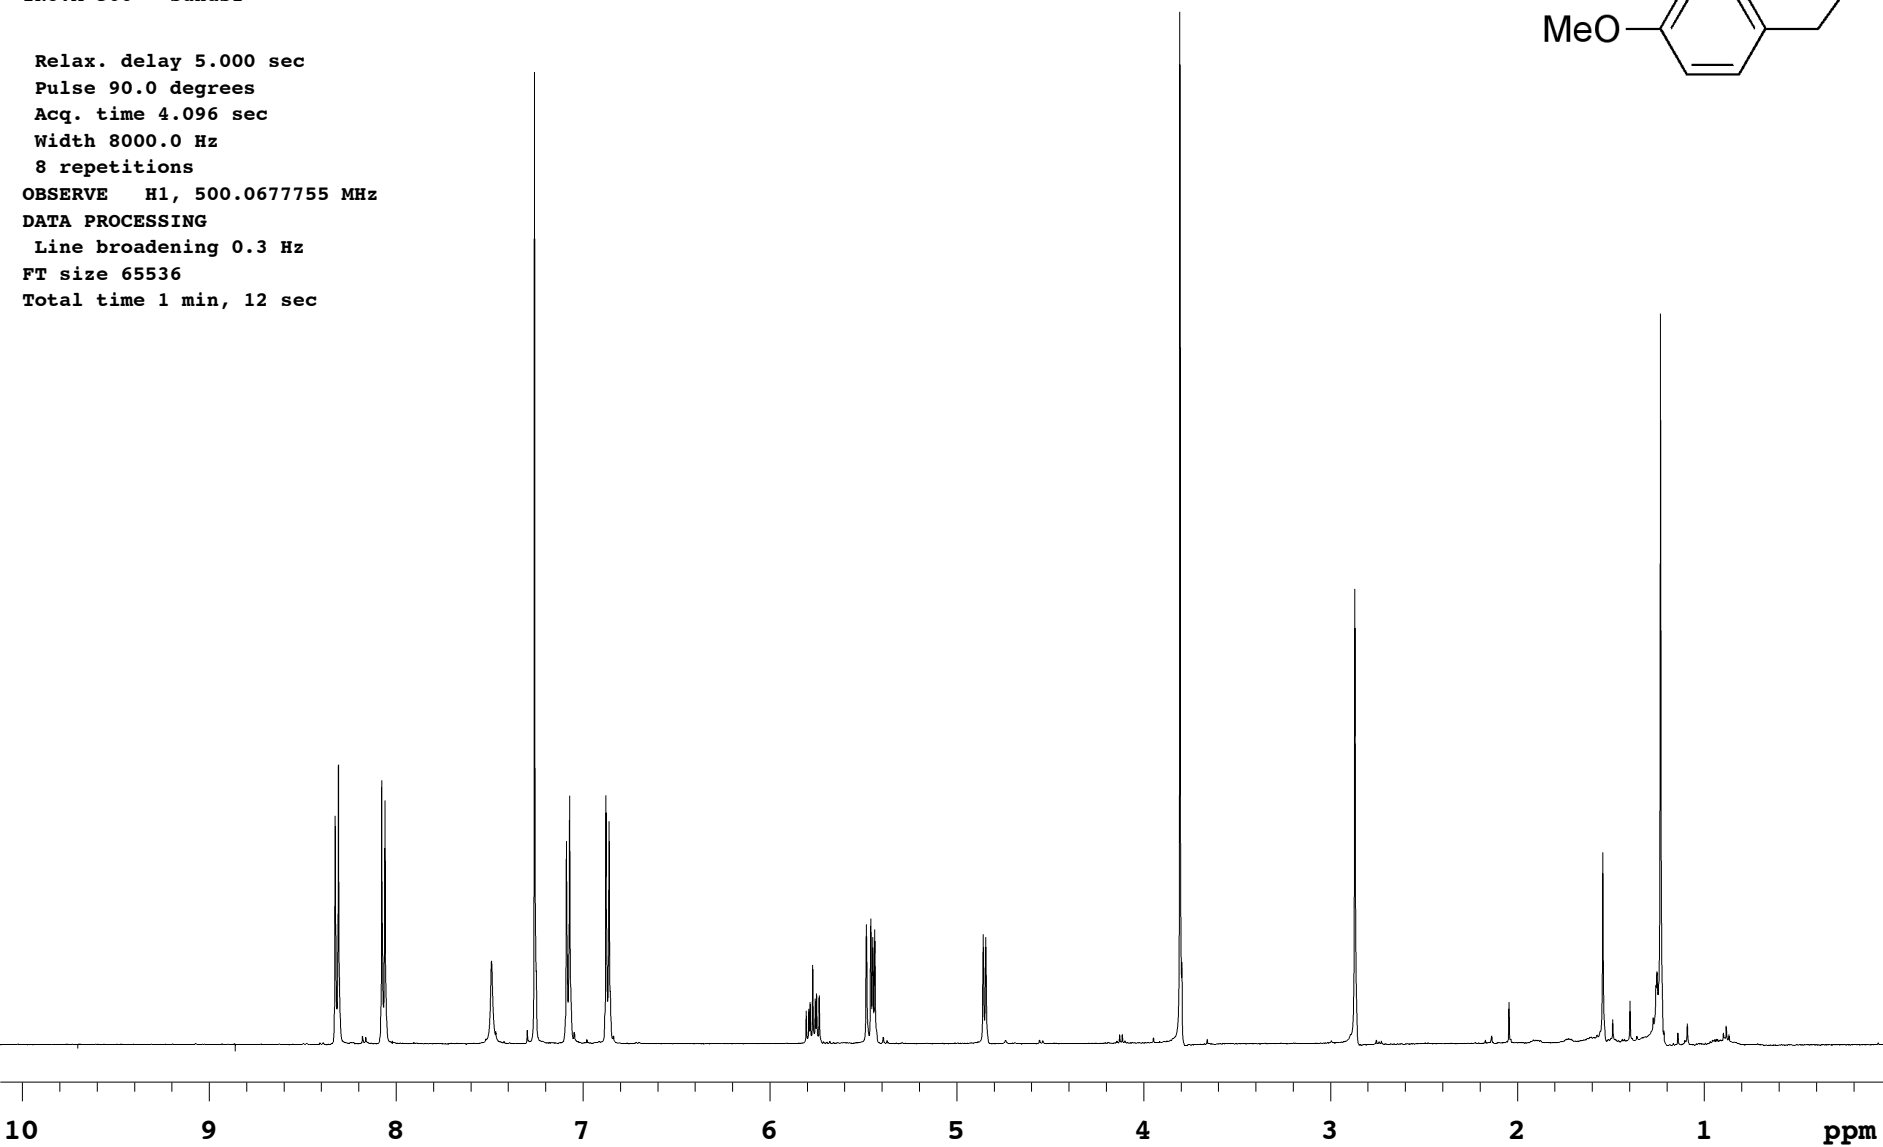

Pulse Sequence: s2pul

Solvent: CDCl<sub>3</sub>

Ambient temperature

User: 1-14-87

INOVA-500 "vxr500"

Relax. delay 1.000 sec

Pulse 45.0 degrees

Acq. time 1.024 sec

Width 32000.0 Hz

574 repetitions

OBSERVE C13, 125.5817492 MHz

DECOUPLE H1, 499.4315638 MHz

Power 47 dB

continuously on

WALTZ-16 modulated

DATA PROCESSING

Line broadening 1.0 Hz

FT size 65536

Total time 3 hr, 36 min, 52 sec

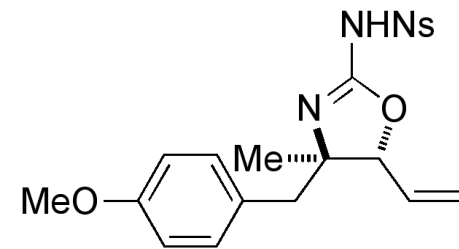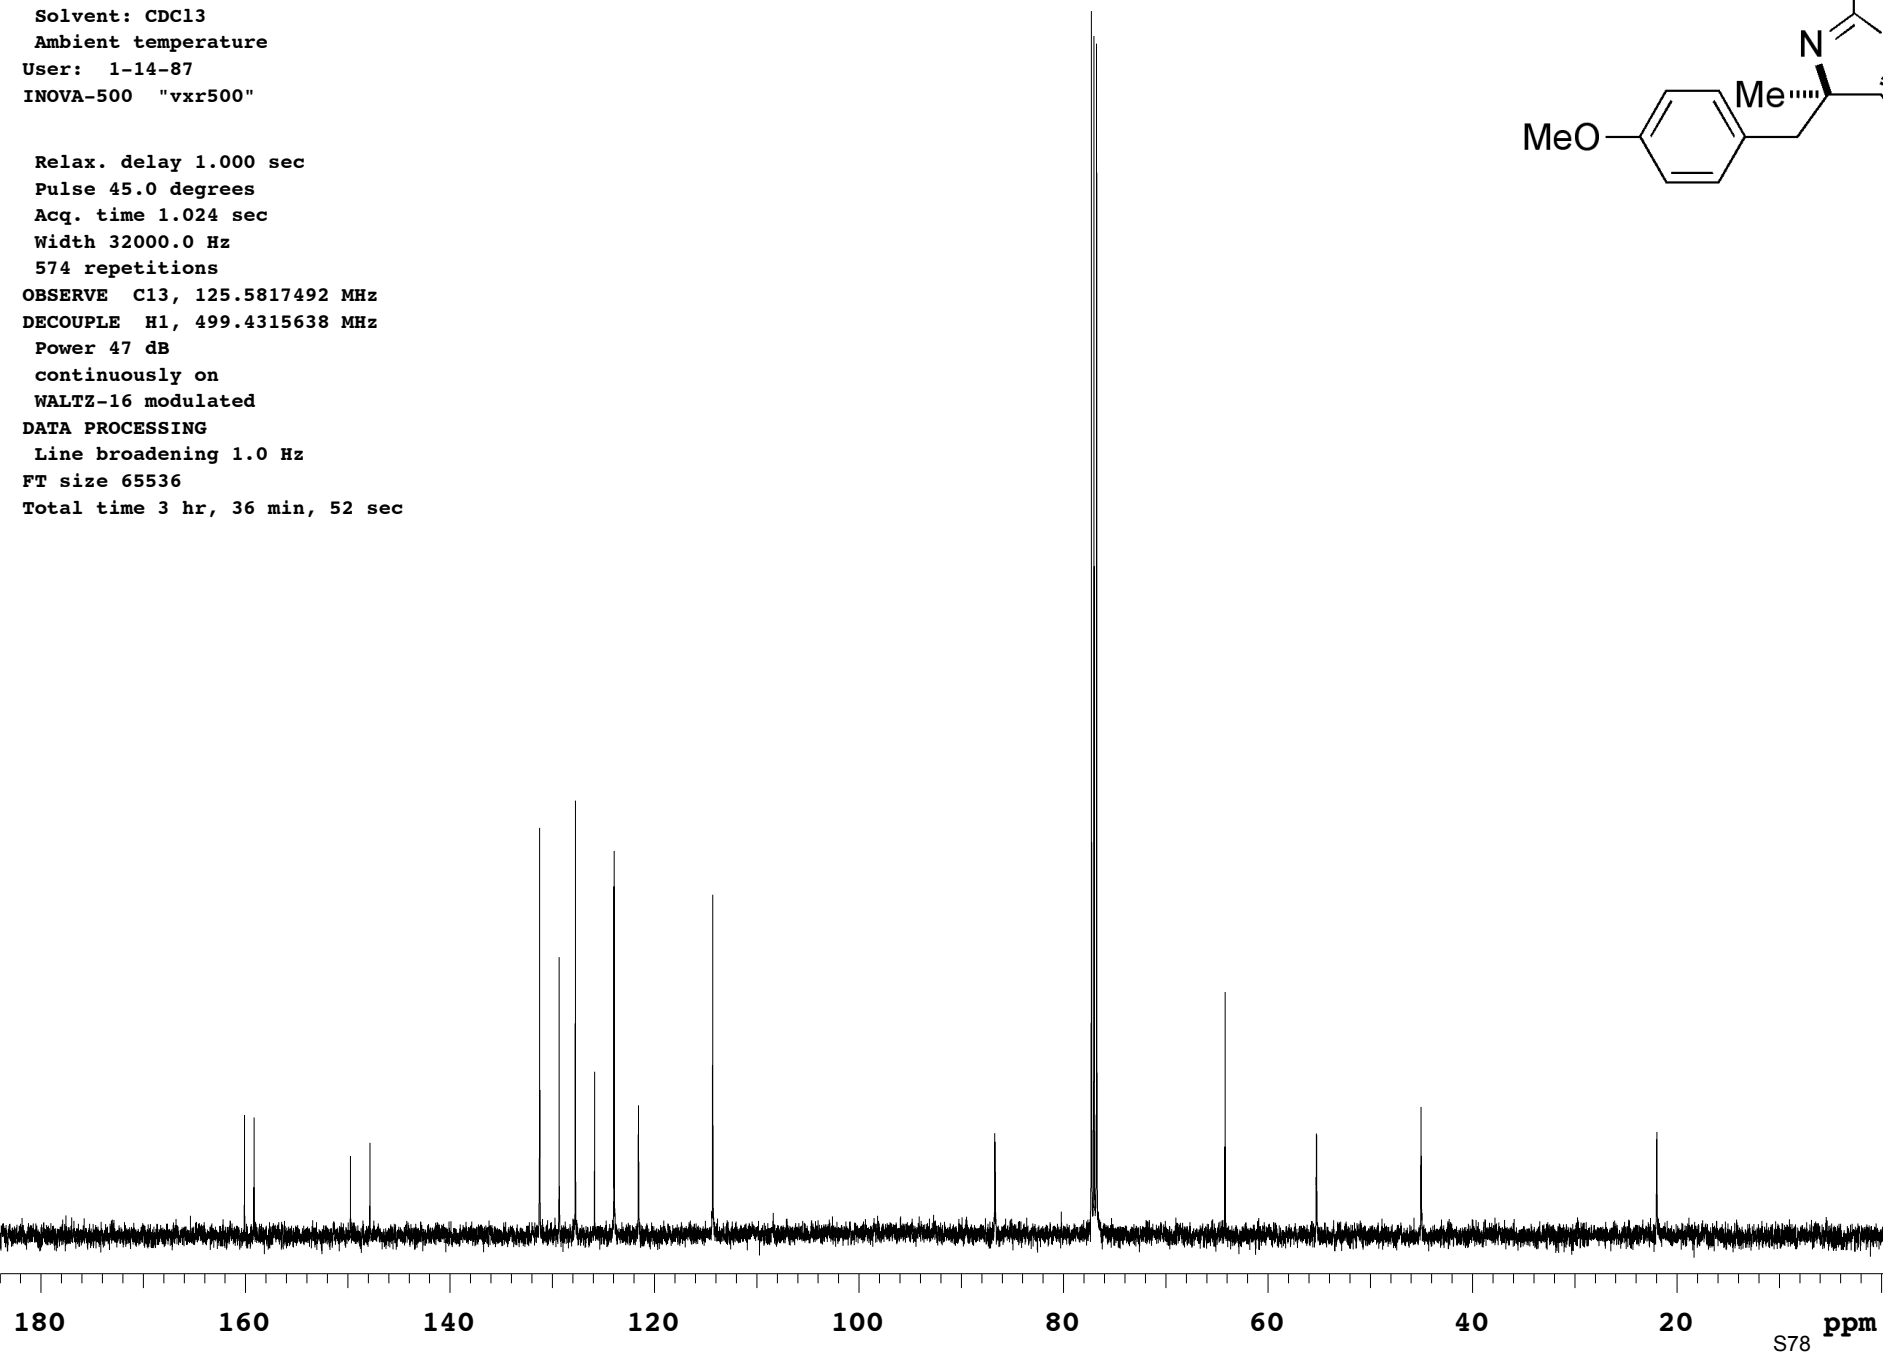

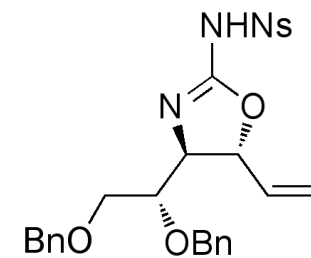

Pulse Sequence: s2pul

Solvent: CDCl3

Ambient temperature

File: DiBenzSynDiamine

INOVA-500 "u500"

Pulse 90.0 degrees

Acq. time 4.096 sec

Width 8000.0 Hz

32 repetitions

OBSERVE H1, 500.0677760 MHz

DATA PROCESSING

Line broadening 0.3 Hz

FT size 65536

Total time 2 min, 11 sec

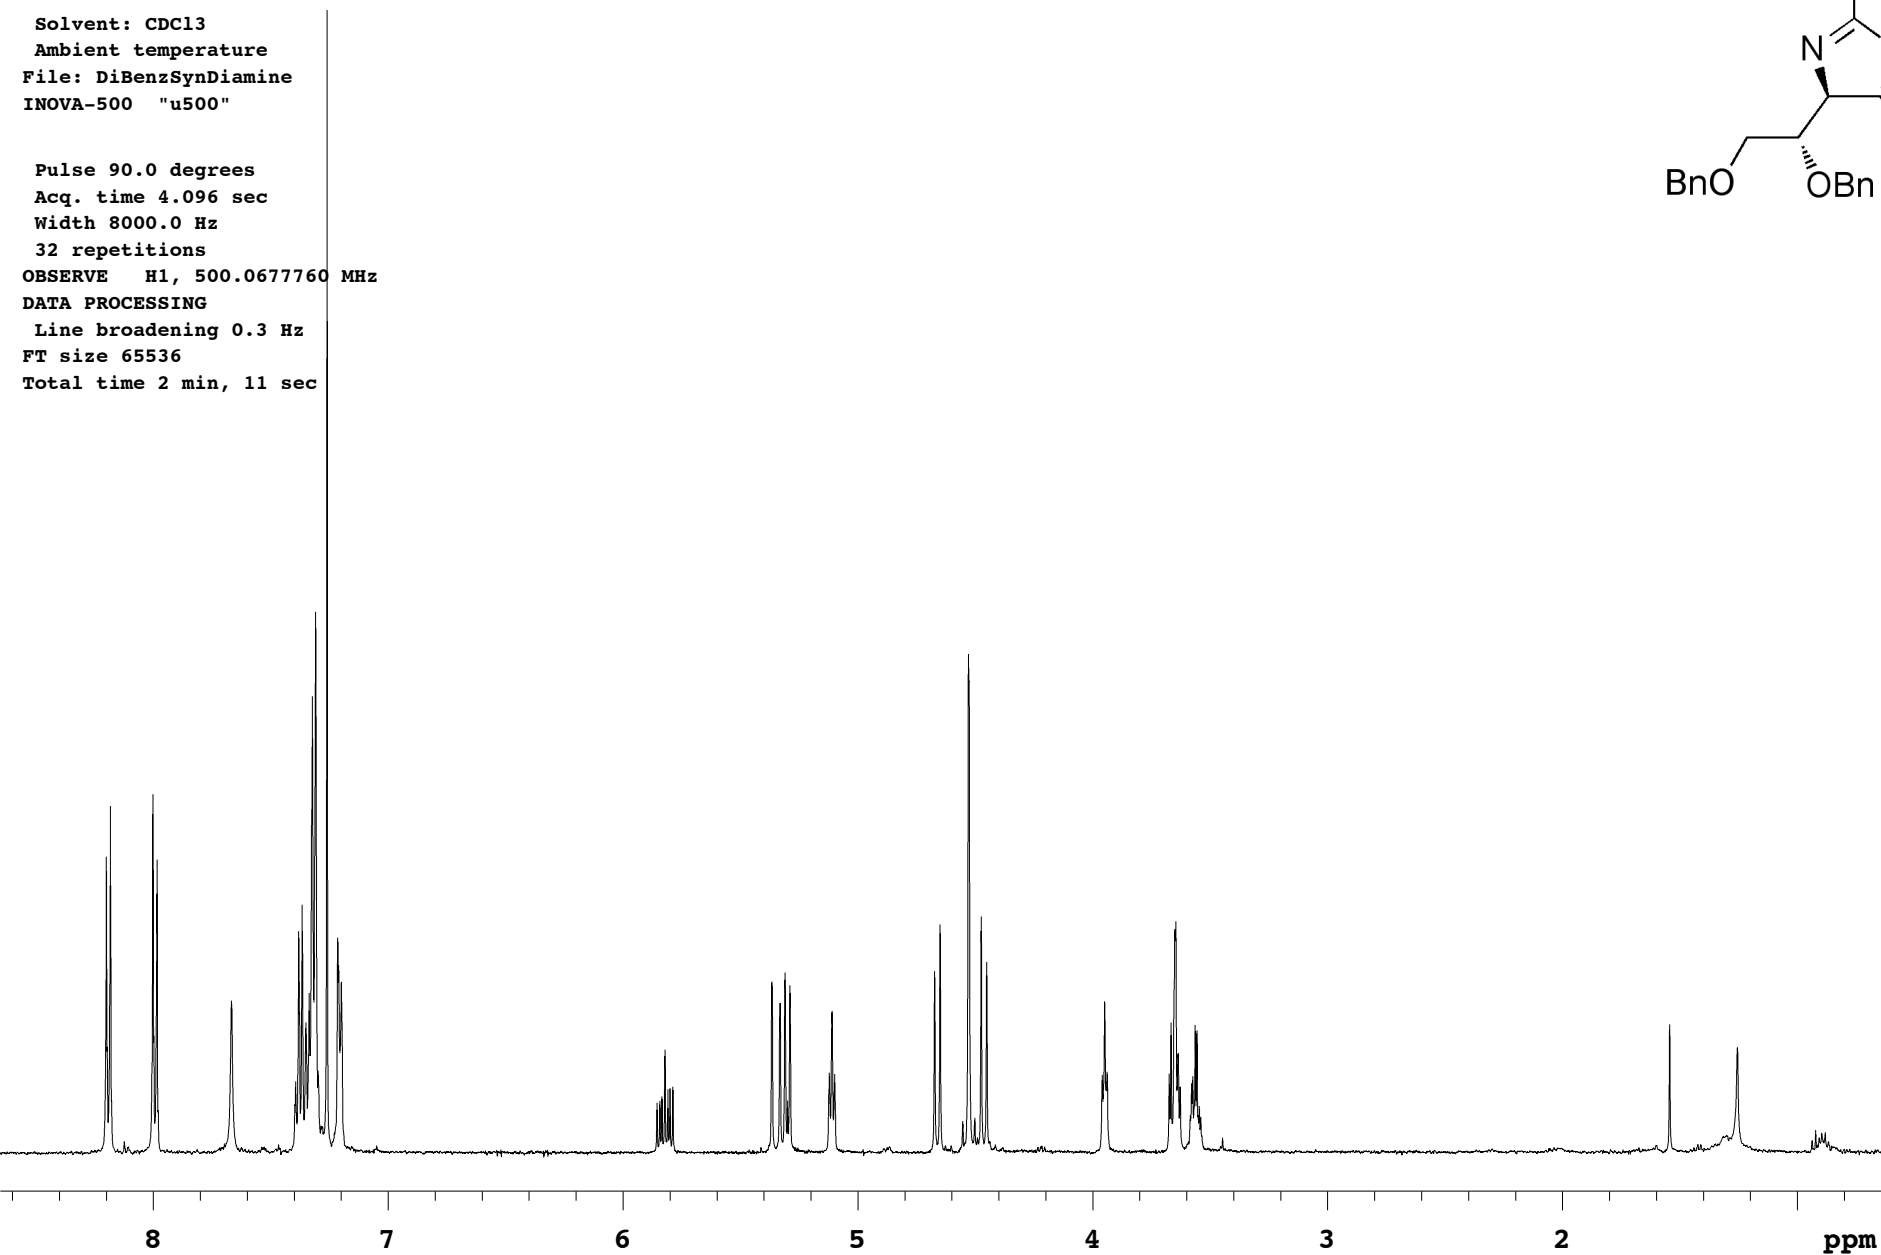

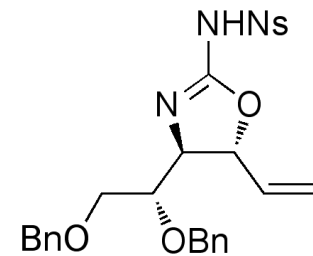

Pulse Sequence: s2pul

Solvent: CDCl<sub>3</sub>

Ambient temperature

User: 1-14-87

File: DiBenzSynDiamineCarb

INOVA-500 "sunds1"

Relax. delay 1.000 sec

Pulse 65.9 degrees

Acq. time 1.086 sec

Width 30165.9 Hz

206 repetitions

OBSERVE C13, 125.6472876 MHz

DECOUPLE H1, 499.6923275 MHz

Power 44 dB

continuously on

WALTZ-16 modulated

DATA PROCESSING

Line broadening 1.0 Hz

FT size 65536

Total time 5 hr, 49 min, 13 sec

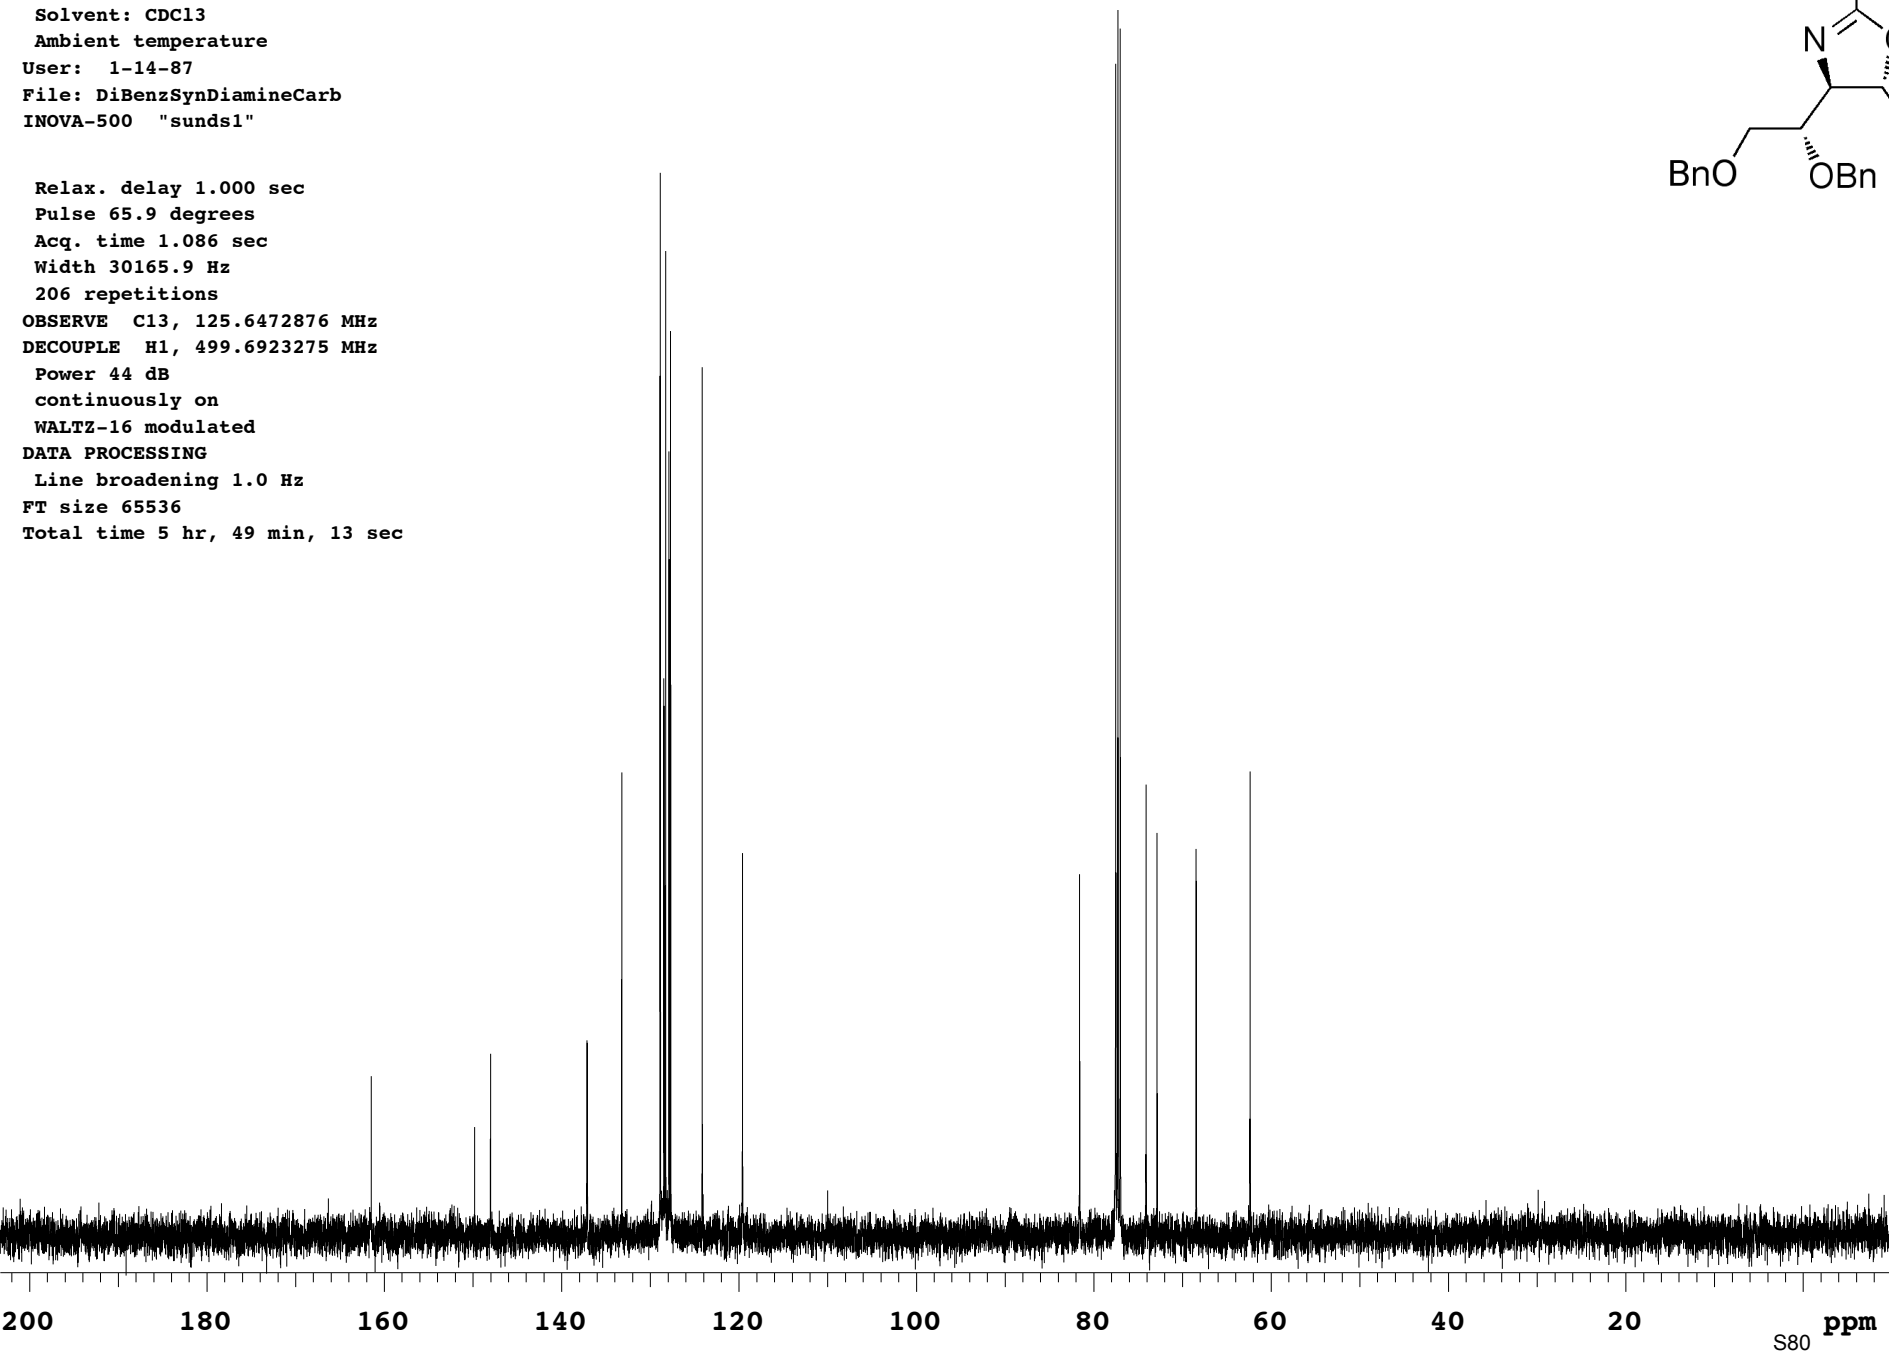

Pulse Sequence: s2pul

Solvent: CDCl<sub>3</sub>

Ambient temperature

File: FPhSynDiamine

INOVA-500 "sunds1"

Pulse 90.0 degrees

Acq. time 4.096 sec

Width 8000.0 Hz

108 repetitions

OBSERVE H1, 500.0677750 MHz

DATA PROCESSING

Line broadening 0.3 Hz

FT size 65536

Total time 1 hr, 8 min, 24 sec

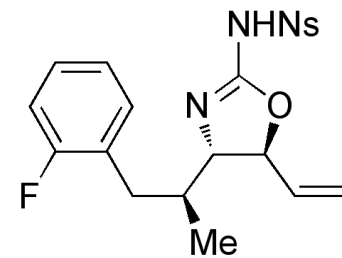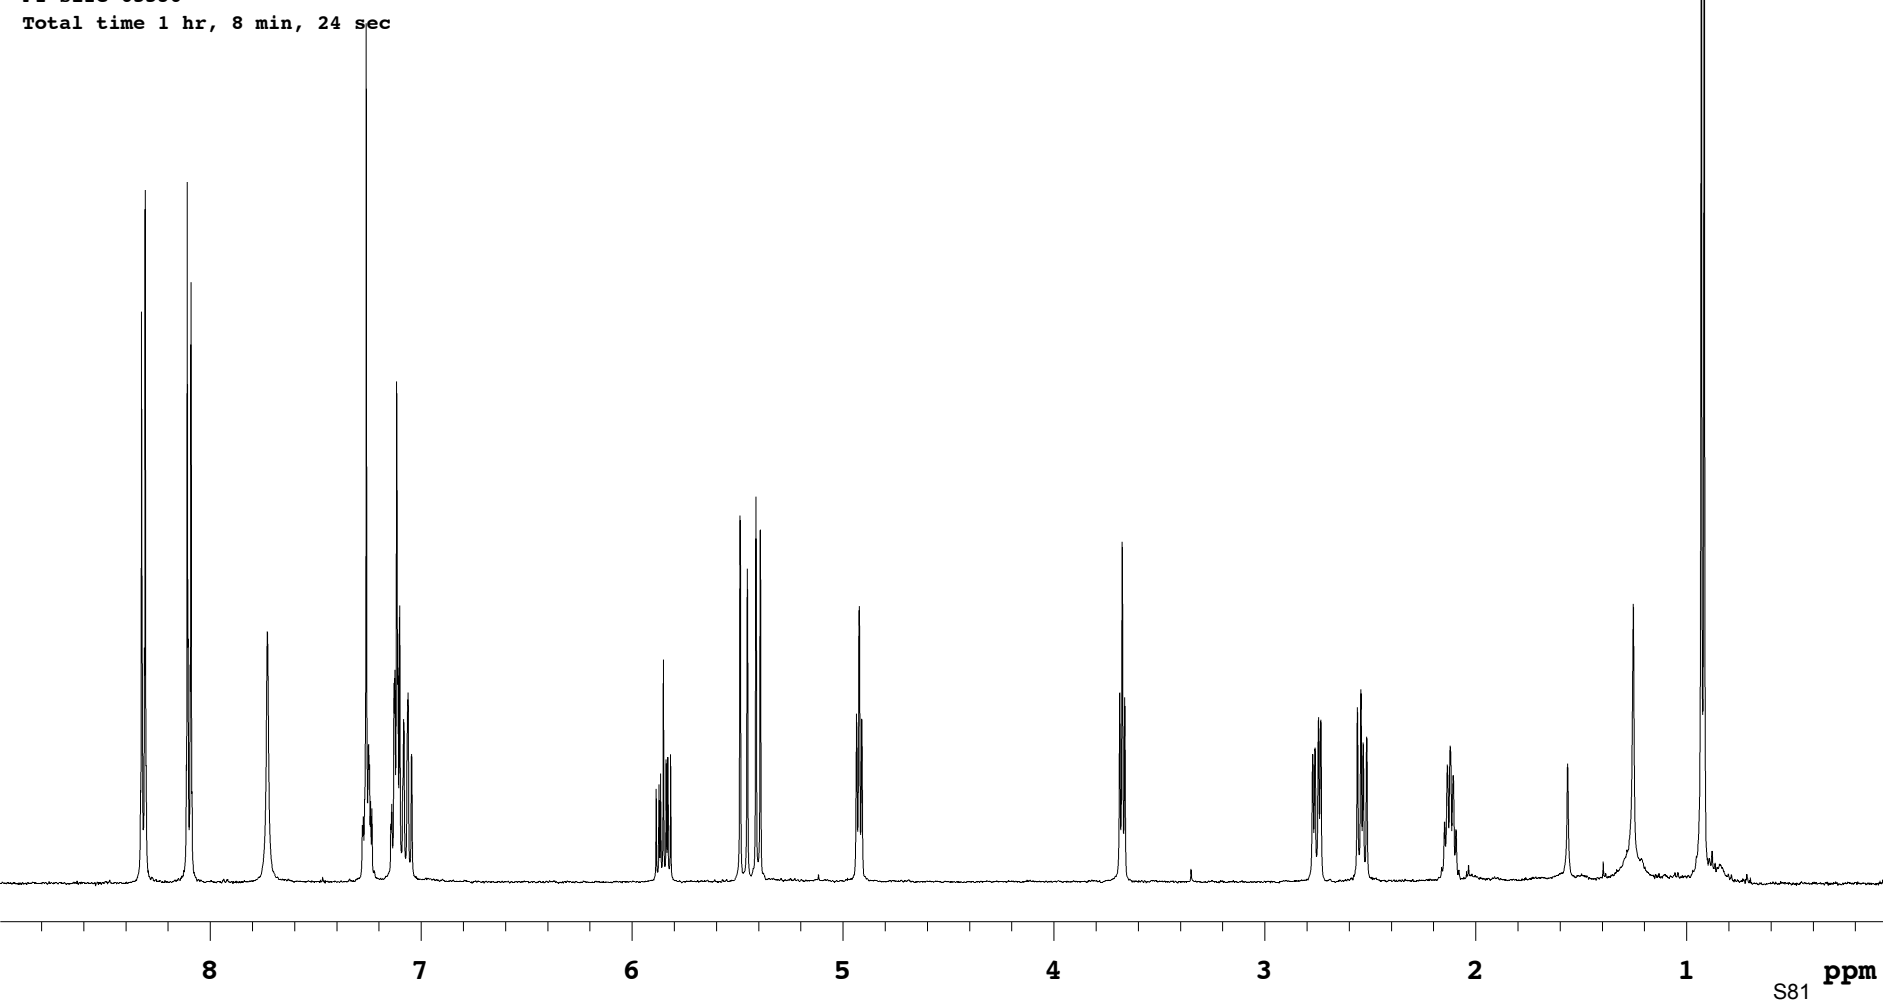



Pulse Sequence: s2pul

Solvent: CDCl<sub>3</sub>

Ambient temperature

User: 1-14-87

File: FPhSynDiamineCarbBest

INOVA-500 "sunds1"

Relax. delay 1.000 sec

Pulse 36.5 degrees

Acq. time 1.086 sec

Width 30165.9 Hz

784 repetitions

OBSERVE C13, 125.6472974 MHz

DECOUPLE H1, 499.6923275 MHz

Power 44 dB

continuously on

WALTZ-16 modulated

DATA PROCESSING

Line broadening 3.0 Hz

FT size 131072

Total time 58 hr, 11 min, 58 sec

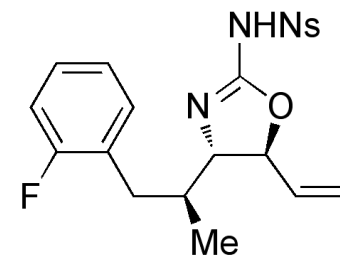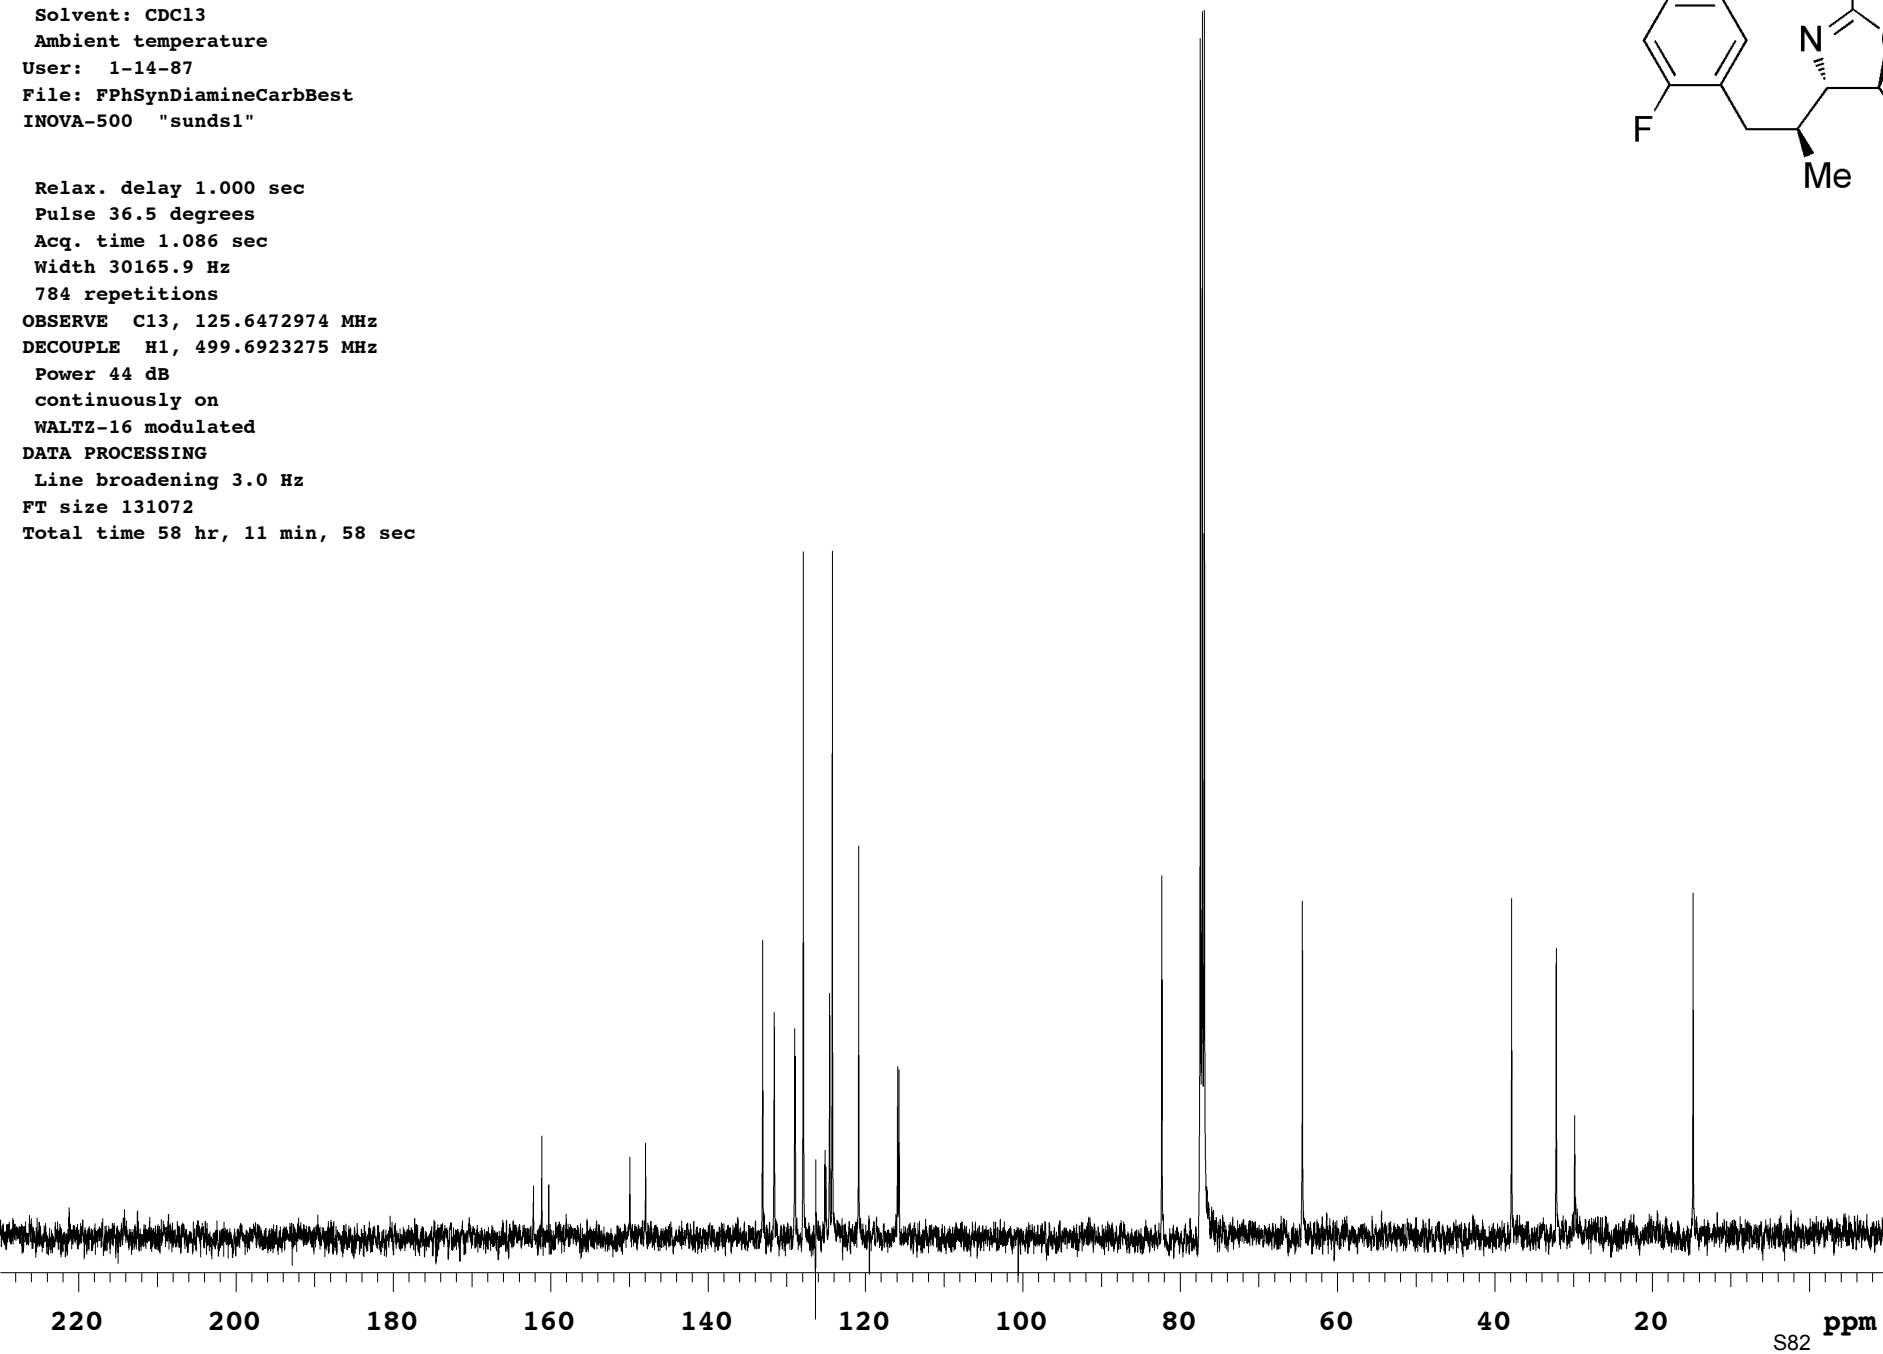

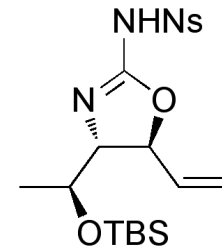

Pulse Sequence: s2pul

Solvent: CDCl<sub>3</sub>

Ambient temperature

File: OTBSAntiSynDiamine

INOVA-500 "sunds1"

Relax. delay 10.000 sec

Pulse 61.6 degrees

Acq. time 4.665 sec

Width 7024.9 Hz

8 repetitions

OBSERVE H1, 499.6906570 MHz

DATA PROCESSING

Line broadening 0.3 Hz

FT size 65536

Total time 3 min, 54 sec

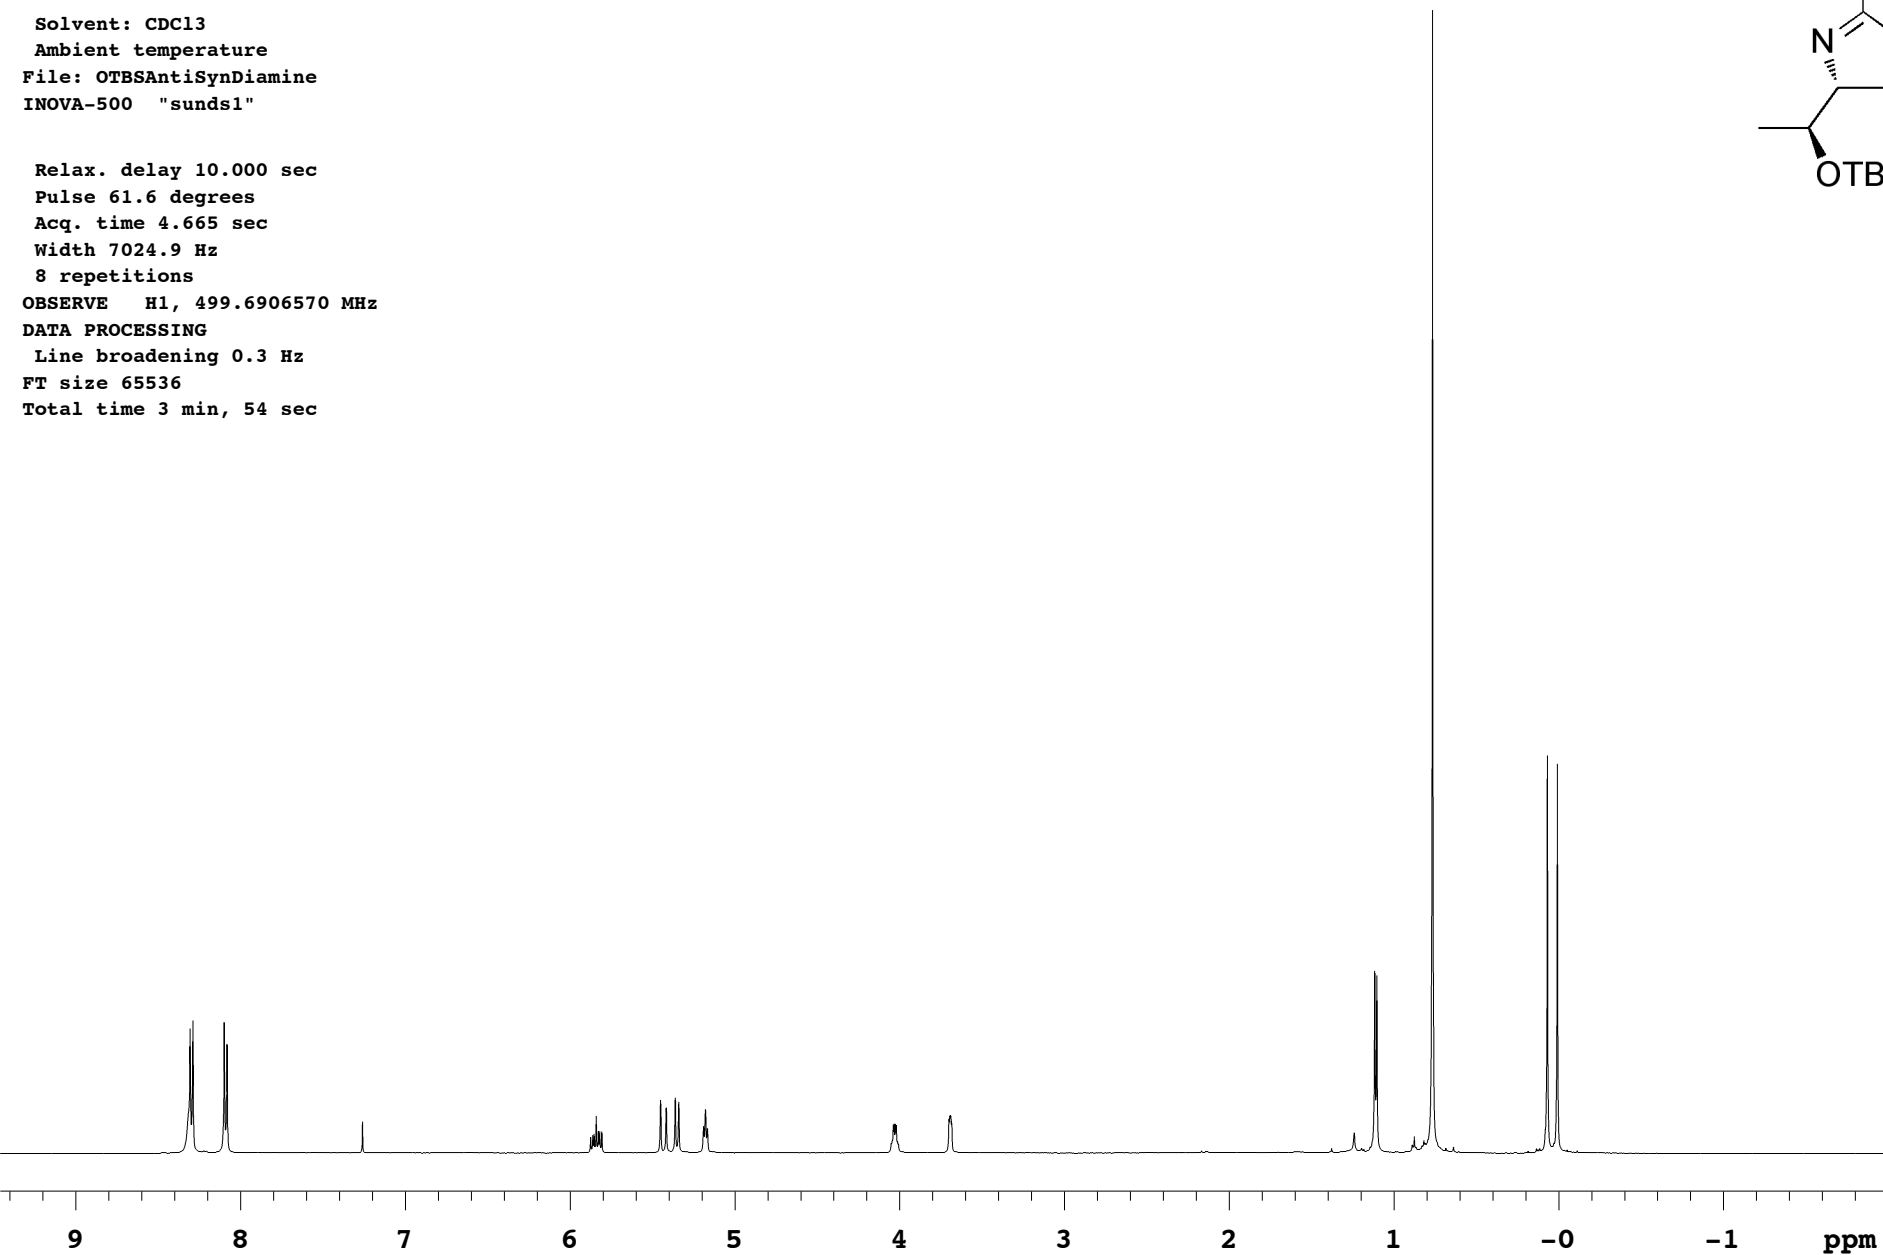

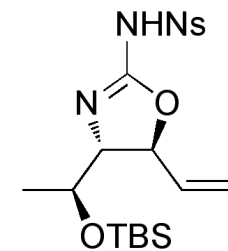

Pulse Sequence: s2pul

Solvent: CDCl3

Ambient temperature

User: 1-14-87

File: OTBSAntiSynDiaminCarb

INOVA-500 "sunds1"

Relax. delay 1.000 sec

Pulse 65.9 degrees

Acq. time 1.086 sec

Width 30165.9 Hz

84 repetitions

OBSERVE C13, 125.6473011 MHz

DECOUPLE H1, 499.6923275 MHz

Power 44 dB

continuously on

WALTZ-16 modulated

DATA PROCESSING

Line broadening 1.0 Hz

FT size 65536

Total time 34 min, 57 sec

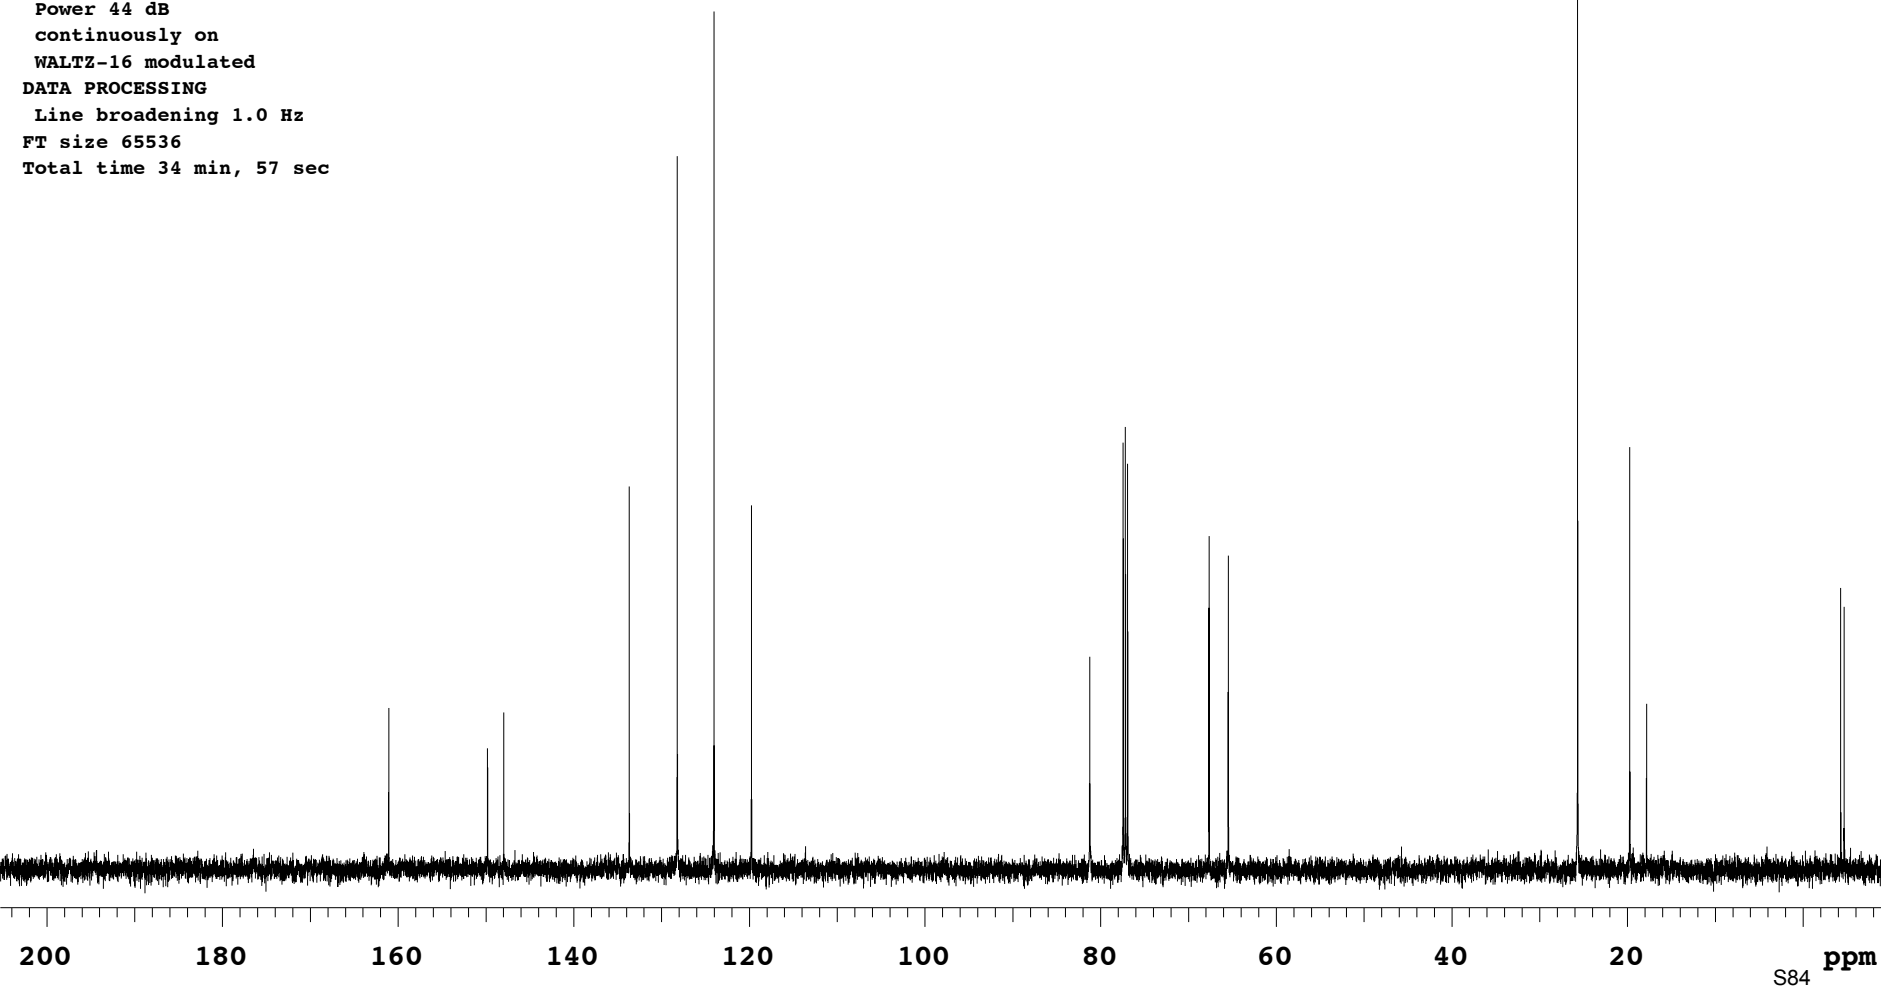

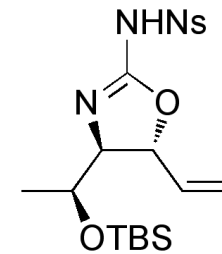

Pulse Sequence: s2pul

Solvent: CDCl3

Ambient temperature

File: OTBSynSynDiamine

INOVA-500 "sunds1"

Relax. delay 10.000 sec

Pulse 45.0 degrees

Acq. time 4.096 sec

Width 8000.0 Hz

62 repetitions

OBSERVE H1, 499.4299009 MHz

DATA PROCESSING

Line broadening 0.3 Hz

FT size 65536

Total time 3 hr, 55 min, 4 sec

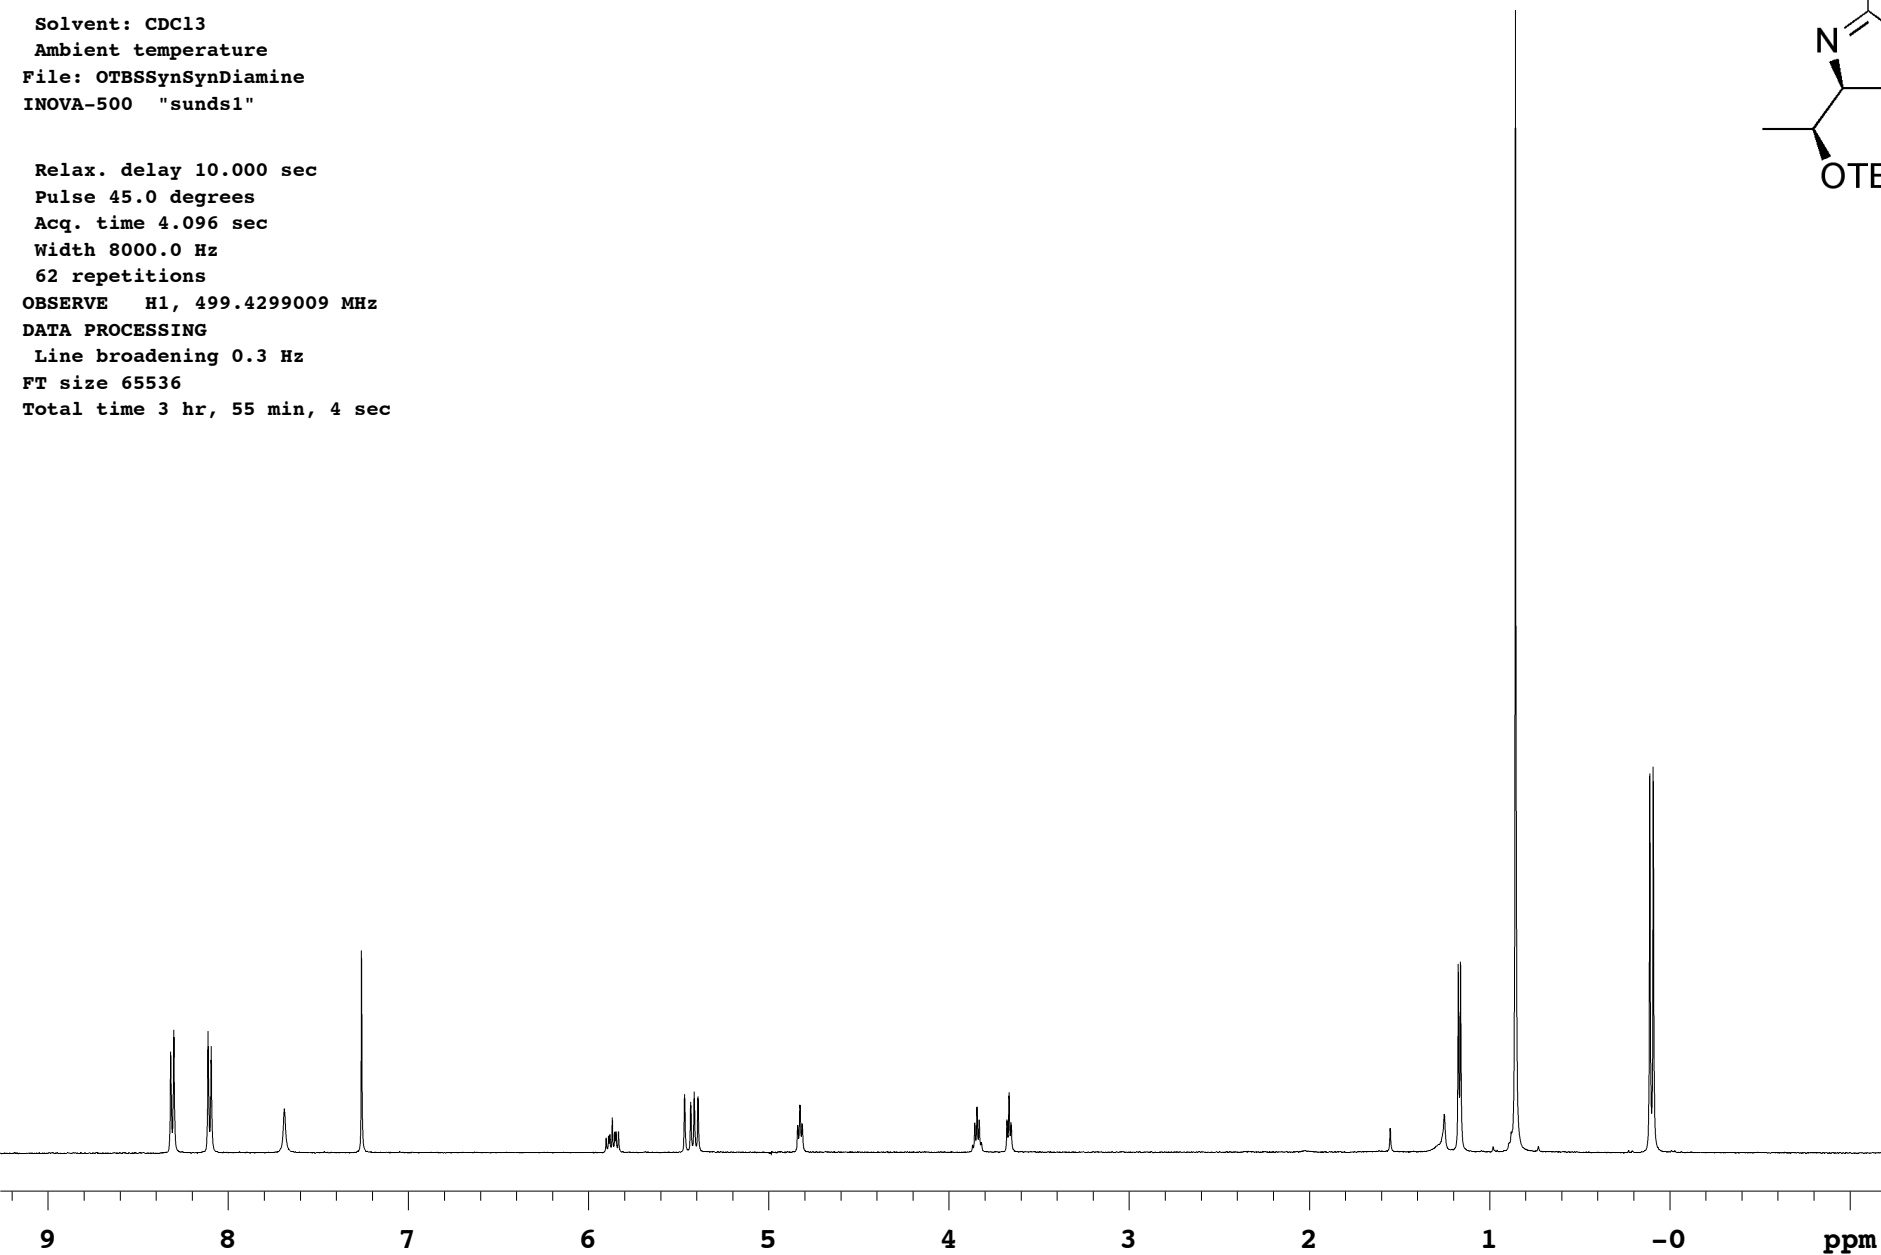

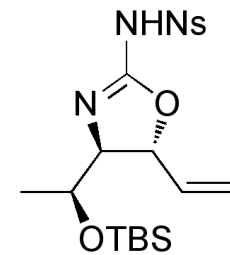

Pulse Sequence: s2pul

Solvent: CDCl3

Ambient temperature

User: 1-14-87

File: OTBSynSynDiamineCarb

INOVA-500 "sunds1"

Relax. delay 1.000 sec

Pulse 65.9 degrees

Acq. time 1.086 sec

Width 30165.9 Hz

100 repetitions

OBSERVE C13, 125.6472965 MHz

DECOUPLE H1, 499.6923275 MHz

Power 44 dB

continuously on

WALTZ-16 modulated

DATA PROCESSING

Line broadening 1.0 Hz

FT size 65536

Total time 34 min, 57 sec

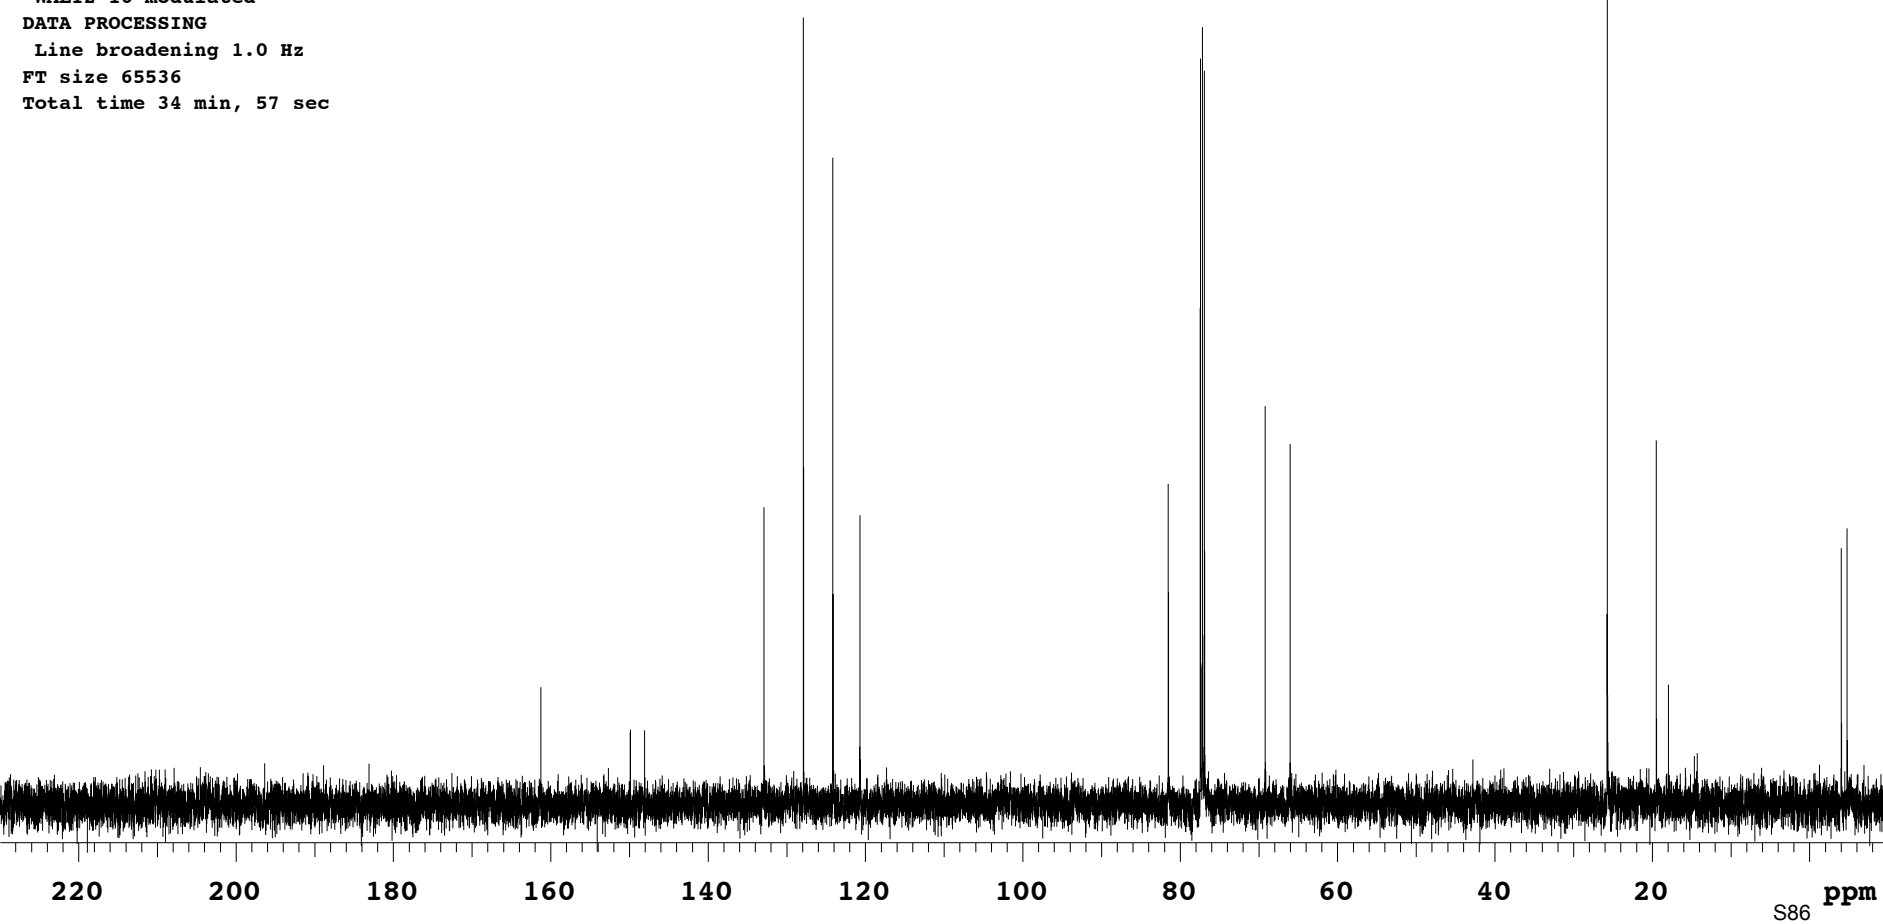

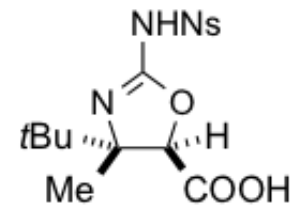

Pulse Sequence: s2pul

Solvent: CD3CN

Ambient temperature

File: oxazoline.acid.H

INOVA-500 "sunds1"

Relax. delay 5.000 sec

Pulse 90.0 degrees

Acq. time 4.096 sec

Width 8000.0 Hz

6 repetitions

OBSERVE H1, 500.0704378 MHz

DATA PROCESSING

Line broadening 0.3 Hz

FT size 65536

Total time 1 min, 12 sec

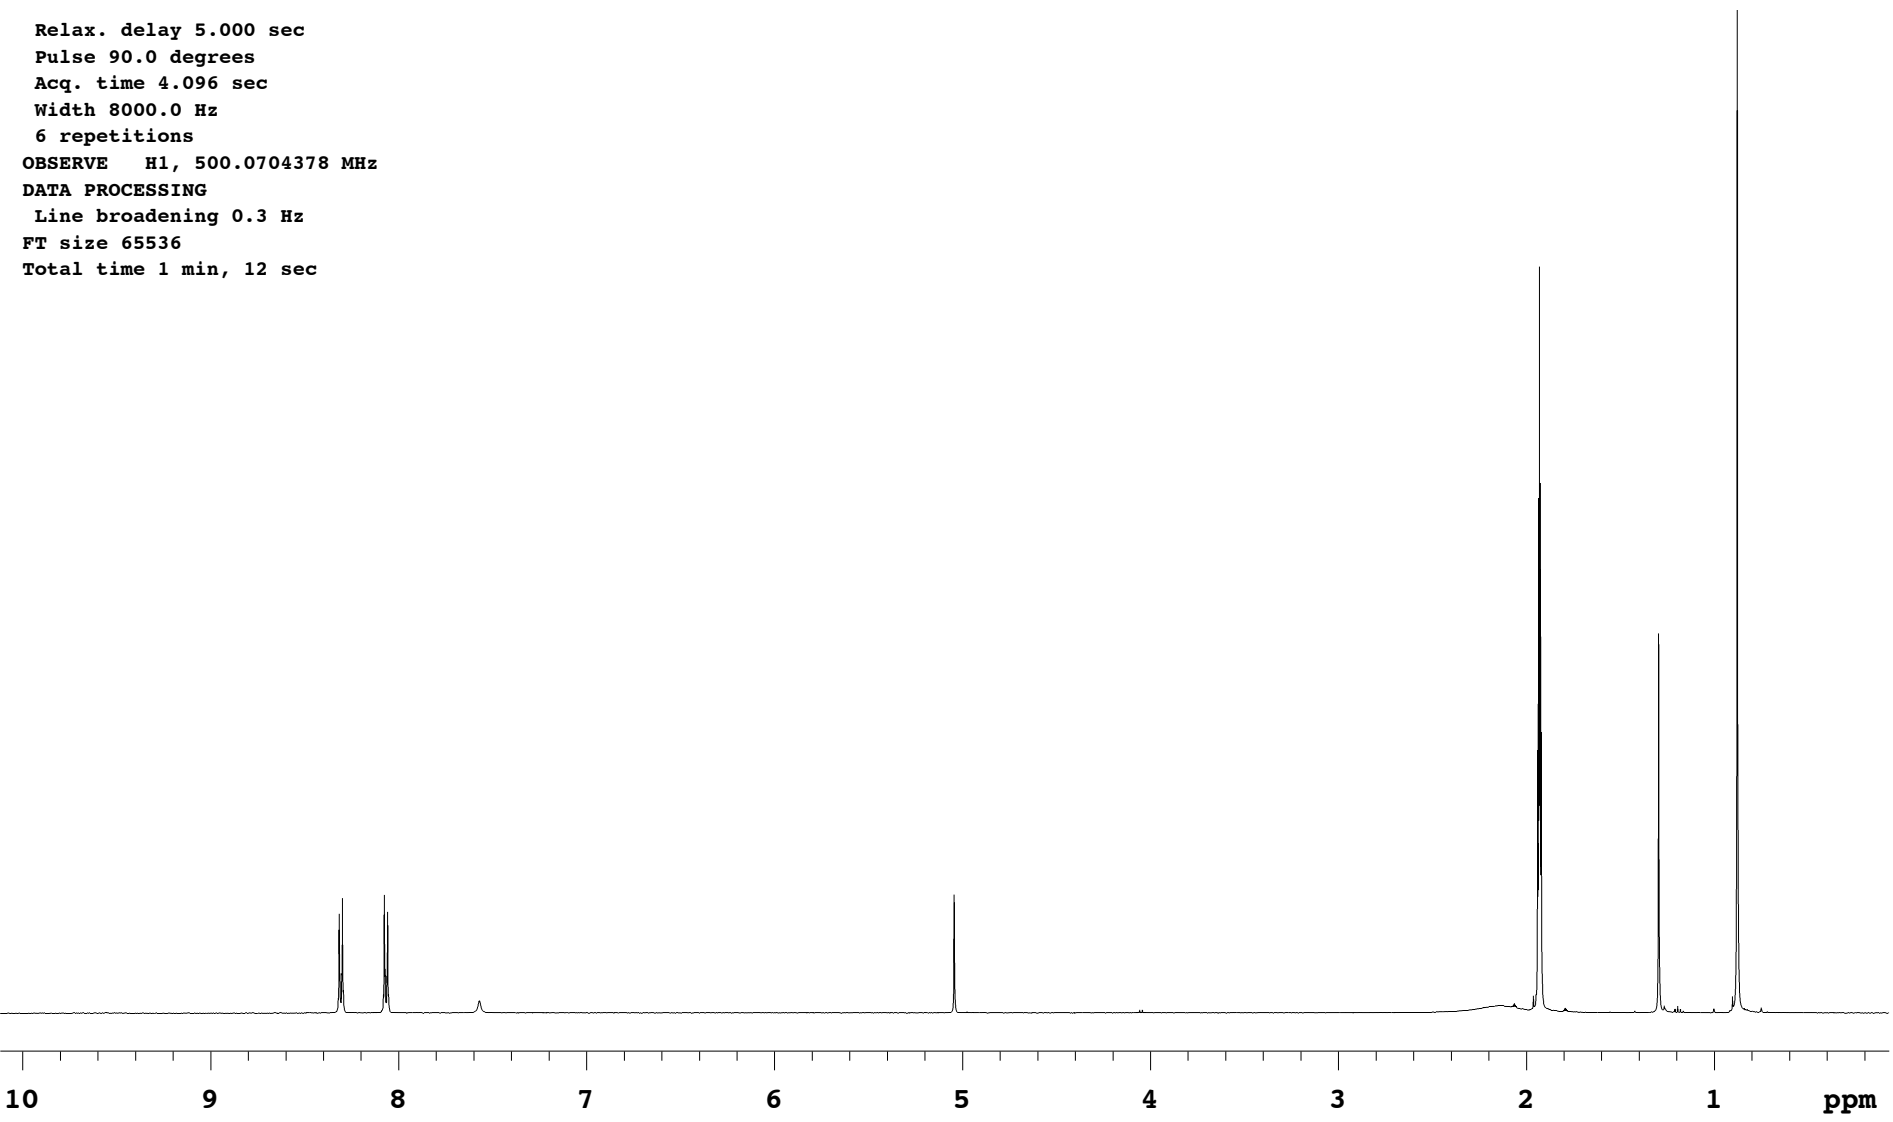

Pulse Sequence: s2pul

Solvent: CD3OD

Ambient temperature

User: 1-14-87

INOVA-500 "u500"

Relax. delay 10.000 sec

Pulse 28.1 degrees

Acq. time 1.086 sec

Width 30165.9 Hz

150 repetitions

OBSERVE C13, 125.6476336 MHz

DECOUPLE H1, 499.6942963 MHz

Power 45 dB

continuously on

WALTZ-16 modulated

DATA PROCESSING

Line broadening 1.0 Hz

FT size 65536

Total time 4 hr, 56 min, 3 sec

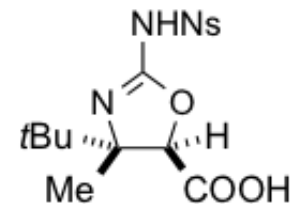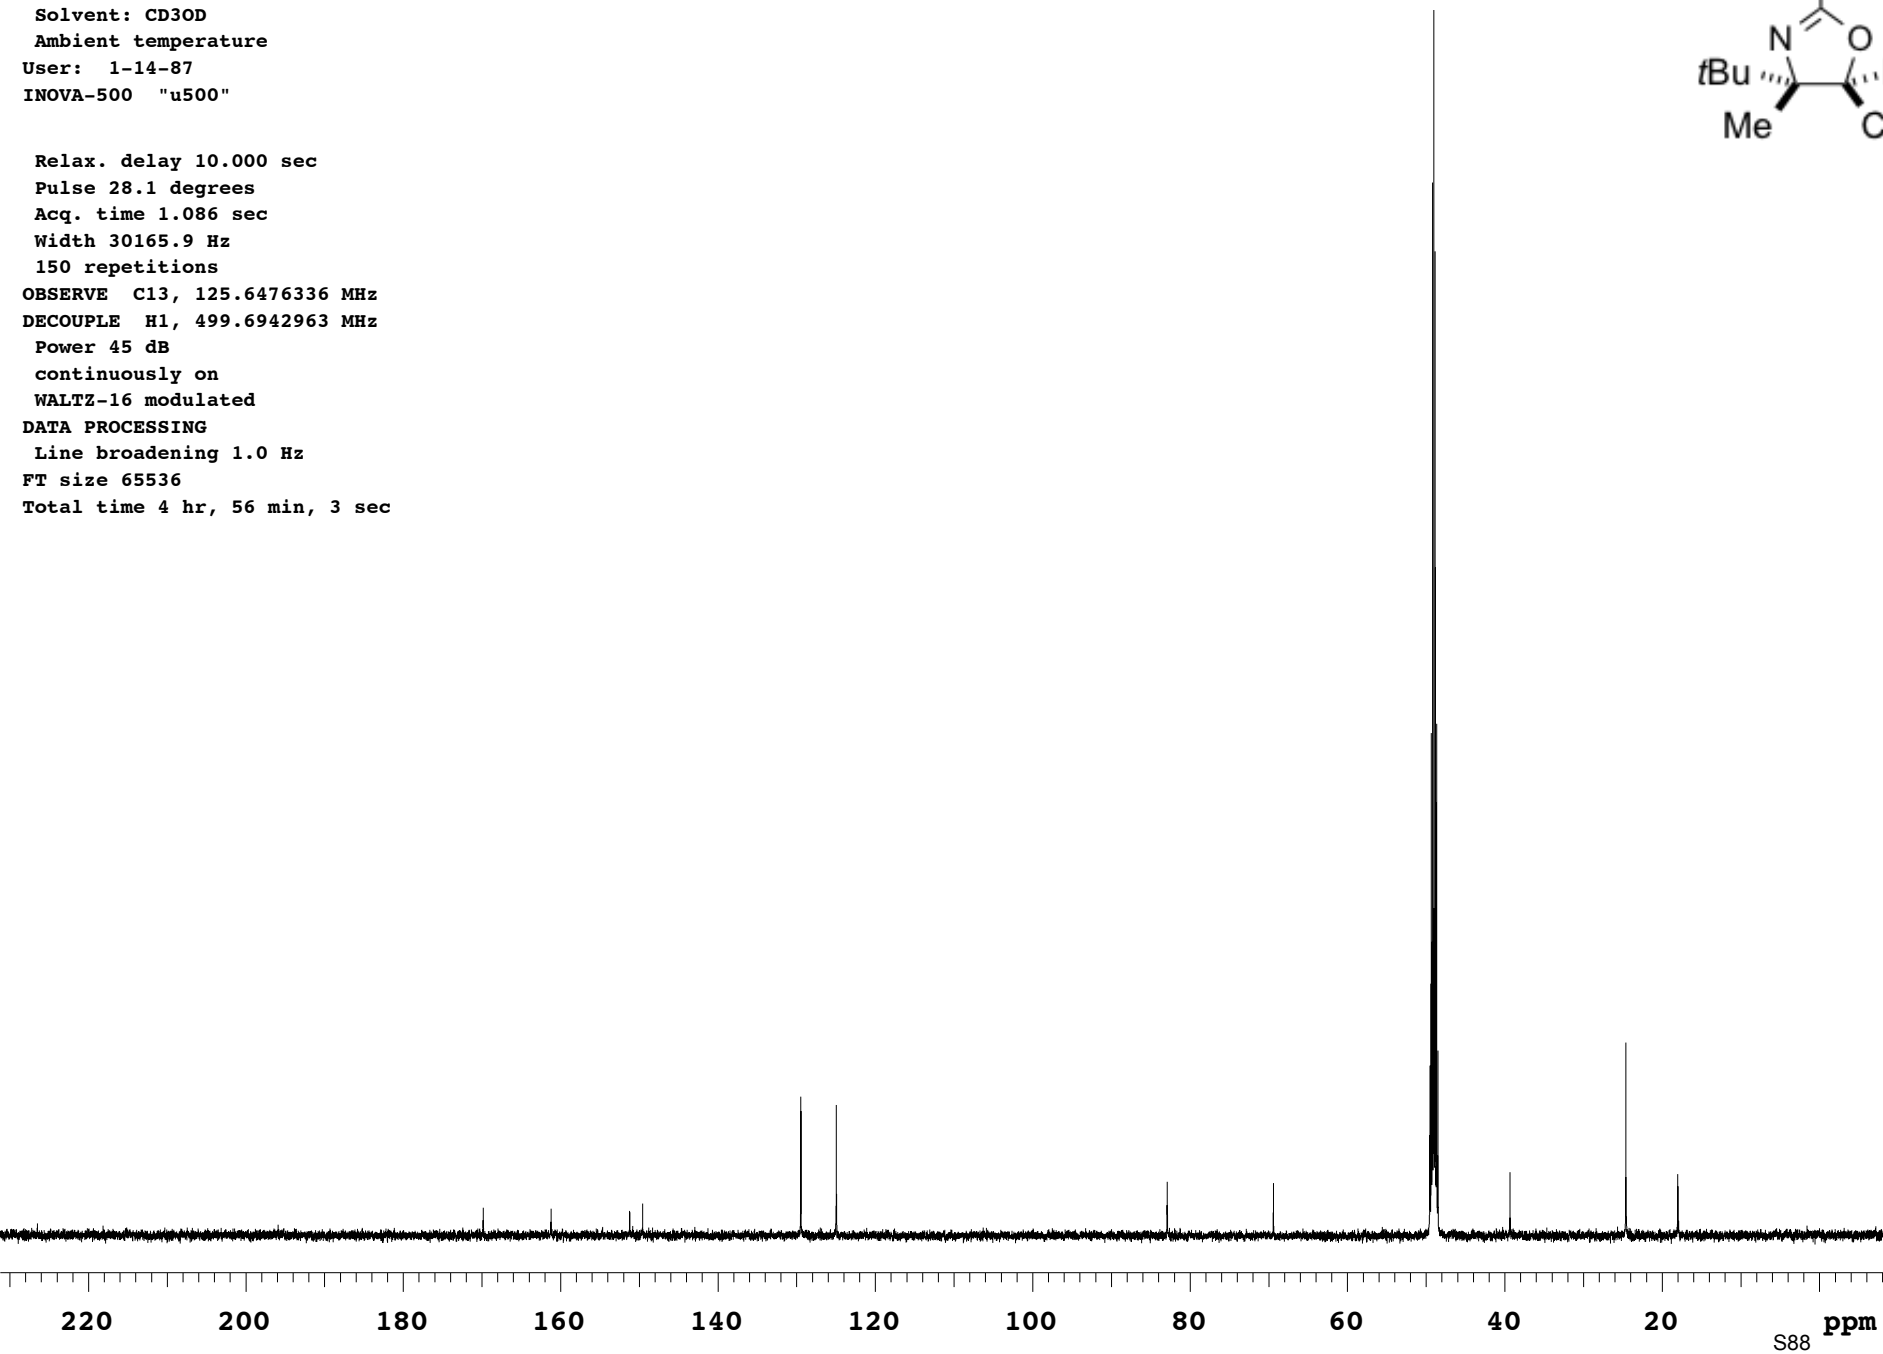

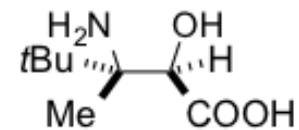

Pulse Sequence: s2pul

Solvent: D2O

Ambient temperature

File: IIS.aminoalcoholacid.H

INOVA-500 "sunds1"

Relax. delay 5.000 sec

Pulse 90.0 degrees

Acq. time 4.096 sec

Width 8000.0 Hz

8 repetitions

OBSERVE H1, 500.0689885 MHz

DATA PROCESSING

Line broadening 0.3 Hz

FT size 65536

Total time 1 min, 12 sec

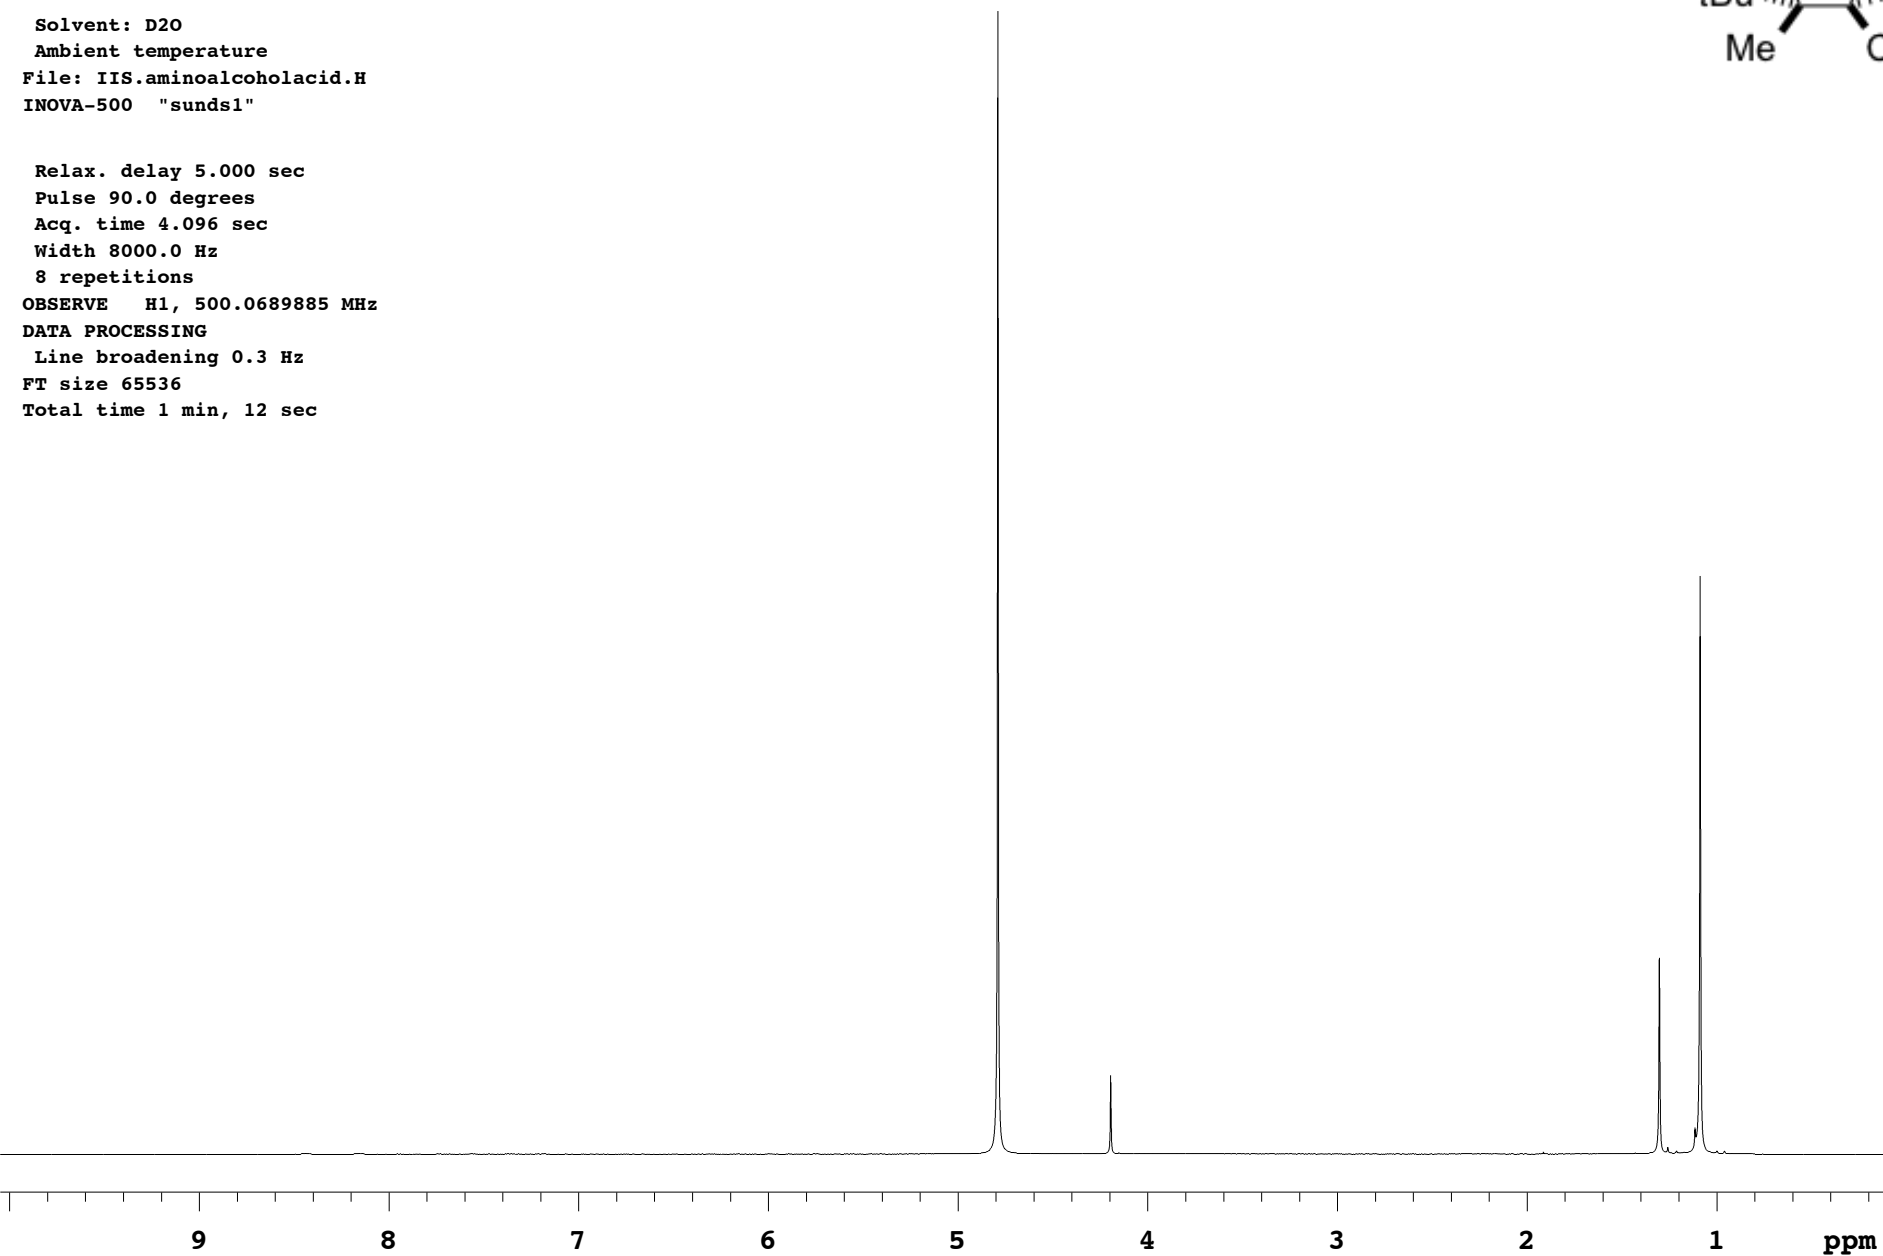



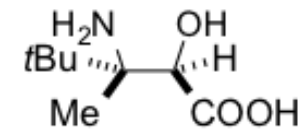

Pulse Sequence: s2pul

Solvent: D<sub>2</sub>O

Ambient temperature

User: 1-14-87

File: iis.128.x.col.c13

INOVA-500 "sunds1"

Relax. delay 1.000 sec

Pulse 45.0 degrees

Acq. time 1.024 sec

Width 32000.0 Hz

12800 repetitions

OBSERVE C13, 125.5820394 MHz

DECOUPLE H1, 499.4328473 MHz

Power 47 dB

continuously on

WALTZ-16 modulated

DATA PROCESSING

Line broadening 1.0 Hz

FT size 65536

Total time 7 hr, 13 min, 43 sec

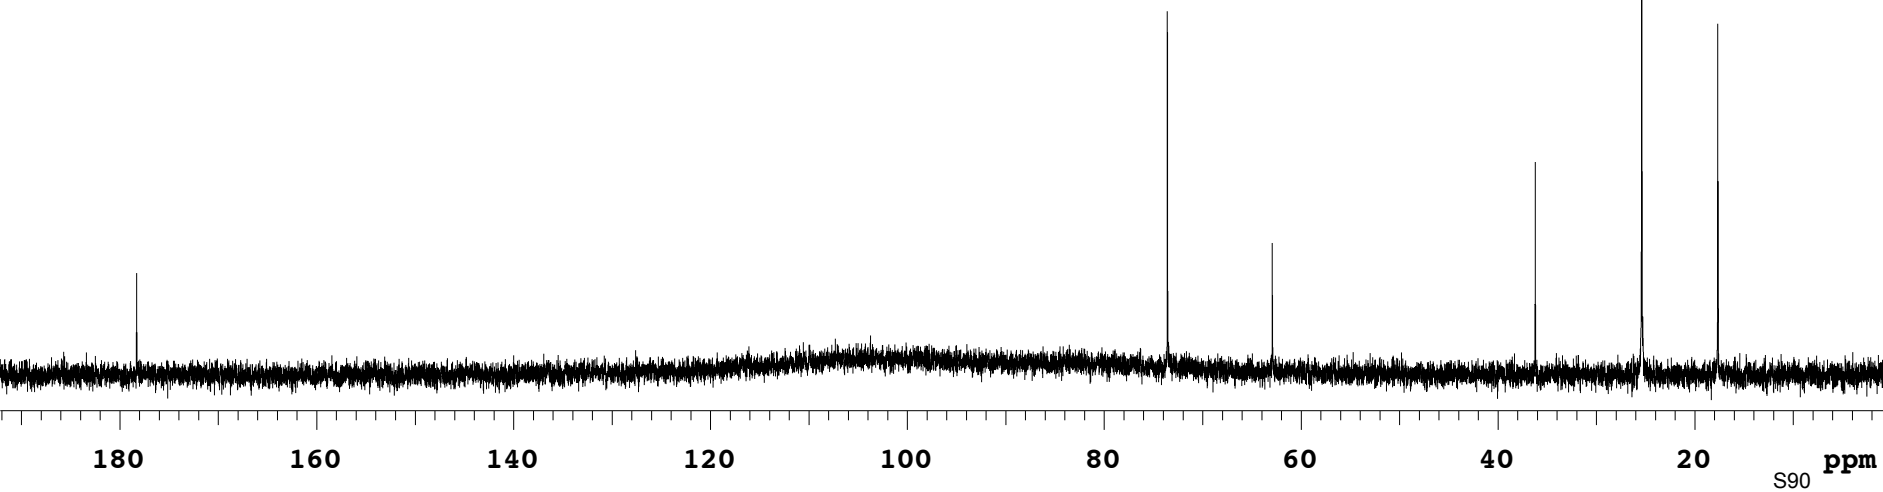

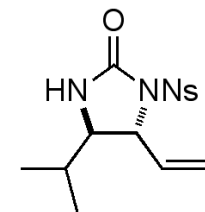

Pulse Sequence: s2pul

Solvent: CDCl<sub>3</sub>

Ambient temperature

File: iPr\_P

INOVA-500 "sunds1"

Relax. delay 5.000 sec

Pulse 90.0 degrees

Acq. time 4.096 sec

Width 8000.0 Hz

12 repetitions

OBSERVE H1, 500.0677750 MHz

DATA PROCESSING

Line broadening 0.3 Hz

FT size 65536

Total time 4 min, 51 sec

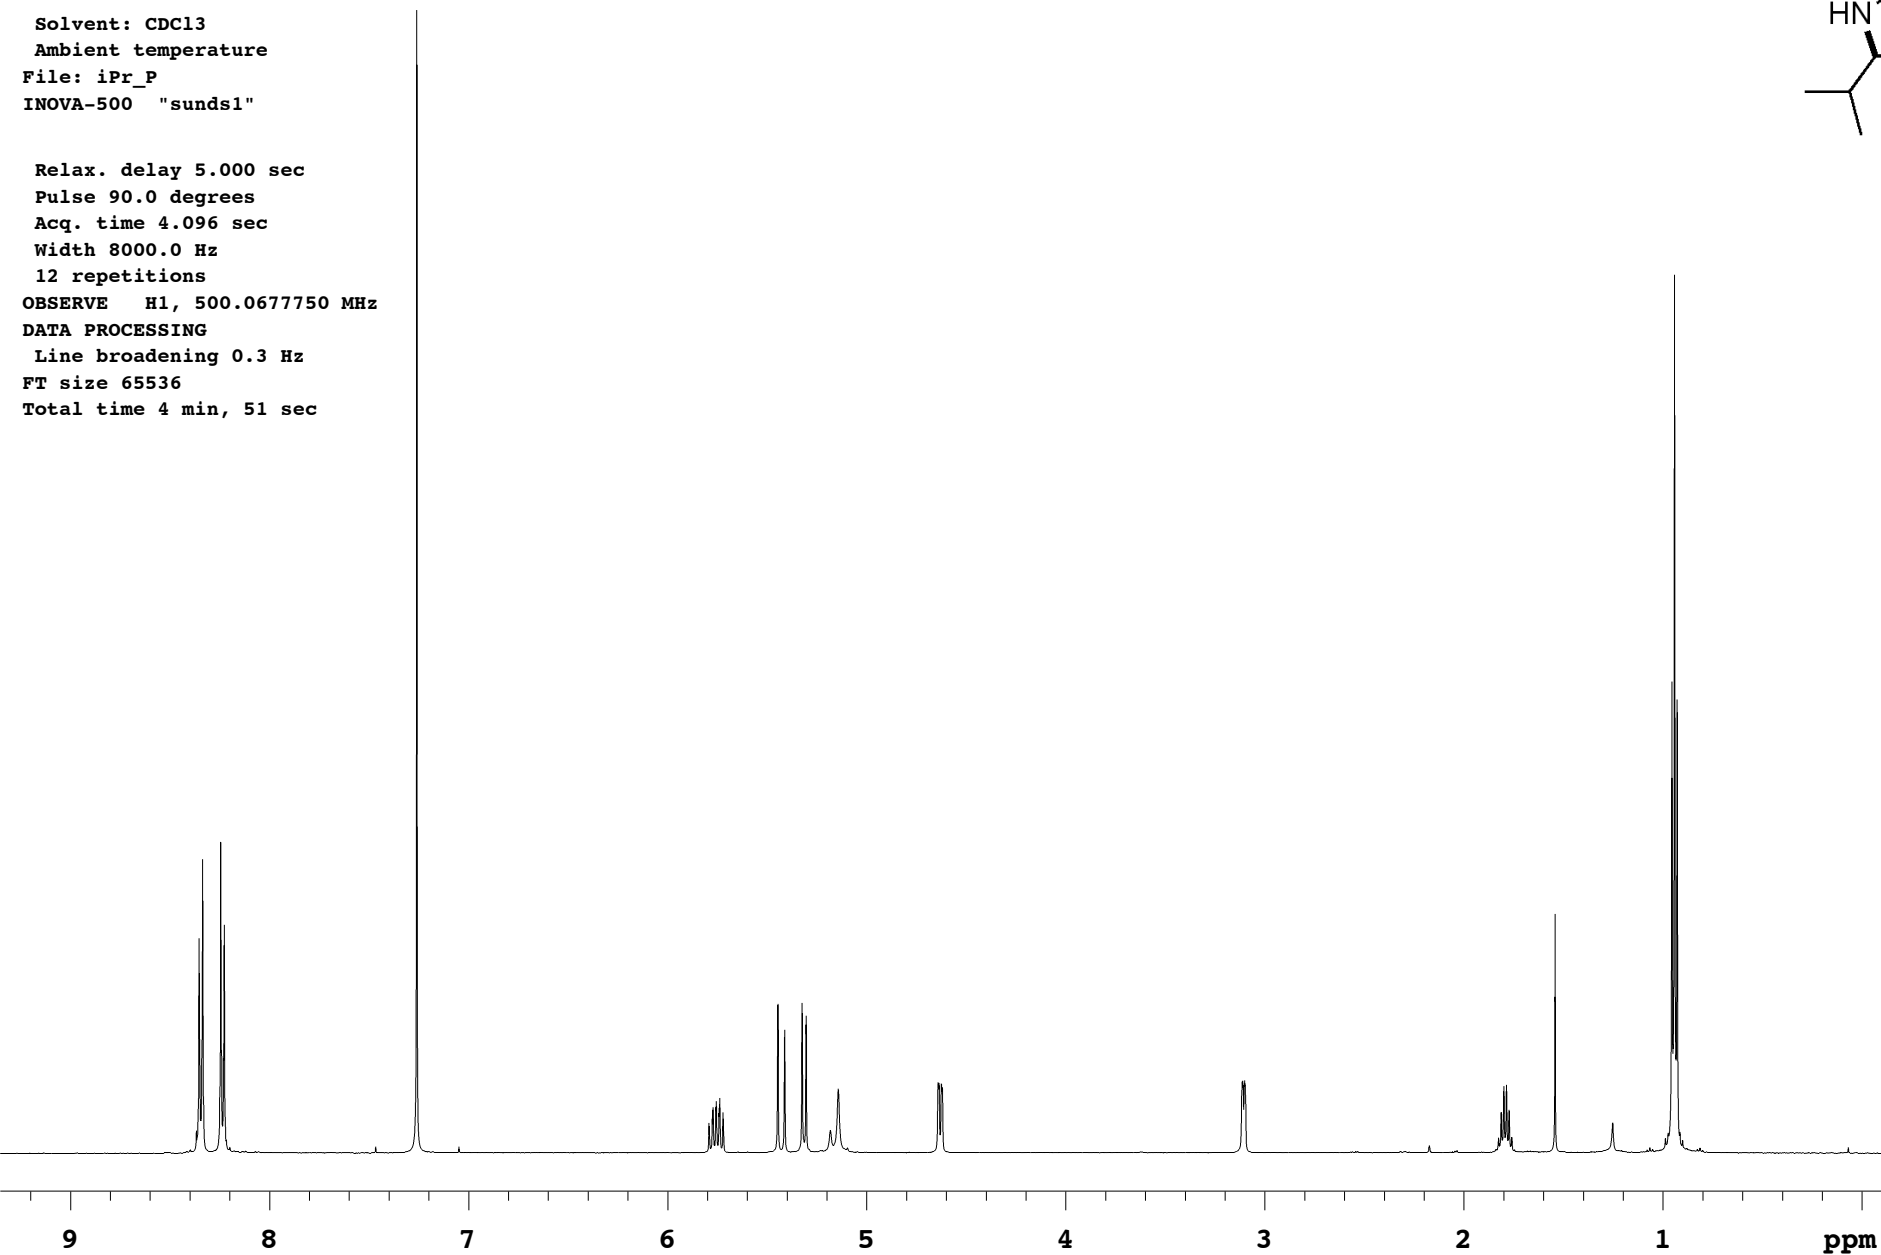



Pulse Sequence: s2pul

Solvent: CDCl<sub>3</sub>

Ambient temperature

User: 1-14-87

File: iPr\_P\_C

INOVA-500 "sunds1"

Relax. delay 5.000 sec

Pulse 45.0 degrees

Acq. time 1.024 sec

Width 32000.0 Hz

444 repetitions

OBSERVE C13, 125.5817166 MHz

DECOUPLE H1, 499.4315638 MHz

Power 48 dB

continuously on

WALTZ-16 modulated

DATA PROCESSING

Line broadening 1.0 Hz

FT size 65536

Total time 2 hr, 30 min, 55 sec

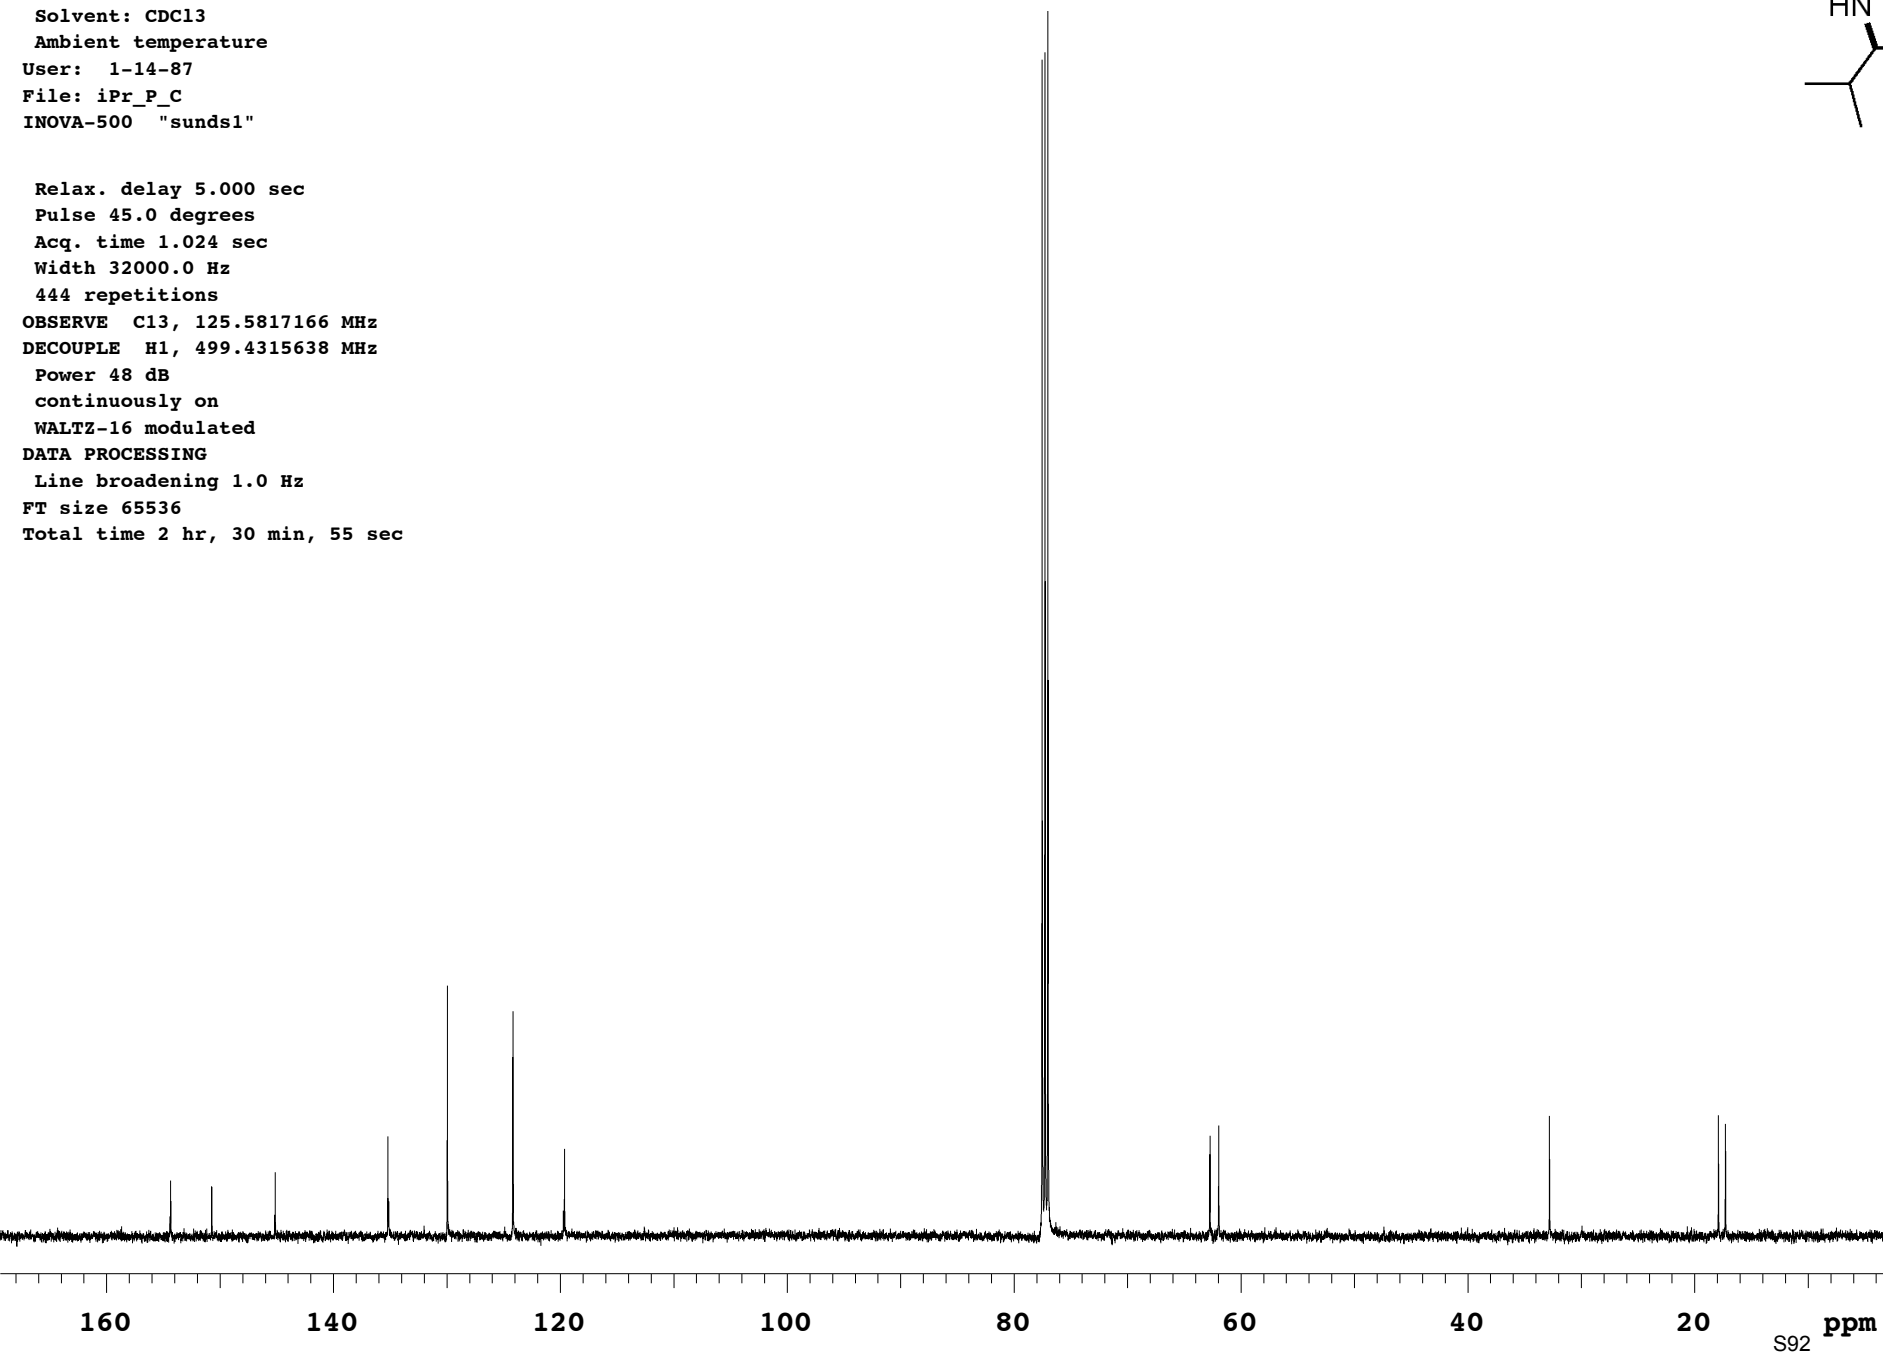

expl s2pul

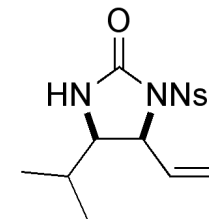

| SAMPLE              |                | DEC        |          |
|---------------------|----------------|------------|----------|
| date                | Jan 3 2013     | dfrq       |          |
| solvent             | CDC13          | dn         |          |
| file                | /export/home/~ | dpwr       |          |
| data/ui500nb/White~ |                | dof        |          |
| /bigi/MAB.syn.imid~ |                | dm         | nnn      |
| .recolumned.fid     |                | dmm        | c        |
| ACQUISITION         |                | dmf        | 200      |
| sfrq                | 500.070        | dseq       |          |
| tn                  | H1             | dres       | 1.0      |
| at                  | 4.096          | homo       | n        |
| np                  | 65536          | DEC2       |          |
| sw                  | 8000.0         | dfrq2      | 0        |
| fb                  | 4000           | dn2        |          |
| bs                  | 16             | dpwr2      | 1        |
| tpwr                | 58             | dof2       | 0        |
| pw                  | 6.5            | dm2        | n        |
| d1                  | 10.000         | dmm2       | c        |
| tof                 | 0              | dmf2       | 200      |
| nt                  | 16             | dseq2      |          |
| ct                  | 16             | dres2      | 1.0      |
| alock               | n              | homo2      | n        |
| gain                | not used       | PROCESSING |          |
| FLAGS               |                | lb         | 0.30     |
| il                  | n              | wtfile     |          |
| in                  | n              | proc       | ft       |
| dp                  | y              | fn         | not used |
| hs                  | nn             | math       | f        |
| DISPLAY             |                |            |          |
| sp                  | -527.0         | werr       |          |
| wp                  | 5739.0         | wexp       |          |
| vs                  | 34             | wbs        |          |
| sc                  | 0              | wnt        |          |
| wc                  | 250            |            |          |
| hzmm                | 22.96          |            |          |
| is                  | 33.57          |            |          |
| rfl                 | 5141.4         |            |          |
| rfp                 | 3630.5         |            |          |
| th                  | 7              |            |          |
| ins                 | 100.000        |            |          |
| ai                  | ph             |            |          |

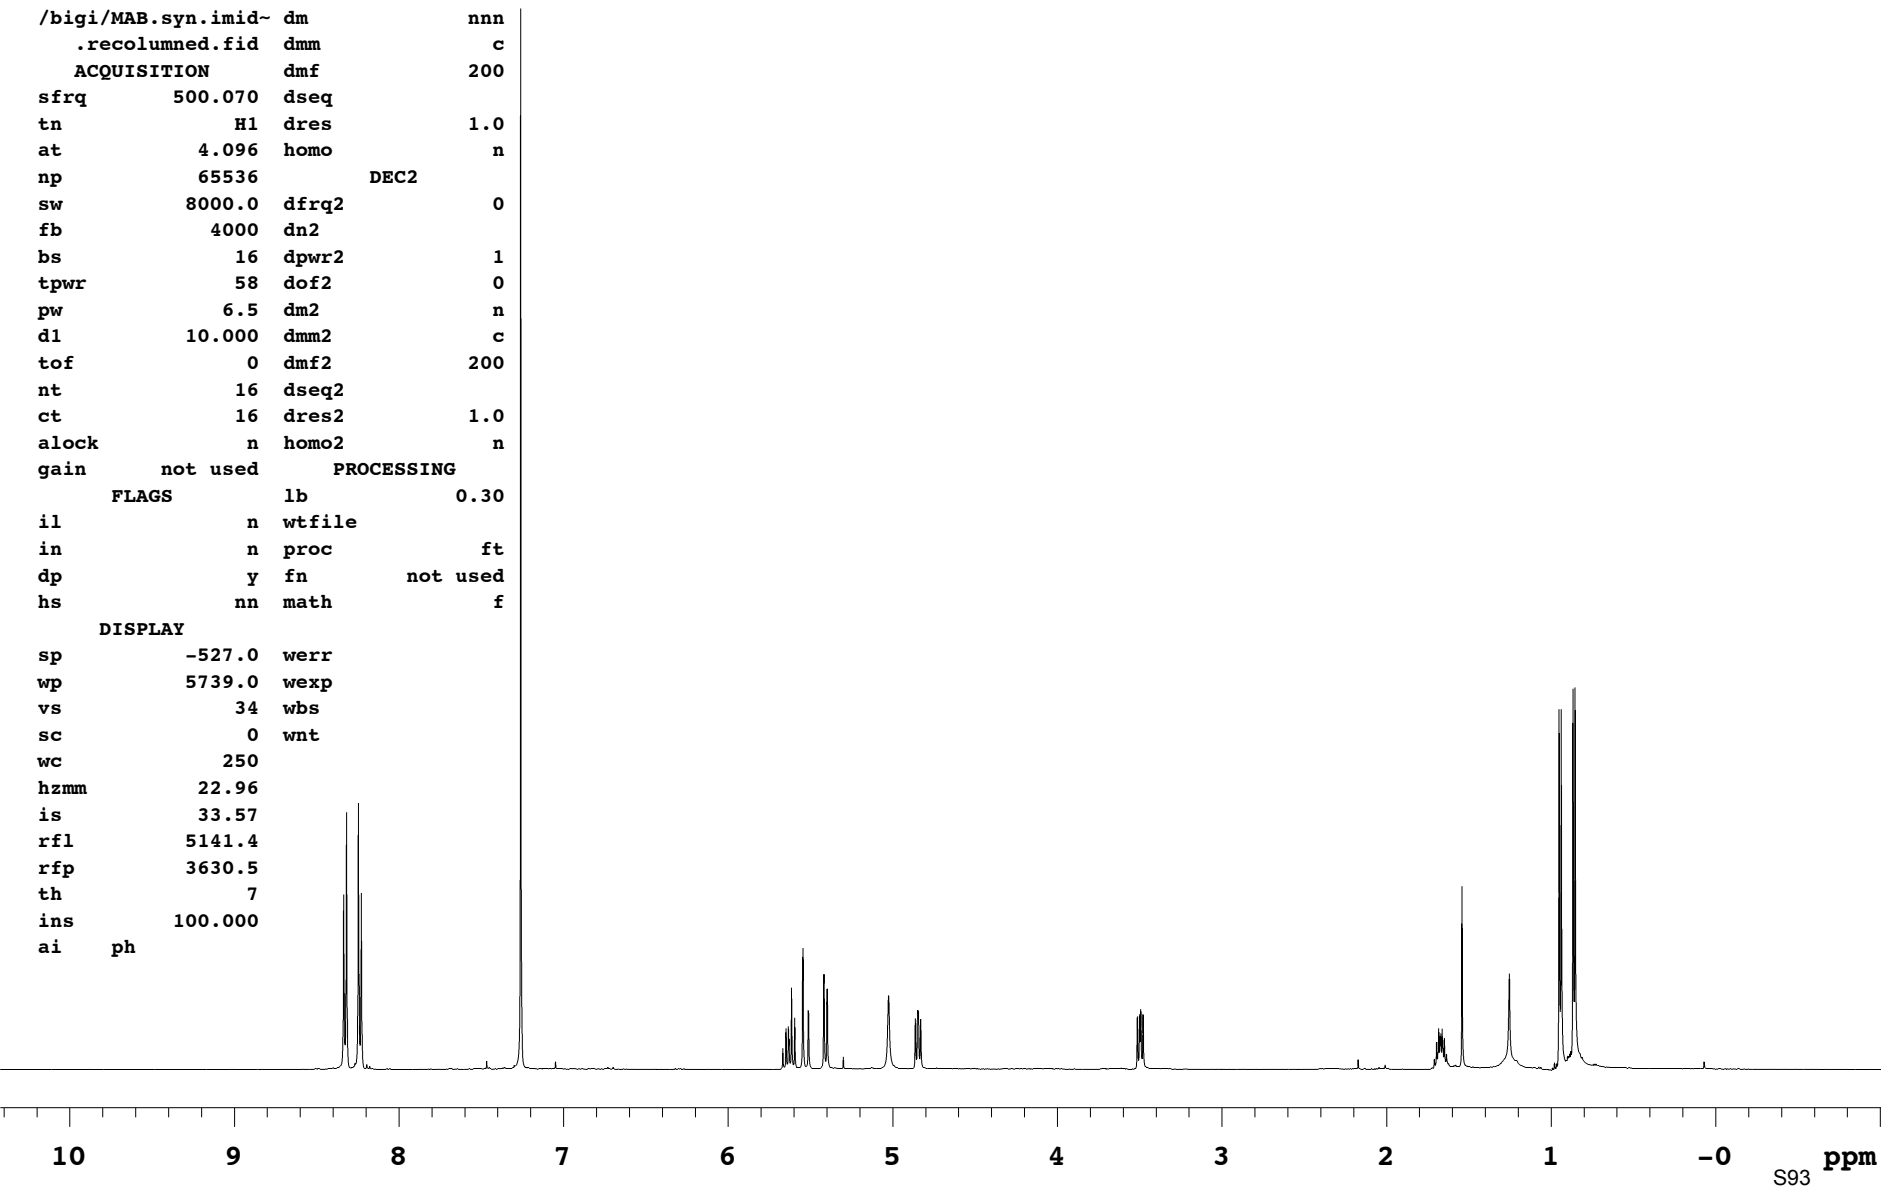

expl s2pul

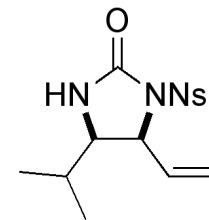

| SAMPLE              |                | DEC. & VT  |          |
|---------------------|----------------|------------|----------|
| date                | Jan 3 2013     | dfrq       | 499.692  |
| solvent             | CDC13          | dn         | H1       |
| file                | /export/home/~ | dpwr       | 45       |
| data/u500/White/bi- |                | dof        | -827.6   |
| gi/MAB.syn.imid.ca- |                | dm         | YYY      |
| rbon.fid            |                | dmm        | w        |
| ACQUISITION         |                | dmf        |          |
| sfrq                | 125.661        | dseq       | 20202    |
| tn                  | C13            | dres       | 90.0     |
| at                  | 1.086          | homo       | n        |
| np                  | 65536          | DEC2       |          |
| sw                  | 30165.9        | dfrq2      | 0        |
| fb                  | 17000          | dn2        |          |
| bs                  | 16             | dpwr2      | 1        |
| ss                  | 1              | dof2       | 0        |
| tpwr                | 60             | dm2        | n        |
| pw                  | 6.0            | dmm2       | c        |
| d1                  | 1.000          | dmf2       | 10000    |
| tof                 | 1884.7         | dseq2      |          |
| nt                  | 1500           | dres2      | 1.0      |
| ct                  | 1184           | homo2      | n        |
| alock               | n              | PROCESSING |          |
| gain                | not used       | lb         | 1.00     |
| FLAGS               |                | wtfile     |          |
| il                  | n              | proc       | ft       |
| in                  | n              | fn         | not used |
| dp                  | y              | math       | f        |
| hs                  | nn             |            |          |
| DISPLAY             |                | werr       |          |
| sp                  | 9.4            | wexp       |          |
| wp                  | 27603.0        | wbs        |          |
| vs                  | 219            | wnt        |          |
| sc                  | 0              |            |          |
| wc                  | 250            |            |          |
| hzmm                | 110.41         |            |          |
| is                  | 500.00         |            |          |
| rfl                 | 10967.0        |            |          |
| rfp                 | 9694.9         |            |          |
| th                  | 5              |            |          |
| ins                 | 100.000        |            |          |
| nm                  | ph             |            |          |

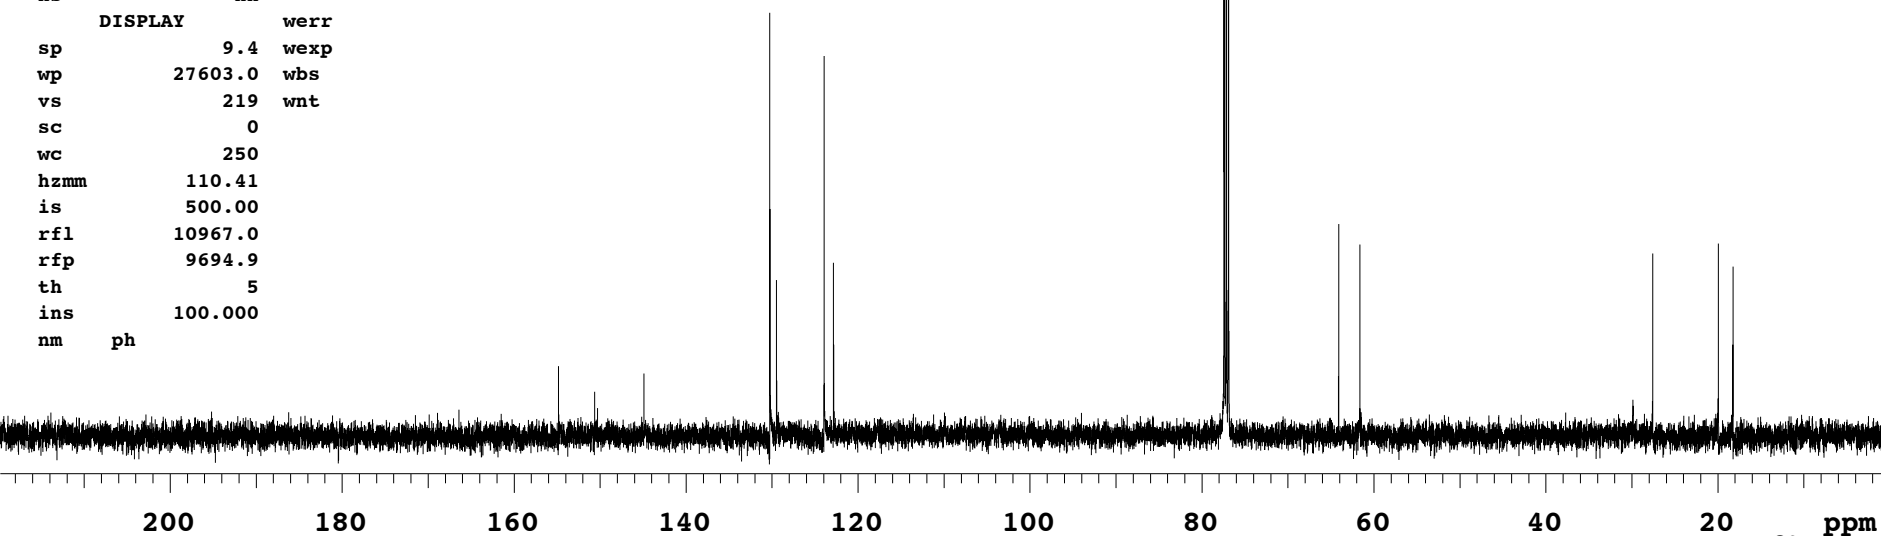

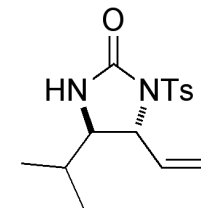

Pulse Sequence: s2pul

Solvent: CDCl<sub>3</sub>

Ambient temperature

File: iPrTs\_anti\_diamine

INOVA-500 "sunds1"

Relax. delay 5.000 sec

Pulse 90.0 degrees

Acq. time 4.096 sec

Width 8000.0 Hz

6 repetitions

OBSERVE H1, 500.0677753 MHz

DATA PROCESSING

Line broadening 0.3 Hz

FT size 65536

Total time 1 min, 12 sec

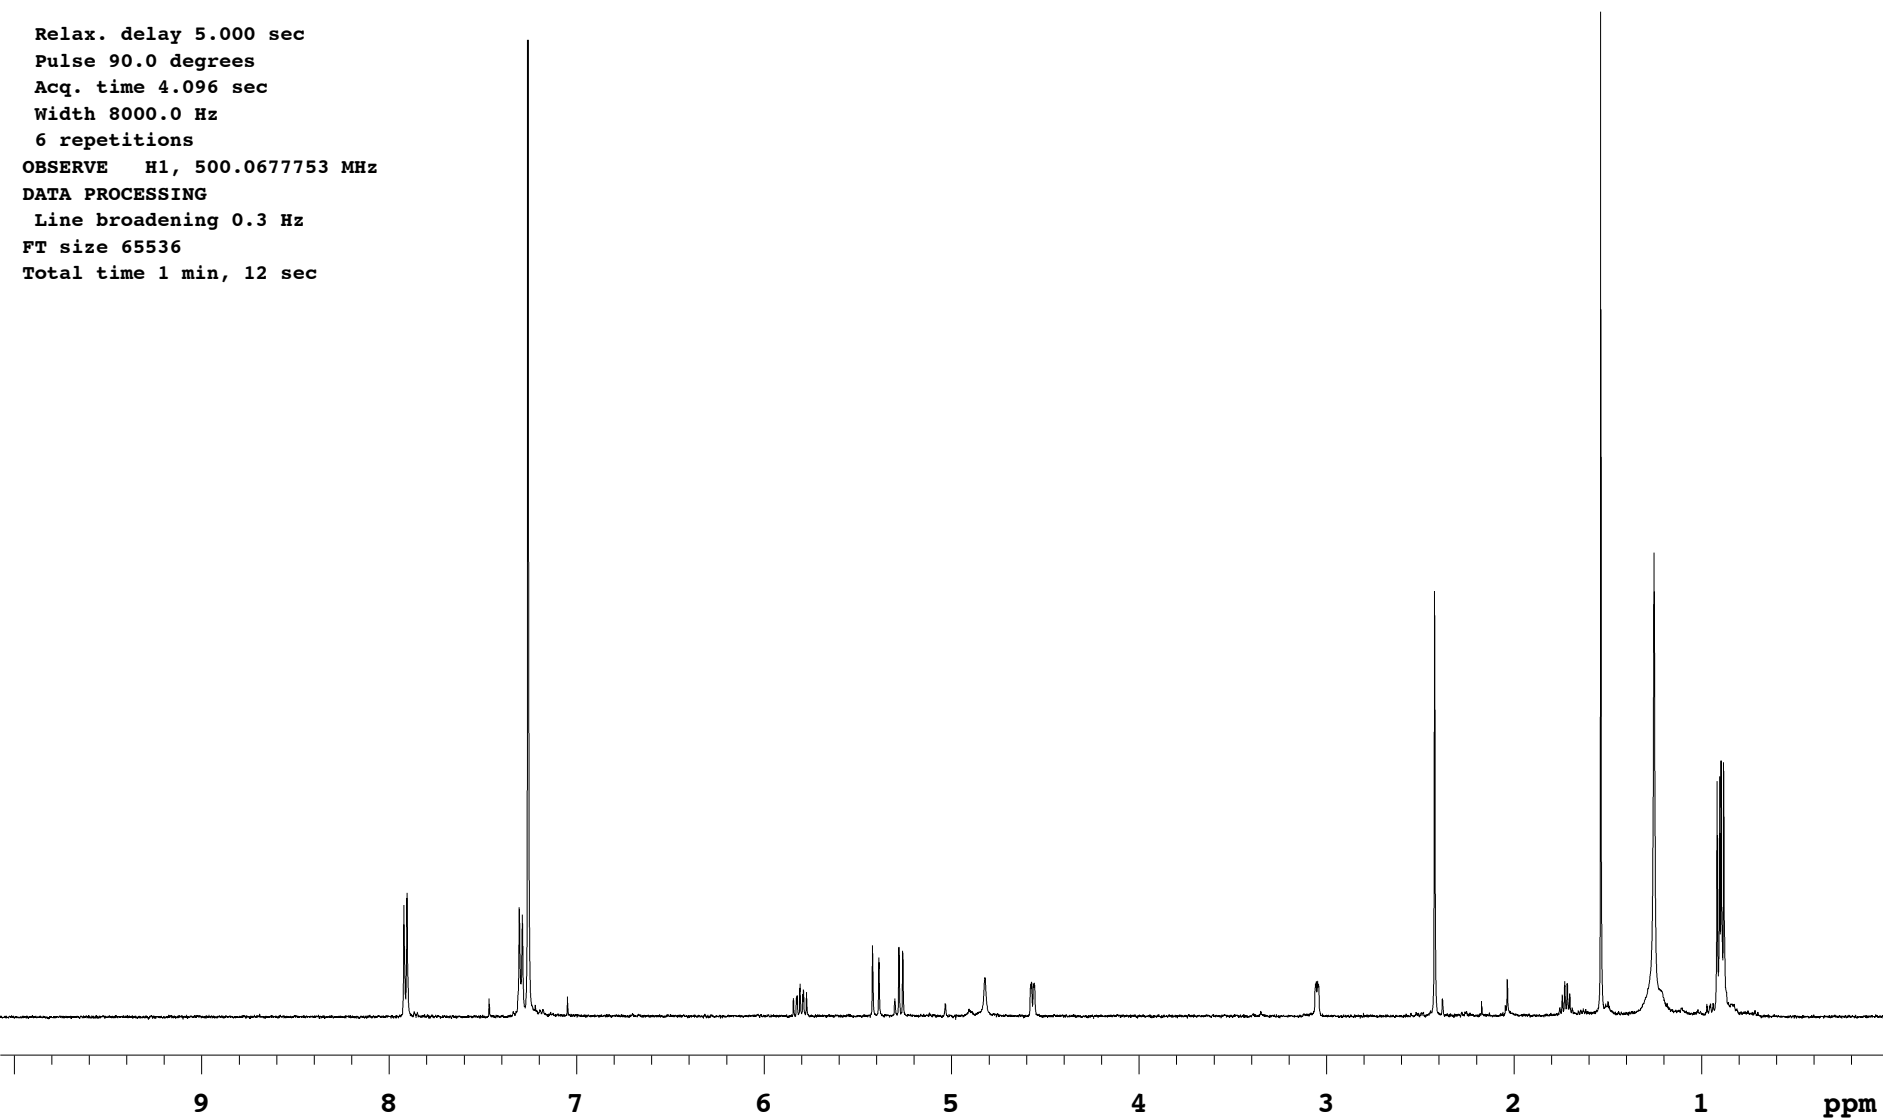

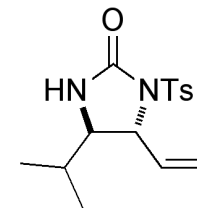

Pulse Sequence: s2pul

Solvent: CDCl<sub>3</sub>

Ambient temperature

User: 1-14-87

INOVA-500 "vxr500"

Relax. delay 1.000 sec

Pulse 45.0 degrees

Acq. time 1.024 sec

Width 32000.0 Hz

3526 repetitions

OBSERVE C13, 125.5817483 MHz

DECOUPLE H1, 499.4315638 MHz

Power 47 dB

continuously on

WALTZ-16 modulated

DATA PROCESSING

Line broadening 1.0 Hz

FT size 65536

Total time 3 hr, 36 min, 52 sec

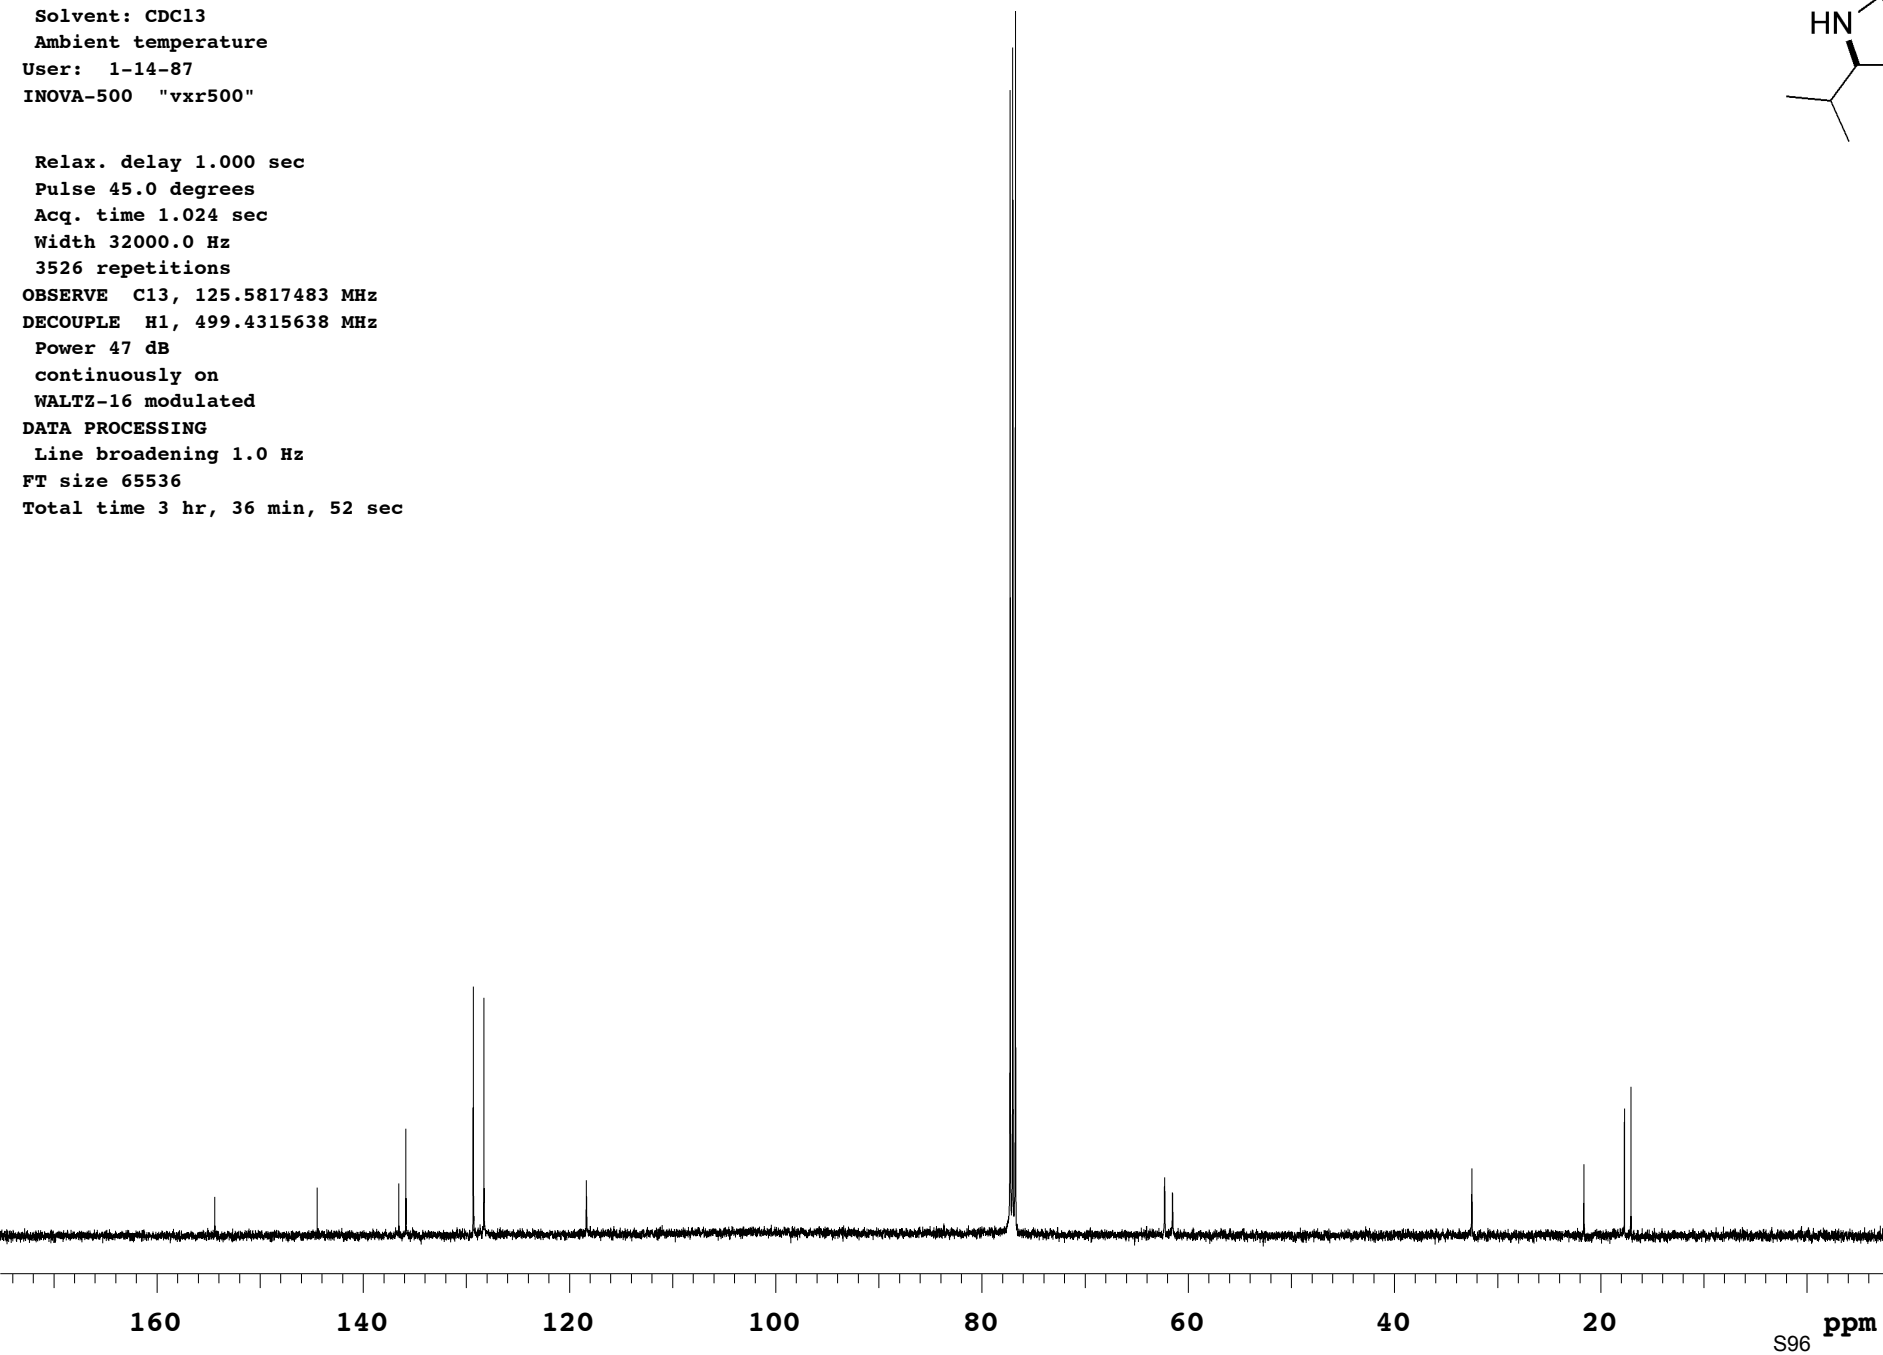

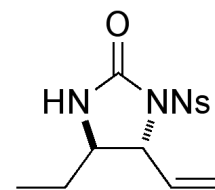

Pulse Sequence: s2pul

Solvent: CDCl3

Ambient temperature

File: Et\_P2

INOVA-500 "sunds1"

Relax. delay 5.000 sec

Pulse 90.0 degrees

Acq. time 4.096 sec

Width 8000.0 Hz

6 repetitions

OBSERVE H1, 500.0677753 MHz

DATA PROCESSING

Line broadening 0.3 Hz

FT size 65536

Total time 1 min, 12 sec

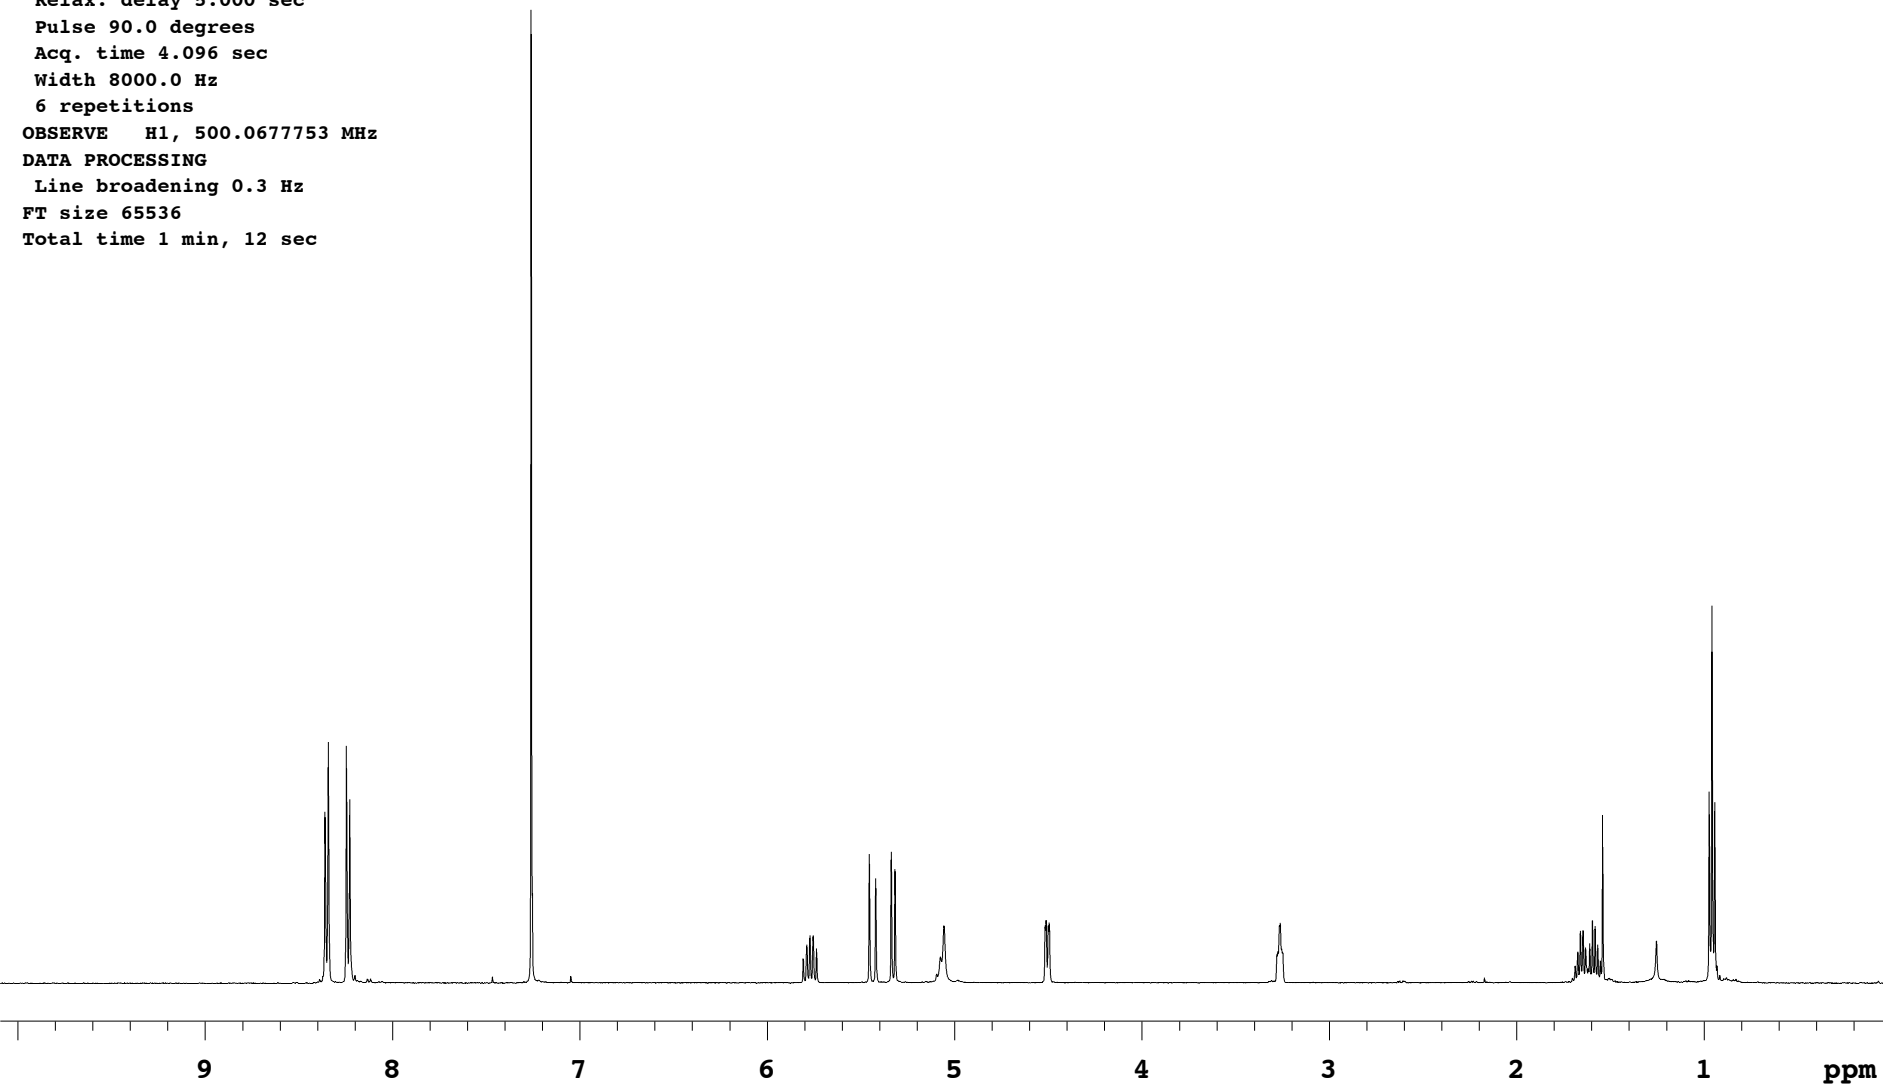



Et\_P

# Strambeanu and White

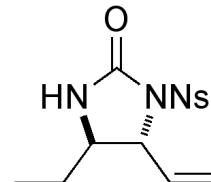

Pulse Sequence: s2pul

Solvent: CDCl3

Ambient temperature

User: 1-14-87

INOVA-500 "u500"

Relax. delay 1.000 sec

Pulse 28.1 degrees

Acq. time 1.086 sec

Width 30165.9 Hz

480 repetitions

OBSERVE C13, 125.6473203 MHz

DECOUPLE H1, 499.6923275 MHz

Power 45 dB

continuously on

WALTZ-16 modulated

DATA PROCESSING

Line broadening 1.0 Hz

FT size 65536

Total time 3 hr, 43 min, 31 sec

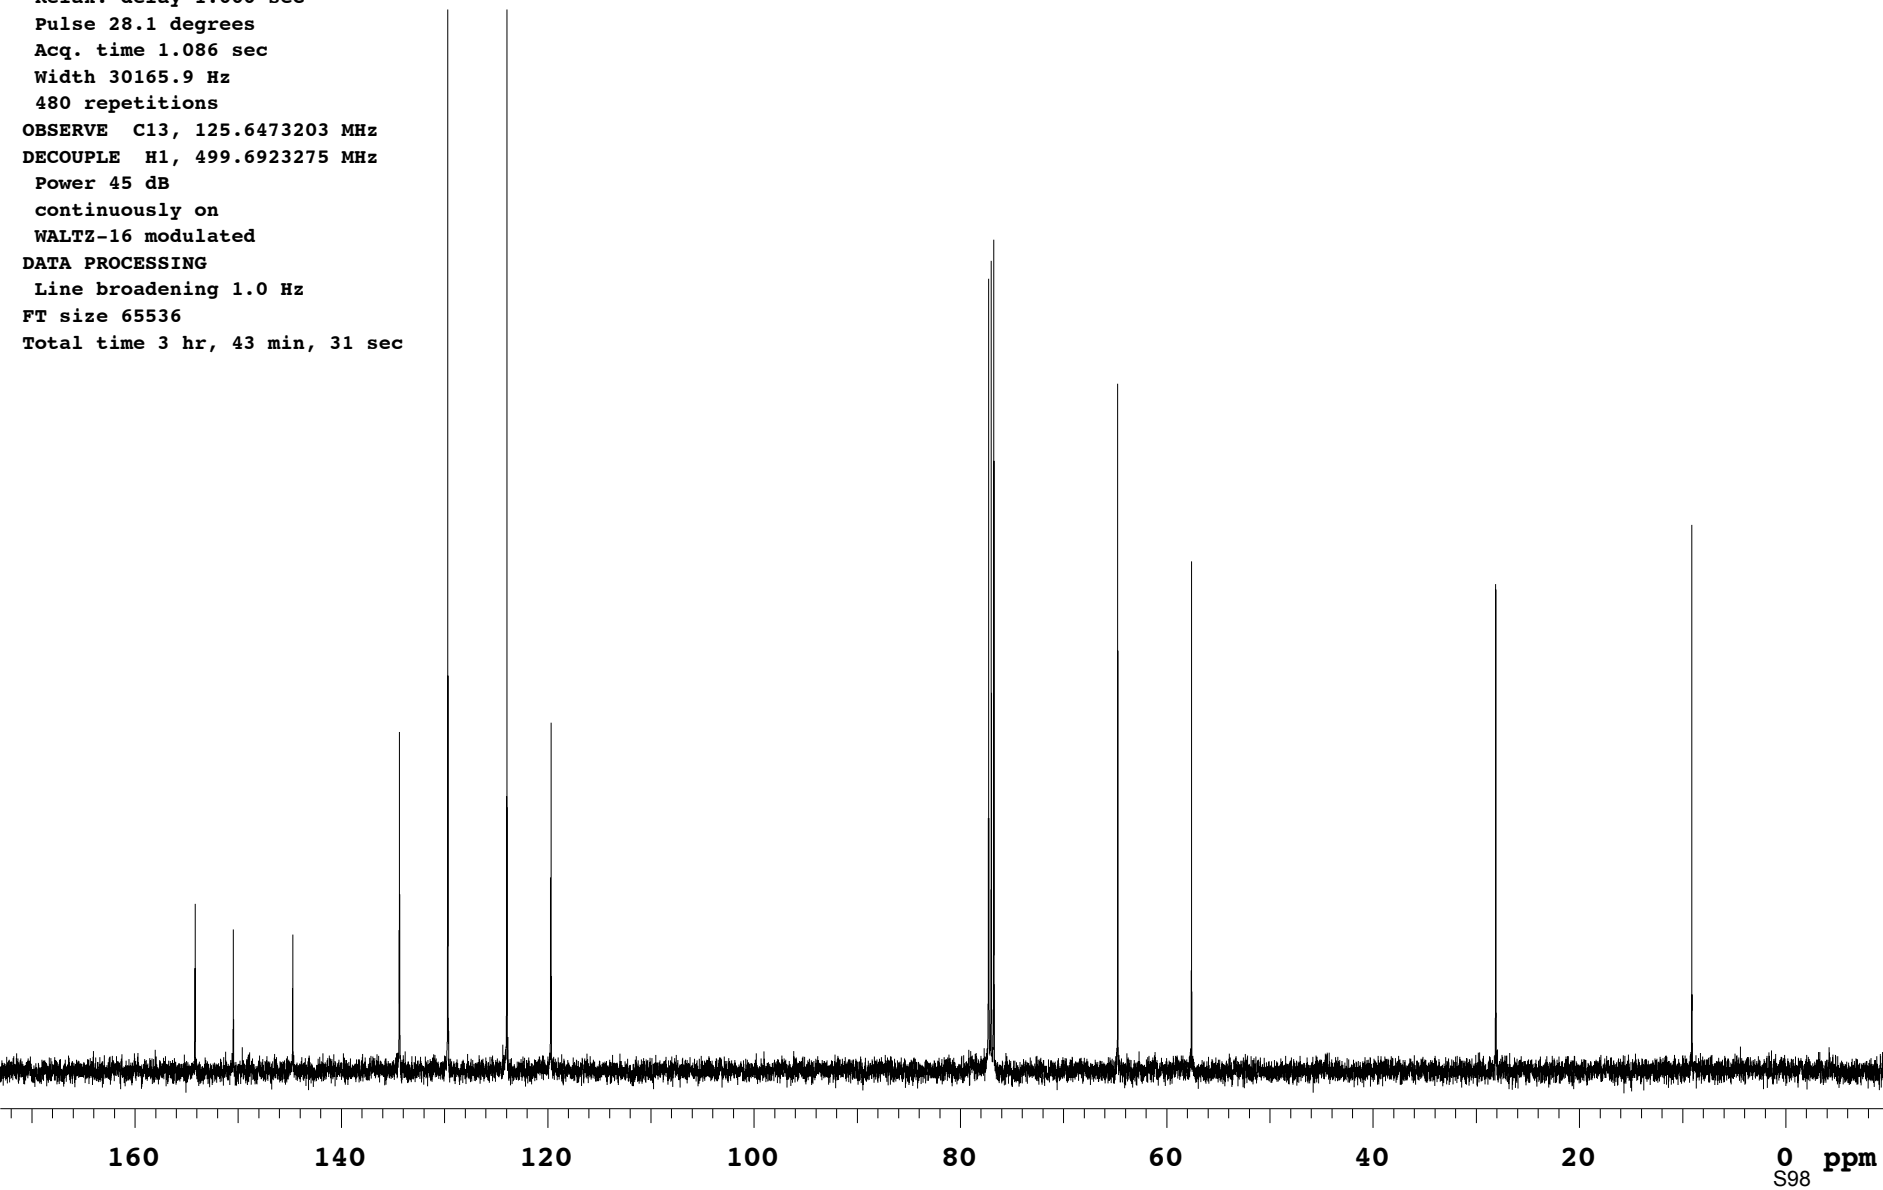

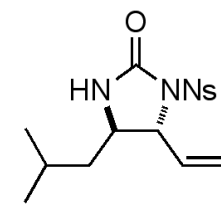

STANDARD PROTON PARAMETERS

Pulse Sequence: s2pul

Solvent: CDCl<sub>3</sub>

Ambient temperature

INOVA-500 "ui500nb"

Relax. delay 5.000 sec

Pulse 90.0 degrees

Acq. time 4.096 sec

Width 8000.0 Hz

12 repetitions

OBSERVE H1, 500.0677750 MHz

DATA PROCESSING

Line broadening 0.3 Hz

FT size 65536

Total time 1 min, 49 sec

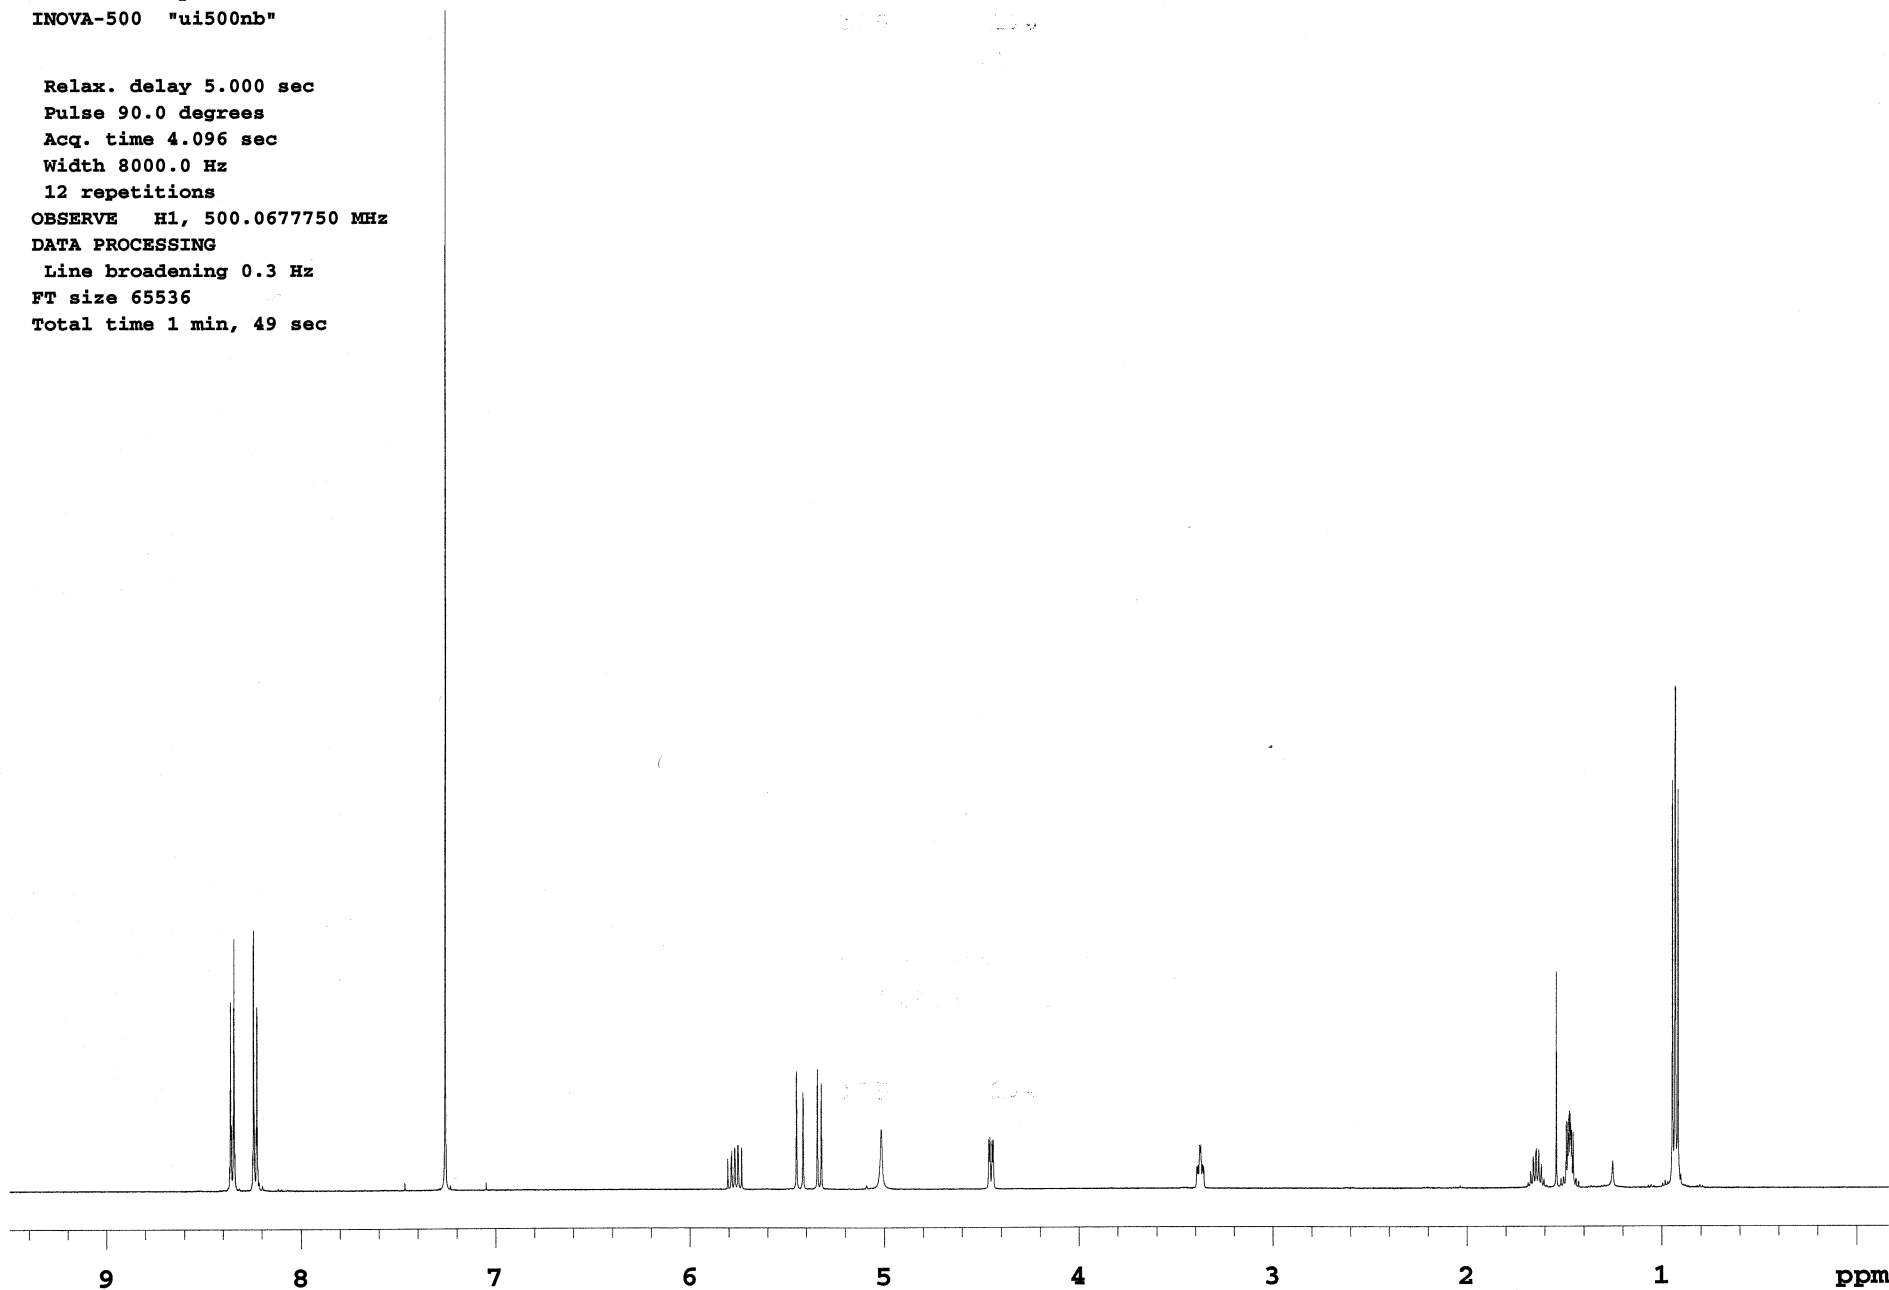

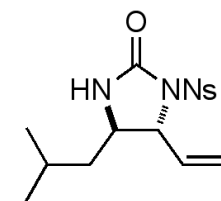

Pulse Sequence: s2pul

Solvent: CDCl3

Ambient temperature

User: 1-14-87

File: iBu\_P

INOVA-500 "sunds1"

Relax. delay 5.000 sec

Pulse 65.9 degrees

Acq. time 1.086 sec

Width 30165.9 Hz

228 repetitions

OBSERVE C13, 125.6472855 MHz

DECOUPLE H1, 499.6923275 MHz

Power 44 dB

continuously on

WALTZ-16 modulated

DATA PROCESSING

Line broadening 1.0 Hz

FT size 65536

Total time 40 min, 44 sec

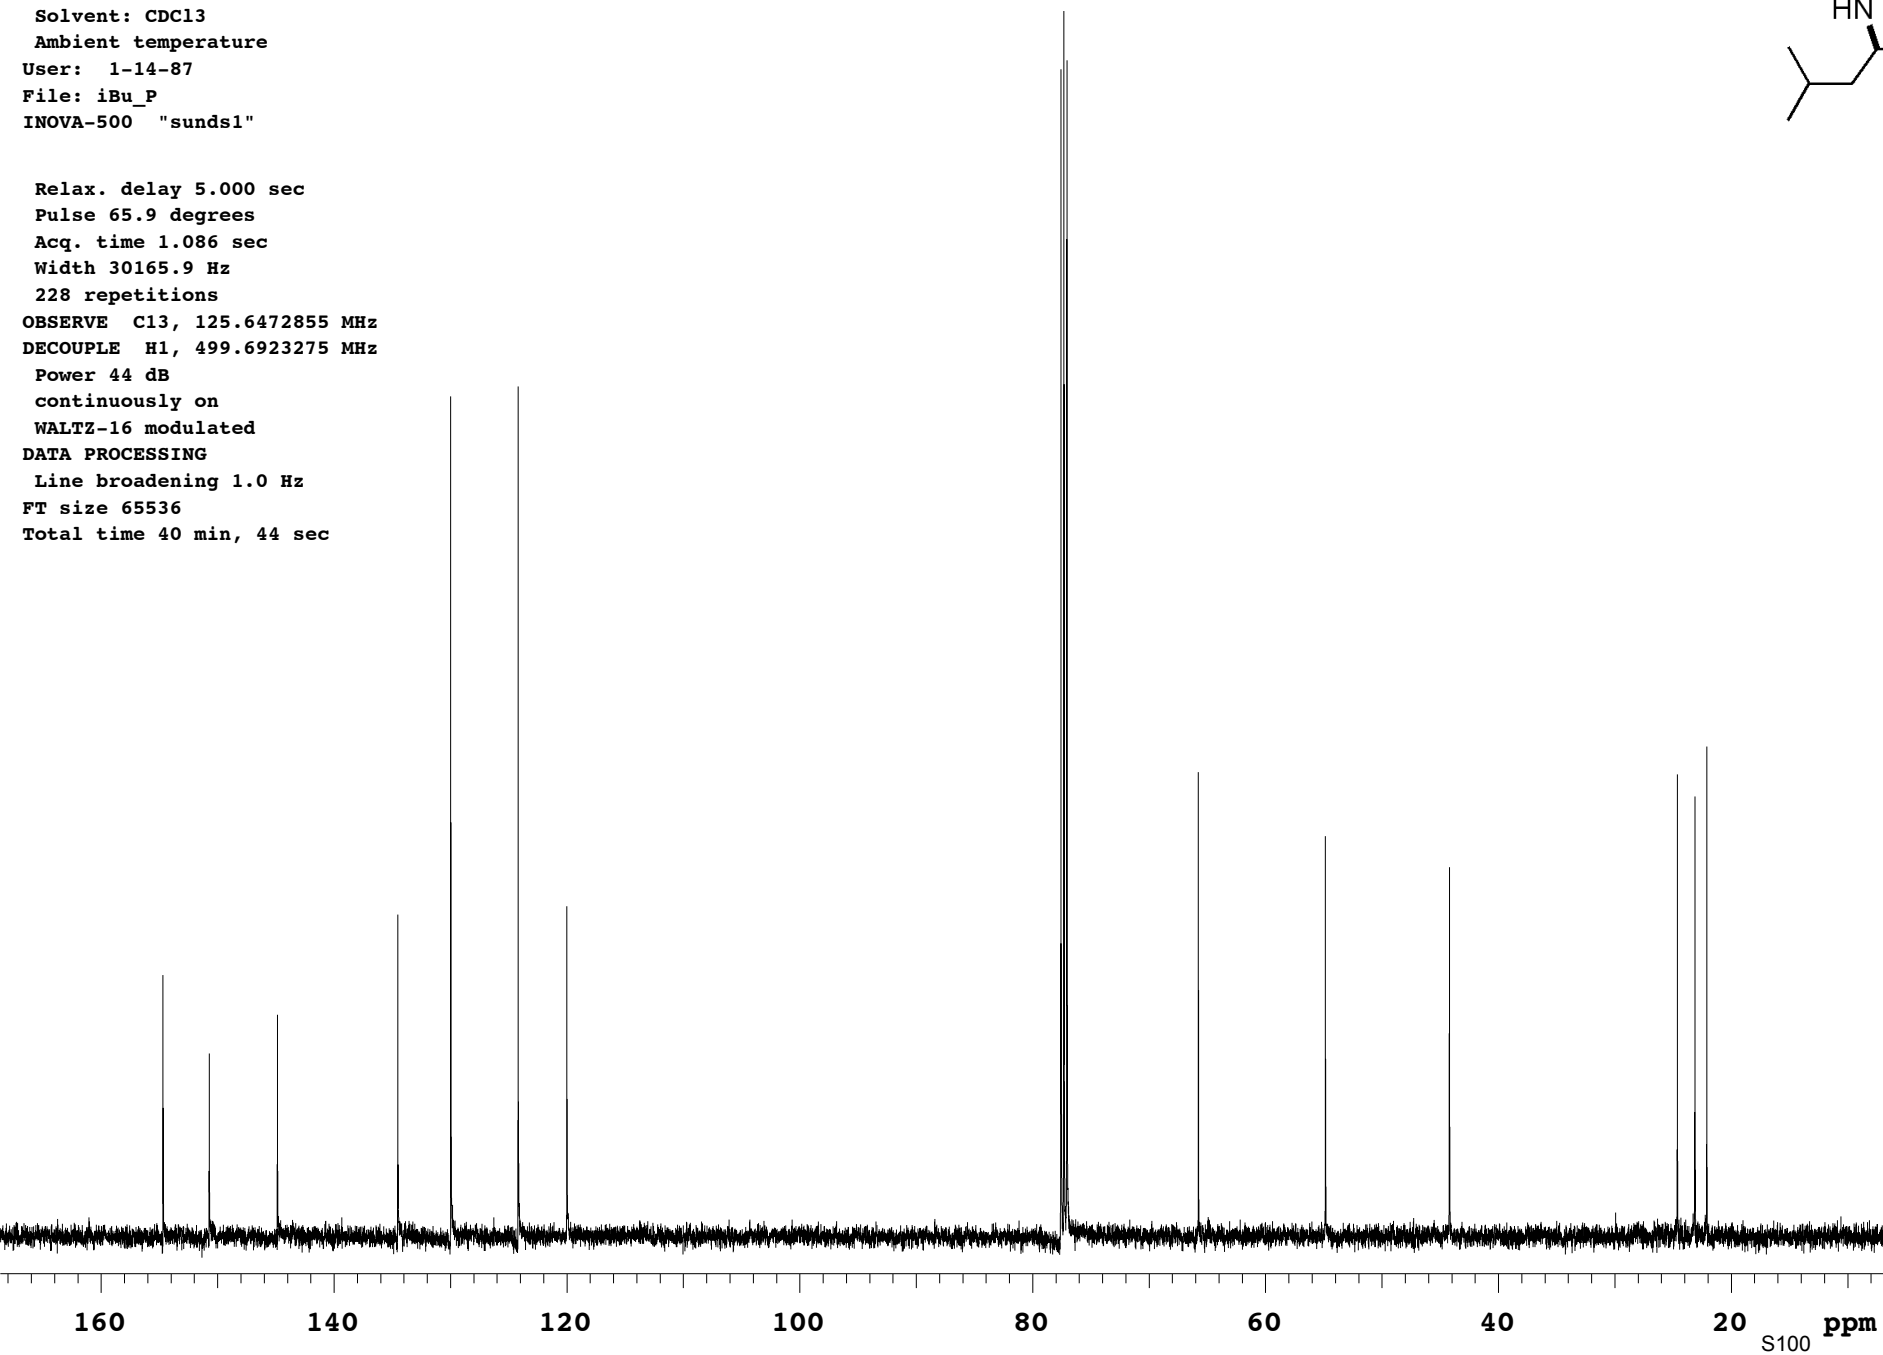

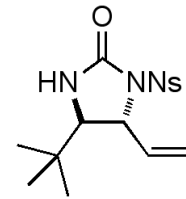

STANDARD PROTON PARAMETERS

Pulse Sequence: s2pul

Solvent: CDCl3

Ambient temperature

INOVA-500 "ui500nb"

Relax. delay 5.000 sec

Pulse 90.0 degrees

Acq. time 4.096 sec

Width 8000.0 Hz

12 repetitions

OBSERVE H1, 500.0677750 MHz

DATA PROCESSING

Line broadening 0.3 Hz

FT size 65536

Total time 1 min, 49 sec

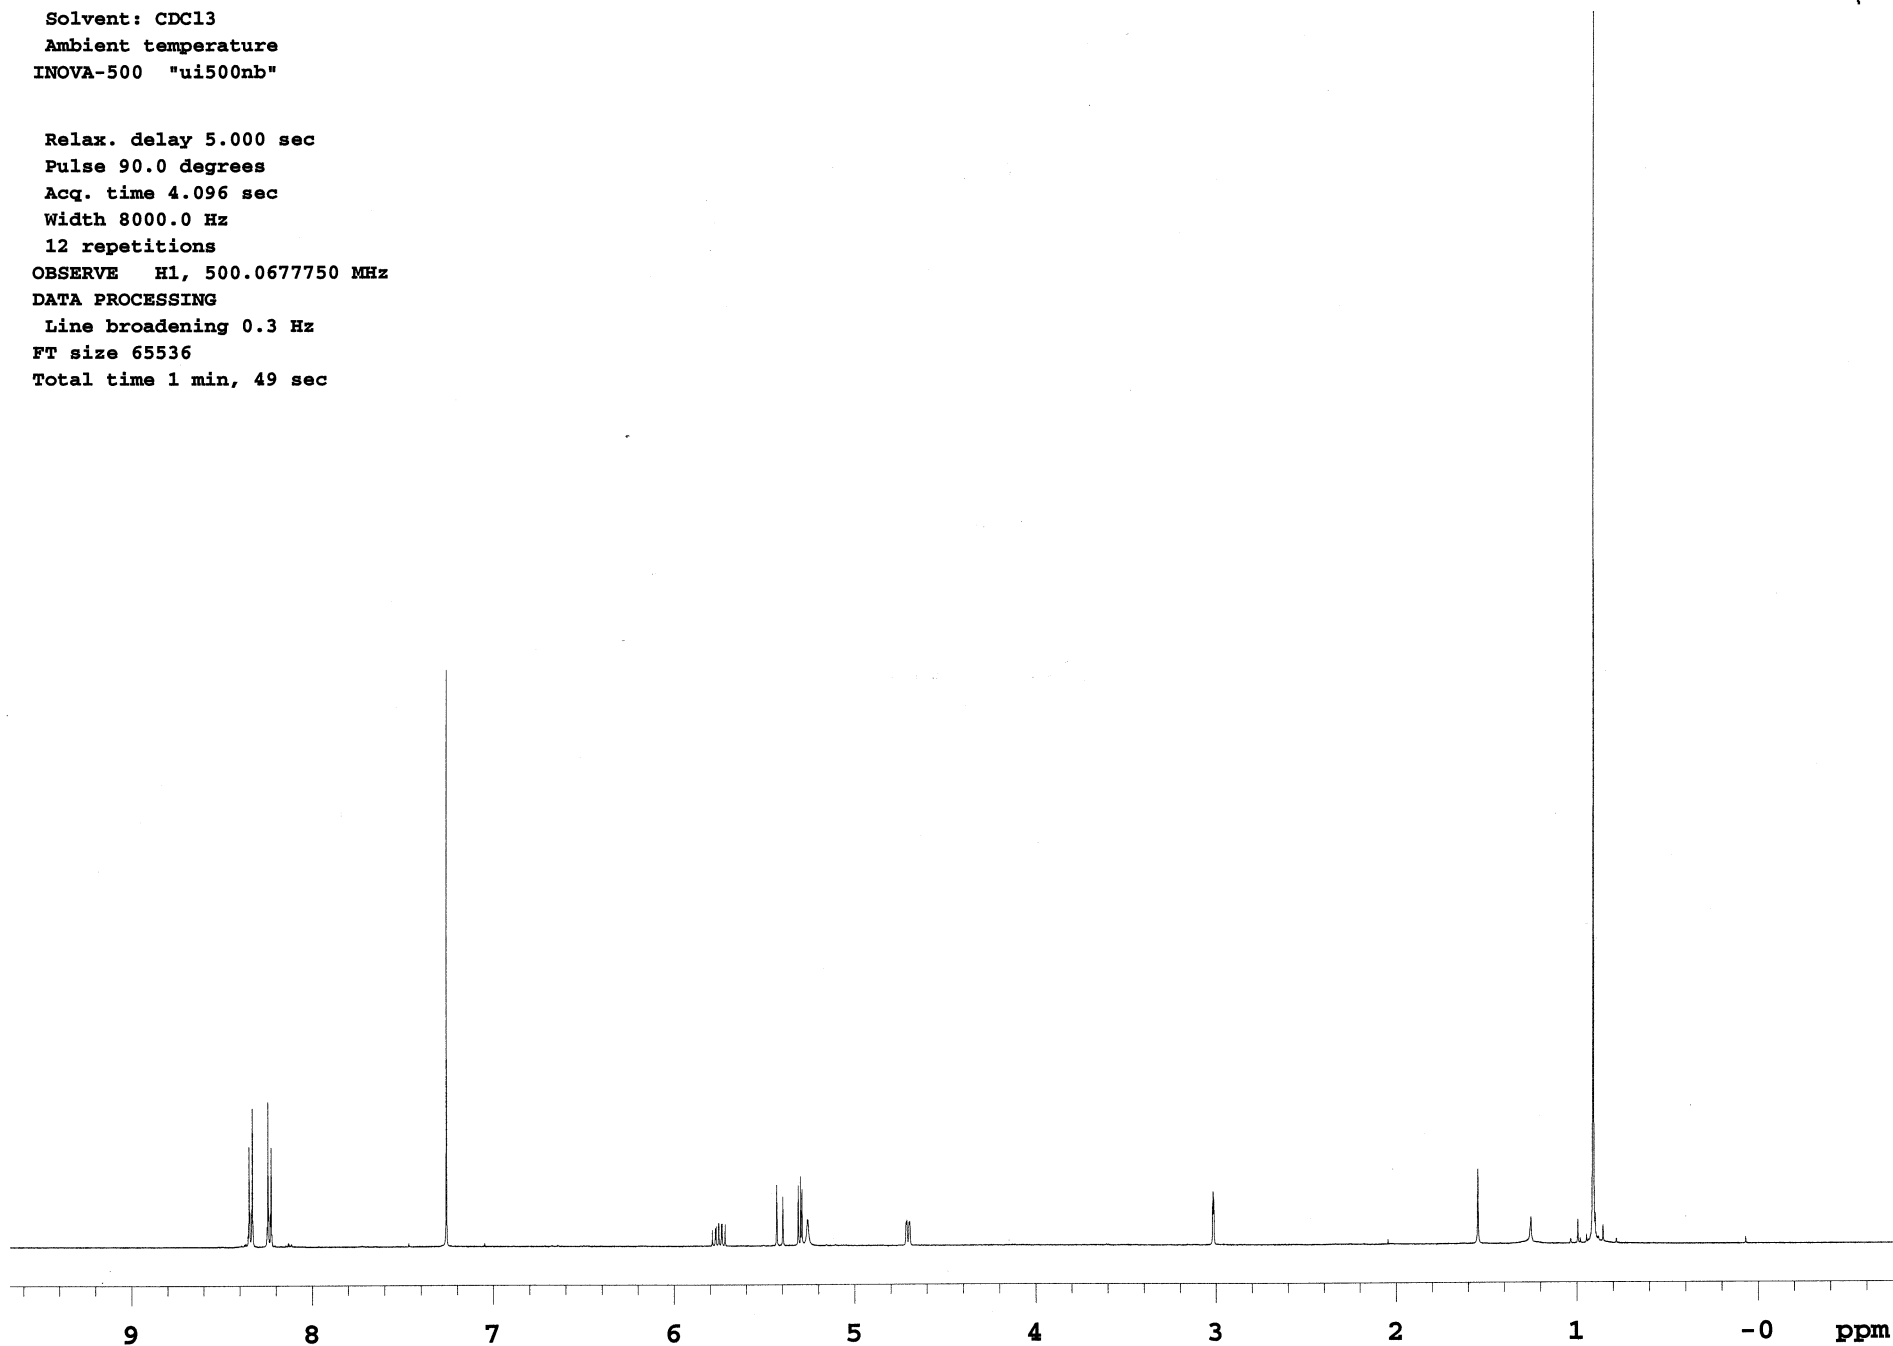

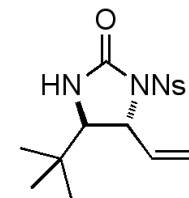

Pulse Sequence: s2pul

Solvent: CDCl<sub>3</sub>

Ambient temperature

User: 1-14-87

File: tBu\_P

INOVA-500 "sunds1"

Relax. delay 5.000 sec

Pulse 65.9 degrees

Acq. time 1.086 sec

Width 30165.9 Hz

216 repetitions

OBSERVE C13, 125.6472855 MHz

DECOUPLE H1, 499.6923275 MHz

Power 44 dB

continuously on

WALTZ-16 modulated

DATA PROCESSING

Line broadening 1.0 Hz

FT size 65536

Total time 40 min, 44 sec

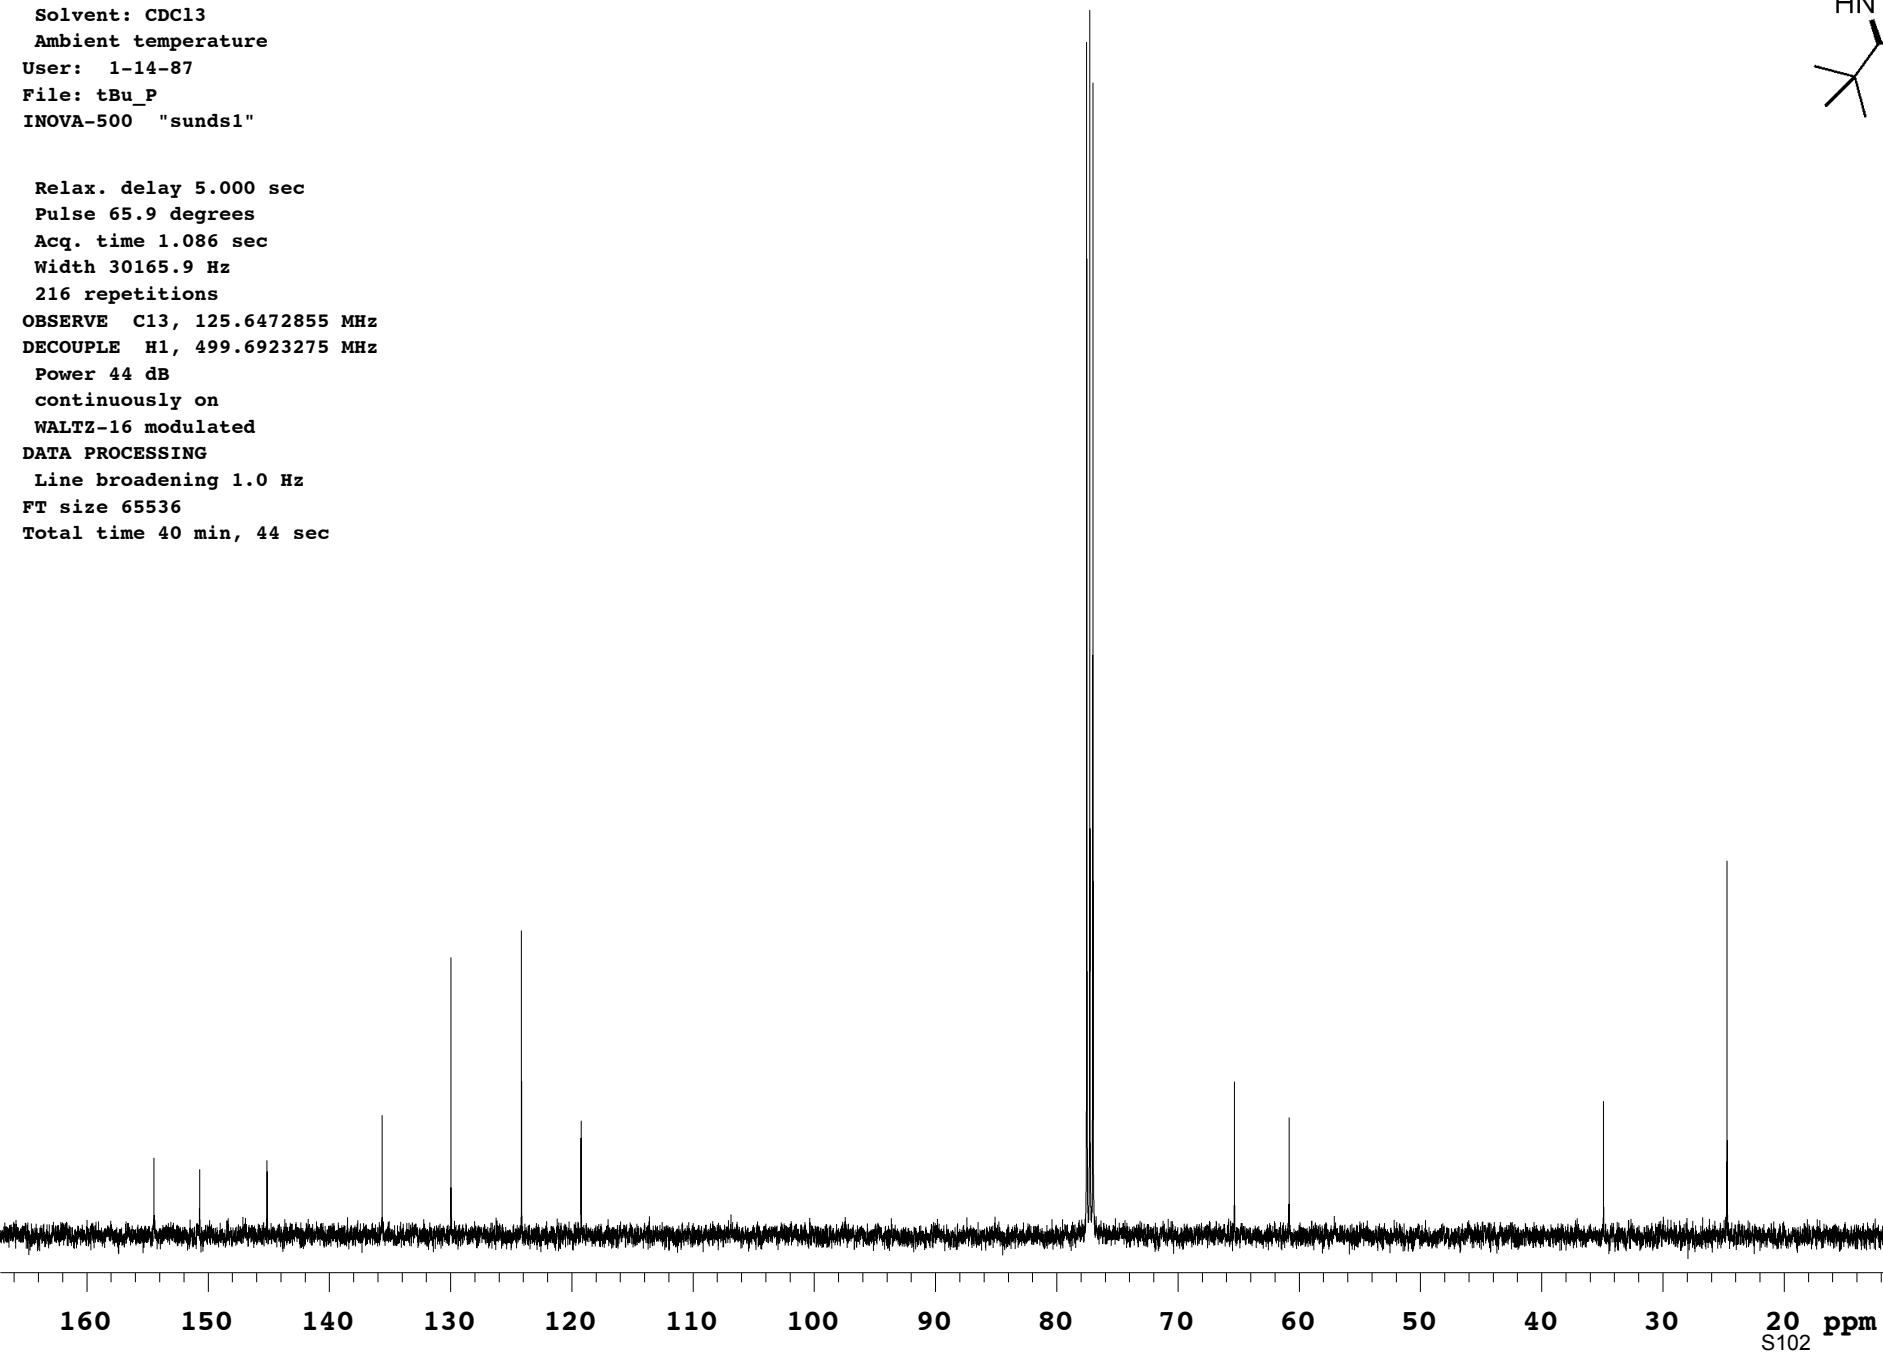

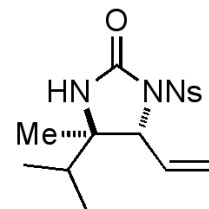

Pulse Sequence: s2pul

Solvent: CDC13

Ambient temperature

File: quat\_P

INOVA-500 "sunds1"

Relax. delay 5.000 sec

Pulse 90.0 degrees

Acq. time 4.096 sec

Width 8000.0 Hz

10 repetitions

OBSERVE H1, 500.0677753 MHz

DATA PROCESSING

Line broadening 0.3 Hz

FT size 65536

Total time 2 min, 25 sec

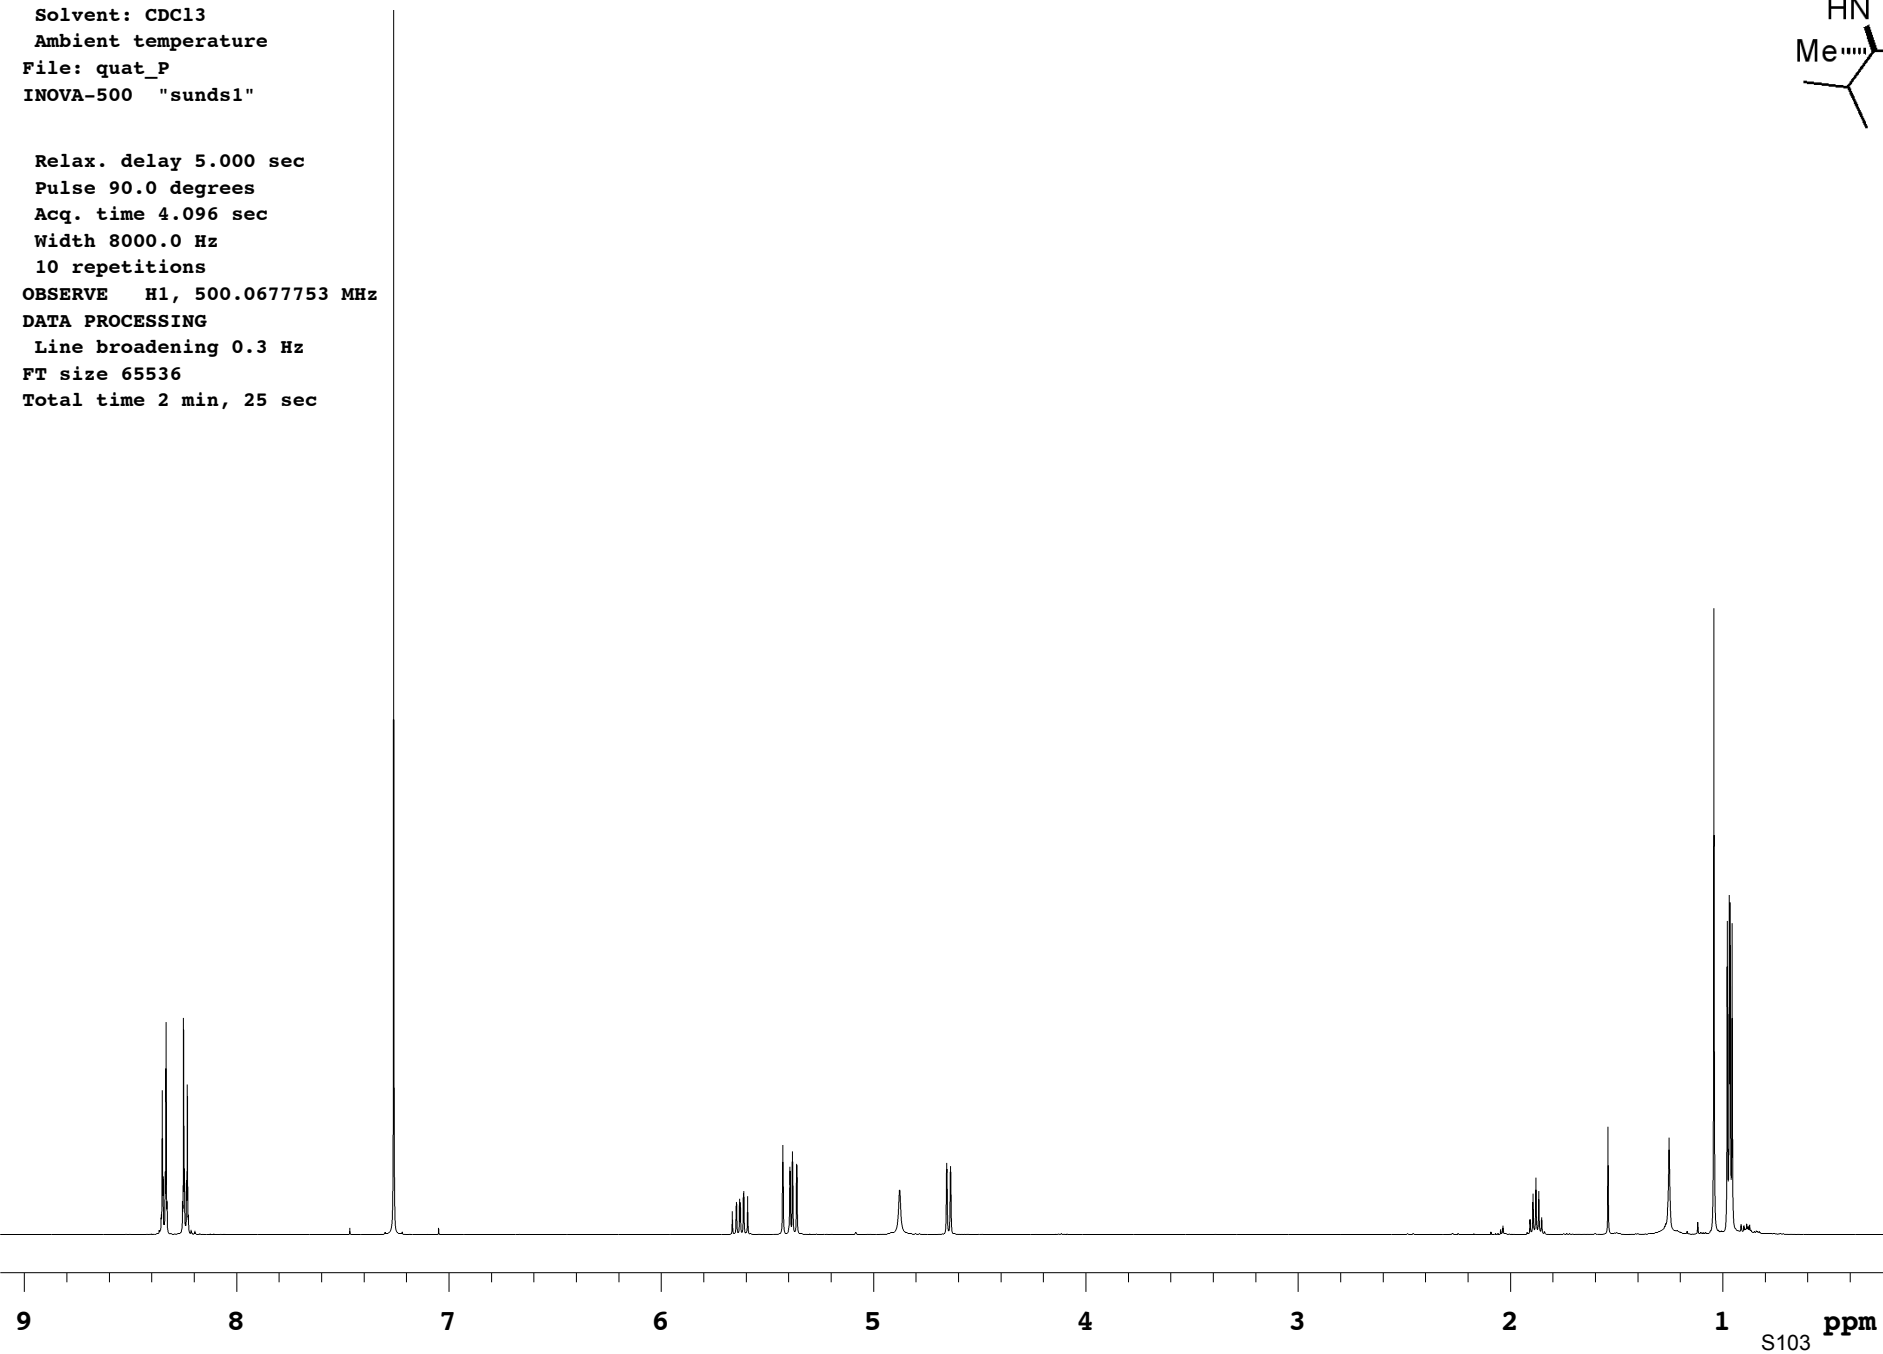

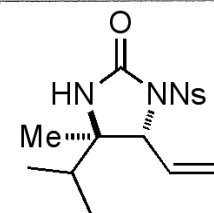

## STANDARD CARBON PARAMETERS

Pulse Sequence: s2pul

Solvent: CDCl<sub>3</sub>

Ambient temperature

User: 1-14-87

INOVA-500 "vxr500"

Relax. delay 5.000 sec

Pulse 45.0 degrees

Acq. time 1.024 sec

Width 32000.0 Hz

360 repetitions

OBSERVE C13, 125.5817166 MHz

DECOUPLE H1, 499.4315638 MHz

Power 44 dB

continuously on

WALTZ-16 modulated

DATA PROCESSING

Line broadening 1.0 Hz

FT size 65536

Total time 51 min, 34 sec

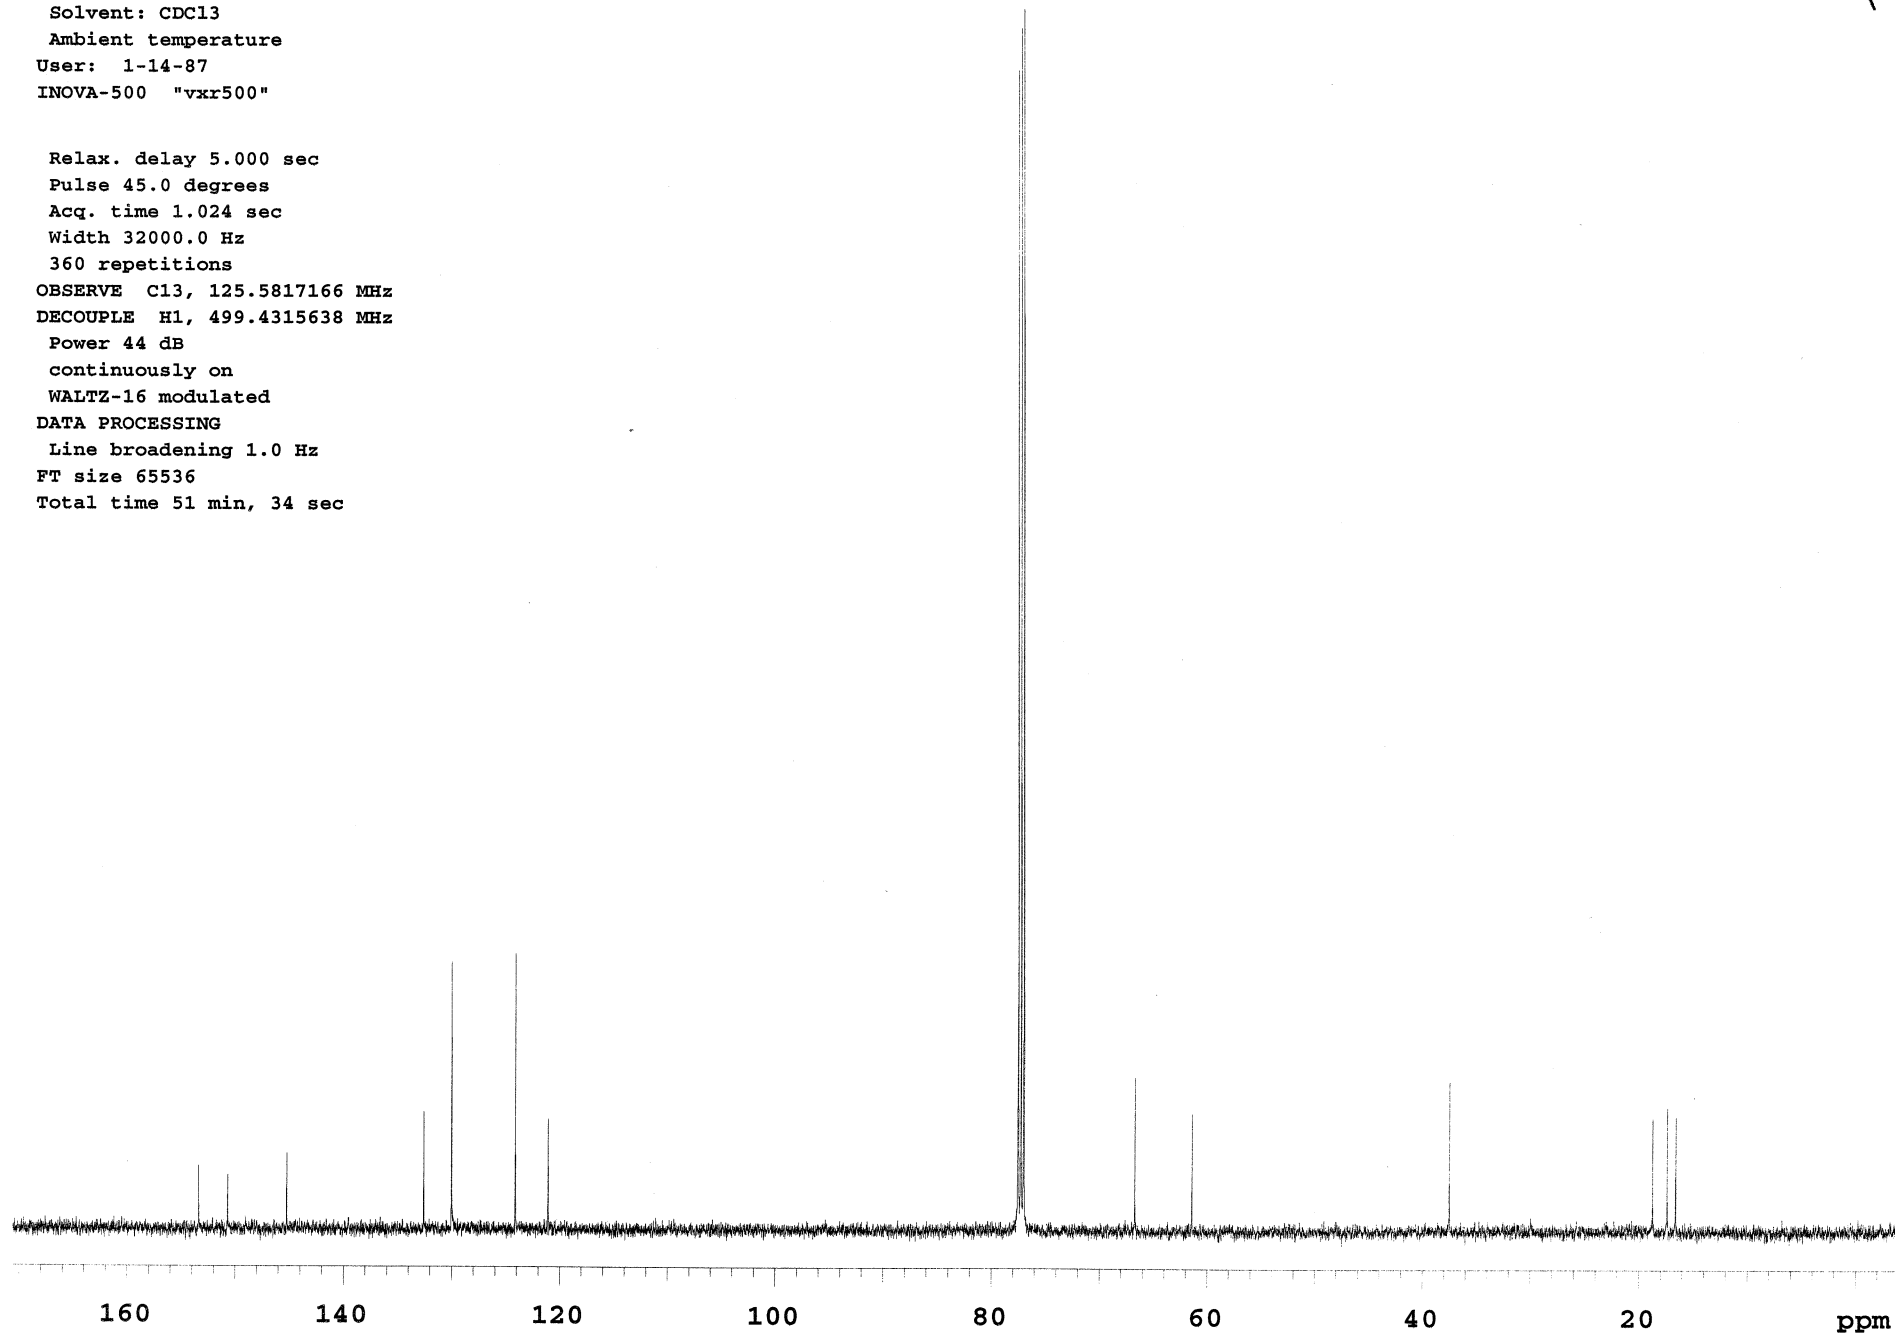

Pulse Sequence: s2pul

Solvent: CDCl<sub>3</sub>

Ambient temperature

File: tBuMe\_P\_anti

INOVA-500 "sunds1"

Relax. delay 5.000 sec

Pulse 47.8 degrees

Acq. time 4.665 sec

Width 7024.9 Hz

8 repetitions

OBSERVE H1, 499.6906568 MHz

DATA PROCESSING

Line broadening 0.3 Hz

FT size 65536

Total time 1 min, 17 sec

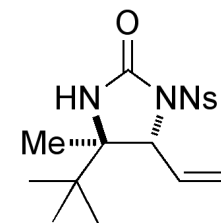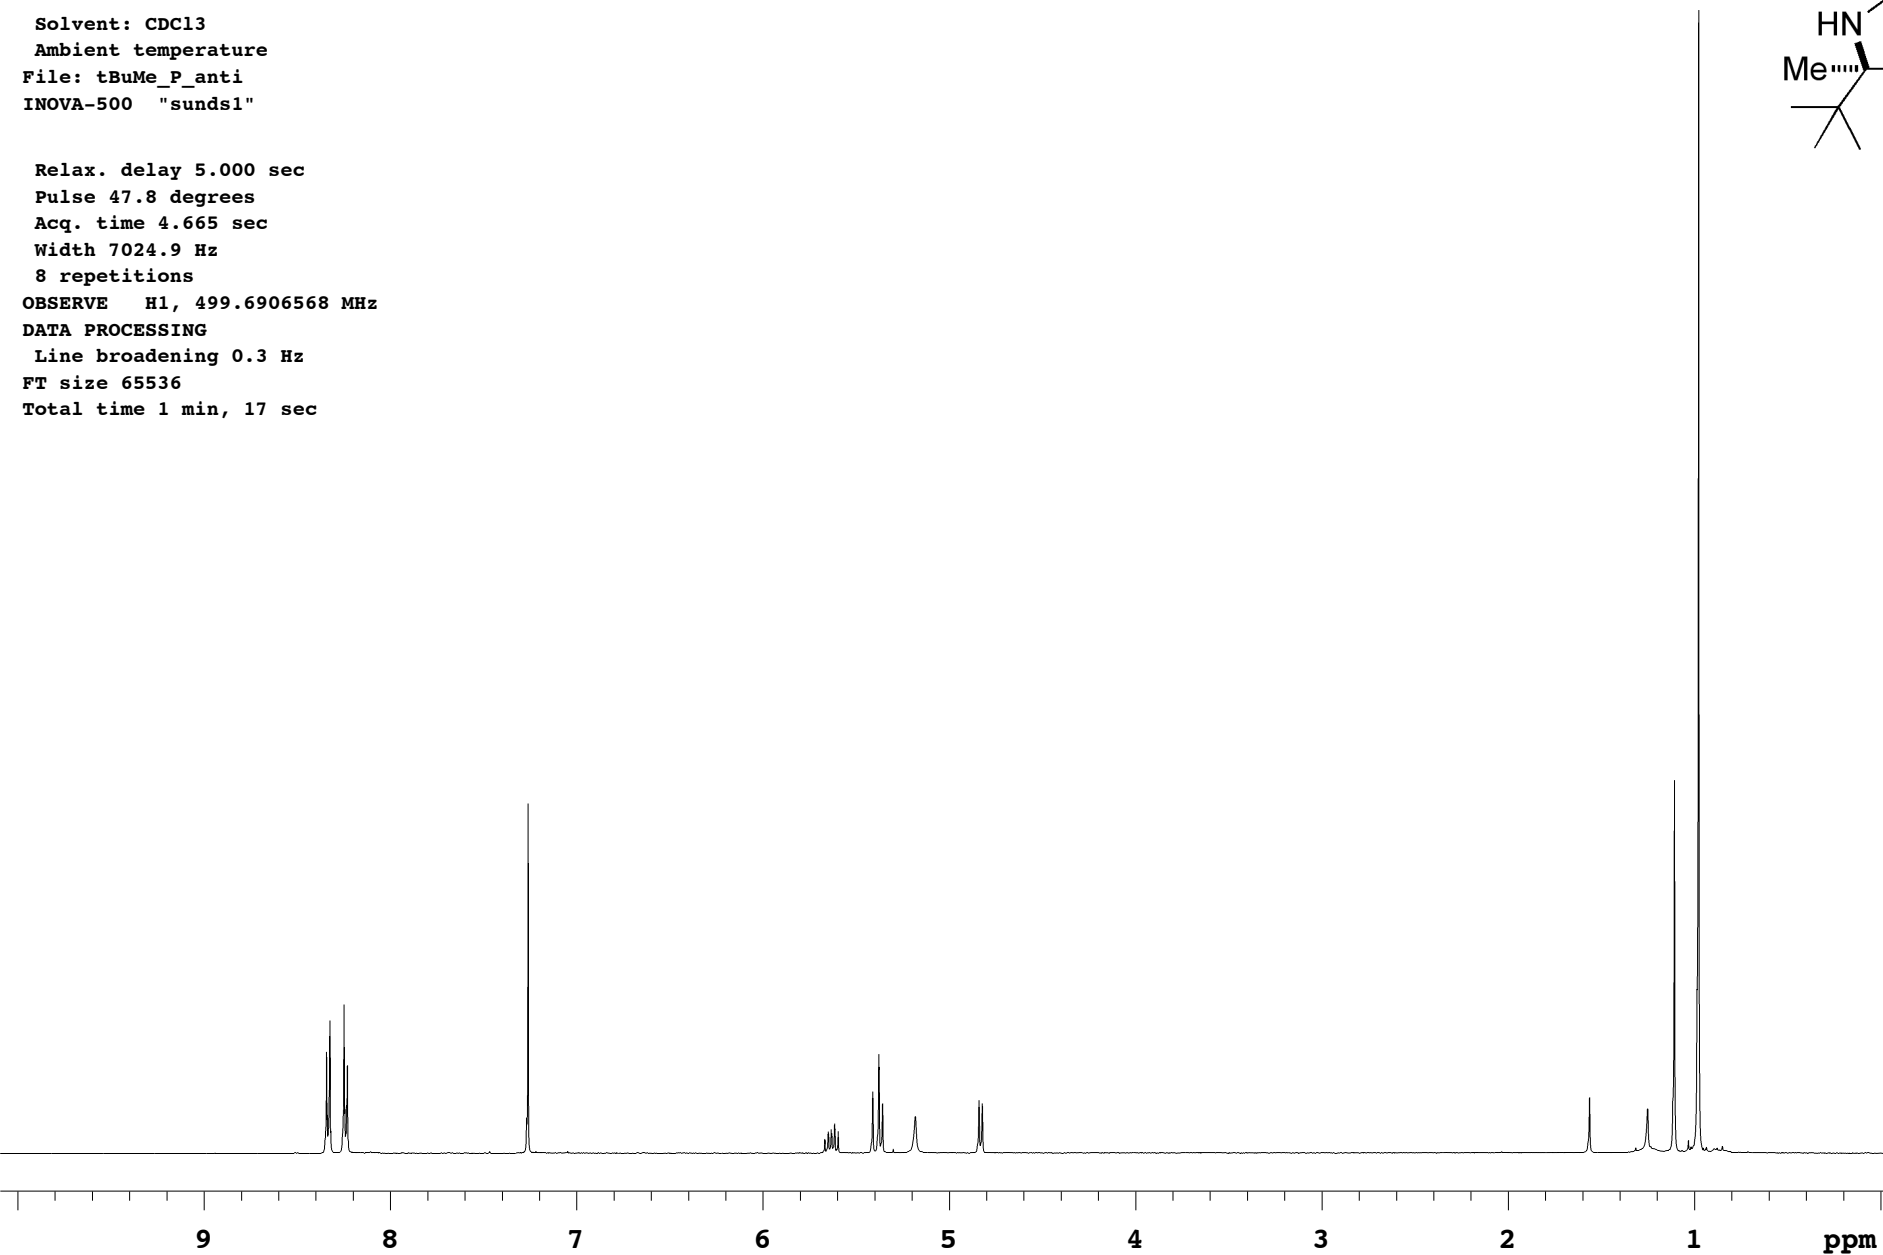



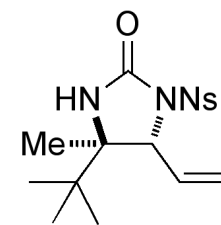

Pulse Sequence: s2pul

Solvent: CDCl<sub>3</sub>

Ambient temperature

User: 1-14-87

File: tBuMe\_P\_anti\_C13

INOVA-500 "sunds1"

Relax. delay 1.000 sec

Pulse 28.1 degrees

Acq. time 1.086 sec

Width 30165.9 Hz

914 repetitions

OBSERVE C13, 125.6472855 MHz

DECOUPLE H1, 499.6923275 MHz

Power 45 dB

continuously on

WALTZ-16 modulated

DATA PROCESSING

Line broadening 1.0 Hz

FT size 65536

Total time 3 hr, 43 min, 31 sec

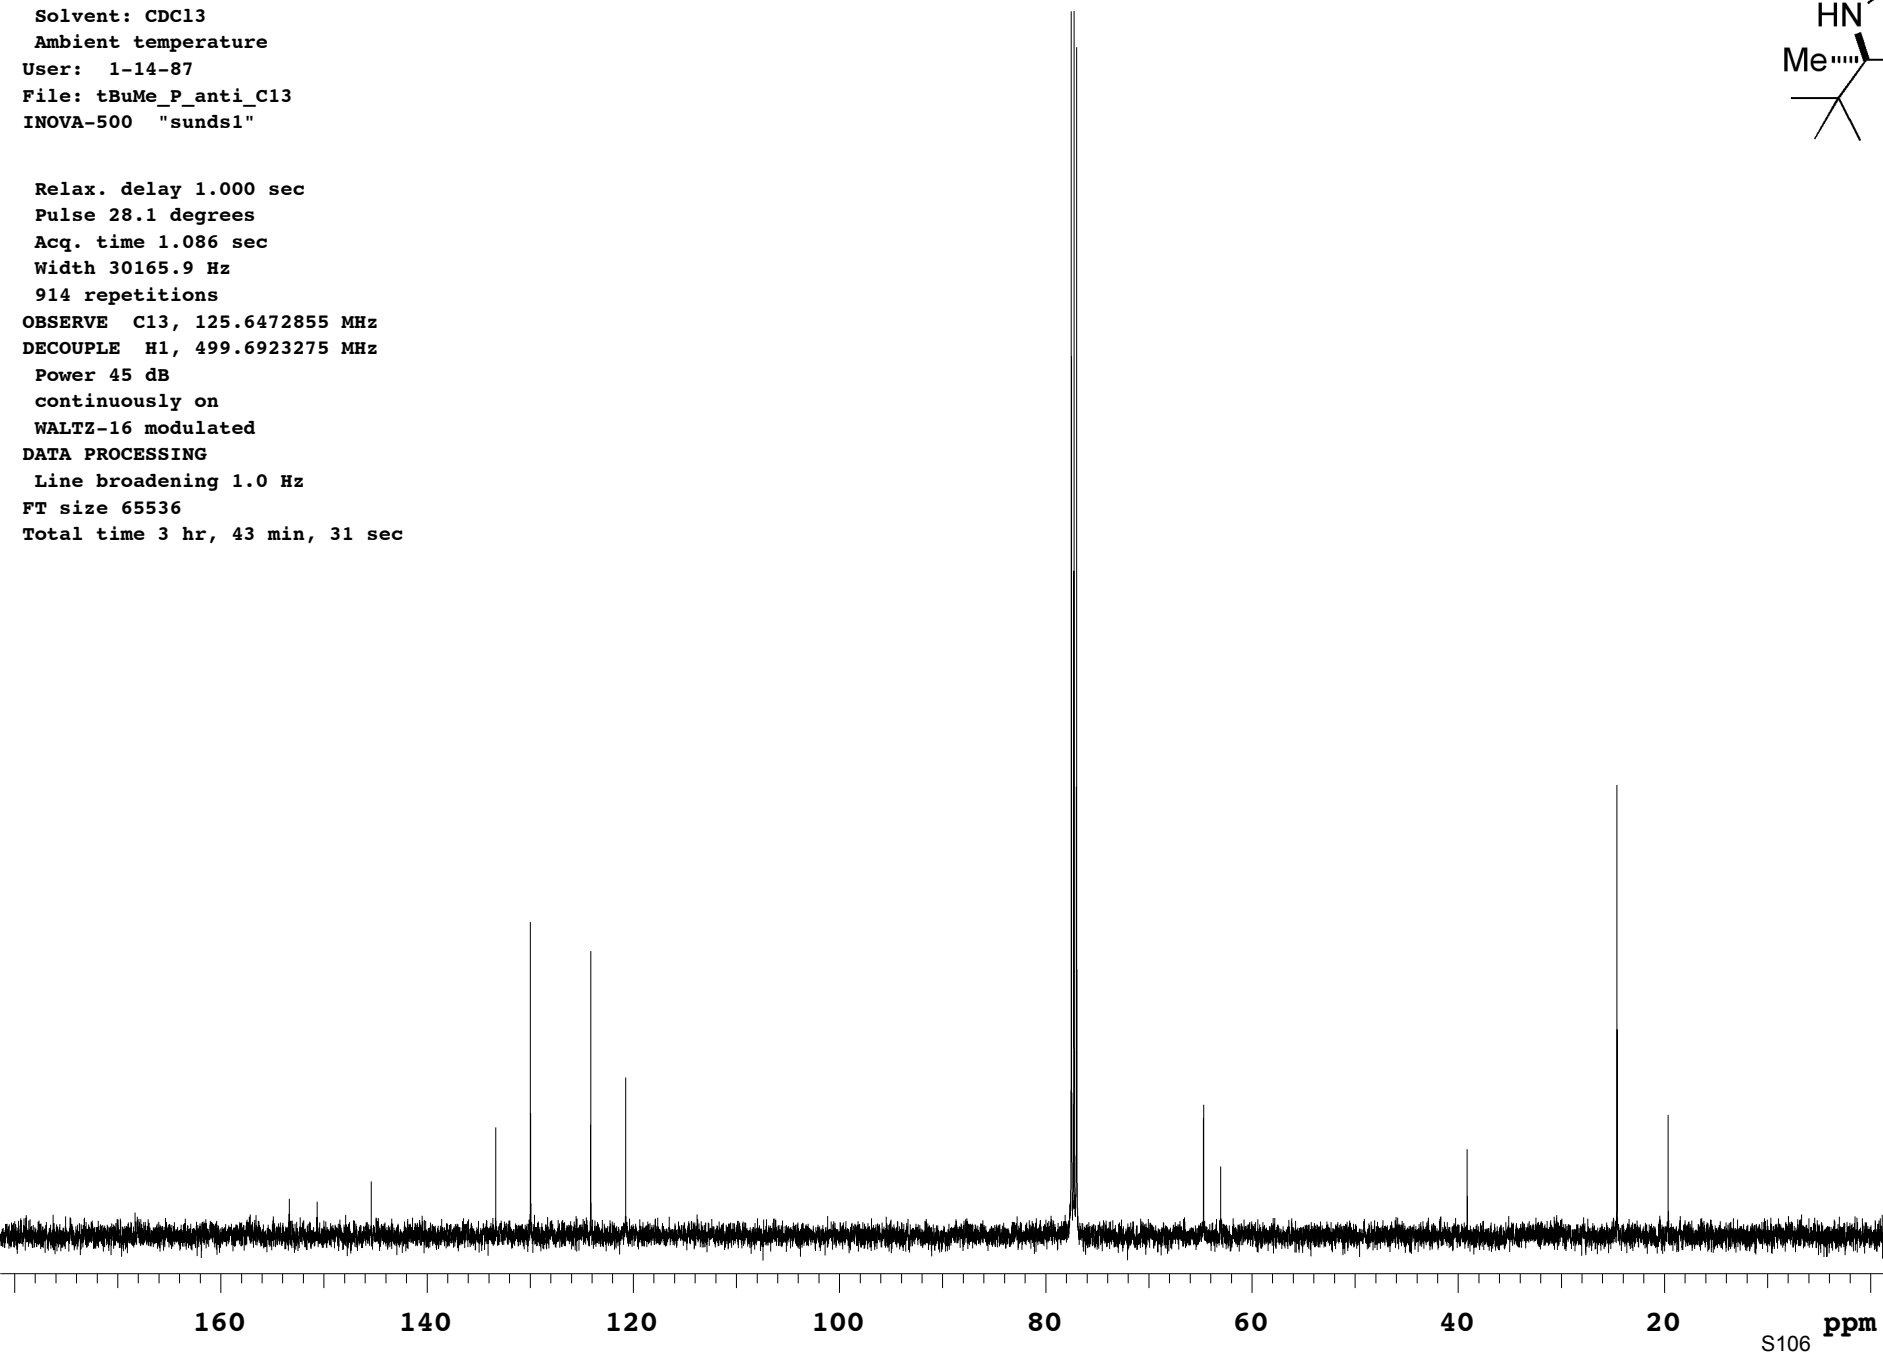

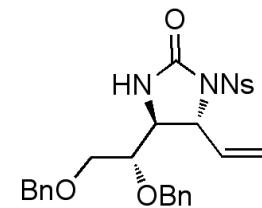

Pulse Sequence: s2pul

Solvent: CDCl3

Ambient temperature

File: OBn\_anti\_P

INOVA-500 "sunds1"

Relax. delay 5.000 sec

Pulse 90.0 degrees

Acq. time 4.096 sec

Width 8000.0 Hz

12 repetitions

OBSERVE H1, 500.0677753 MHz

DATA PROCESSING

Line broadening 0.3 Hz

FT size 65536

Total time 2 min, 25 sec

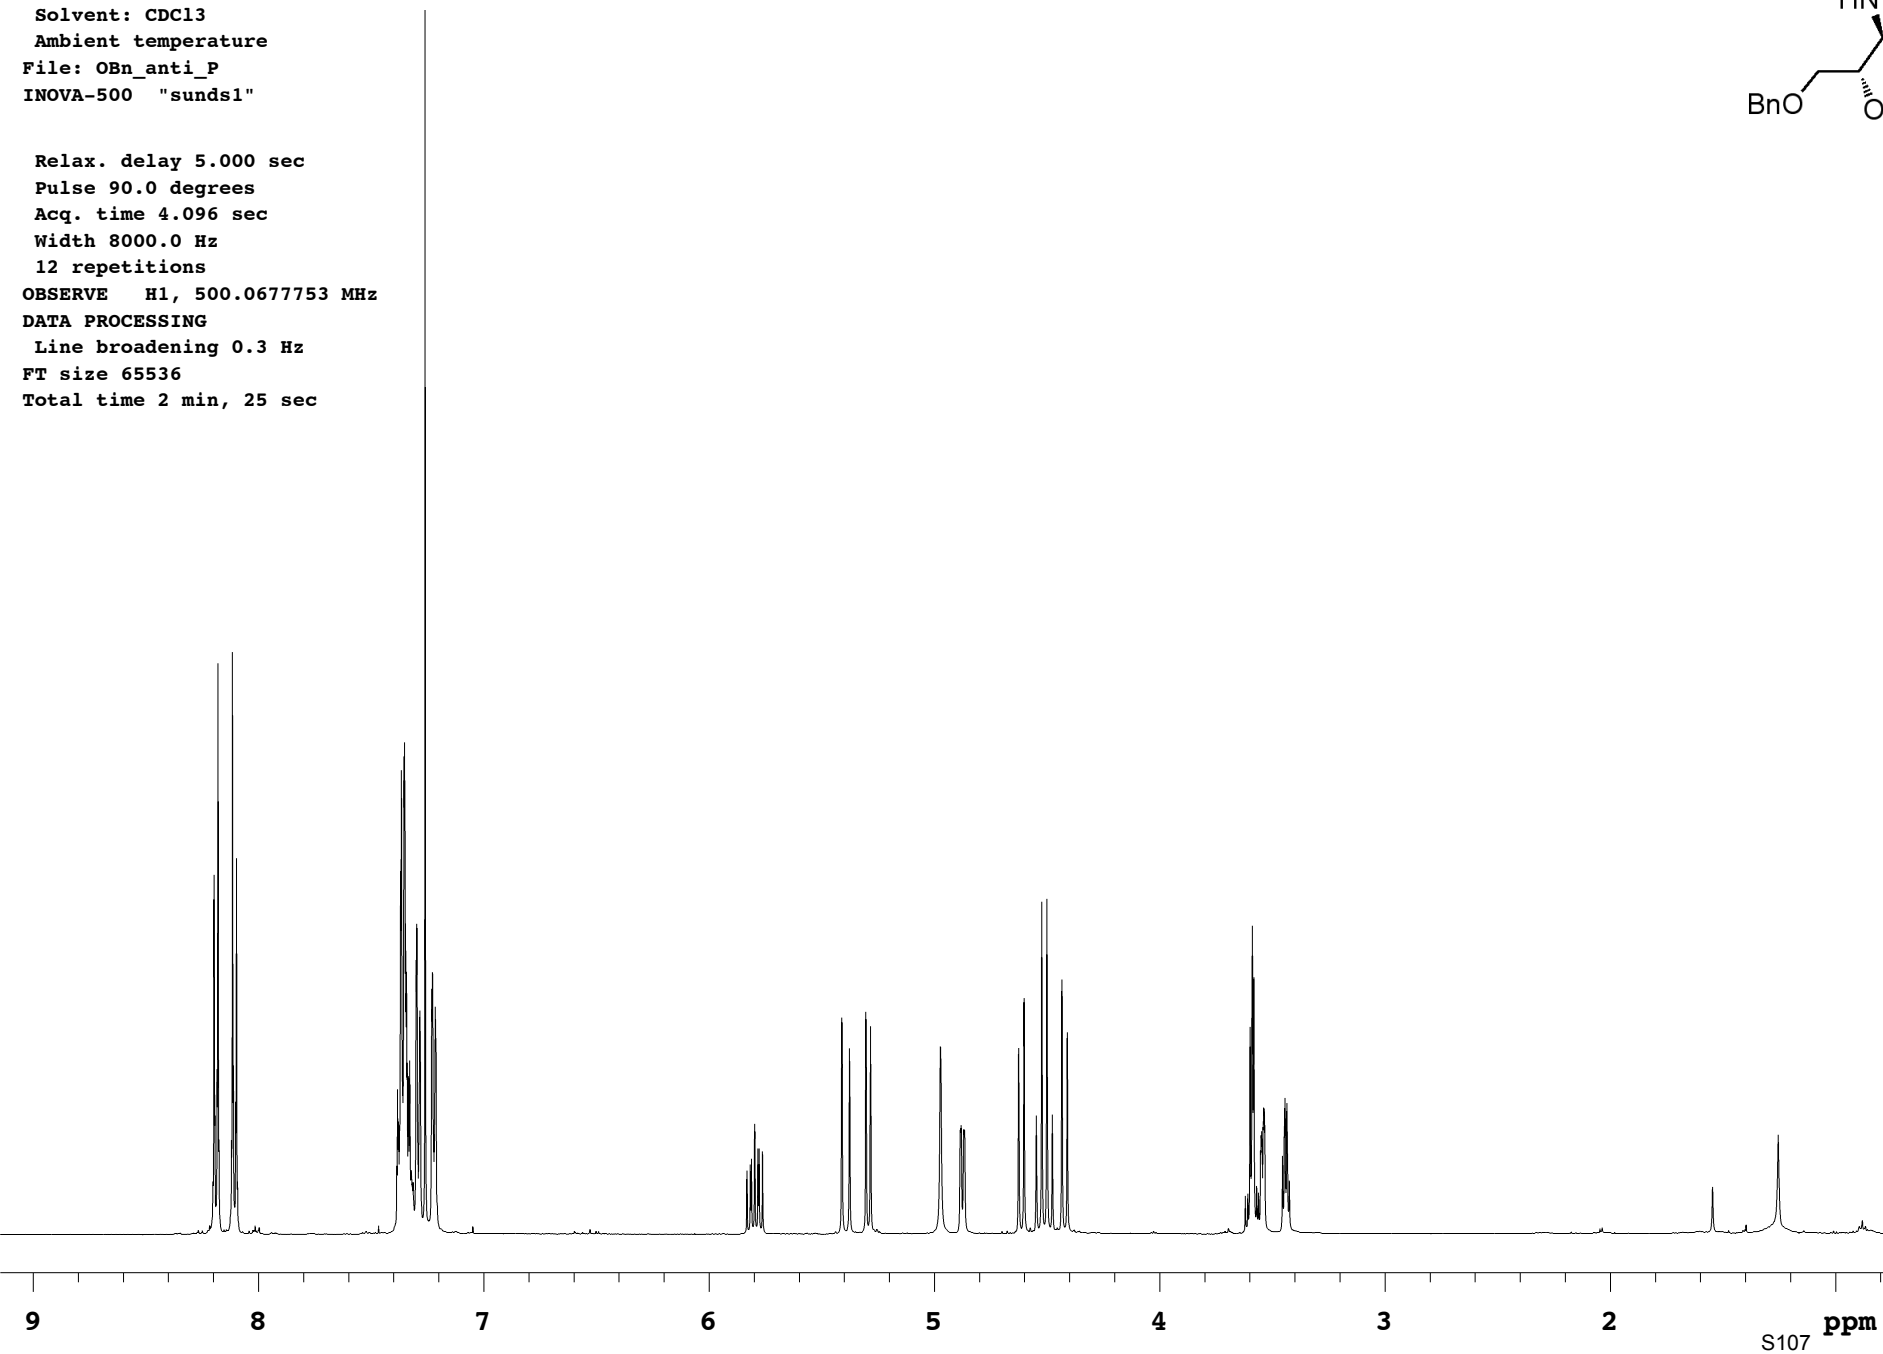

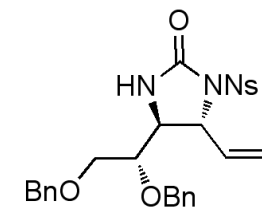

Pulse Sequence: s2pul

Solvent: CDCl3

Ambient temperature

User: 1-14-87

File: OBn\_anti\_P\_C

INOVA-500 "sunds1"

Relax. delay 5.000 sec

Pulse 65.9 degrees

Acq. time 1.086 sec

Width 30165.9 Hz

1200 repetitions

OBSERVE C13, 125.6472855 MHz

DECOUPLE H1, 499.6923275 MHz

Power 44 dB

continuously on

WALTZ-16 modulated

DATA PROCESSING

Line broadening 1.0 Hz

FT size 65536

Total time 4 hr, 14 min, 4 sec

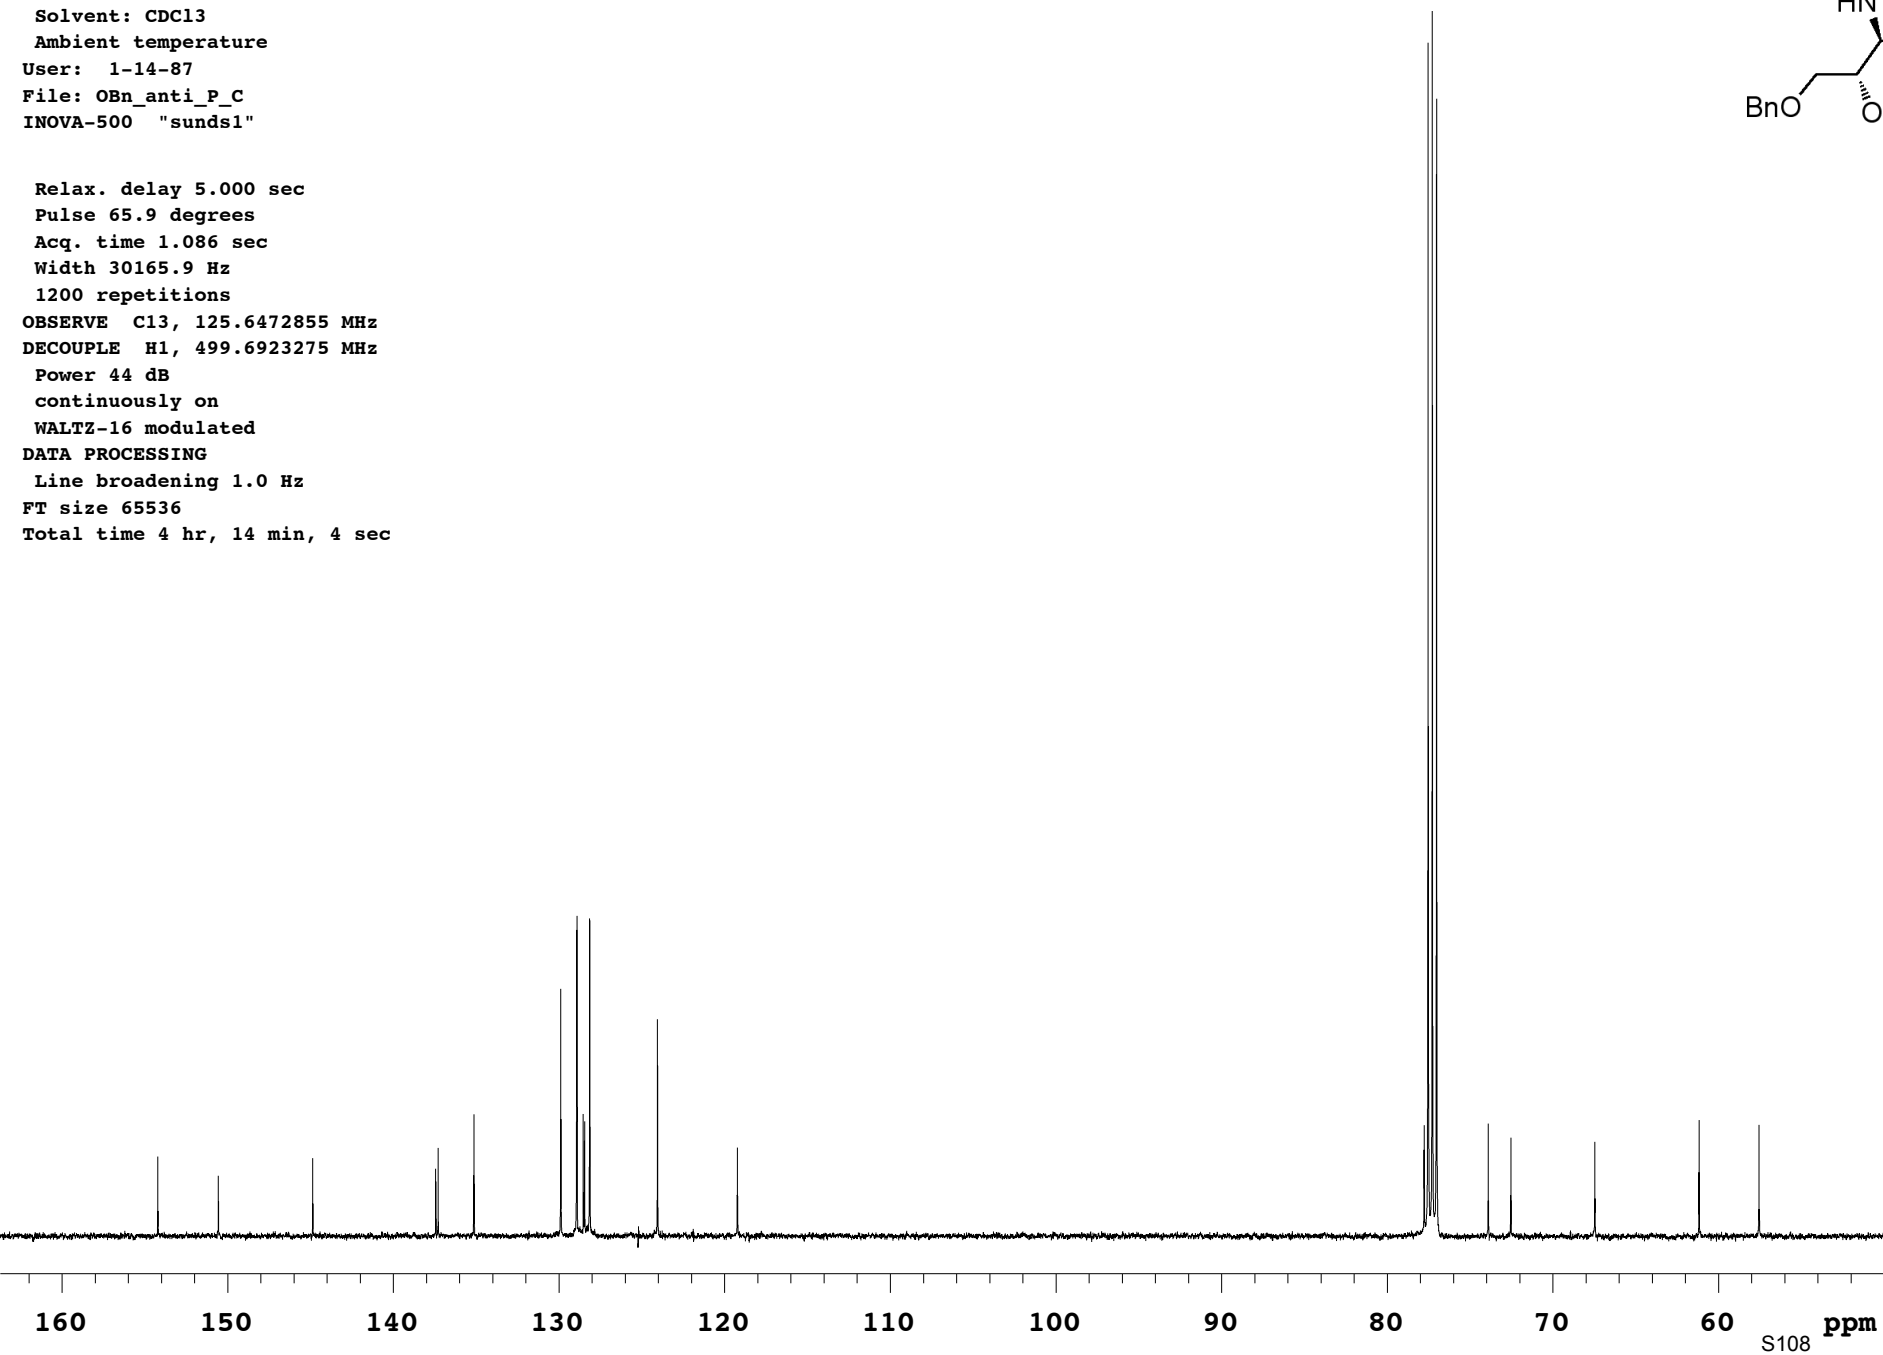

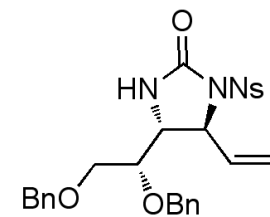

Pulse Sequence: s2pul

Solvent: CDCl<sub>3</sub>

Ambient temperature

File: OBn\_syn\_P

INOVA-500 "sunds1"

Relax. delay 5.000 sec

Pulse 90.0 degrees

Acq. time 4.096 sec

Width 8000.0 Hz

12 repetitions

OBSERVE H1, 500.0677755 MHz

DATA PROCESSING

Line broadening 0.3 Hz

FT size 65536

Total time 2 min, 25 sec

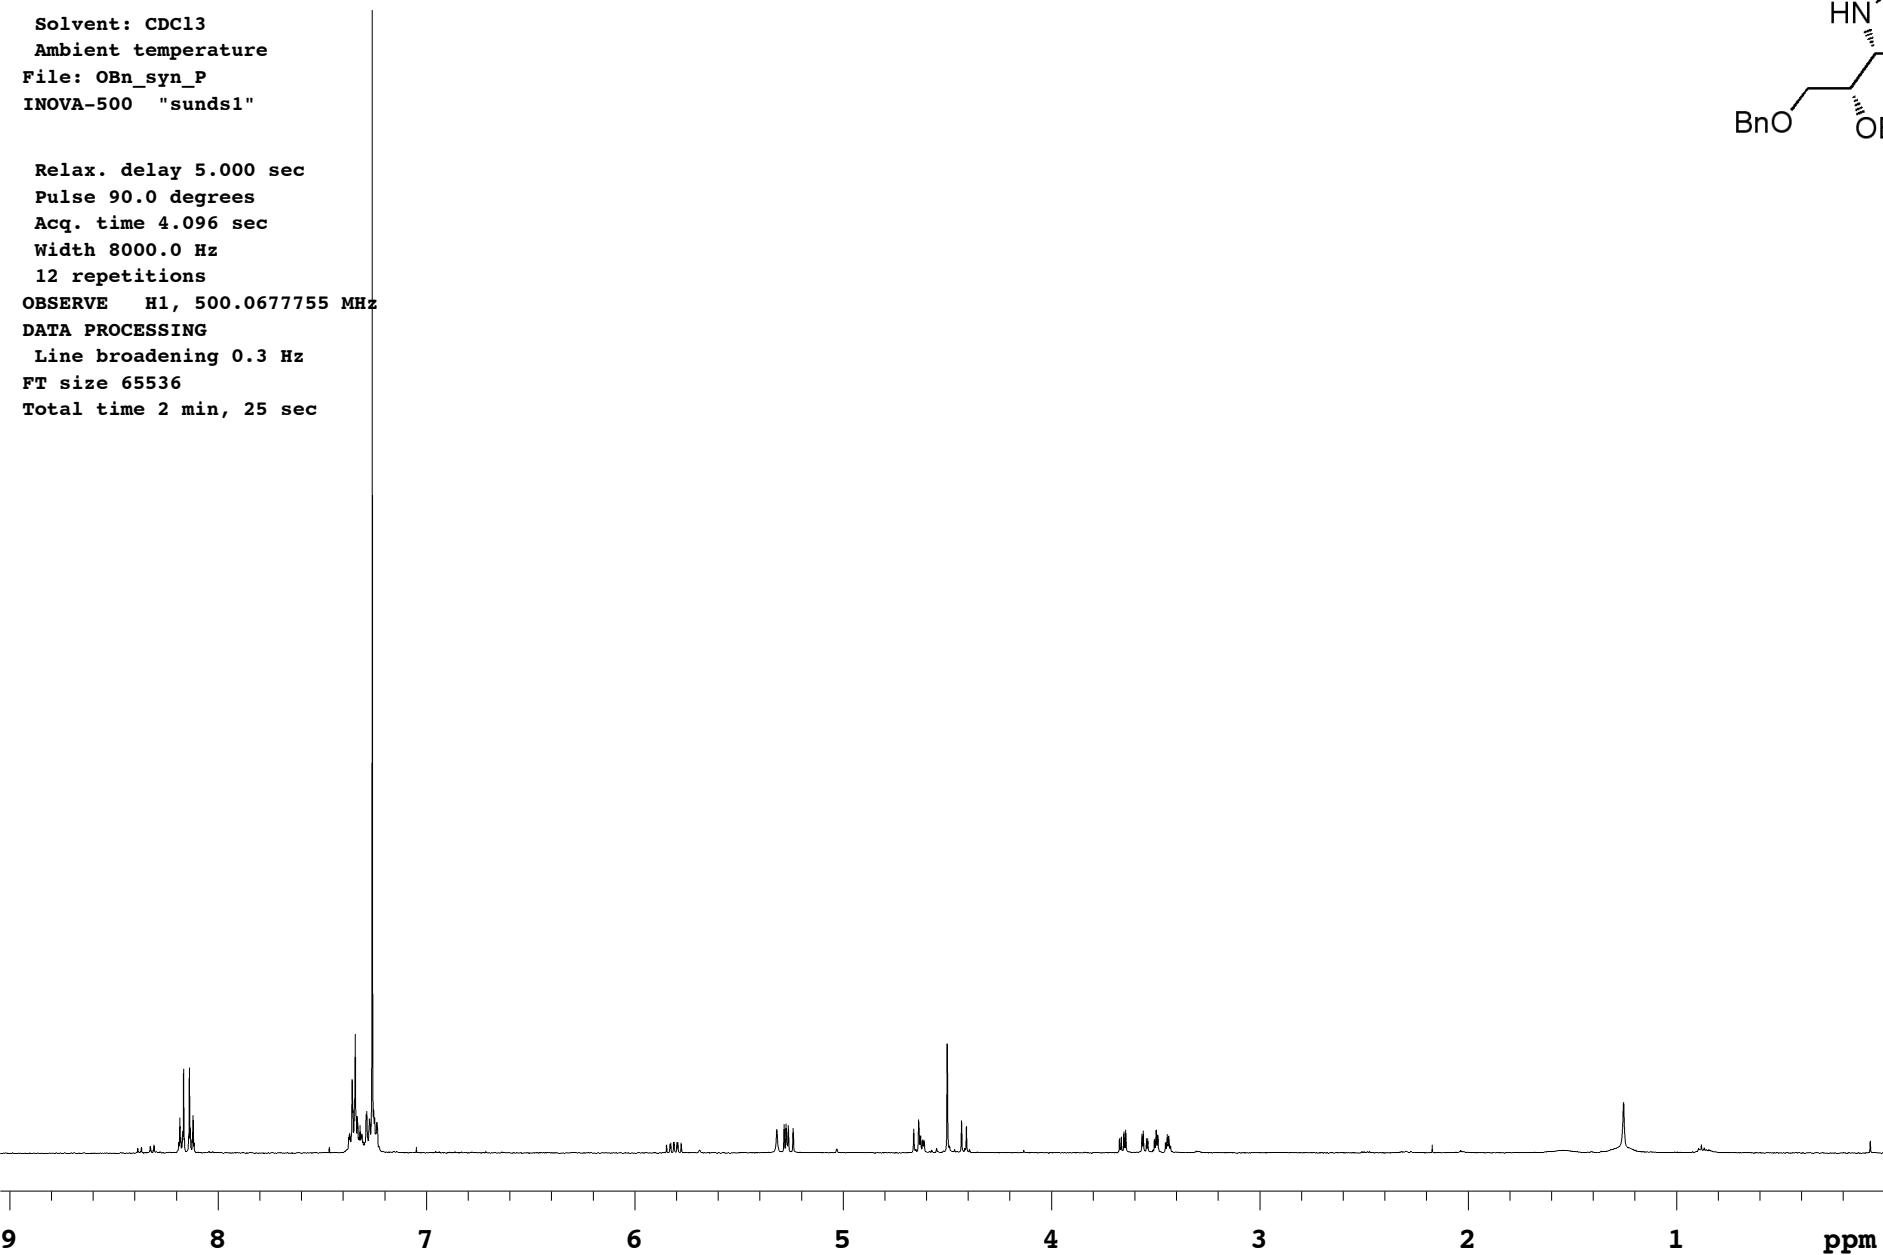

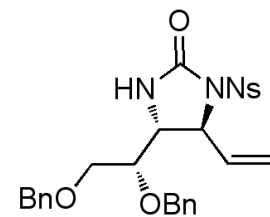

Pulse Sequence: s2pul

Solvent: CDCl<sub>3</sub>

Ambient temperature

User: 1-14-87

File: OBn\_syn\_P\_C

INOVA-500 "sunds1"

Relax. delay 5.000 sec

Pulse 45.0 degrees

Acq. time 1.024 sec

Width 32000.0 Hz

1014 repetitions

OBSERVE C13, 125.5817166 MHz

DECOUPLE H1, 499.4315638 MHz

Power 48 dB

continuously on

WALTZ-16 modulated

DATA PROCESSING

Line broadening 1.0 Hz

FT size 65536

Total time 2 hr, 30 min, 55 sec

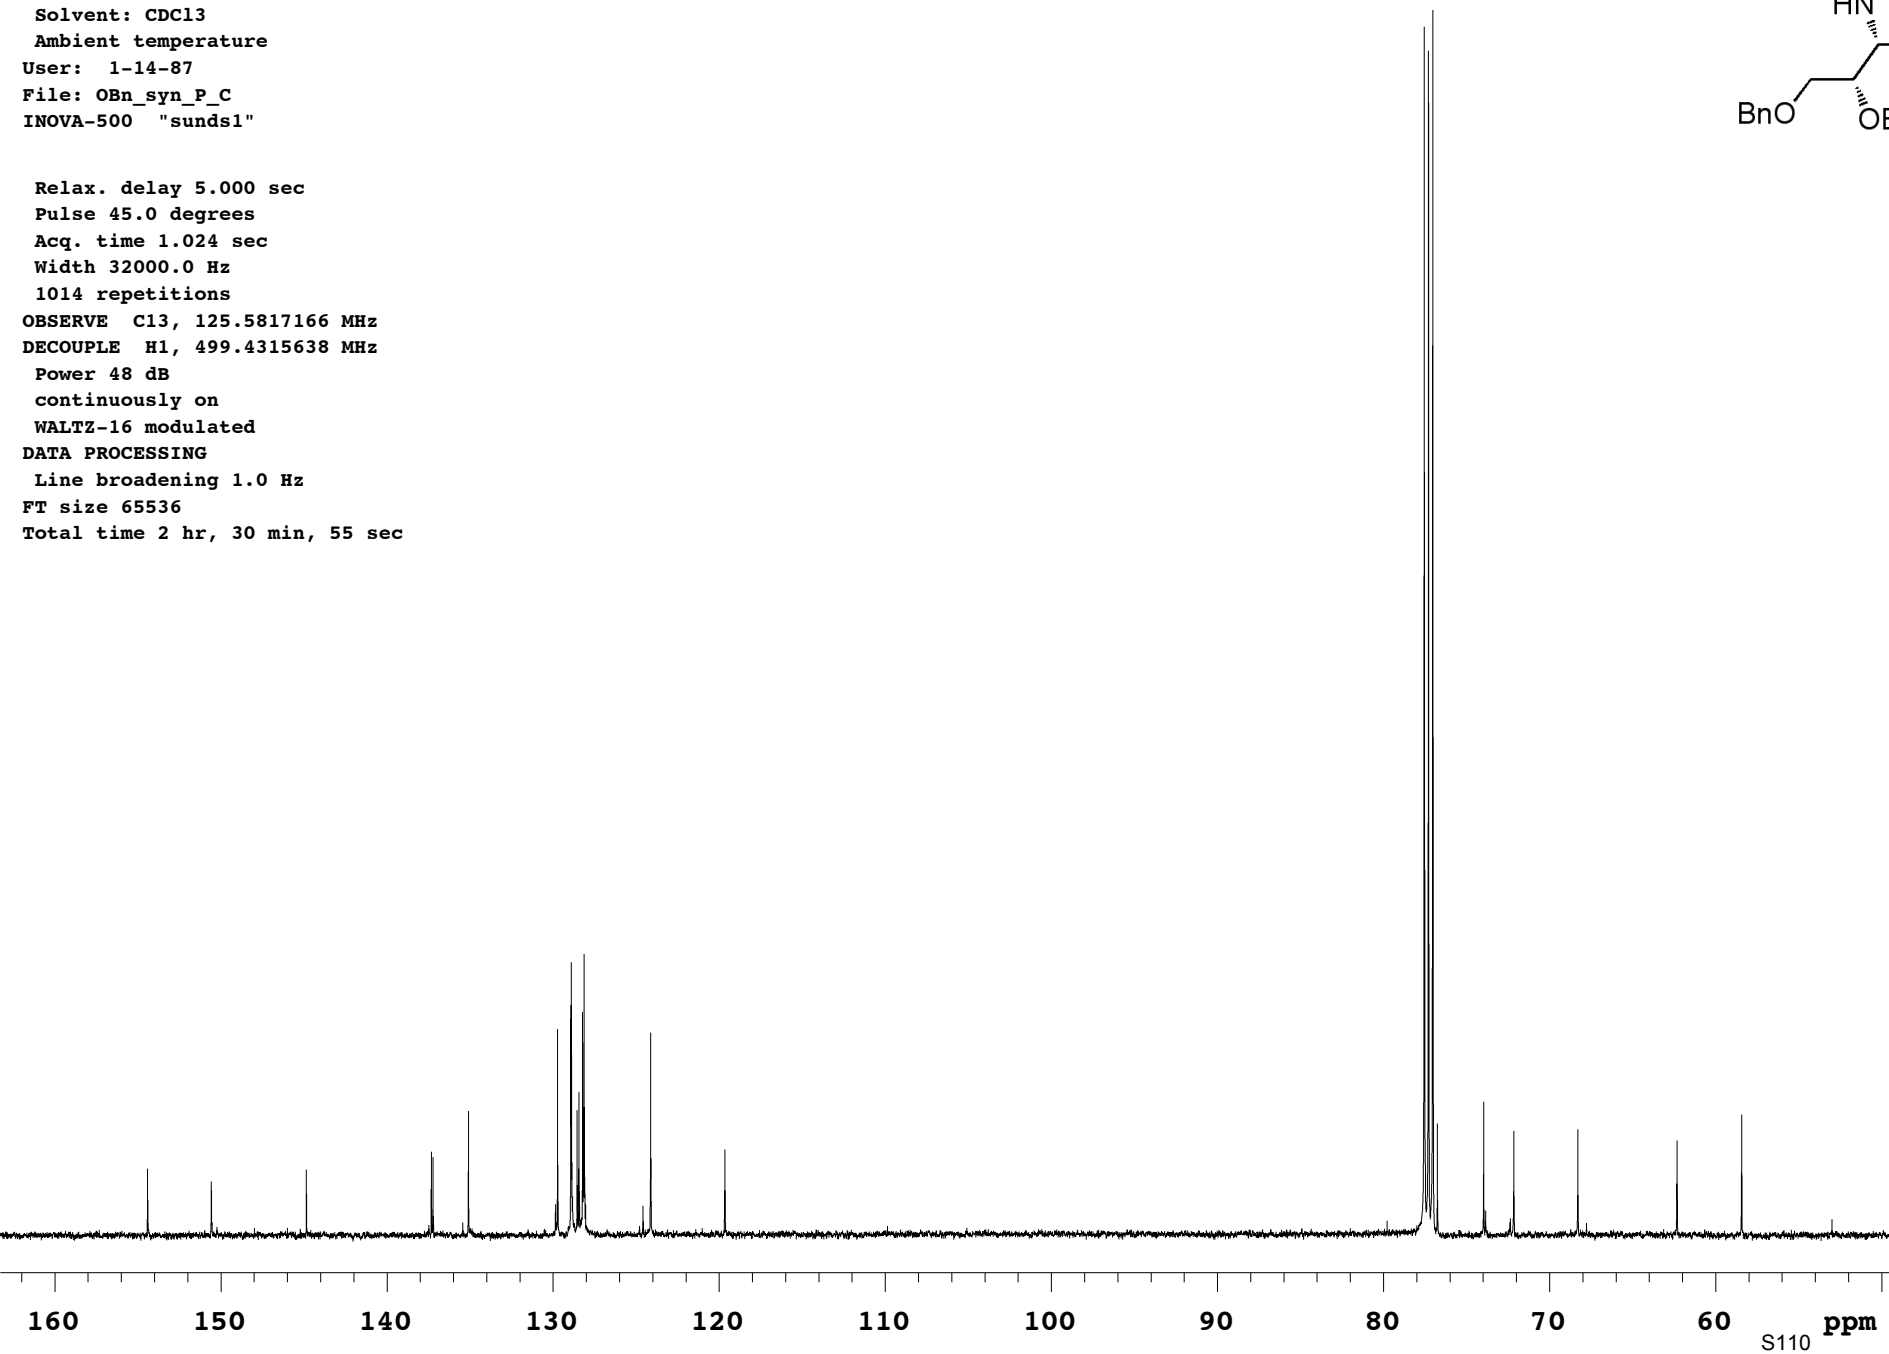

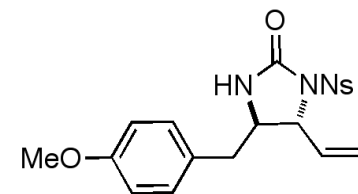

Pulse Sequence: s2pul

Solvent: CDC13

Ambient temperature

File: OMe\_P

INOVA-500 "sunds1"

Relax. delay 5.000 sec

Pulse 90.0 degrees

Acq. time 4.096 sec

Width 8000.0 Hz

10 repetitions

OBSERVE H1, 500.0677755 MHz

DATA PROCESSING

Line broadening 0.3 Hz

FT size 65536

Total time 2 min, 25 sec

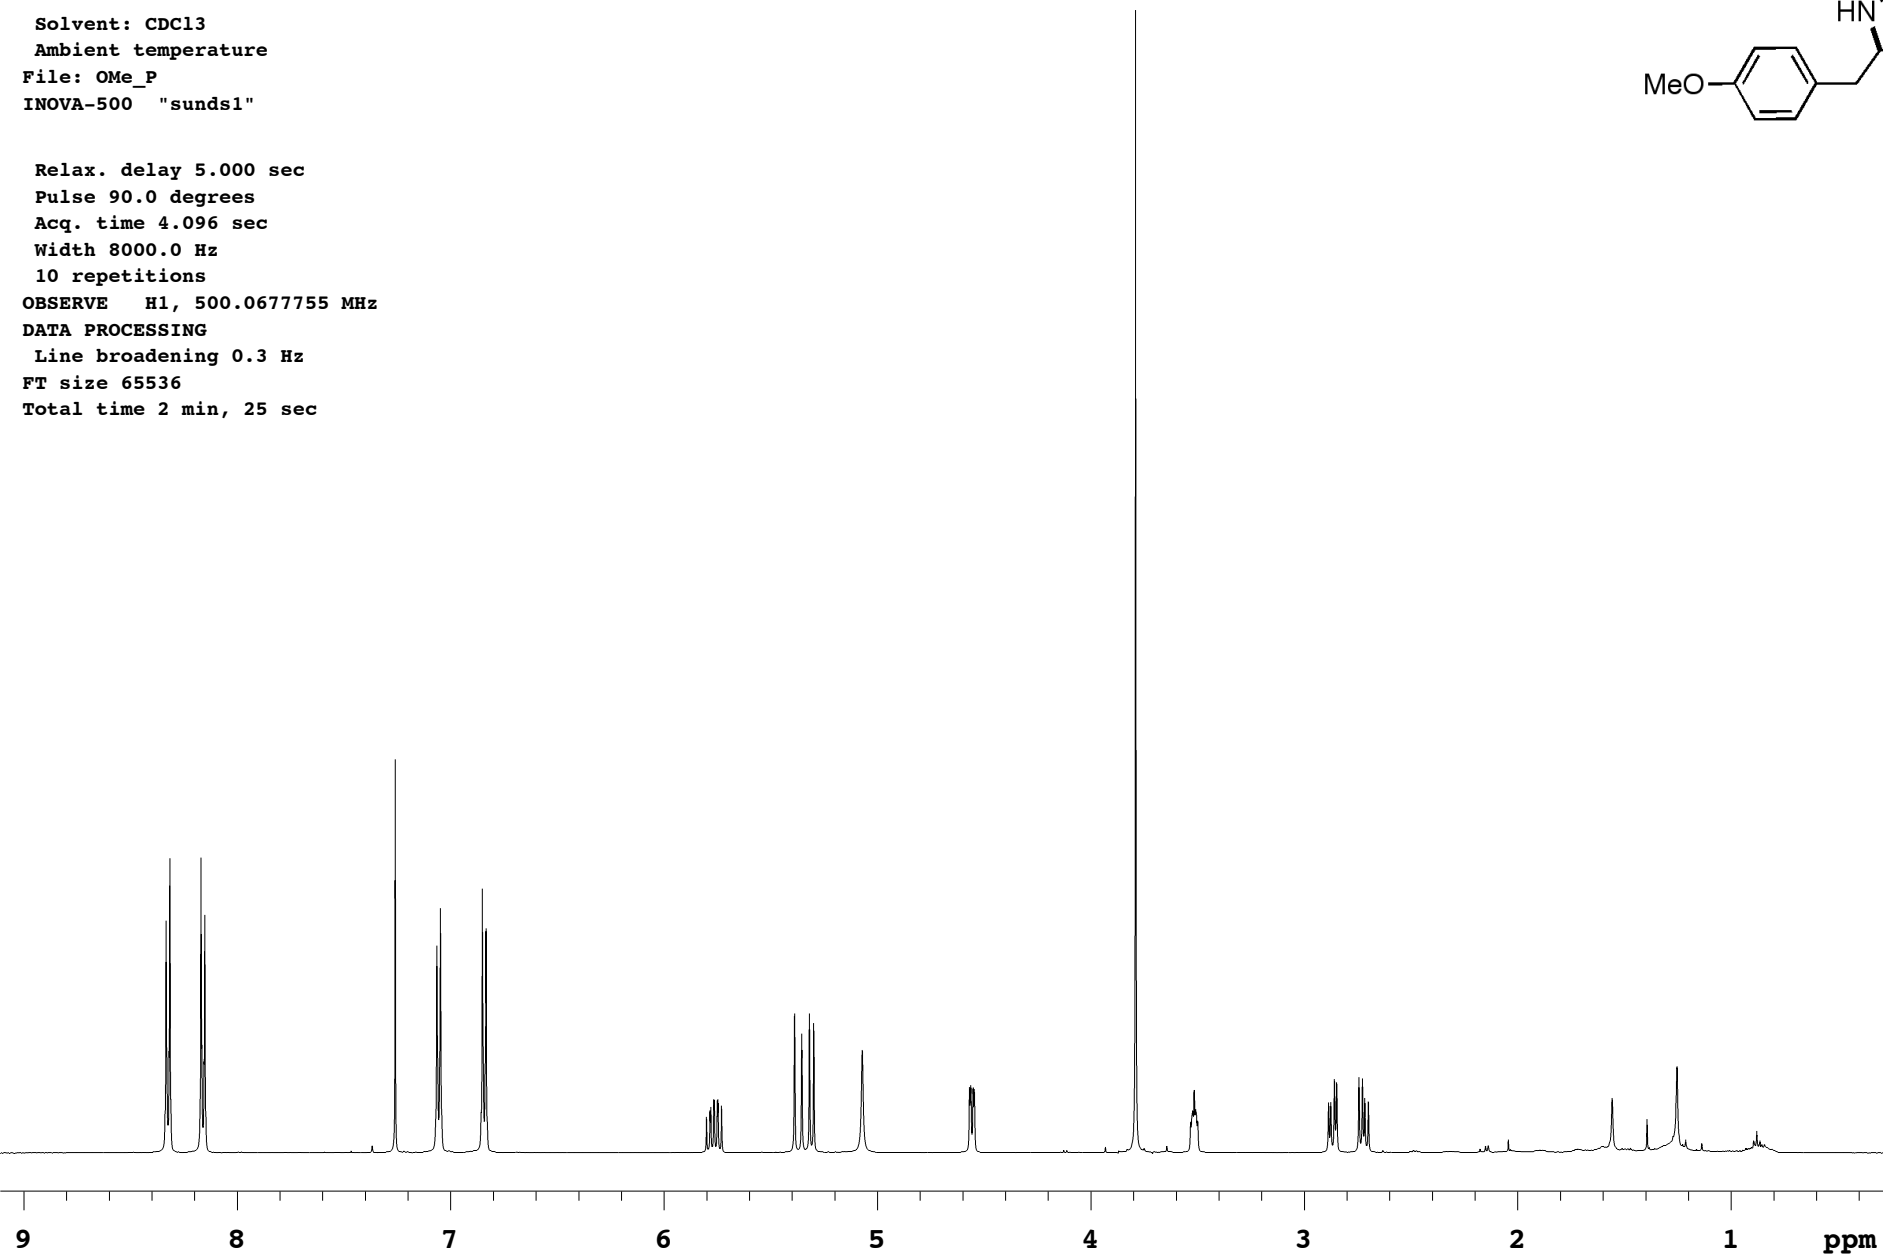

Pulse Sequence: s2pul

Solvent: CDCl<sub>3</sub>

Ambient temperature

User: 1-14-87

File: OMe\_P\_C13

INOVA-500 "sunds1"

Relax. delay 5.000 sec

Pulse 45.0 degrees

Acq. time 1.024 sec

Width 32000.0 Hz

974 repetitions

OBSERVE C13, 125.5817166 MHz

DECOUPLE H1, 499.4315638 MHz

Power 49 dB

continuously on

WALTZ-16 modulated

DATA PROCESSING

Line broadening 1.0 Hz

FT size 65536

Total time 5 hr, 1 min, 44 sec

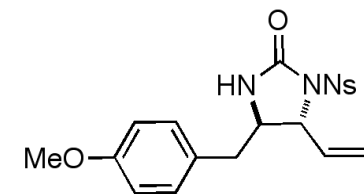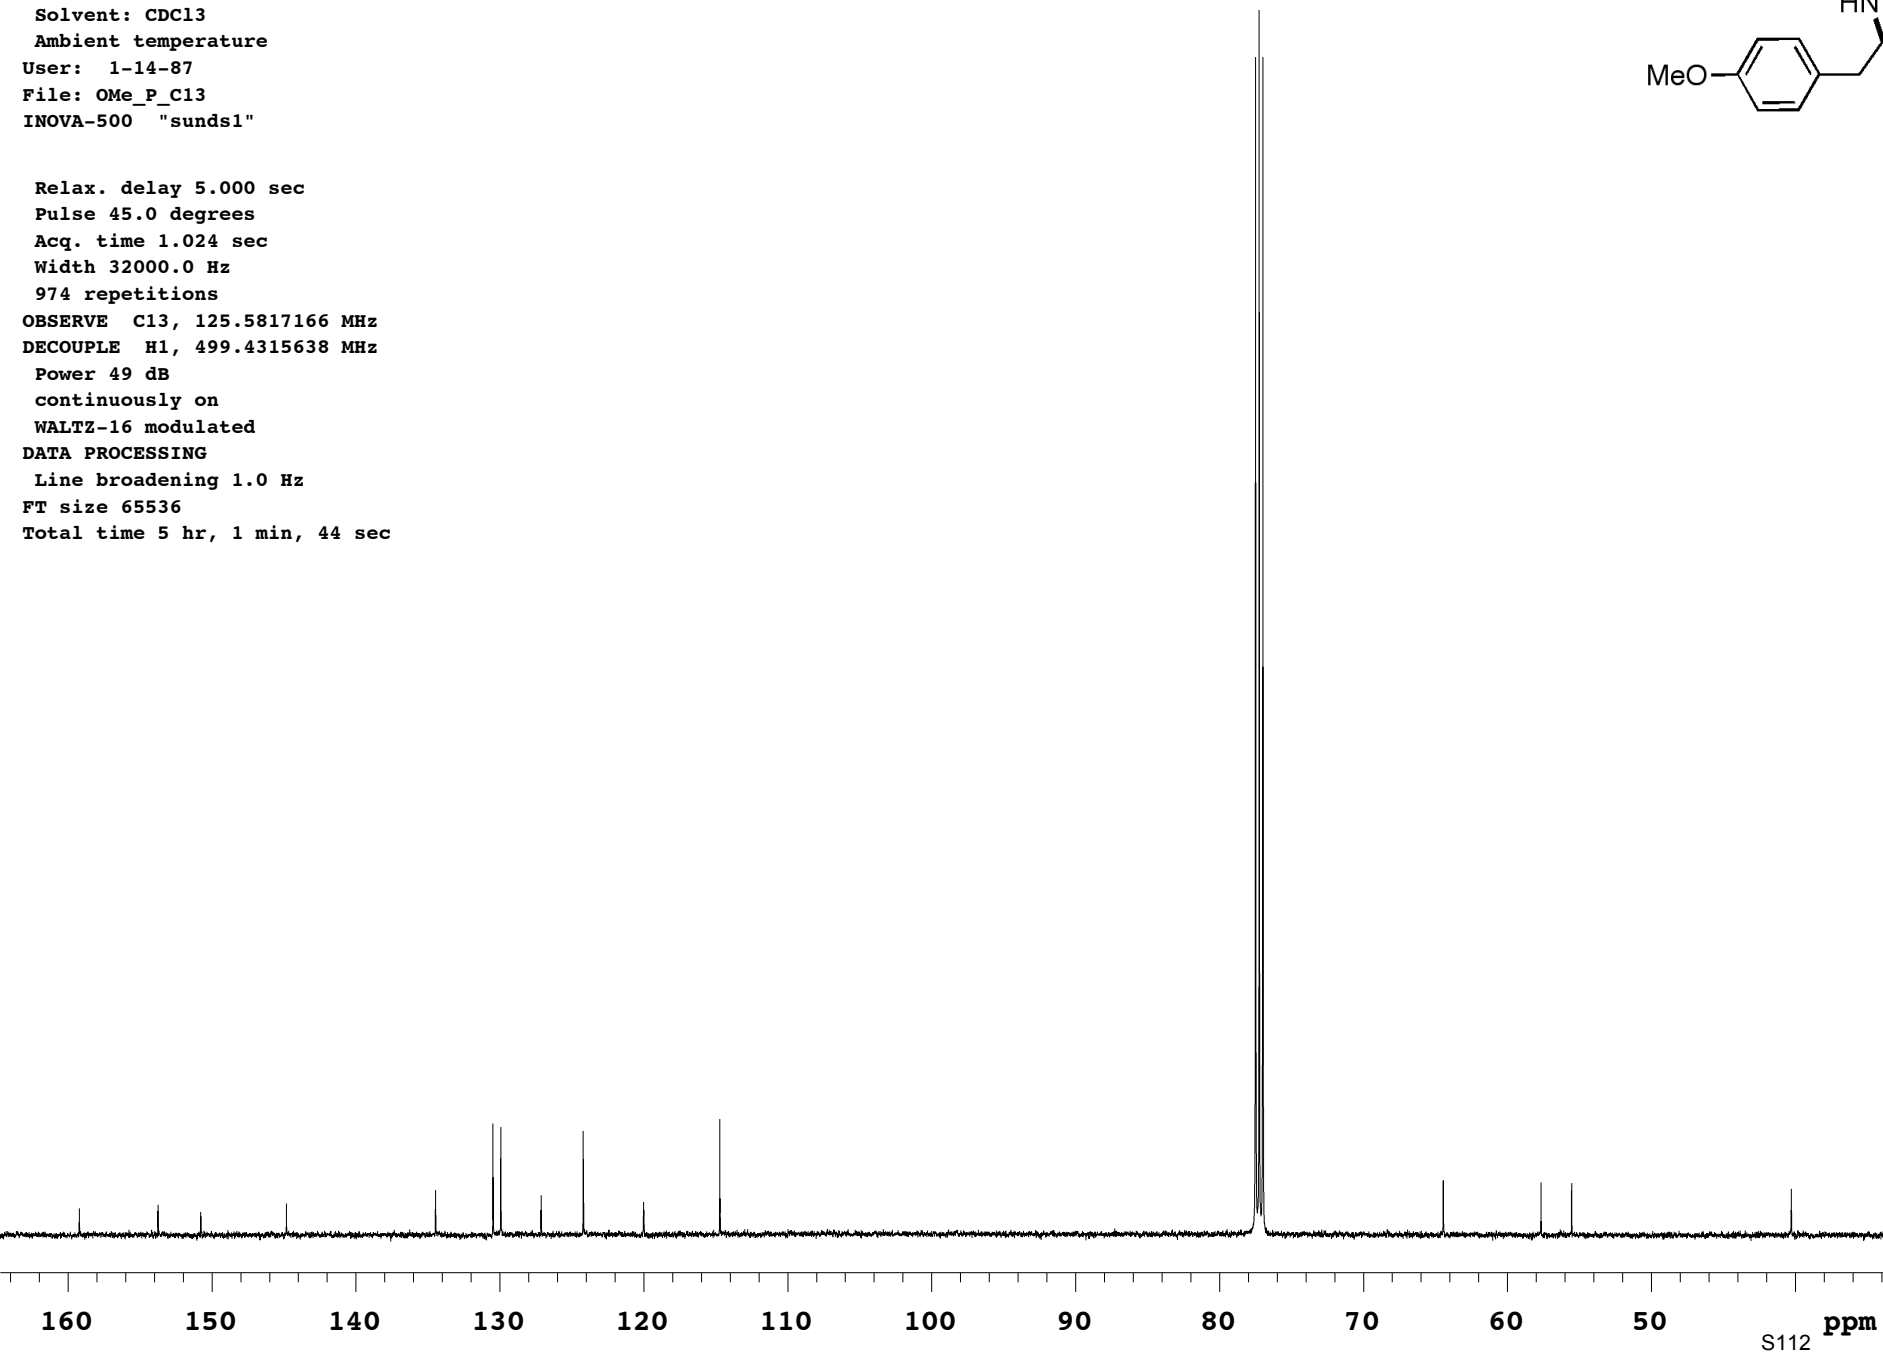

## Strambeanu and White

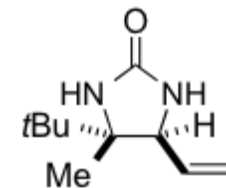

Pulse Sequence: s2pul

Solvent: CDCl3

Ambient temperature

INOVA-500 "ui500nb"

Relax. delay 5.000 sec

Pulse 90.0 degrees

Acq. time 4.096 sec

Width 8000.0 Hz

6 repetitions

OBSERVE H1, 500.0677750 MHz

DATA PROCESSING

Line broadening 0.3 Hz

FT size 65536

Total time 1 min, 12 sec

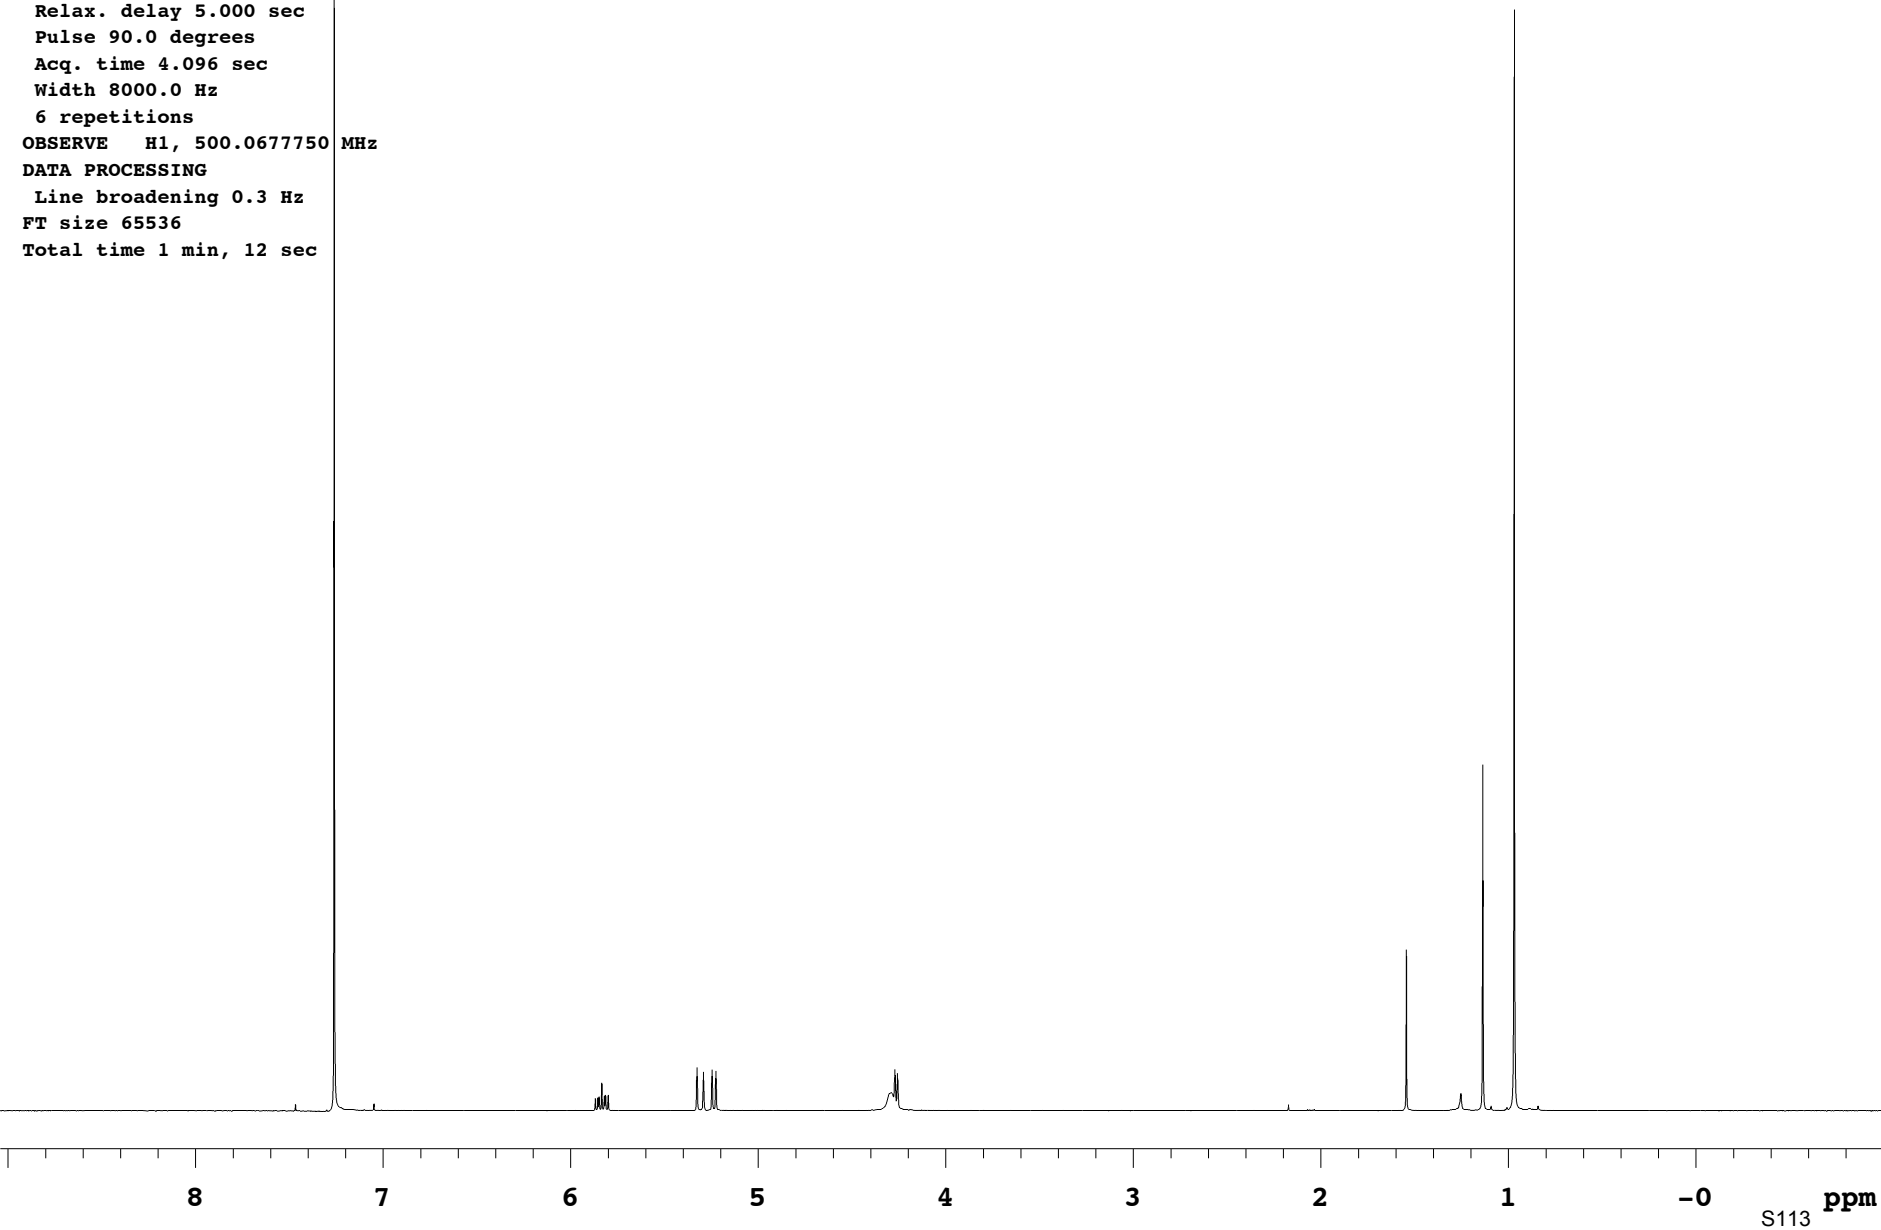



## Strambeanu and White

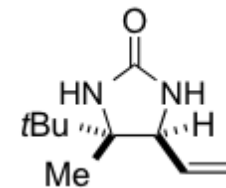

Pulse Sequence: s2pul

Solvent: CDCl<sub>3</sub>

Ambient temperature

User: 1-14-87

INOVA-500 "vxr500"

Relax. delay 5.000 sec

Pulse 45.0 degrees

Acq. time 1.024 sec

Width 32000.0 Hz

348 repetitions

OBSERVE C13, 125.5817483 MHz

DECOUPLE H1, 499.4315638 MHz

Power 47 dB

continuously on

WALTZ-16 modulated

DATA PROCESSING

Line broadening 1.0 Hz

FT size 65536

Total time 2 hr, 8 min, 48 sec

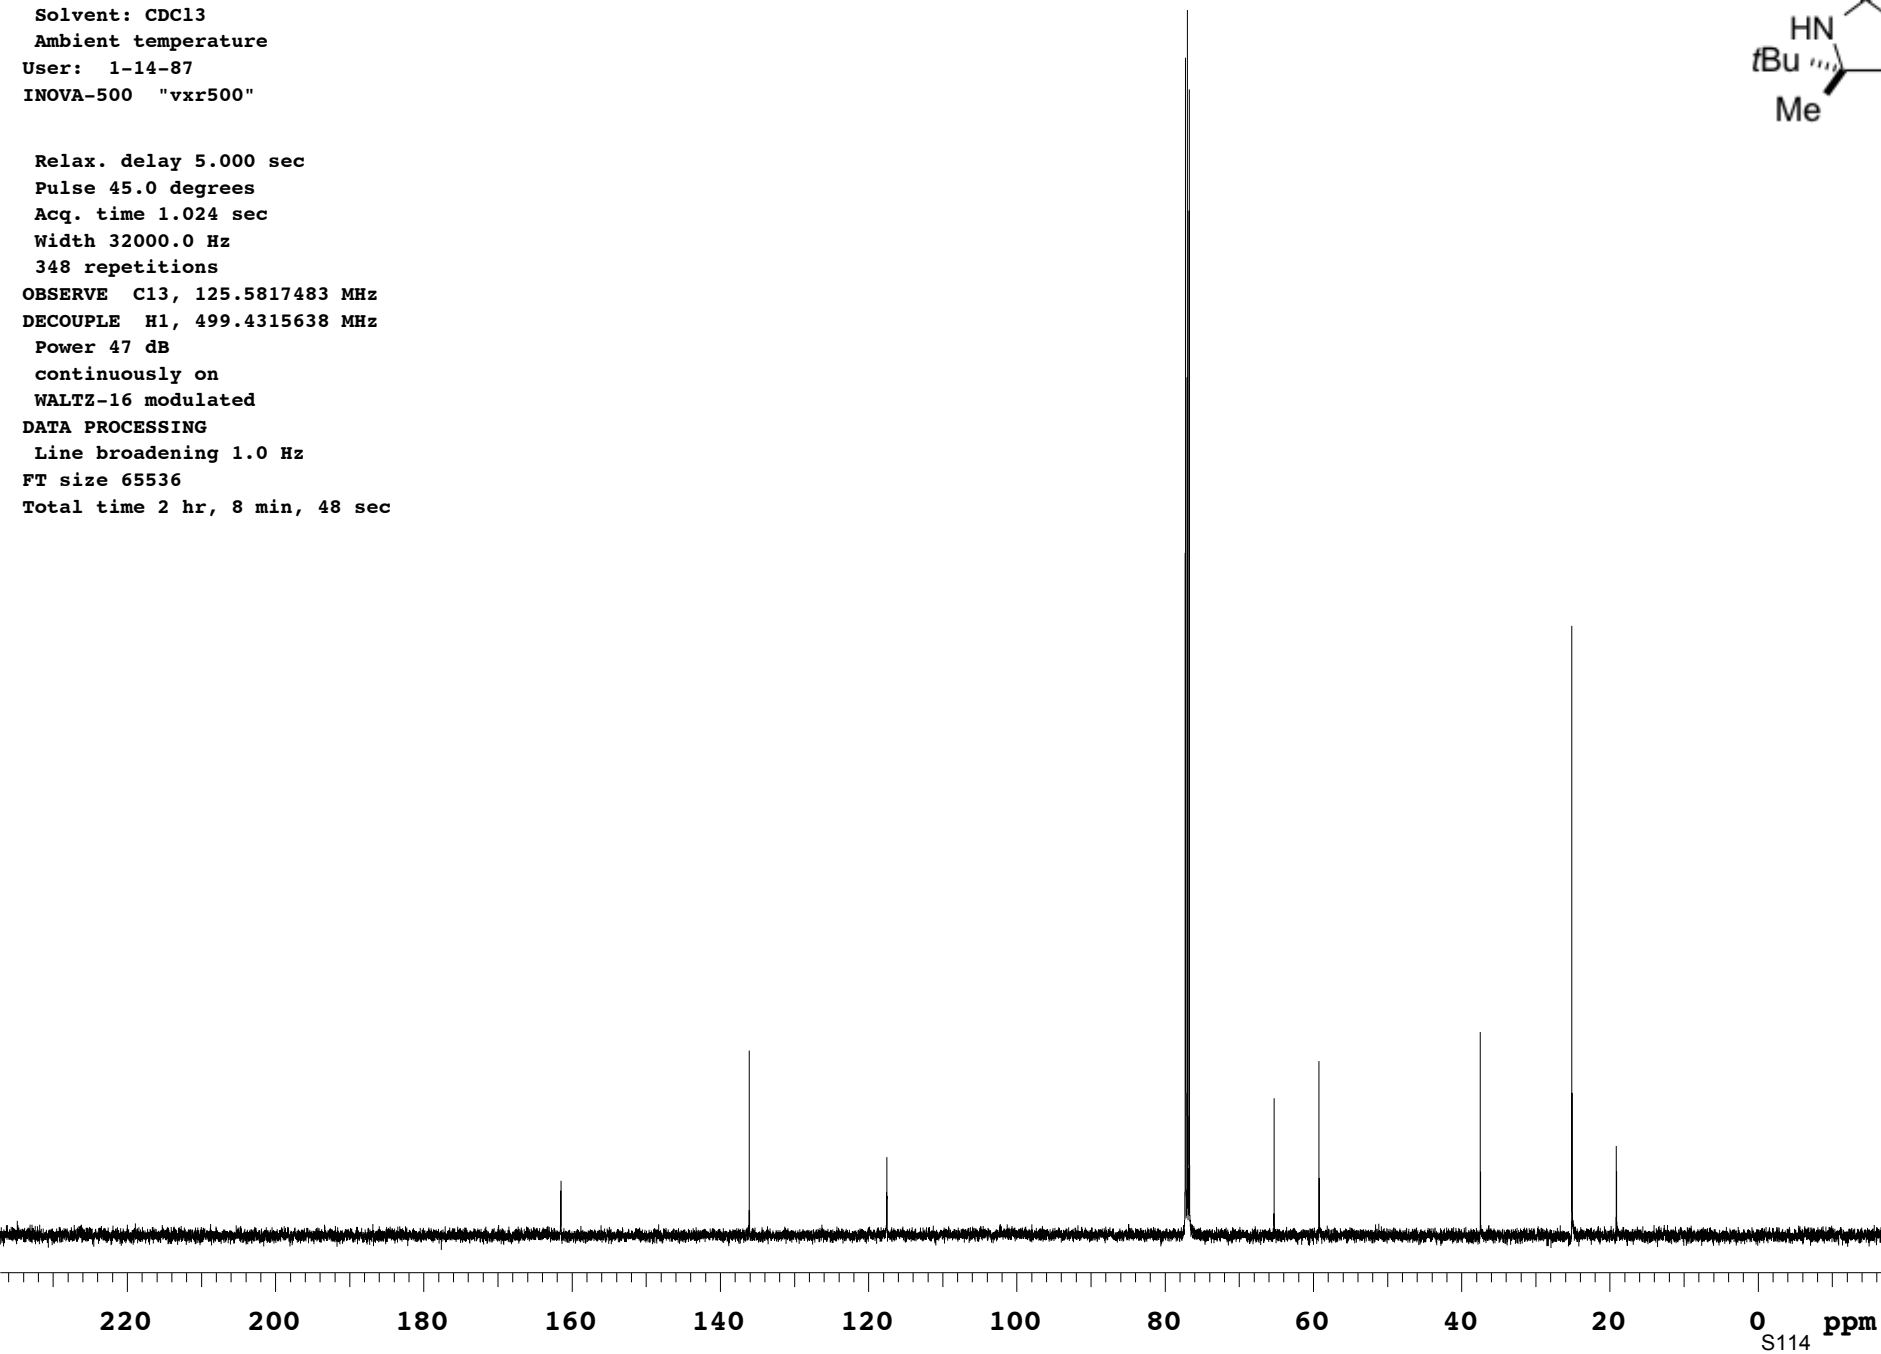

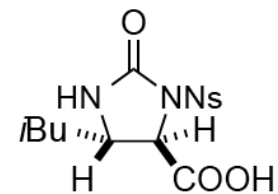

Pulse Sequence: s2pul

Solvent: CD3CN

Ambient temperature

INOVA-500 "vxr500"

Relax. delay 5.000 sec

Pulse 45.0 degrees

Acq. time 4.096 sec

Width 8000.0 Hz

8 repetitions

OBSERVE H1, 499.4325585 MHz

DATA PROCESSING

Line broadening 0.3 Hz

FT size 65536

Total time 1 min, 12 sec

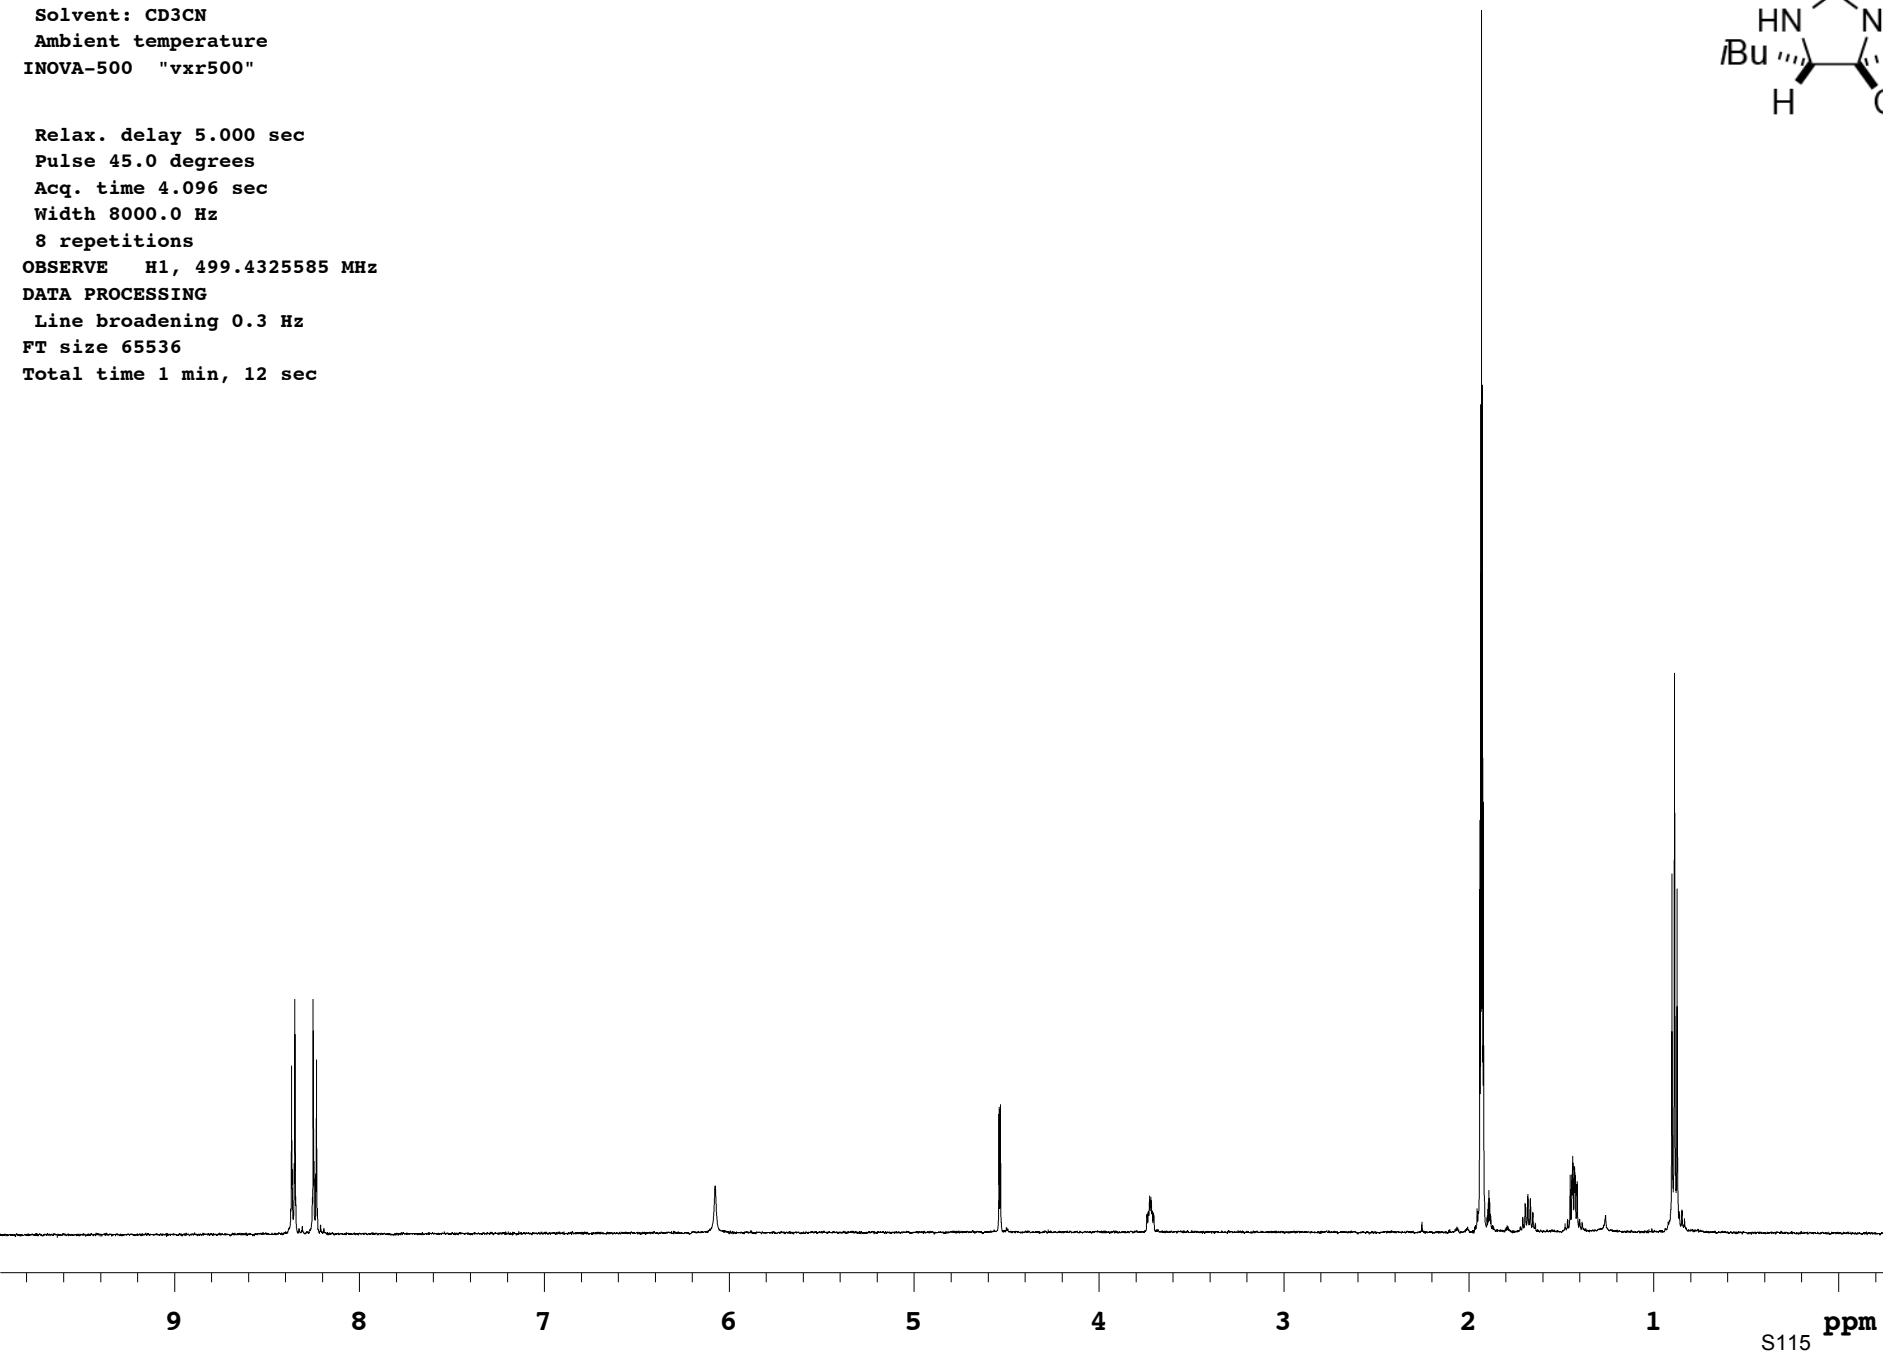

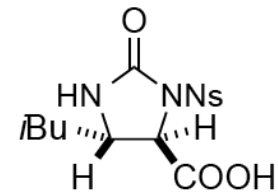

Pulse Sequence: s2pul

Solvent: CD3CN

Ambient temperature

User: 1-14-87

File: imid.acid.C

INOVA-500 "sunds1"

Relax. delay 5.000 sec

Pulse 45.0 degrees

Acq. time 1.024 sec

Width 32000.0 Hz

1516 repetitions

OBSERVE C13, 125.5822916 MHz

DECOUPLE H1, 499.4342058 MHz

Power 47 dB

continuously on

WALTZ-16 modulated

DATA PROCESSING

Line broadening 1.0 Hz

FT size 65536

Total time 10 hr, 43 min, 36 sec

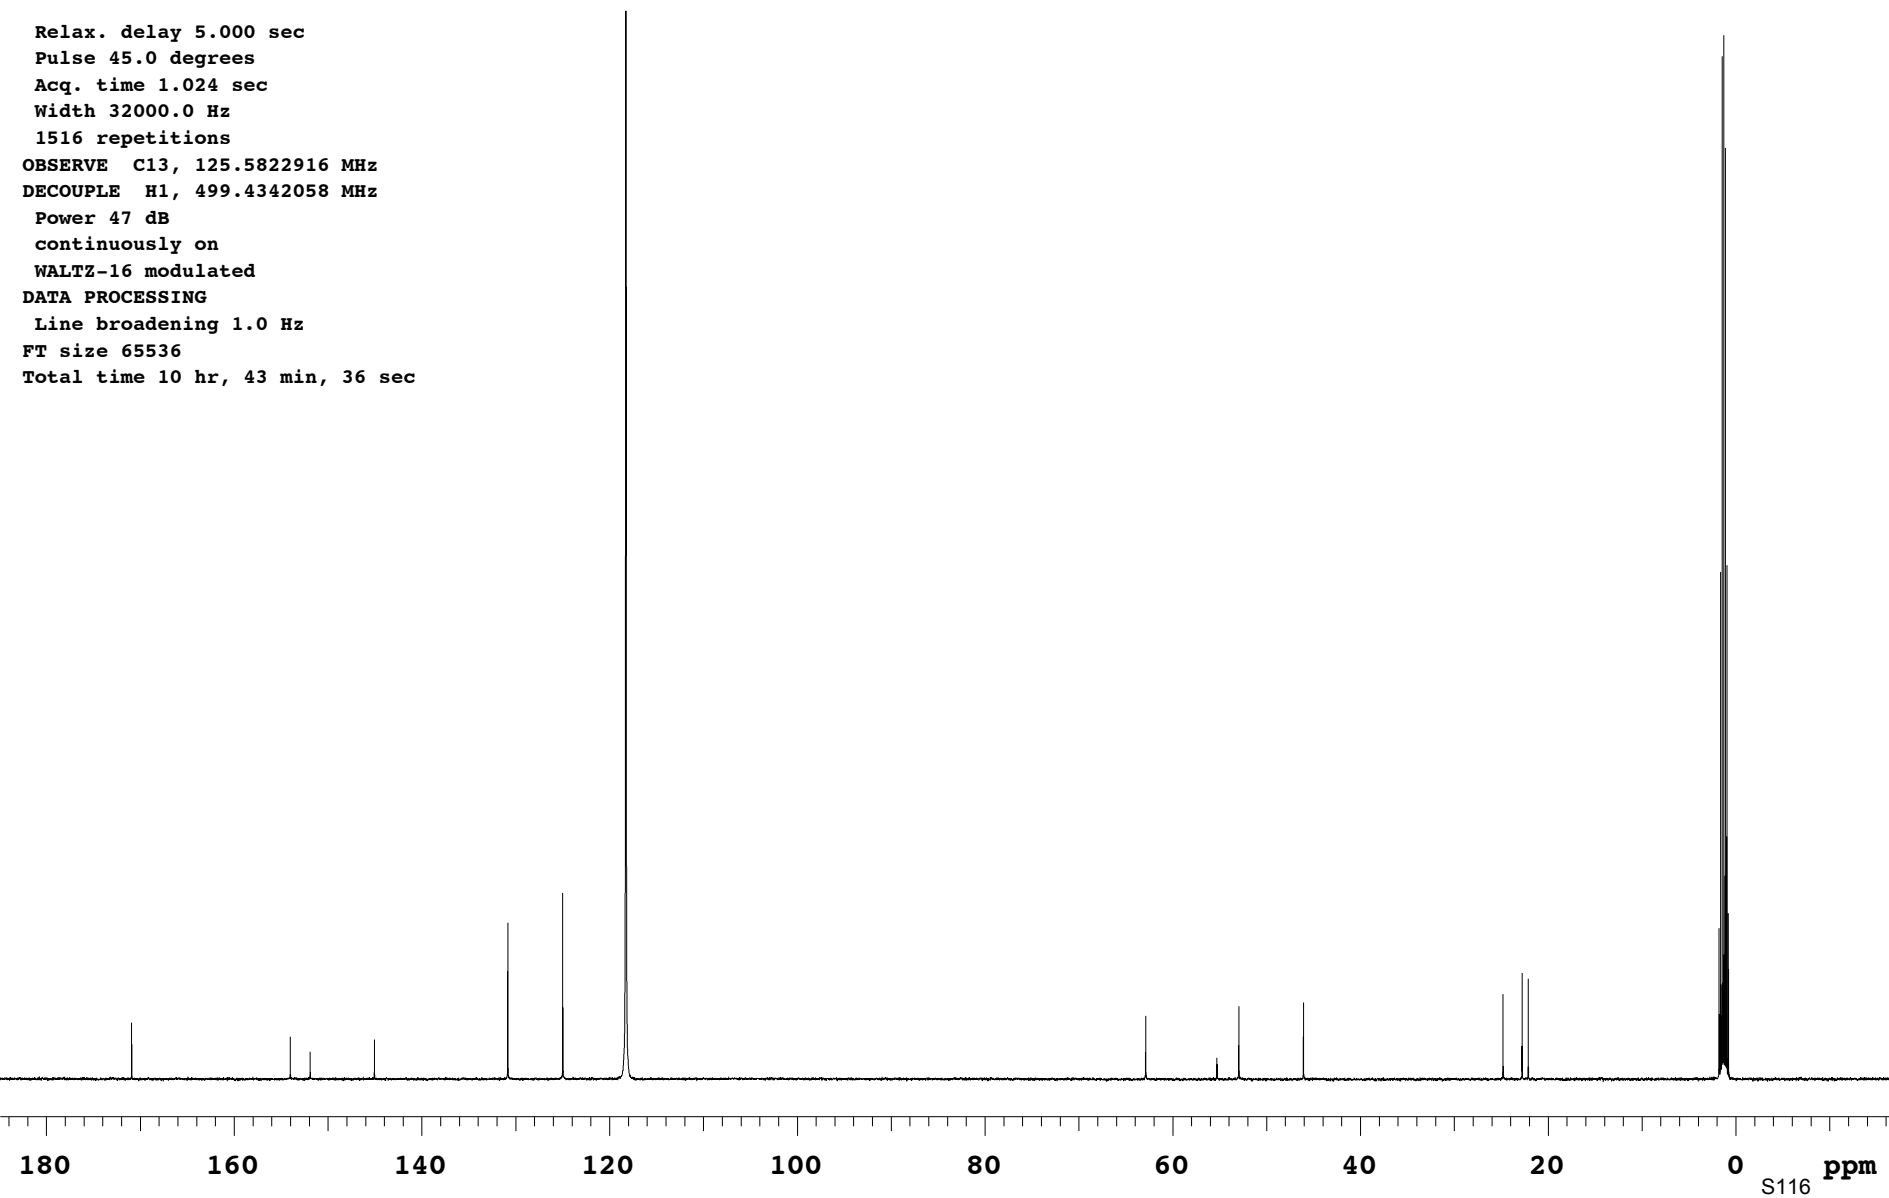

## Strambeanu and White

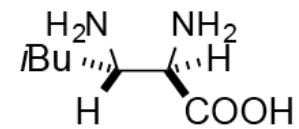

Pulse Sequence: s2pul

Solvent: D2O

Ambient temperature

File: diamineH

INOVA-500 "sunds1"

Relax. delay 5.000 sec

Pulse 90.0 degrees

Acq. time 4.096 sec

Width 8000.0 Hz

8 repetitions

OBSERVE H1, 500.0690491 MHz

DATA PROCESSING

Line broadening 0.3 Hz

FT size 65536

Total time 1 min, 12 sec

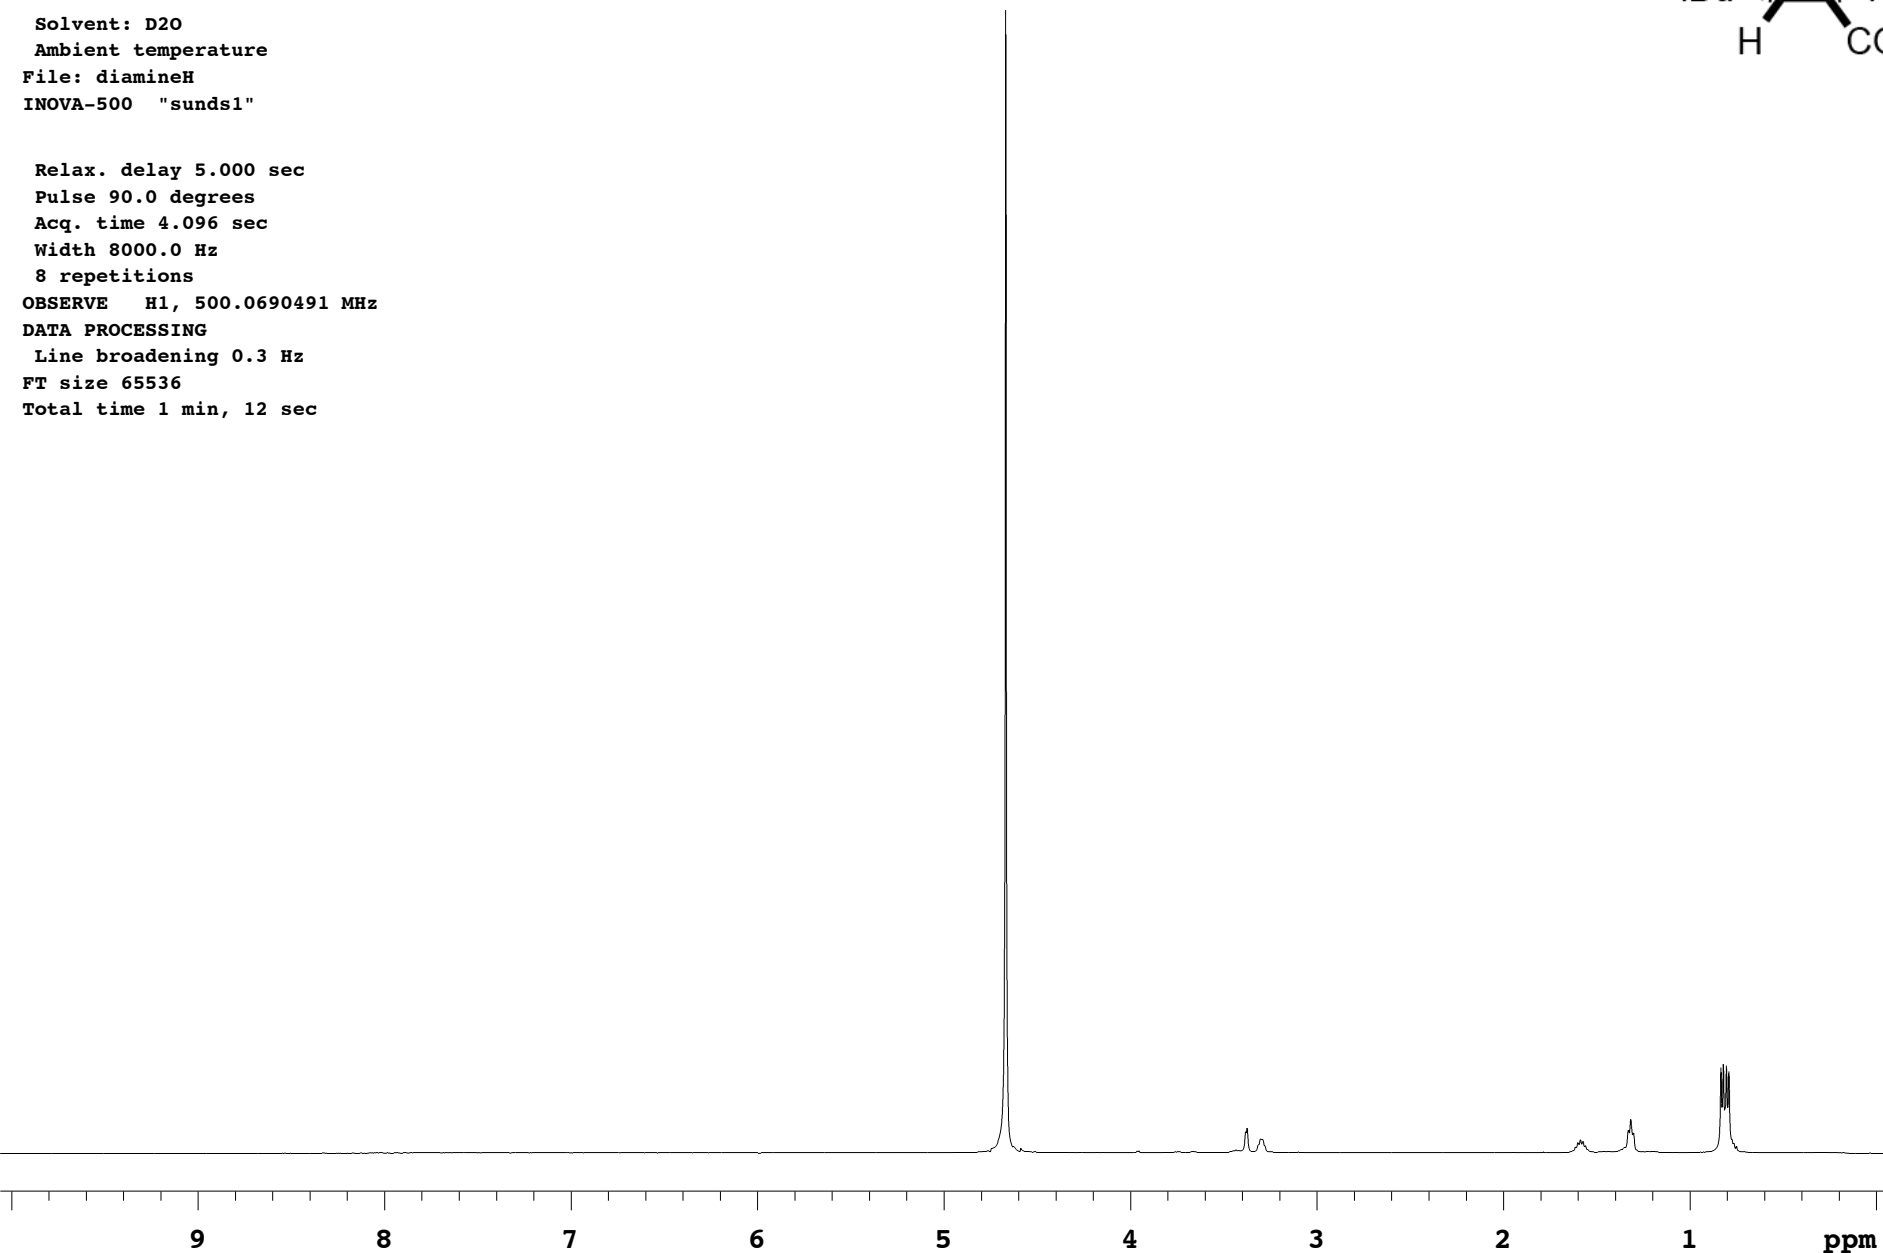

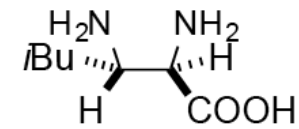

Pulse Sequence: s2pul

Solvent: D<sub>2</sub>O

Ambient temperature

User: 1-14-87

INOVA-500 "vxr500"

Relax. delay 5.000 sec

Pulse 45.0 degrees

Acq. time 1.024 sec

Width 32000.0 Hz

6654 repetitions

OBSERVE C13, 125.5820394 MHz

DECOUPLE H1, 499.4328473 MHz

Power 47 dB

continuously on

WALTZ-16 modulated

DATA PROCESSING

Line broadening 1.0 Hz

FT size 65536

Total time 21 hr, 27 min, 7 sec

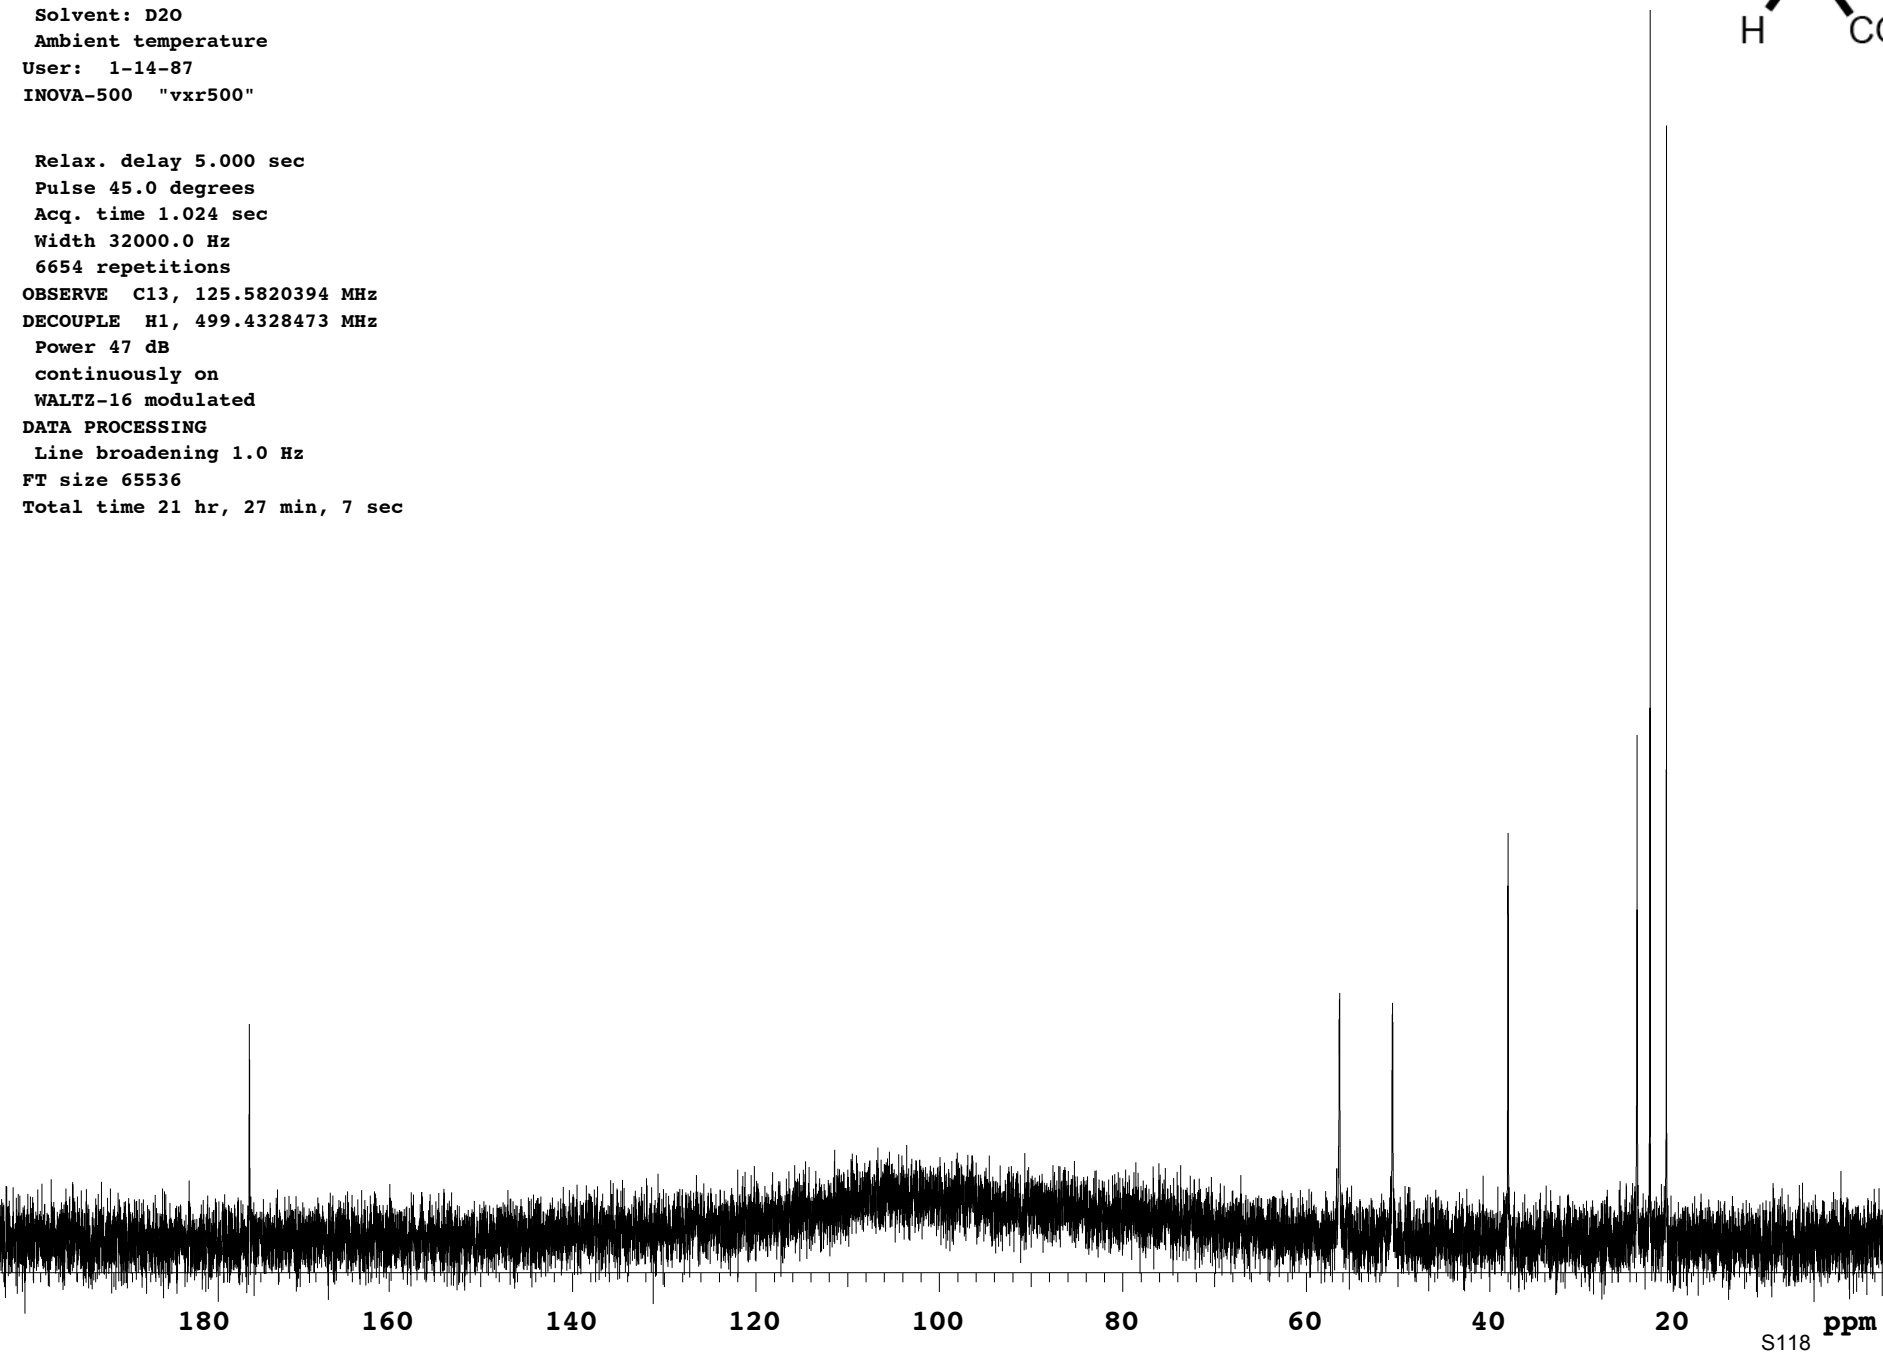

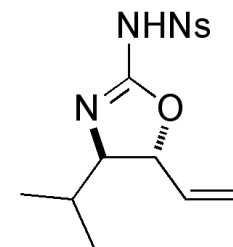

Racemic

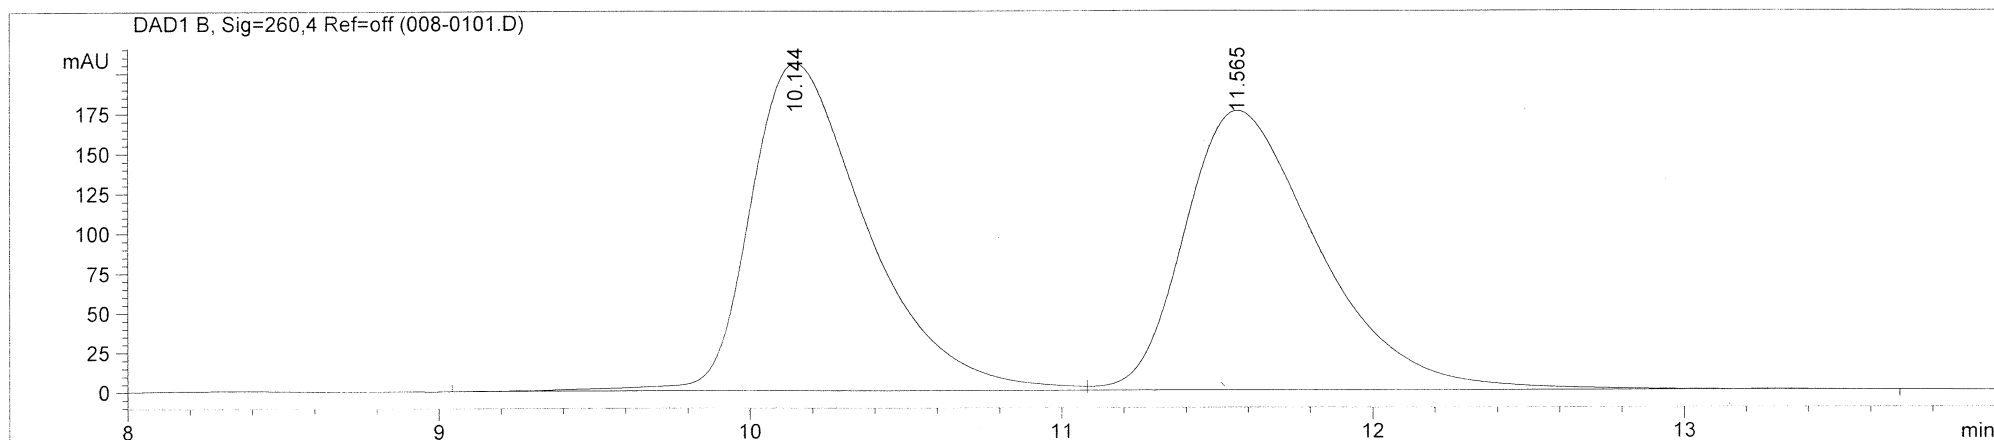

=====  
 Area Percent Report  
 =====

Sorted By : Signal  
 Multiplier : 1.0000  
 Dilution : 1.0000  
 Use Multiplier & Dilution Factor with ISTDs

Signal 1: DAD1 B, Sig=260,4 Ref=off

| Peak # | RetTime [min] | Type | Width [min] | Area [mAU*s] | Height [mAU] | Area %  |
|--------|---------------|------|-------------|--------------|--------------|---------|
| 1      | 10.144        | BV   | 0.3960      | 5356.85693   | 205.33366    | 50.1807 |
| 2      | 11.565        | VB   | 0.4624      | 5318.27441   | 175.77657    | 49.8193 |

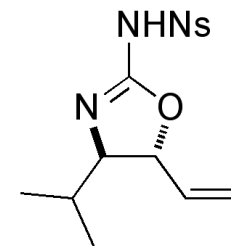

Enantiopure

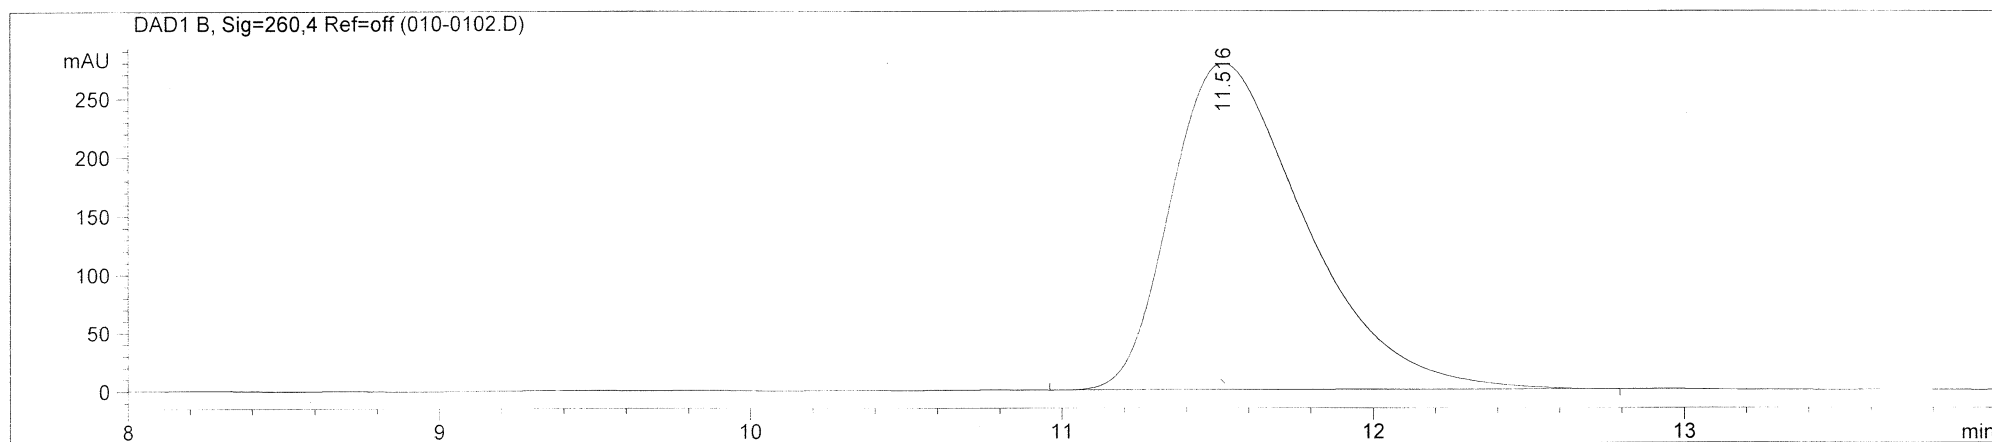

=====  
 Area Percent Report  
 =====

Sorted By : Signal  
 Multiplier : 1.0000  
 Dilution : 1.0000  
 Use Multiplier & Dilution Factor with ISTDs

Signal 1: DAD1 B, Sig=260,4 Ref=off

| Peak # | RetTime [min] | Type | Width [min] | Area [mAU*s] | Height [mAU] | Area %   |
|--------|---------------|------|-------------|--------------|--------------|----------|
| 1      | 11.516        | PV   | 0.4622      | 8389.36816   | 278.40936    | 100.0000 |

Totals : 8389.36816 278.40936

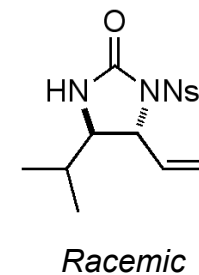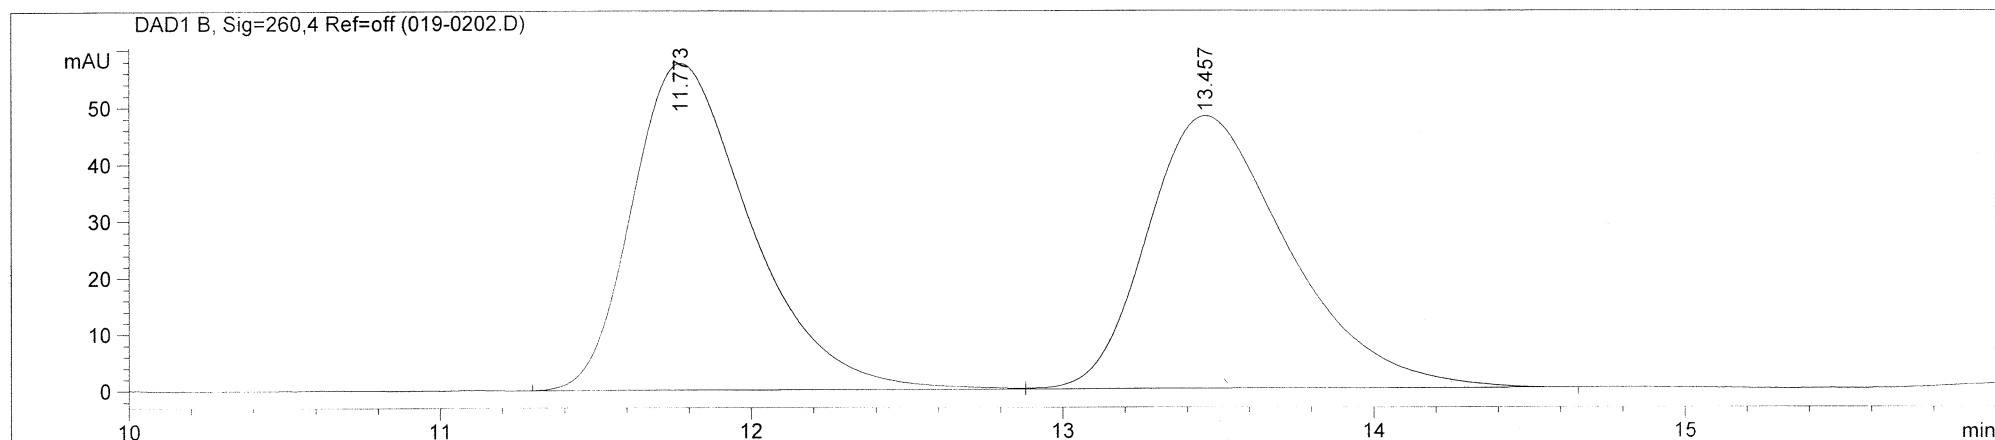

=====  
 Area Percent Report  
 =====

Sorted By : Signal  
 Multiplier : 1.0000  
 Dilution : 1.0000  
 Use Multiplier & Dilution Factor with ISTDs

Signal 1: DAD1 B, Sig=260,4 Ref=off

| Peak # | RetTime [min] | Type | Width [min] | Area [mAU*s] | Height [mAU] | Area %  |
|--------|---------------|------|-------------|--------------|--------------|---------|
| 1      | 11.773        | BV   | 0.3956      | 1529.78955   | 57.56527     | 50.0723 |
| 2      | 13.457        | VB   | 0.4796      | 1525.37341   | 48.11532     | 49.9277 |



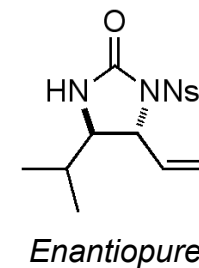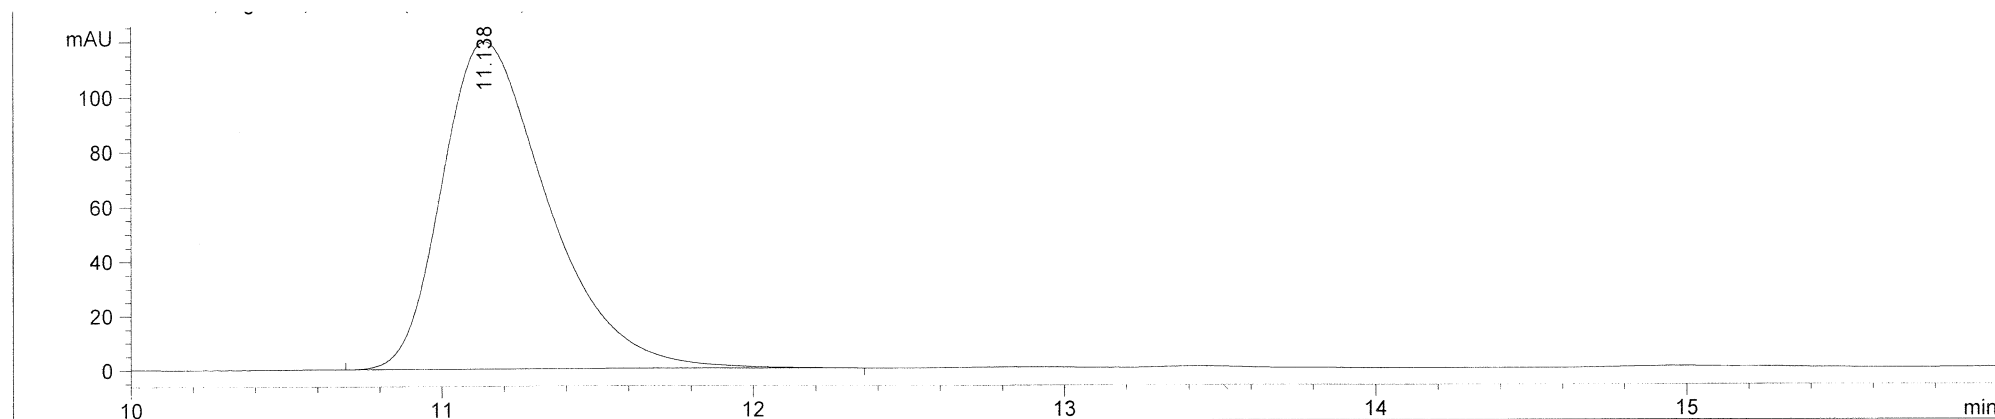

=====  
 Area Percent Report  
 =====

Sorted By : Signal  
 Multiplier : 1.0000  
 Dilution : 1.0000  
 Use Multiplier & Dilution Factor with ISTDs

Signal 1: DAD1 B, Sig=260,4 Ref=off

| Peak # | RetTime [min] | Type | Width [min] | Area [mAU*s] | Height [mAU] | Area %   |
|--------|---------------|------|-------------|--------------|--------------|----------|
| 1      | 11.138        | BB   | 0.3629      | 2831.71143   | 119.47504    | 100.0000 |

Totals : 2831.71143 119.47504

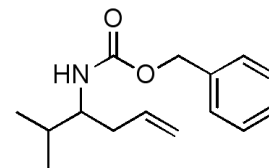

Racemic

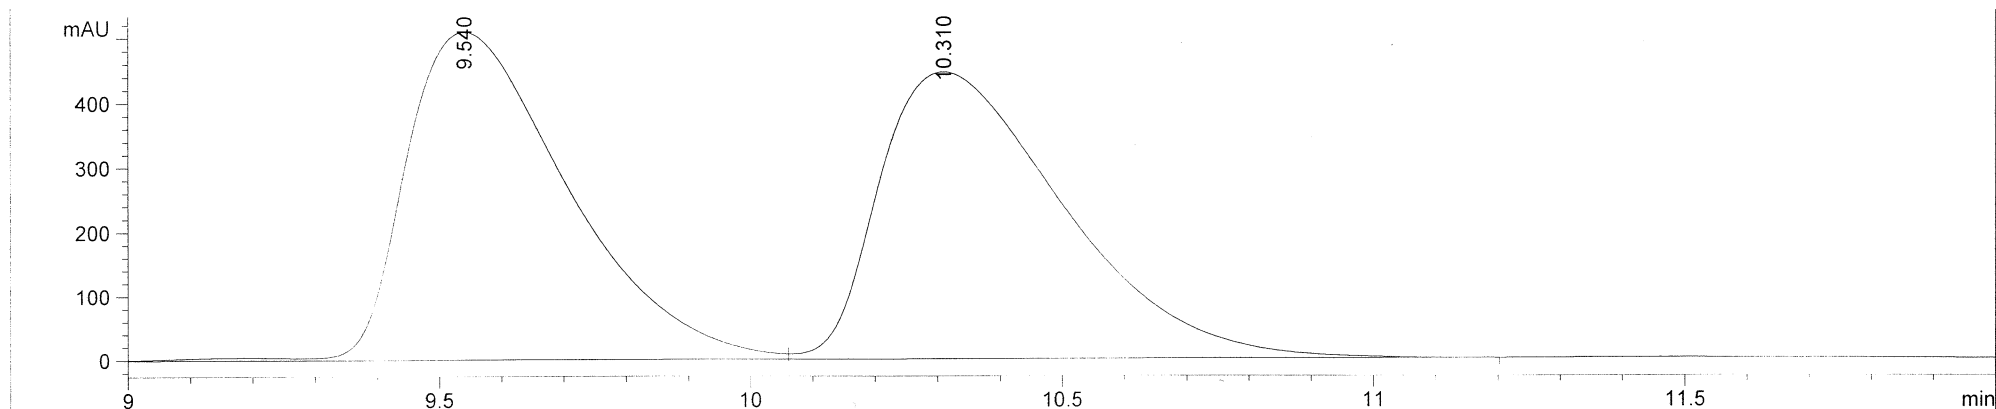

=====  
 Area Percent Report  
 =====

Sorted By : Signal  
 Multiplier : 1.0000  
 Dilution : 1.0000  
 Use Multiplier & Dilution Factor with ISTDs

Signal 1: DAD1 C, Sig=214,4 Ref=off

| Peak # | RetTime [min] | Type | Width [min] | Area [mAU*s] | Height [mAU] | Area %  |
|--------|---------------|------|-------------|--------------|--------------|---------|
| 1      | 9.540         | BV   | 0.2809      | 9244.64160   | 508.78873    | 50.1515 |
| 2      | 10.310        | VB   | 0.3214      | 9188.77930   | 446.07635    | 49.8485 |

Totals : 1.84334e4 954.86508

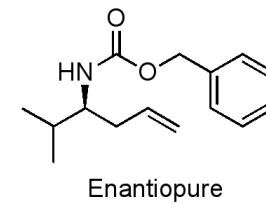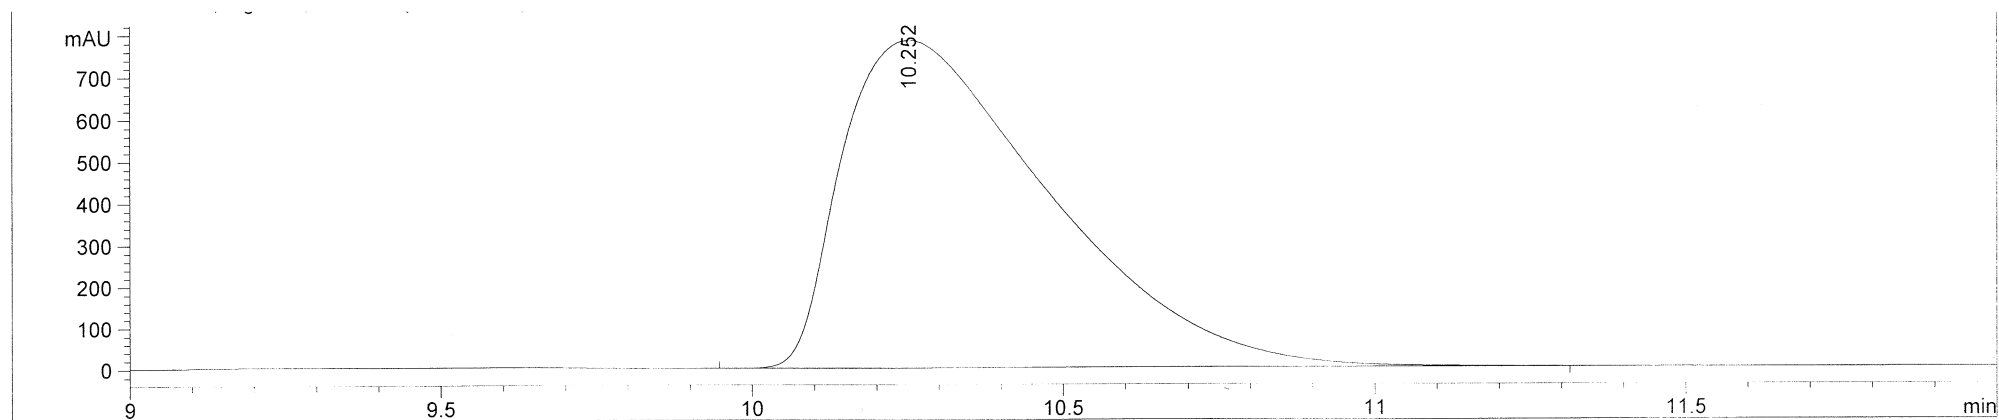

=====  
 Area Percent Report  
 =====

Sorted By : Signal  
 Multiplier : 1.0000  
 Dilution : 1.0000  
 Use Multiplier & Dilution Factor with ISTDs

Signal 1: DAD1 C, Sig=214,4 Ref=off

| Peak # | RetTime [min] | Type | Width [min] | Area [mAU*s] | Height [mAU] | Area %  |
|--------|---------------|------|-------------|--------------|--------------|---------|
| 1      | 4.645         | BV   | 0.0982      | 1863.58533   | 292.37411    | 8.3579  |
| 2      | 5.723         | BB   | 0.1200      | 2214.77856   | 282.25439    | 9.9329  |
| 3      | 10.252        | BB   | 0.3537      | 1.82190e4    | 783.78644    | 81.7092 |

expl NOESY1D

|             |         |                     |                |   |               |
|-------------|---------|---------------------|----------------|---|---------------|
| ACQUISITION |         | DECOU               |                |   |               |
| sw          | 8000.0  | dn                  |                |   |               |
| at          | 4.096   | dm                  |                |   |               |
| np          | 65536   |                     | SAM            |   |               |
| fb          | 4000    | date                | Jz             |   |               |
| bs          | 16      | solvent             | CDC13          | i | selpw         |
| ss          | -2      | file                | /export/home/~ | 1 | 32788.8       |
| d1          | 1.000   | data                | White/big1/MA~ | 2 | 32788.8       |
| nt          | 128     | B.tBu.Me.oxazoline~ |                |   |               |
| ct          | 128     | .noesy1.fid         |                | i | selpwr        |
| TRANSMITTER |         | SPECIAL             |                | 1 | 7             |
| tn          | H1      | temp                | not used       | 2 | 7             |
| sfrq        | 500.070 | gain                | 60             |   |               |
| tof         | 0       | spin                | not used       | i | selshape      |
| tpwr        | 58      | pw90                | 6.500          | 1 | NOESY1D_1_24p |
| pw          | 6.500   | FLAGS               |                | 2 | NOESY1D_1_24p |

|          |          |       |  |    |
|----------|----------|-------|--|----|
| NOESY    |          | sspul |  | y  |
| mix      | 0.500    | il    |  | n  |
| sweepwr  | 40       | in    |  | n  |
| freq     | 1500.000 | h1    |  | n  |
| sweepshp | sech180  | hs    |  | nn |

|           |         |            |          |
|-----------|---------|------------|----------|
| SEL PULSE |         | PROCESSING |          |
| selfrq    | 0       | lb         | 0.24     |
| selshape  | arrayed | fn         | not used |
| selpwr    | arrayed |            |          |

|          |         |               |
|----------|---------|---------------|
| DISPLAY  |         |               |
| selpw12  | arrayed | sp 10 -1519.4 |
| GRADIENT |         | wp 7999.8     |

|               |          |      |         |
|---------------|----------|------|---------|
| gzlv11        | 857      | vs   | 4349    |
| gt1           | 0.000500 | sc   | 0       |
| gzlv12        | 3430     | wc   | 250     |
| gt2           | 0.005000 | hzmm | 32.00   |
| gstab         | 0.000500 | is   | 33.57   |
| hsglv1        | 4288     | rfl  | 1510.6  |
| hsgt          | 0.010000 | rpf  | 0       |
| PRESATURATION |          | th   | 7       |
| satfrq        | 0        | ins  | 100.000 |
| satpwr        | 0        | ai   | ph      |
| satdly        | 0        |      |         |
| satmode       | n        |      |         |

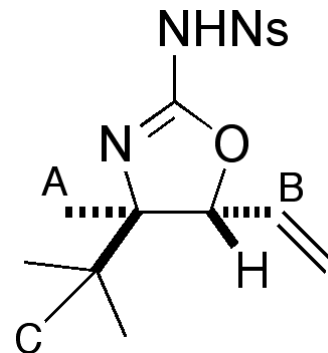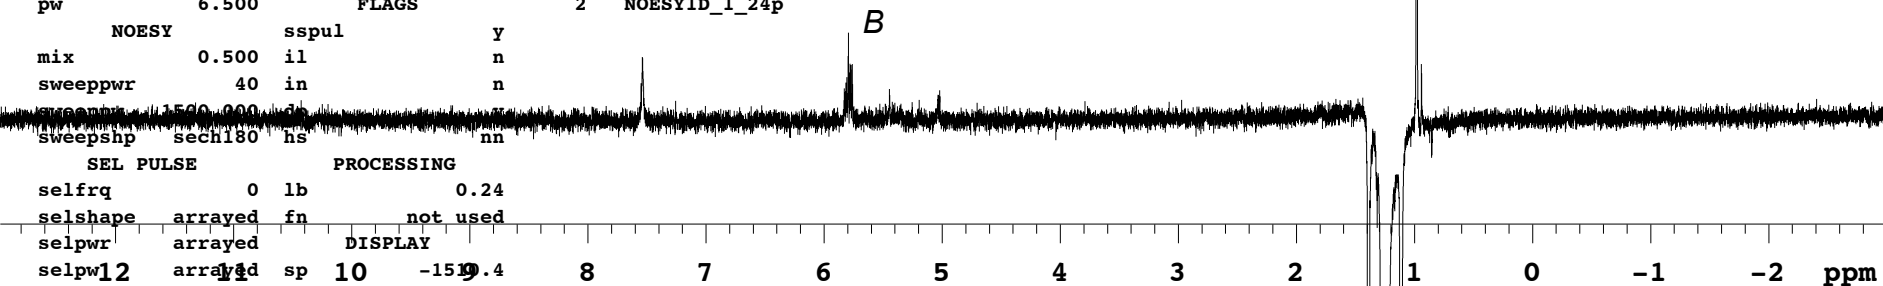

A

C

expl NOESY1D

| ACQUISITION   |            | DECOUPL             |                |
|---------------|------------|---------------------|----------------|
| sw            | 8000.0     | dn                  |                |
| at            | 4.096      | dm                  |                |
| np            | 65536      | SAMPL               |                |
| fb            | 4000       | date                | Jan            |
| bs            | 16         | solvent             | CDC13          |
| ss            | -2         | file                | /export/home/~ |
| d1            | 1.000      | data                | White/big1/MA~ |
| nt            | 128        | B.tBu.Me.oxazoline~ |                |
| ct            | 128        | .noesy2.fid         |                |
| TRANSMITTER   |            | SPECIAL             |                |
| tn            | H1         | temp                | not used       |
| sfrq          | 500.070    | gain                | 60             |
| tof           | 0          | spin                | not used       |
| tpwr          | 58         | pw90                | 6.500          |
| pw            | 6.500      | FLAGS               |                |
|               | NOESY      | sspul               | y              |
| mix           | 0.500      | il                  | n              |
| sweepwr       | 40         | in                  | n              |
| sweeppw       | 1500.000   | dp                  | y              |
| sweepshp      | sech180    | hs                  | nn             |
| SEL PULSE     |            | PROCESSING          |                |
| selfrq        | 0          | lb                  | 0.24           |
| selshape      | NOESY1D 0~ | fn                  | not used       |
|               | 98p        | DISPLAY             |                |
| selpw1        | 112        | sp                  | 10 -1519.4     |
| selpw         | 56680.0    | wp                  | 7999.8         |
| GRADIENT      |            | vs                  |                |
| gzlv11        | 857        | sc                  | 0              |
| gt1           | 0.000500   | wc                  | 250            |
| gzlv12        | 3430       | hzmm                | 32.00          |
| gt2           | 0.005000   | is                  | 775.93         |
| gstab         | 0.000500   | rfl                 | 1510.6         |
| hsglv1        | 4288       | rpf                 | 0              |
| hsgt          | 0.010000   | th                  | 7              |
| PRESATURATION |            | ins                 |                |
| satfrq        | 0          | ai                  | ph             |
| satpwr        | 0          |                     |                |
| satdly        | 0          |                     |                |
| satmode       | n          |                     |                |

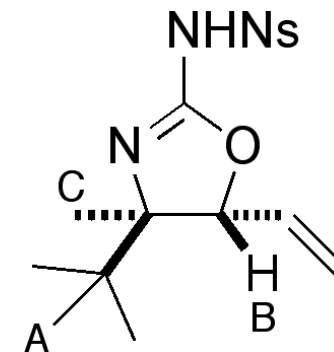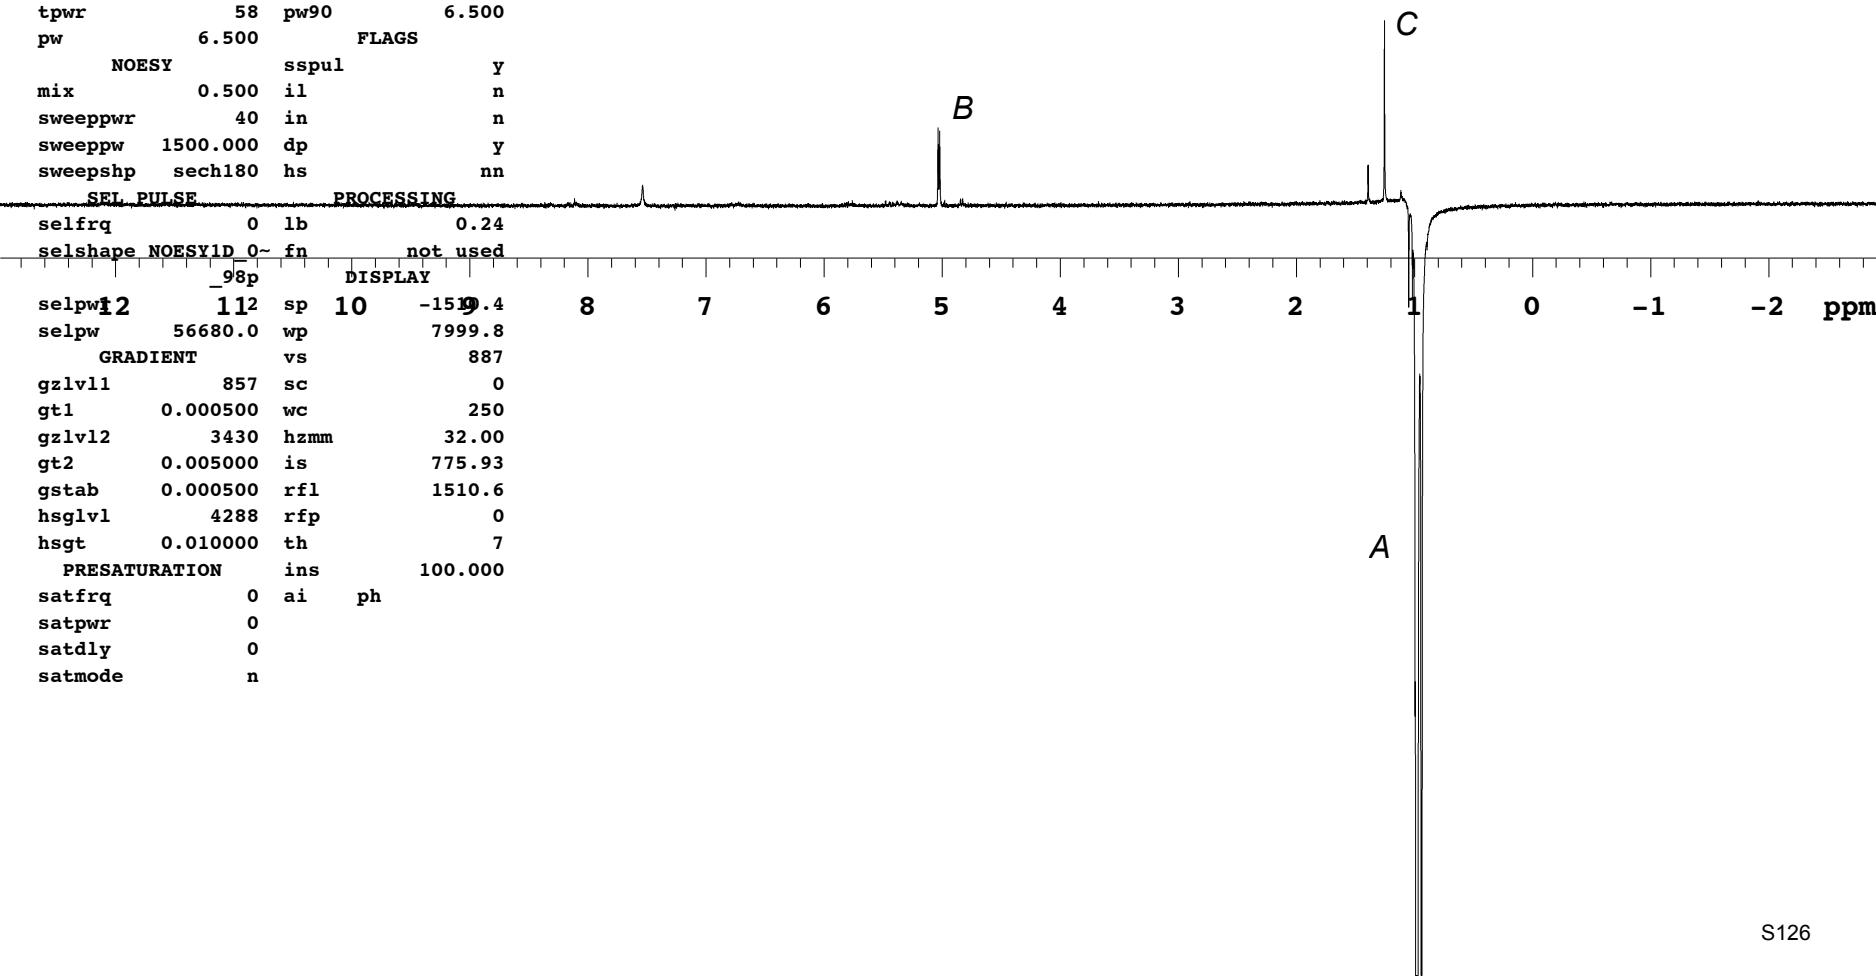

expl s2pul

| SAMPLE      |            | DEC. &     |          |
|-------------|------------|------------|----------|
| date        | Jan 7 2013 | dfrq       |          |
| solvent     | CDC13      | dn         |          |
| file        | exp        | dpwr       |          |
| ACQUISITION |            | dof        |          |
| sfrq        | 500.070    | dm         | nnn      |
| tn          | H1         | dmm        | c        |
| at          | 4.096      | dmf        | 200      |
| np          | 65536      | dseq       |          |
| sw          | 8000.0     | dres       | 1.0      |
| fb          | 4000       | homo       | n        |
| bs          | 16         | DEC2       |          |
| tpwr        | 58         | dfrq2      | 0        |
| pw          | 6.5        | dn2        |          |
| d1          | 0          | dpwr2      | 1        |
| tof         | 0          | dof2       | 0        |
| nt          | 4          | dm2        | n        |
| ct          | 4          | dmm2       | c        |
| alock       | n          | dmf2       | 200      |
| gain        | not used   | dseq2      |          |
| FLAGS       |            | dres2      | 1.0      |
| il          | n          | homo2      | n        |
| in          | n          | PROCESSING |          |
| dp          | y          | lb         | 0.30     |
| hs          | nn         | wtfile     |          |
| DISPLAY     |            | proc       | ft       |
| sp          | -1013.8    | fn         | not used |
| wp          | 7017.1     | math       | f        |
| vs          | 79         |            |          |
| sc          | 0          | werr       |          |
| wc          | 250        | wexp       |          |
| hzmm        | 28.07      | wbs        |          |
| is          | 33.57      | wnt        |          |
| rfl         | 5141.6     |            |          |
| rfp         | 3630.5     |            |          |
| th          | 7          |            |          |
| ins         | 100.000    |            |          |
| ai          | ph         |            |          |

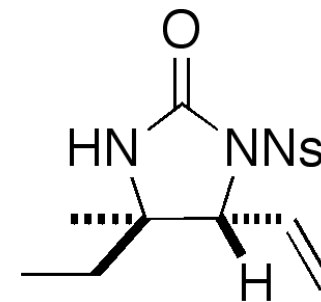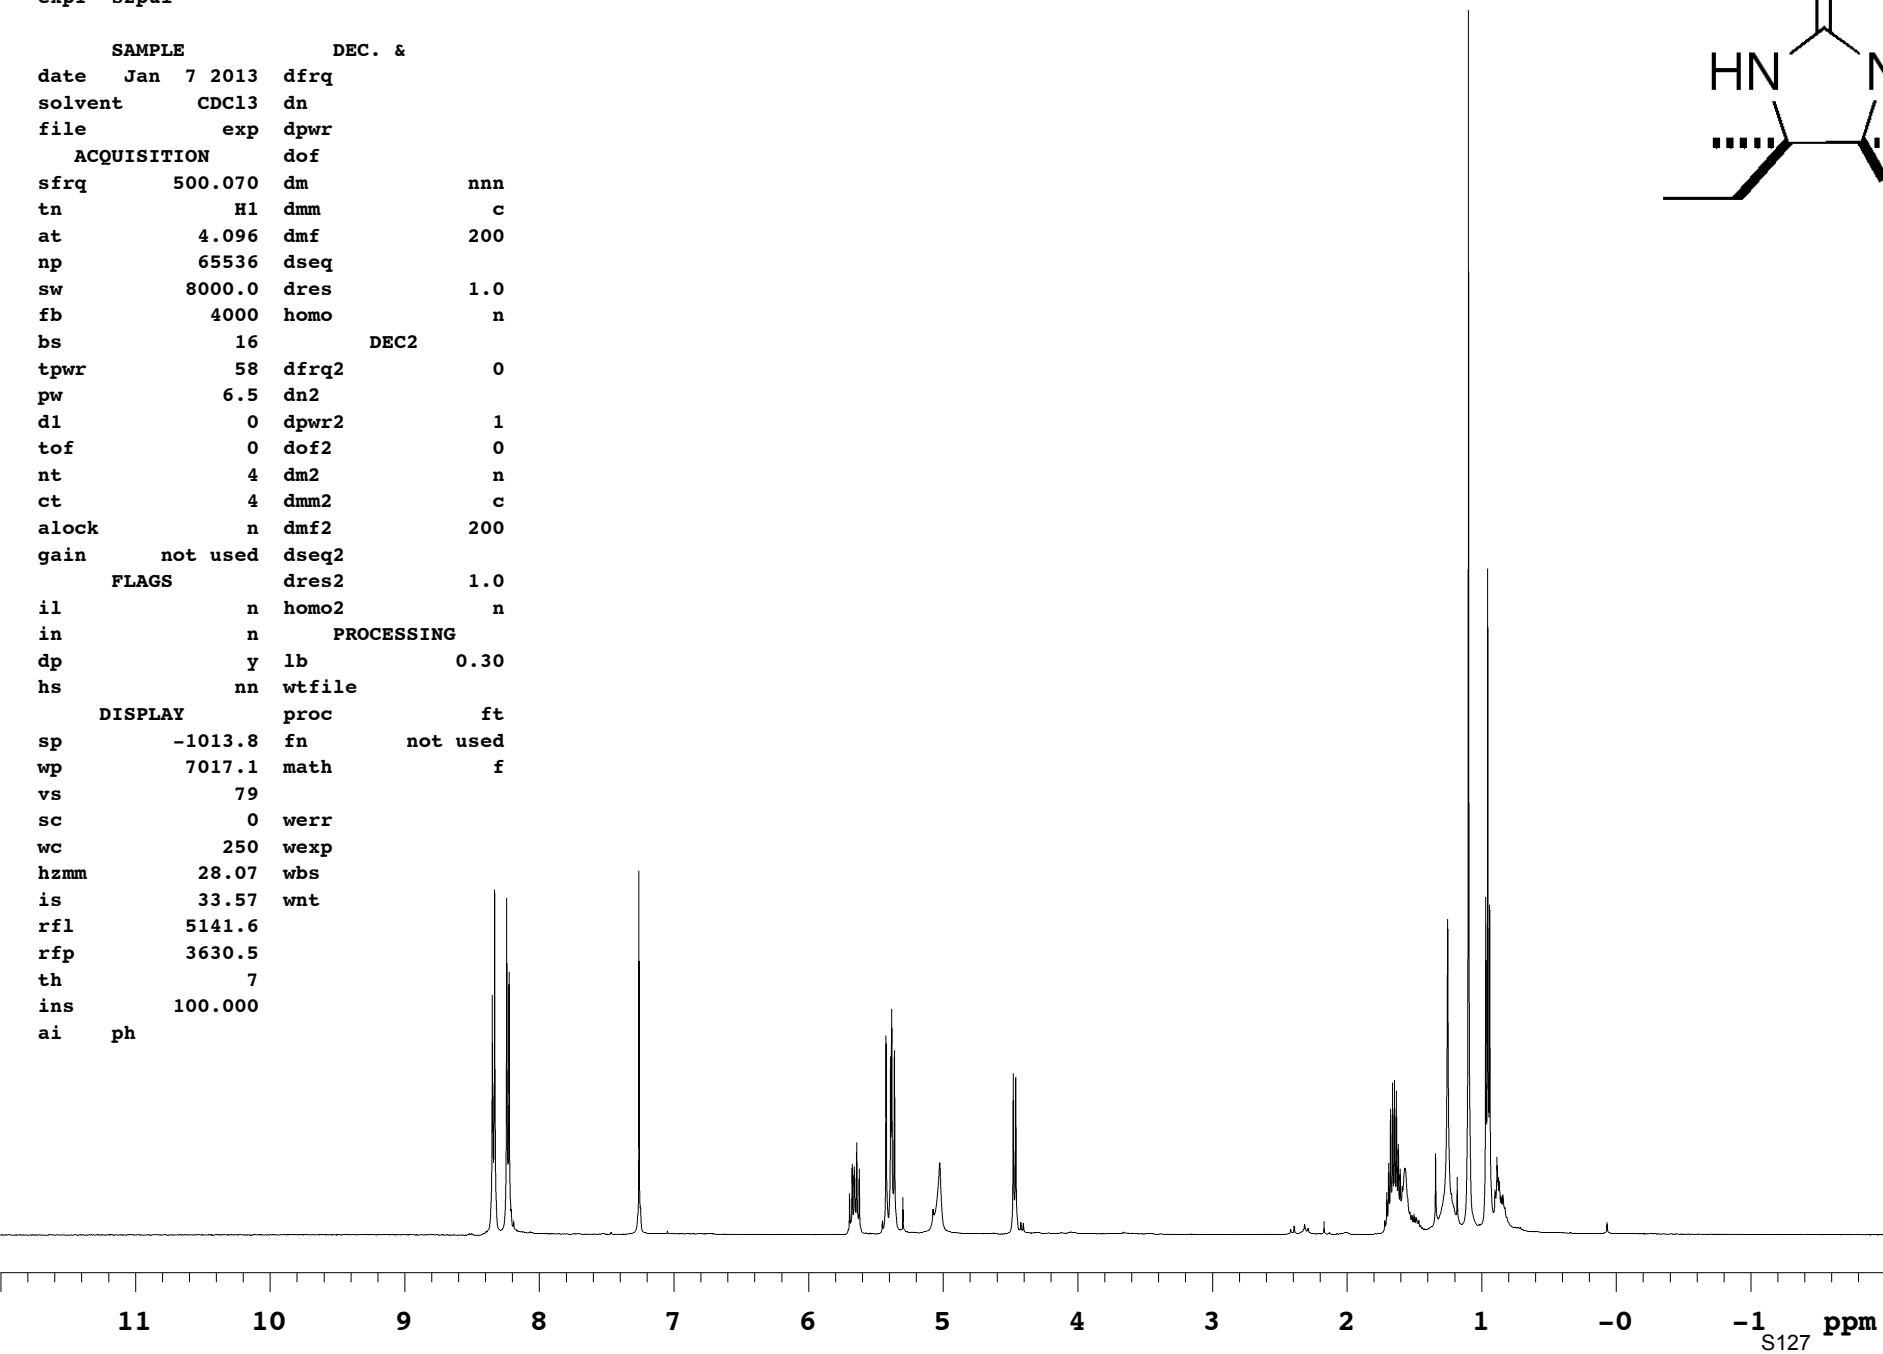

expl NOESY1D

| ACQUISITION |        | DI                  |                |
|-------------|--------|---------------------|----------------|
| sw          | 8000.0 | dn                  |                |
| at          | 4.096  | dm                  |                |
| np          | 65536  |                     |                |
| fb          | 4000   | date                |                |
| bs          | 16     | solvent             | CDC13          |
| ss          | -2     | file                | /export/home/~ |
| d1          | 1.000  | data/White/big1/MA~ |                |
| nt          | 128    | B.Me.Et.imid.noesy~ |                |
| ct          | 128    | .fid                |                |

| TRANSMITTER |         | SPECIAL |          |
|-------------|---------|---------|----------|
| tn          | H1      | temp    | not used |
| sfrq        | 500.070 | gain    | 60       |
| tof         | 0       | spin    | not used |
| tpwr        | 58      | pw90    | 6.500    |
| pw          | 6.500   | FLAGS   |          |

| NOESY    |         | sspul |    |
|----------|---------|-------|----|
| mix      | 0.500   | il    | n  |
| sweeppwr | 40      | in    | n  |
| sweepshp | sech180 | hs    | in |

| SEL PULSE |            | PROCESSING |          |
|-----------|------------|------------|----------|
| selfrq    | 0          | lb         | 0.24     |
| selshape  | NOESY1D_1~ | fn         | not used |

|        |         | DISPLAY |        |
|--------|---------|---------|--------|
| selpw1 | 114     | sp      | 10     |
| selpw  | 46113.1 | wp      | 7999.8 |

| GRADIENT |          | vs   |         |
|----------|----------|------|---------|
| gzlv11   | 857      | sc   | 0       |
| gt1      | 0.000500 | wc   | 250     |
| gzlv12   | 3430     | hzmm | 32.00   |
| gt2      | 0.005000 | is   | 1403.82 |
| gstab    | 0.000500 | rfl  | 1511.1  |
| hsglv1   | 4288     | rpf  | 0       |
| hsgt     | 0.010000 | th   | 7       |

| PRESATURATION |   | ins |    |
|---------------|---|-----|----|
| satfrq        | 0 | ai  | ph |
| satpwr        | 0 |     |    |
| satdly        | 0 |     |    |
| satmode       | n |     |    |

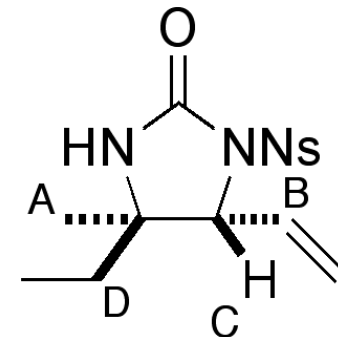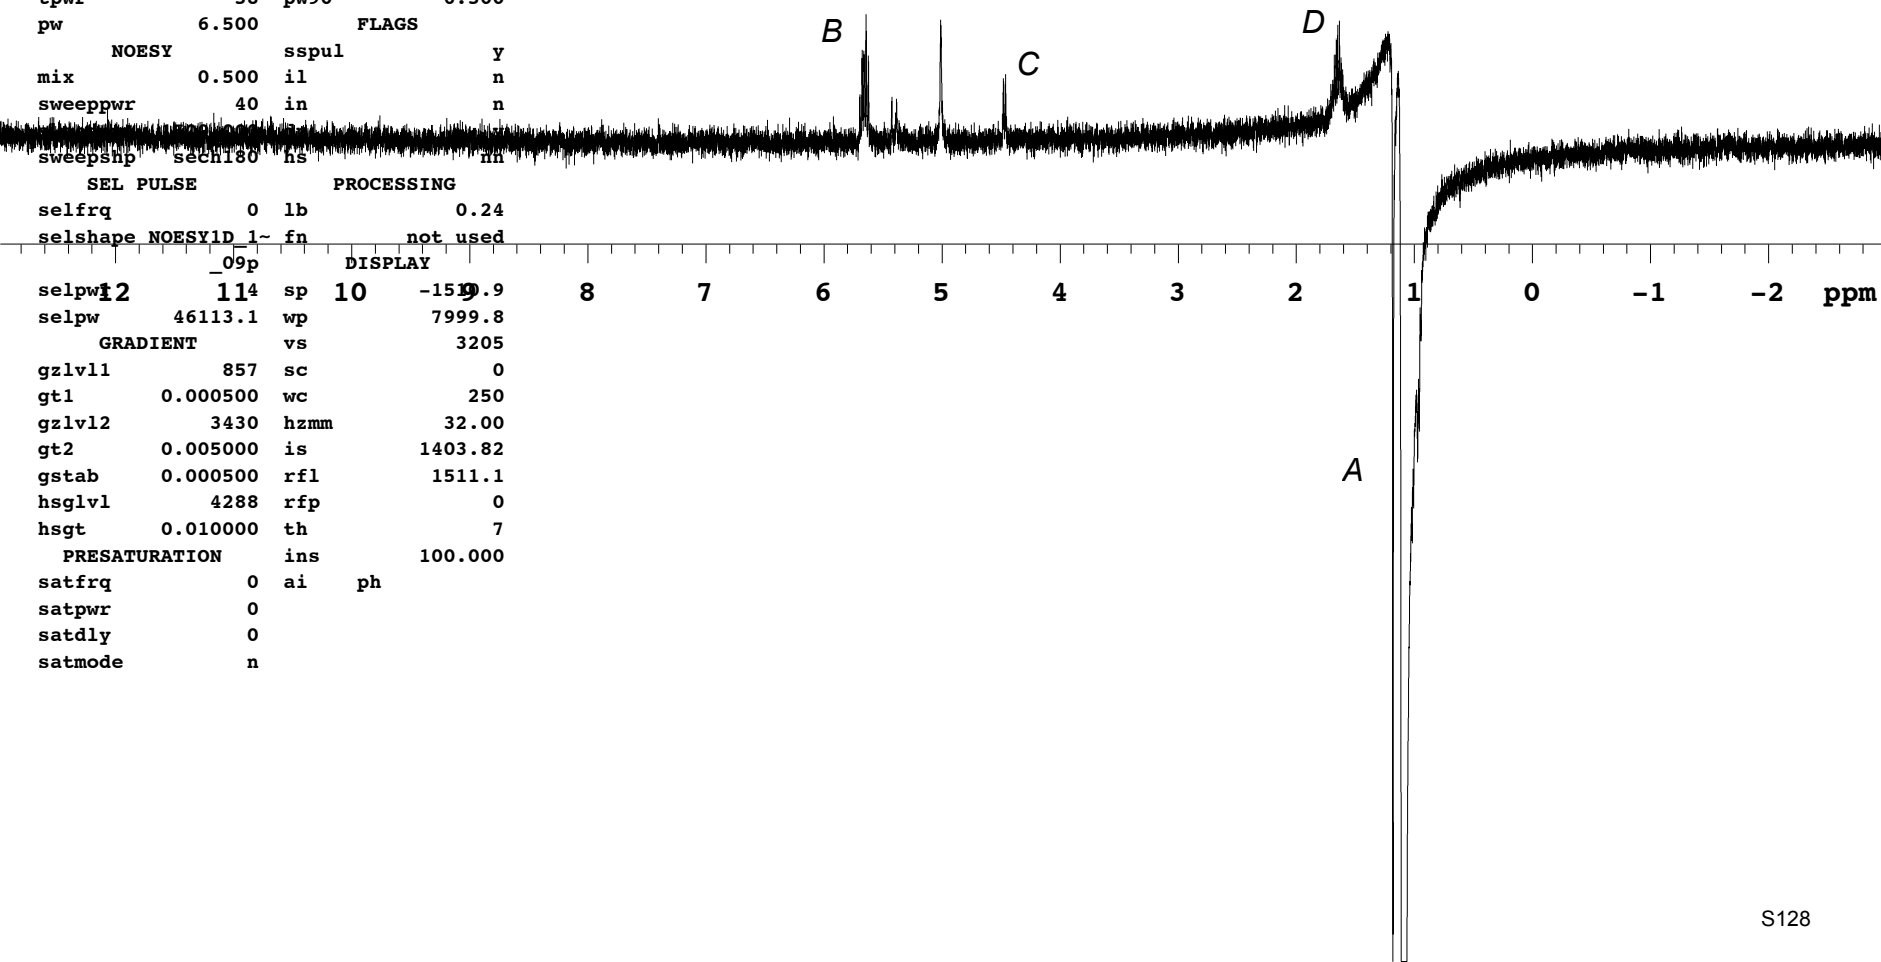

expl NOESY1D

| ACQUISITION |        | DE                  |                |
|-------------|--------|---------------------|----------------|
| sw          | 8000.0 | dn                  |                |
| at          | 4.096  | dm                  |                |
| np          | 65536  |                     |                |
| fb          | 4000   | date                |                |
| bs          | 16     | solvent             | CDC13          |
| ss          | -2     | file                | /export/home/~ |
| d1          | 1.000  | data                | White/big/MA~  |
| nt          | 128    | B.Me.Et.imid.noesy~ |                |
| ct          | 128    |                     | 2.fid          |

| TRANSMITTER |         | SPECIAL |          |
|-------------|---------|---------|----------|
| tn          | H1      | temp    | not used |
| sfrq        | 500.070 | gain    | 60       |
| tof         | 0       | spin    | not used |
| tpwr        | 58      | pw90    | 6.500    |
| pw          | 6.500   | FLAGS   |          |

| NOESY    |          | sspul |   |
|----------|----------|-------|---|
| mix      | 0.500    | il    | n |
| sweeppwr | 40       | in    | n |
| sweeppw  | 1500.000 | dp    | y |

| SEL PULSE |            | PROCESSING |          |
|-----------|------------|------------|----------|
| selfrq    | 0          | lb         | 0.24     |
| selshape  | NOESY1D 4~ | fn         | not used |

|        |         | DISPLAY |        |
|--------|---------|---------|--------|
| selpw1 | 117     | sp      | 10     |
| selpw  | 32490.0 | wp      | 7999.8 |

| GRADIENT |          | vs   |         |
|----------|----------|------|---------|
| gzlv11   | 857      | sc   | 0       |
| gt1      | 0.000500 | wc   | 250     |
| gzlv12   | 3430     | hzmm | 32.00   |
| gt2      | 0.005000 | is   | 1403.82 |
| gstab    | 0.000500 | rfl  | 1511.1  |
| hsglv1   | 4288     | rpf  | 0       |
| hsgt     | 0.010000 | th   | 7       |

| PRESATURATION |   | ins |    |
|---------------|---|-----|----|
| satfrq        | 0 | ai  | ph |
| satpwr        | 0 |     |    |
| satdly        | 0 |     |    |
| satmode       | n |     |    |

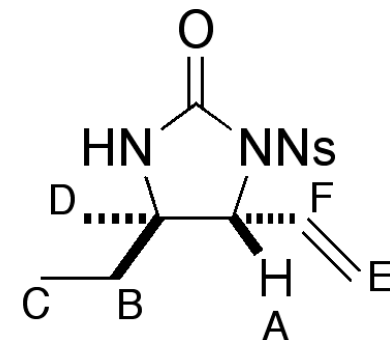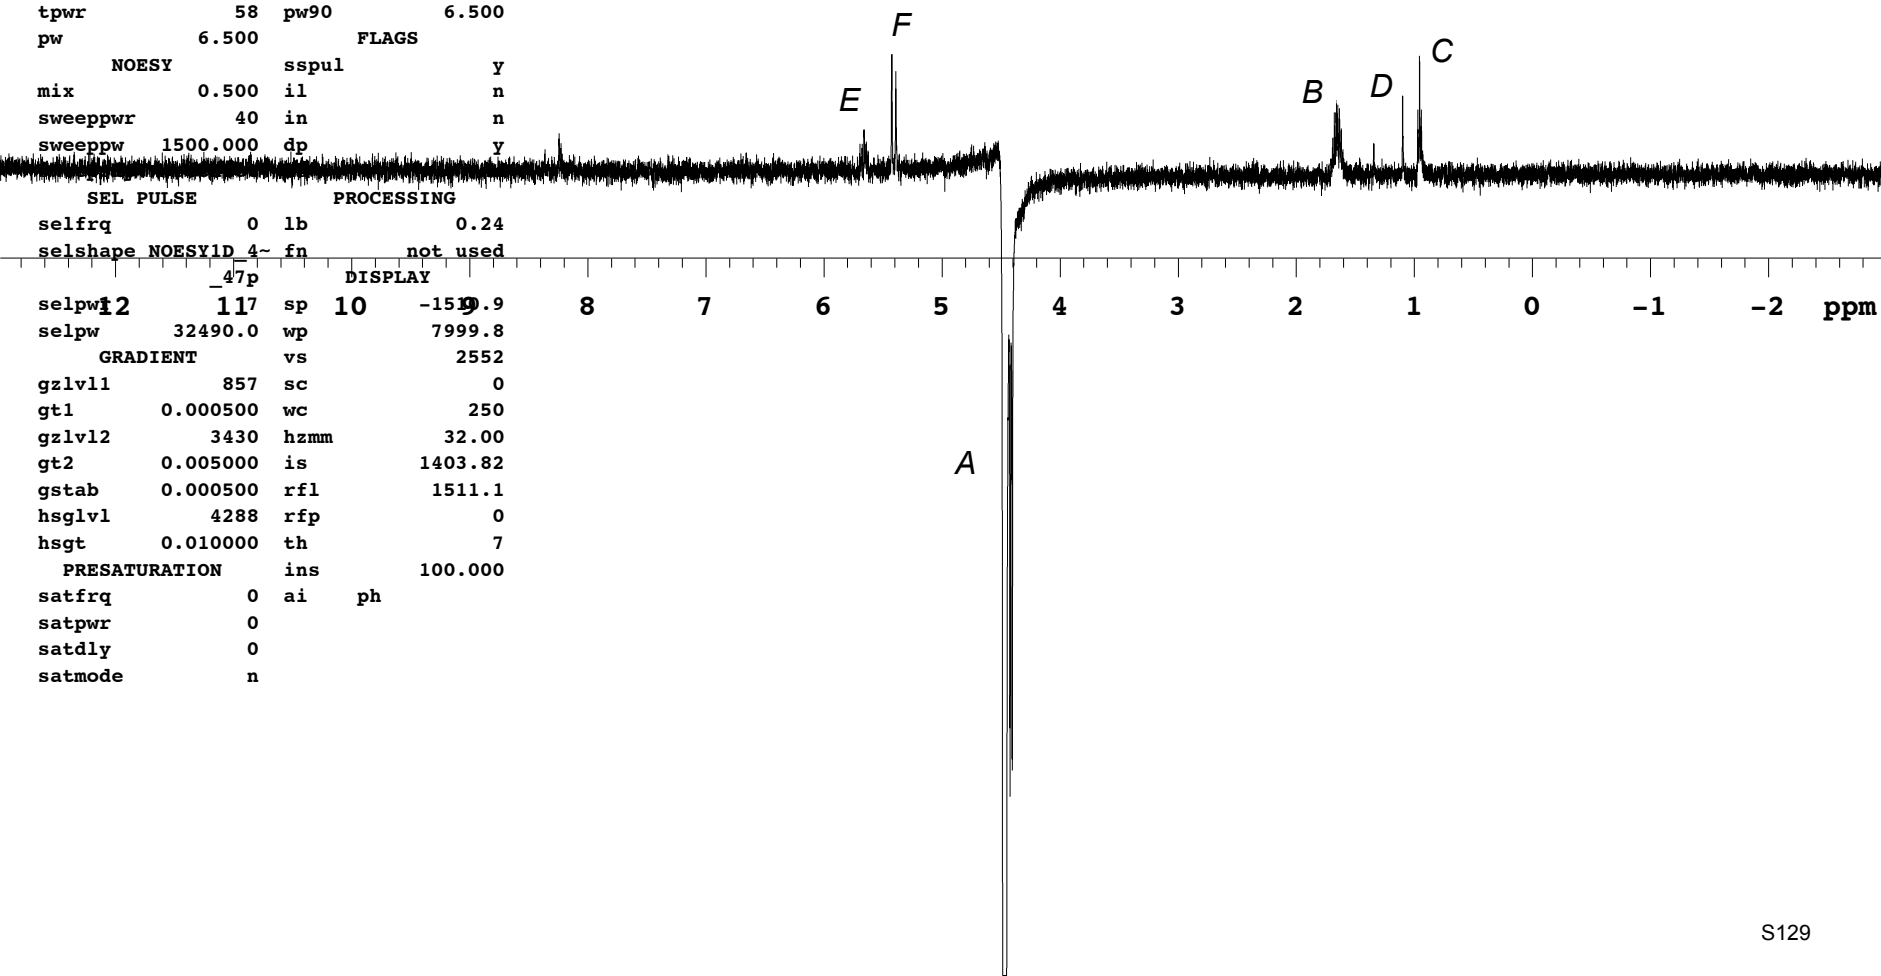



expl NOESY1D

| ACQUISITION |        | DE                  |                |
|-------------|--------|---------------------|----------------|
| sw          | 8000.0 | dn                  |                |
| at          | 4.096  | dm                  |                |
| np          | 65536  |                     |                |
| fb          | 4000   | date                |                |
| bs          | 16     | solvent             | CDC13          |
| ss          | -2     | file                | /export/home/~ |
| d1          | 1.000  | data                | White/big/MA~  |
| nt          | 128    | B.Me.Et.imid.noesy~ |                |
| ct          | 101    |                     | 3.fid          |

| TRANSMITTER |         | SPECIAL |          |
|-------------|---------|---------|----------|
| tn          | H1      | temp    | not used |
| sfrq        | 500.070 | gain    | 60       |
| tof         | 0       | spin    | not used |
| tpwr        | 58      | pw90    | 6.500    |
| pw          | 6.500   | FLAGS   |          |

| NOESY   |          | sspul |   |
|---------|----------|-------|---|
| mix     | 0.500    | il    | n |
| sweppwr | 40       | in    | n |
| sweppw  | 1500.000 | dp    | y |

| SEL PULSE |            | PROCESSING |          |
|-----------|------------|------------|----------|
| selfrq    | 0          | lb         | 0.24     |
| selshape  | NOESY1D_1~ | fn         | not used |

| _64p   |         | DISPLAY |        |
|--------|---------|---------|--------|
| selpw1 | 110     | sp      | 10     |
| selpw  | 23095.5 | wp      | 1519.9 |
|        |         | vs      | 7999.8 |

| GRADIENT |          | vs   |         |
|----------|----------|------|---------|
| gzlv11   | 857      | sc   | 0       |
| gt1      | 0.000500 | wc   | 250     |
| gzlv12   | 3430     | hzmm | 32.00   |
| gt2      | 0.005000 | is   | 1403.82 |
| gstab    | 0.000500 | rfl  | 1511.1  |
| hsglv1   | 4288     | rpf  | 0       |
| hsgt     | 0.010000 | th   | 7       |

| PRESATURATION |   | ins |    |
|---------------|---|-----|----|
| satfrq        | 0 | ai  | ph |
| satpwr        | 0 |     |    |
| satdly        | 0 |     |    |
| satmode       | n |     |    |

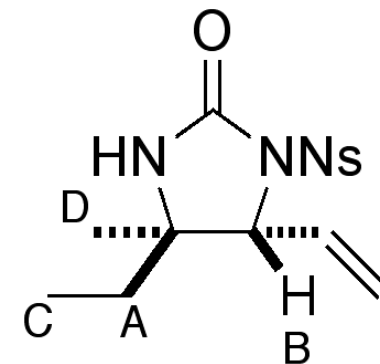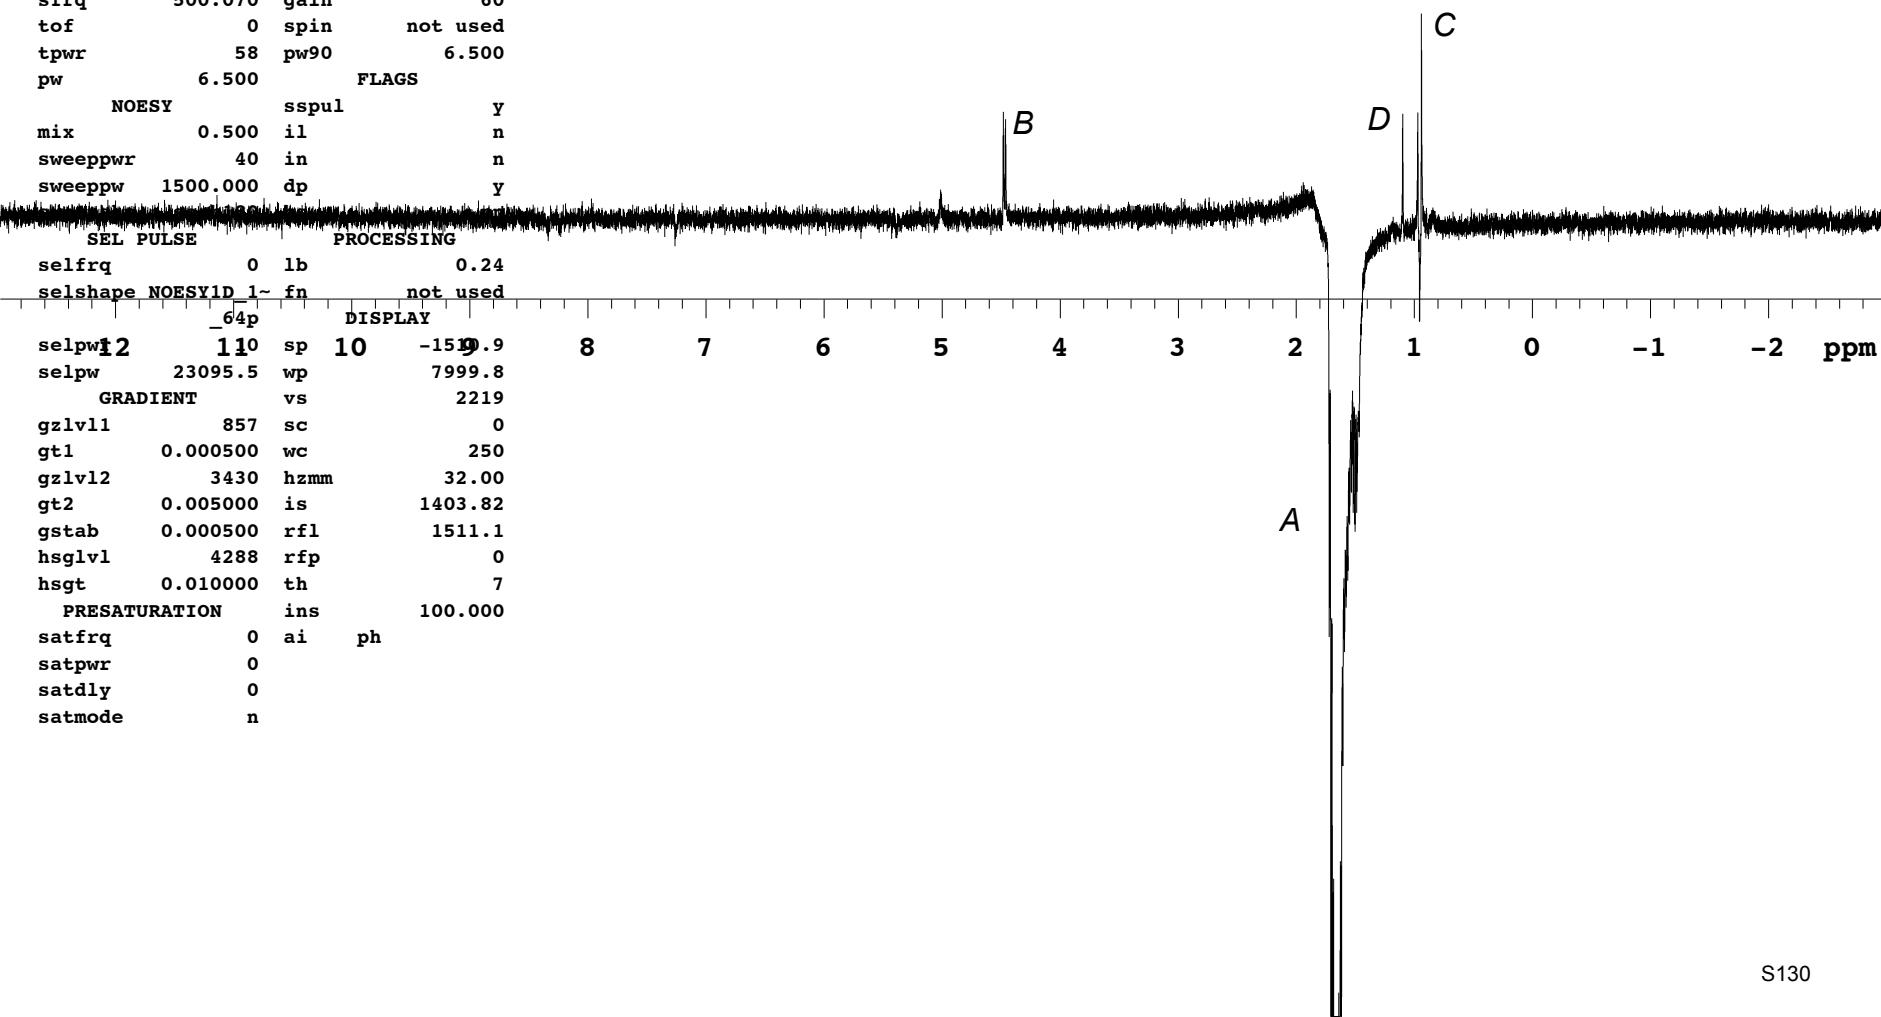

Supplement: NIHMS511760-supplement-1_si_002.pdf [file NIHMS511760-supplement-1_si_002.pdf]
